# Supplementary material for: Manganese(i)-catalyzed access to 1,2-bisphosphine ligands
Source: Royal Society of Chemistry journal article supplement (doi:10.1039/d1sc06694c), 2022-01-01

## Supplementary Information

### **Manganese (I)-Catalyzed Access to 1,2-Bisphosphine Ligands**

Luo Ge, Syuzanna R. Harutyunyan\*

Stratingh Institute for Chemistry, University of Groningen, Nijenborgh 4, 9747 AG, Groningen, The Netherlands.

Correspondence and requests for materials should be addressed to S.R.H. (e-mail: s.harutyunyan@rug.nl)

## Table of contents

1. General experimental information
2. Determination of absolute configuration and NMR spectroscopic studies
3. Manganese (I)-Catalyzed Asymmetric Hydrophosphination of  $\alpha$ ,  $\beta$ -unsaturated Phosphine Oxides
4. Application of **7ca** in the catalytic asymmetric hydrophosphination of **1a** and **8**.
5. Substrate Synthesis
6. References
7. NMR spectra

## 1. General experimental information

All reactions using oxygen- and/or moisture-sensitive materials were carried out with anhydrous and deoxygenated solvents under a nitrogen atmosphere using oven dried glassware and standard Schlenk techniques. Reactions of hydrophosphination using toluene as solvent were carried out using the glovebox. Reactions were monitored by  $^1\text{H}$  NMR and  $^{31}\text{P}$  NMR. Purification of the products was performed by flash-column chromatography using Merck 60 Å 230-400 mesh silica gel. NMR data was collected on Varian VXR400 ( $^1\text{H}$  at 400 MHz;  $^{13}\text{C}$  at 100.58 MHz) equipped with a 5 mm  $z$ -gradient broadband probe. Chemical shifts are reported in parts per million (ppm) relative to residual solvent peak ( $\text{CDCl}_3$ ,  $^1\text{H}$ : 7.26 ppm,  $^{13}\text{C}$ : 77.16 ppm; Toluene- $d_8$ ,  $^1\text{H}$ : 7.09 7.00 6.98 2.06 ppm,  $^{13}\text{C}$ : 129.2 128.3 125.49 20.4 ppm ). Coupling constants are reported in Hertz. Multiplicity is reported with the usual abbreviations (s: singlet, d: doublet, br s: broad singlet, dd: doublet of doublets, t: triplet, m: multiplet). Exact mass spectra were recorded on a LTQ Orbitrap XL apparatus with ESI ionization. Enantiomeric excess ( $ee$ ) of all compounds was determined by Chiral HPLC analysis using a Shimadzu LC-10ADVP HPLC equipped with a Shimadzu SPD-M10AVP diode array detector.

Unless otherwise indicated, reagents and substrates were purchased from commercial sources and used as received. Solvents not required to be dry were purchased as technical grade and used as received. Dry solvents were freshly collected from a dry solvent purification system prior to use. Inert atmosphere experiments were performed with standard Schlenk techniques with dried ( $\text{P}_2\text{O}_5$ ) nitrogen gas or inside the glovebox (the levels of  $\text{O}_2$  and  $\text{H}_2\text{O}$  were maintained under 0.1ppm). Acetylene derivatives (**S1**), diarylphosphine oxides (**S2**), diphenyl(vinyl) phosphine oxide (**1'b**), Phosphine reagents (**R<sub>2</sub>PH**) were purchased from Sigma-Aldrich, TCI and ABCR. Unless otherwise noted substrates were prepared by literature reported methods (*vide infra*). All new compounds were fully characterized by  $^1\text{H}$ ,  $^{13}\text{C}$  and  $^{31}\text{P}$  NMR, HPLC and HRMS techniques.

## 2. Determination of absolute configuration and NMR studies

### 2.1 Determination of the absolute configuration of 6aa

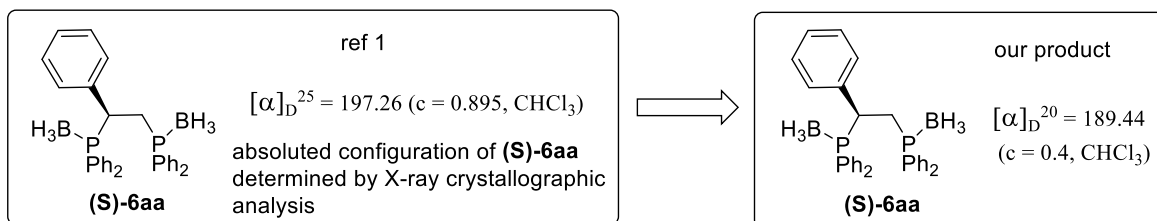

The absolute configuration of the product **6aa** has been determined by X-ray crystallographic analysis in Yin's work (*Angew. Chem., Int. Ed.* **2020**, *59*, 7057–7062).<sup>1</sup> In their report, the optical rotation of **(S)-6aa** is  $[\alpha]_D^{25} = 197.26$  ( $c = 0.895$ ,  $\text{CHCl}_3$ ). For our product **6aa**, the optical rotation is  $[\alpha]_D^{20} = 189.44$  ( $c = 0.4$ ,  $\text{CHCl}_3$ ). Thus, the product **6aa** obtained via our protocol with **(R<sub>c</sub>, S<sub>p</sub>)-C1** as the catalyst is S configuration. The absolute configuration of other products was assigned accordingly.

### 2.2 Determination of the absolute configuration of 3za

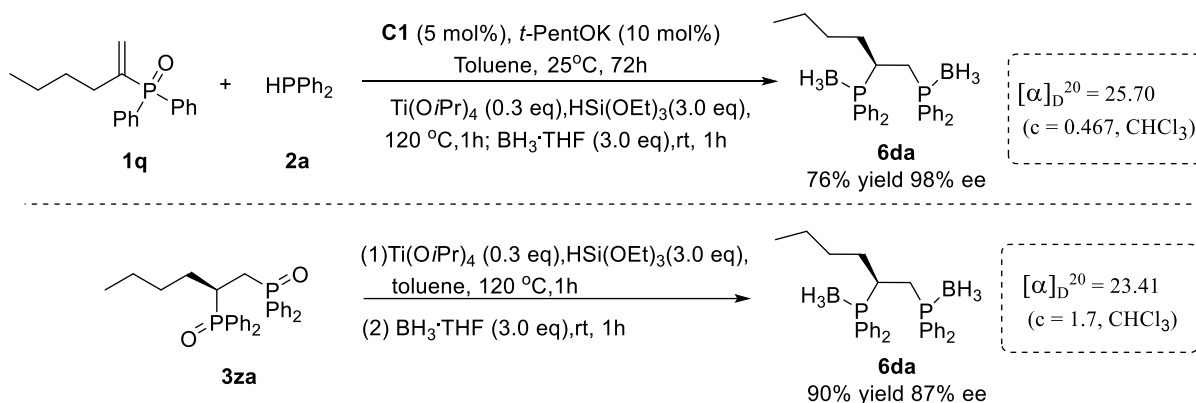

**3za** was transformed to **6da** through reduction, which led to the determination of the absolute configuration of **3za**.

### 2.3 NMR spectroscopic studies

NMR spectroscopic studies were performed to understand interactions between activated Mn-complex and phosphine oxide substrate. <sup>31</sup>P NMR spectroscopy at rt temperature was used for this purpose. All the NMR tube samples were prepared in glove box using young valve NMR tubes and deuterated toluene as a solvent. As it can be seen from the figure below upon addition of 2.0 eq. of base to **Mn(I)-L** new compound, namely activated Mn-catalyst is being formed as it can be deduced by the disappearance of the original peak and the appearance of a new one. Upon addition of 10 eq. of phosphine oxide **1a** which is completely soluble in toluene, the only peak that can be observed is from the oxide itself, while activated complex disappears. This process is also accompanied by large amount of precipitate formed which could not be characterized since it was decomposed upon attempts to isolate. This precipitate doesn't form

under reaction conditions when diphenylphosphine is also present and therefore it can't be related to some intermediate that is involved in the reaction path. Further detailed studies are required to get clear mechanistic picture of this transformation.

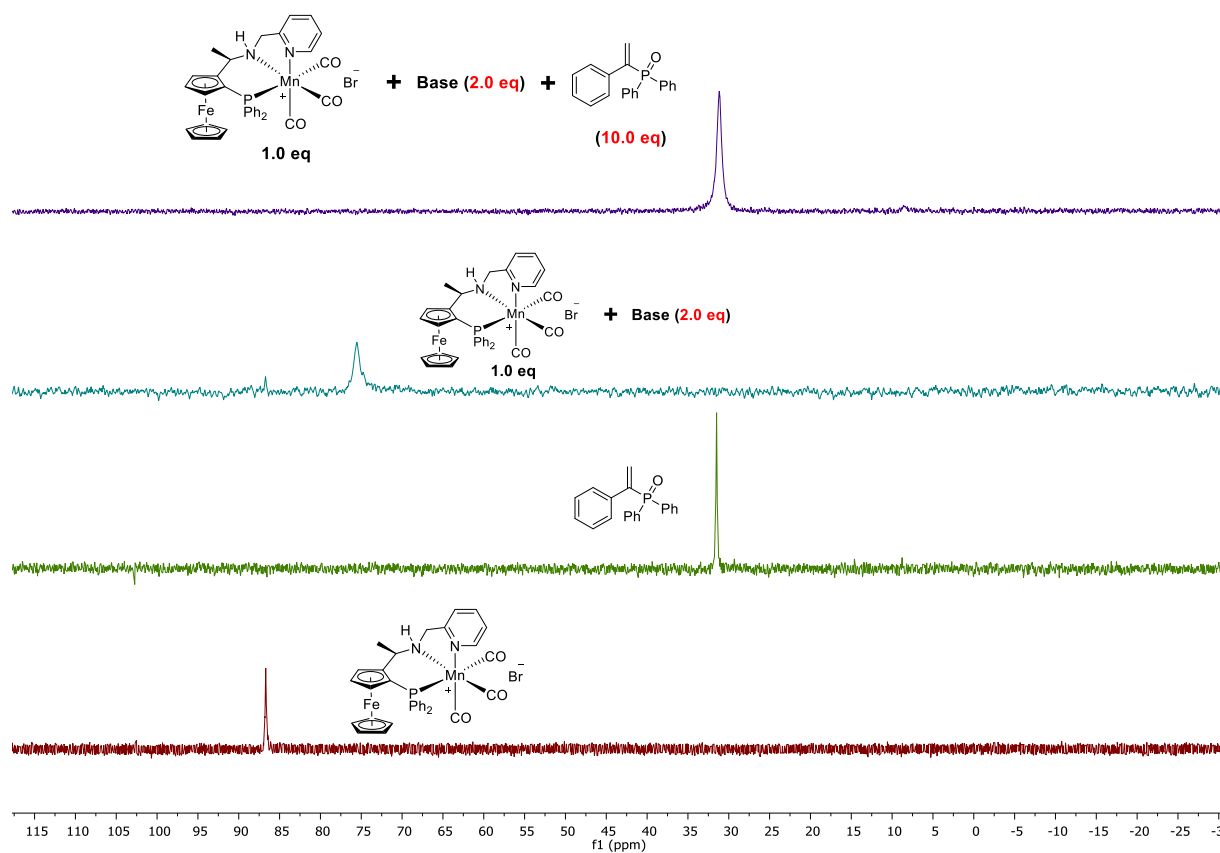

**Scheme S1:** <sup>31</sup>P NMR in d-toluene from the bottom to the top: Mn(I)-L, **1a**, Mn(I)-L + 2.0 equiv. of tPentOK, Mn(I)-L + 2.0 eq. of tPentOK + 10.0 eq. of **1a**

### 3. Manganese (I)-Catalyzed Asymmetric Hydrophosphination/Protonation of $\alpha$ , $\beta$ -unsaturated Phosphine Oxides

#### 3.1 General procedure A

All the reactions performed with toluene as solvent were carried out inside the glovebox in order to ensure inert reaction conditions. In an oven-dried 4 mL vial equipped with a magnetic stirring bar, **Mn(I)-L** (0.0025 mmol, 2.5 mol%) was dissolved in 0.5 mL of deoxygenated toluene and stirred for 1 min. Then, a commercially available solution of *t*PentOK 1.7 M in dry, deoxygenated toluene (0.005 mmol, 5 mol%) or Barton's base (0.005 mmol, 5 mol%) was added and the mixture was stirred during 5 min, observing complete solubility of the catalyst and a change in color of the solution due to the activation of the catalyst. When toluene is used as solvent and *t*PentOK as a base, a color change of the solution from yellow to dark red is observed. This color change is indicative of the catalyst activation.\* After 5 min stirring, the substrate **1** (0.1 mmol, 1.0 equiv) (dissolved in 0.5 mL of deoxygenated toluene) was added at once followed by the addition of the phosphine **2** (0.105 mmol, 1.05 equiv).\*\* (when the reaction was carried out at 60 °C, after the addition of substrate **1** and phosphine **2**, the reaction mixture was taken out of the glovebox and heated to 60 °C). The reaction was monitored by analysing aliquots of the reaction mixture by <sup>31</sup>P NMR spectroscopy. After observing full consumption of the starting materials, the reaction mixture was loaded directly onto a column packed with silica gel, and eluted with pentane/ethyl acetate/methanol to give the desired product.

*\* If there is no colour change observed when toluene and *t*PentOK are used as the solvent and base, respectively, the catalyst has either decomposed or not enough base has been added to activate the catalyst. As a result, the reaction will not occur.*

*\*\* High purity of the starting materials, catalyst and solvents used in the hydrophosphination reaction is of great importance for the reaction to work.*

#### 3.2 General procedure B: One-pot synthesis of chiral 1,2-bisphosphine boranes (6aa-6da)

All the reactions performed with toluene as solvent were carried out inside the glovebox in order to ensure inert reaction conditions. In an oven-dried 25 mL Schlenk tube equipped with a magnetic stirring bar, **Mn(I)-L** (0.005 mmol, 2.5 mol%) was dissolved in 0.5 mL of deoxygenated toluene and stirred for 1 min. Then, a commercially available solution of *t*PentOK 1.7 M in dry, deoxygenated toluene (0.01 mmol, 5 mol%) was added and the mixture was stirred during 5 min, observing complete solubility of the catalyst and a change in color of the solution due to the activation of the catalyst. When toluene is used as solvent and *t*PentOK as a base, a color change of the solution from yellow to dark red is observed. This color change is indicative of the catalyst activation. After 5 min stirring, the substrate **1** (0.2 mmol, 1.0 equiv) (dissolved in 1 mL of deoxygenated toluene) was added at once followed by the addition of phosphine **2** (0.21 mmol, 1.05 equiv). The reaction was monitored by analysing aliquots of the reaction mixture by <sup>31</sup>P NMR spectroscopy. After observing full consumption of the starting materials, HSi(OEt)<sub>3</sub> (0.6 mmol, 3.0 equiv) and Ti(OiPr)<sub>4</sub> (0.06 mmol, 30 mol%) were added sequentially via syringe. The reaction mixture was taken out of the glovebox and heated to 120 °C for an hour. After that, the reaction was cooled to room temperature and BH<sub>3</sub> (1 M in THF)

(0.8 mmol, 4.0 equiv) was added via syringe under N<sub>2</sub> atmosphere. The resulting reaction mixture was stirred at room temperature for an hour. After removal of the volatiles under reduced pressure, the crude was purified by silica gel column chromatography (pentane/dichloromethane = 2/1) to afford the desired product **6**.

### 3.3 General procedure C: Synthesis of chiral 1,2-bisphosphines (7aa-7da)\*

A dried 25 mL Schlenk tube equipped with a magnetic stirring bar was charged with chiral phosphine boranes **6** (0.10 mmol, 1.0 equiv), DABCO (0.40 mmol, 4.0 equiv) and degassed toluene (2.5 mL) under N<sub>2</sub> atmosphere. The reaction mixture was stirred at 50 °C for 12h. After that, the reaction was cooled to room temperature and the reaction mixture was washed with degassed water (5 x 2 mL) N<sub>2</sub> atmosphere. The organic phase was dried by MgSO<sub>4</sub>, and then filtered under N<sub>2</sub> atmosphere. After removal of the volatiles in high vacuum (0.1mm Hg), the desired product **7** was obtained as a solid.

*\* Degassed toluene, water and N<sub>2</sub> atmosphere are of great importance for obtaining the pure product.*

### 3.4 Procedure for the synthesis of racemic product

All the racemic hydrophosphination reactions were performed inside the glovebox to ensure inert reaction conditions. In an oven-dried 4 mL vial equipped with a magnetic stirring bar the substrate **1** (0.1 mmol, 1.0 equiv) were dissolved in toluene (1 mL). Then, a commercially available solution of *t*PentOK (1.7 M in toluene, 30 mol%) was added followed by the addition of HPPH<sub>2</sub> (0.105 mmol, 1.05 equiv). After stirring overnight at room temperature, the reaction mixture was loaded directly onto a column packed with silica gel, and eluted with pentane/ethyl acetate/methanol to give the desired product.

### 3.5 Procedure for the preparative scale (3 mmol, 1.0g) reaction

In an oven-dried round bottom flask, located inside the glovebox and equipped with a septum and a magnetic stirring bar, **Mn(I)-L** (0.015 mmol, 0.5 mol%) was added and it was dissolved in dry, deoxygenated toluene (15 mL). The mixture was stirred inside the glovebox for 5 min. Then, a commercially available solution of *t*PentOK 1.7 M in toluene (0.03 mmol, 1 mol%) was added and the mixture was stirred for 10 min to activate the catalyst. Upon activation of the catalyst, a change in the color of the solution from yellow to dark red was observed. The substrate **1b** (3.0 mmol, 1.0 equiv) was added at once, followed by the drop-wise addition of HPPH<sub>2</sub> (3.15 mmol, 1.05 equiv) over a period of 2 min. After stirring at room temperature for 48 h, the resulting mixture was evaporated and the residue was purified by column chromatography using pentane/ethyl acetate/methanol (1:1:0.05) to afford the desired product **3ba** with 91% yield and 98% ee.

### Specific experimental details and product characterization

#### (S)-(2-(diphenylphosphanyl)-1-phenylethyl)diphenylphosphine oxide (3aa)

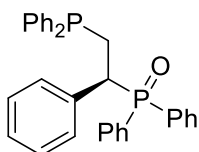

**Following general procedure A:** The reaction was performed with **1a** (0.1 mmol, 1 equiv.), manganese catalyst (0.0025 mmol, 2.5 mol%), *t*PentOK (0.005 mmol, 5 mol%), **2a** (0.105 mmol, 1.05 equiv.), toluene (1.0 mL) at 25 °C for 16 h. Product **3aa** was obtained as a white solid after column chromatography (SiO<sub>2</sub>, pentane/ethyl acetate/methanol = 1:1:0.05) [96% yield, >99% ee].

**<sup>1</sup>H NMR (CDCl<sub>3</sub>, 400 MHz):** δ 7.61-7.52 (m, 3H, CH<sub>Ar</sub>), 7.47-7.42 (m, 3H, CH<sub>Ar</sub>), 7.38-7.30 (m, 4H, CH<sub>Ar</sub>), 7.27-7.14 (m, 15H, CH<sub>Ar</sub>), 3.30-3.25 (m, 1H, P(O)Ph<sub>2</sub>CH), 2.90-2.85 (m, 1H, PPh<sub>2</sub>CHH), 2.59-2.56 (m, 1H, PPh<sub>2</sub>CHH).

**<sup>13</sup>C NMR (CDCl<sub>3</sub>, 101 MHz):** δ 138.8, 138.7, 137.3, 137.2, 135.3, 134.5, 134.4, 131.9, 131.7, 131.4, 131.3, 131.0, 130.1, 129.6, 128.8, 128.8, 128.7, 128.4, 128.3, 128.3, 128.1, 128.0, 128.0, 127.4, 43.6, 43.2, 29.0, 28.9. (Due to C–P coupling and the complexity of the spectrum, doublets cannot be assigned and they are listed as singlets)

**<sup>31</sup>P NMR (162 MHz, CDCl<sub>3</sub>):** δ 33.5 (d, *J* = 31.5 Hz), -19.7 (d, *J* = 31.5 Hz).

**HRMS (ESI, m/z):** calcd. for C<sub>32</sub>H<sub>29</sub>OP<sub>2</sub> [M+H]<sup>+</sup>: 491.1688, found: 491.1686.

**HPLC:** Chiracel-ADH, *n*-heptane/*i*-PrOH 80:20, 1.0 mL/min., 40 °C, detection at 206 nm. Retention time (min): 12.9 (minor) and 16.6 (major).

#### <Chromatogram>

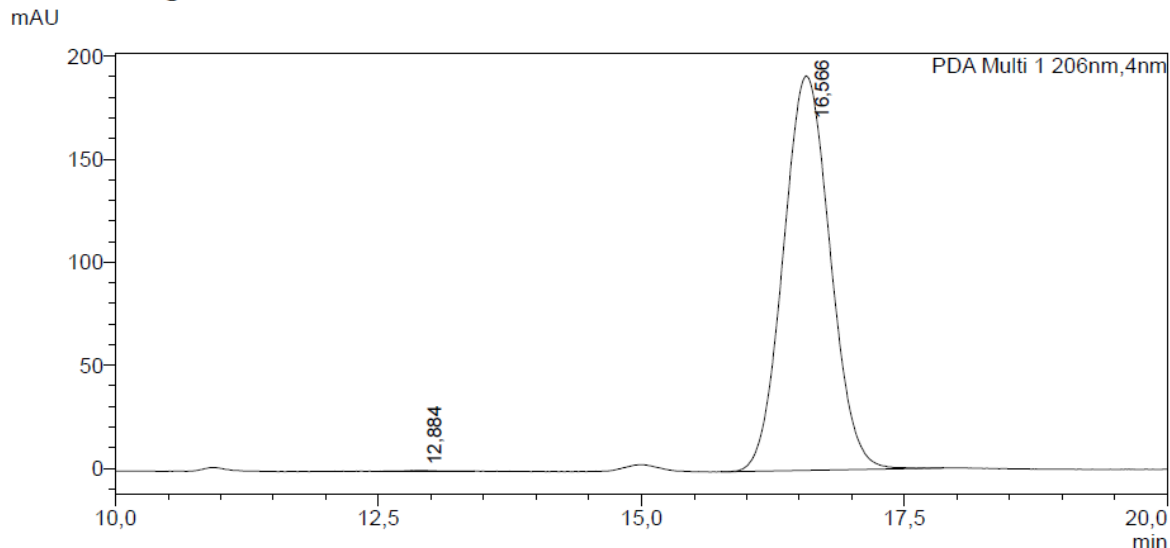

#### <Peak Table>

| PDA Ch1 206nm |           |         |        |         |
|---------------|-----------|---------|--------|---------|
| Peak#         | Ret. Time | Area    | Height | Area%   |
| 1             | 12,884    | 10503   | 464    | 0,176   |
| 2             | 16,566    | 5942806 | 191401 | 99,824  |
| Total         |           | 5953309 | 191866 | 100,000 |



### <Chromatogram>

mAU

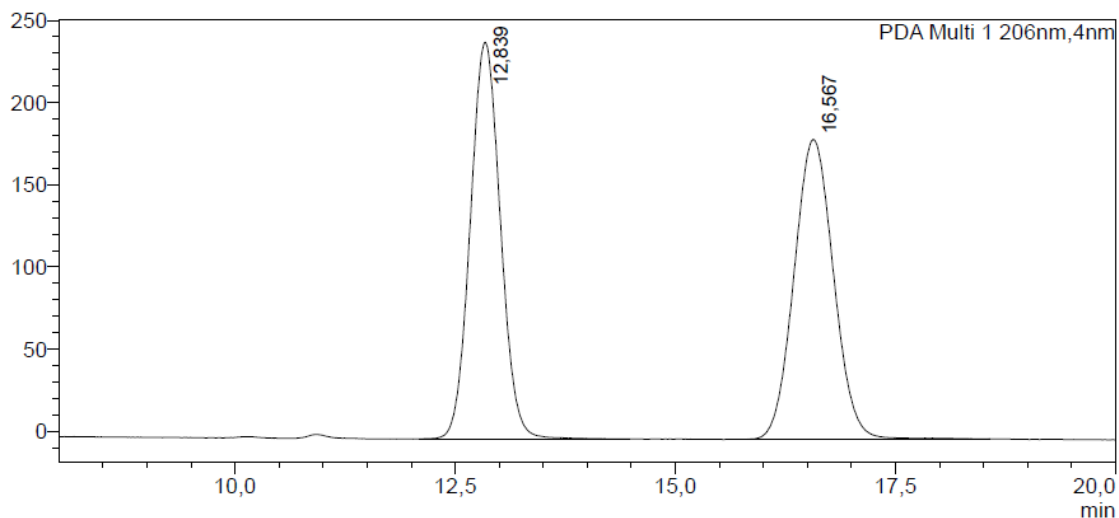

### <Peak Table>

PDA Ch1 206nm

| Peak# | Ret. Time | Area     | Height | Area%   |
|-------|-----------|----------|--------|---------|
| 1     | 12,839    | 5752588  | 241197 | 50,190  |
| 2     | 16,567    | 5709111  | 182401 | 49,810  |
| Total |           | 11461699 | 423597 | 100,000 |

### UV Spectrum

Peak# : 1  
Retention Time : 12,839 min  
Compound Name :  
Spectrum Operation:

mAU

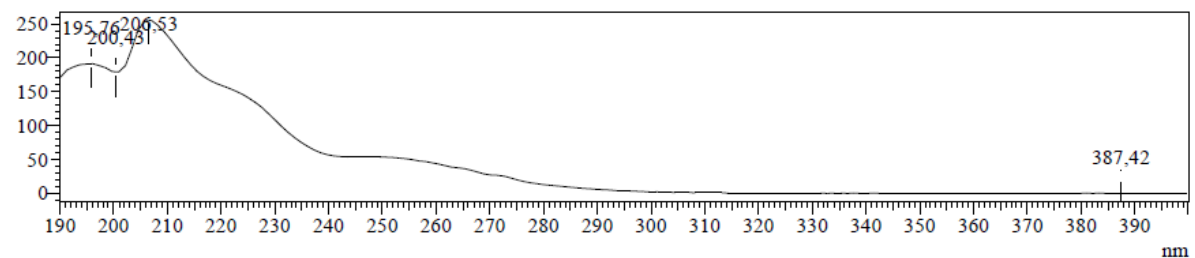

Peak# : 2  
Retention Time : 16,567 min  
Compound Name :  
Spectrum Operation:

mAU

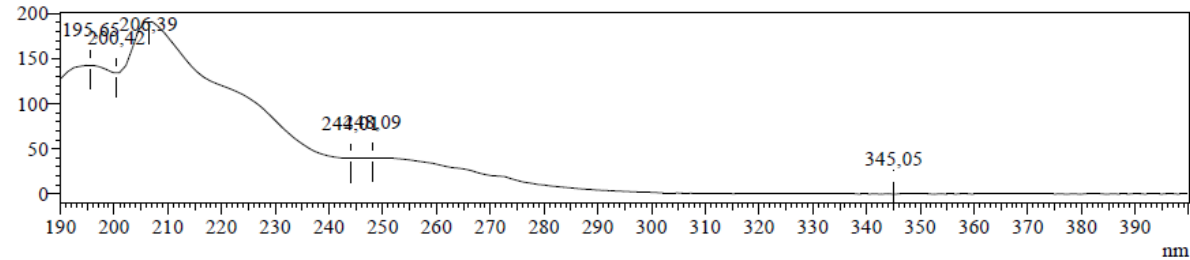

**(S)-2-(2-(diphenylphosphanyl)-1-(4-methoxyphenyl)ethyl)diphenylphosphine oxide (3ba)**

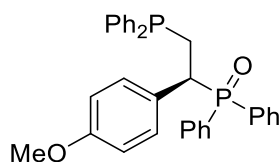

**Following general procedure A:** The reaction was performed with **1b** (0.1 mmol, 1 equiv.), manganese catalyst (0.0025 mmol, 2.5 mol%), *t*PentOK (0.005 mmol, 5 mol%), **2a** (0.105 mmol, 1.05 equiv.), toluene (1.0 mL) at 25°C for 16 h. Product **3ba** was obtained as a white solid after column chromatography (SiO<sub>2</sub>, pentane/ethyl acetate/methanol = 1:1:0.05) [90% yield, 98% ee].

**<sup>1</sup>H NMR (CDCl<sub>3</sub>, 400 MHz):** δ 7.63 – 7.48 (m, 3H, CH<sub>Ar</sub>), 7.46 – 7.20 (m, 10H, CH<sub>Ar</sub>), 7.20 – 7.09 (m, 9H, CH<sub>Ar</sub>), 6.71 (d, *J* = 8.2 Hz, 2H, CH<sub>Ar</sub>), 3.73 (s, 3H, OCH<sub>3</sub>), 3.32 – 3.16 (m, 1H, P(O)Ph<sub>2</sub>CH), 2.87 – 2.78 (m, 1H, PPh<sub>2</sub>CHH), 2.61 – 2.45 (m, 1H, PPh<sub>2</sub>CHH).

**<sup>13</sup>C NMR (CDCl<sub>3</sub>, 101 MHz):** δ 158.9, 158.9, 138.7, 138.5, 137.2, 137.0, 134.5, 134.3, 132.6, 131.9, 131.9, 131.8, 131.8, 131.6, 131.5, 131.4, 131.3, 131.3, 131.1, 131.1, 131.0, 130.9, 129.7, 128.9, 128.8, 128.7, 128.3, 128.3, 128.1, 128.0, 127.1, 127.1, 127.1, 127.0, 114.0, 113.9, 55.2, 42.8, 42.7, 42.2, 42.0, 29.2, 29.0. (Due to C–P coupling and the complexity of the spectrum, doublets cannot be assigned and they are listed as singlets)

**<sup>31</sup>P NMR (CDCl<sub>3</sub>, 162 MHz):** δ 30.6 (d, *J* = 31.6 Hz), -22.5 (d, *J* = 31.6 Hz).

**HRMS (ESI, m/z):** calcd. for C<sub>33</sub>H<sub>31</sub>O<sub>2</sub>P<sub>2</sub> [M+H]<sup>+</sup>: 521.1794, found: 521.1794.

**HPLC:** Chiracel-ADH, *n*-heptane/*i*-PrOH 80:20, 1.0 mL/min., 40 °C, detection at 206 nm. Retention time (min): 21.7 (minor) and 31.7 (major).

#### <Chromatogram>

mAU

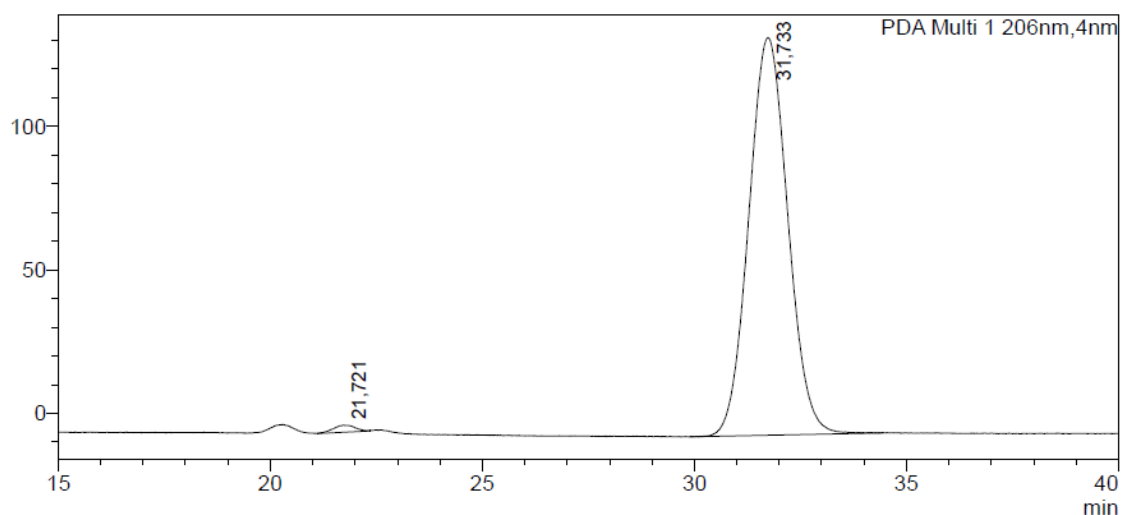

#### <Peak Table>

PDA Ch1 206nm

| Peak# | Ret. Time | Area    | Height | Area%   |
|-------|-----------|---------|--------|---------|
| 1     | 21,721    | 89701   | 2528   | 1,001   |
| 2     | 31,733    | 8872799 | 138558 | 98,999  |
| Total |           | 8962499 | 141086 | 100,000 |

### <Chromatogram>

mAU

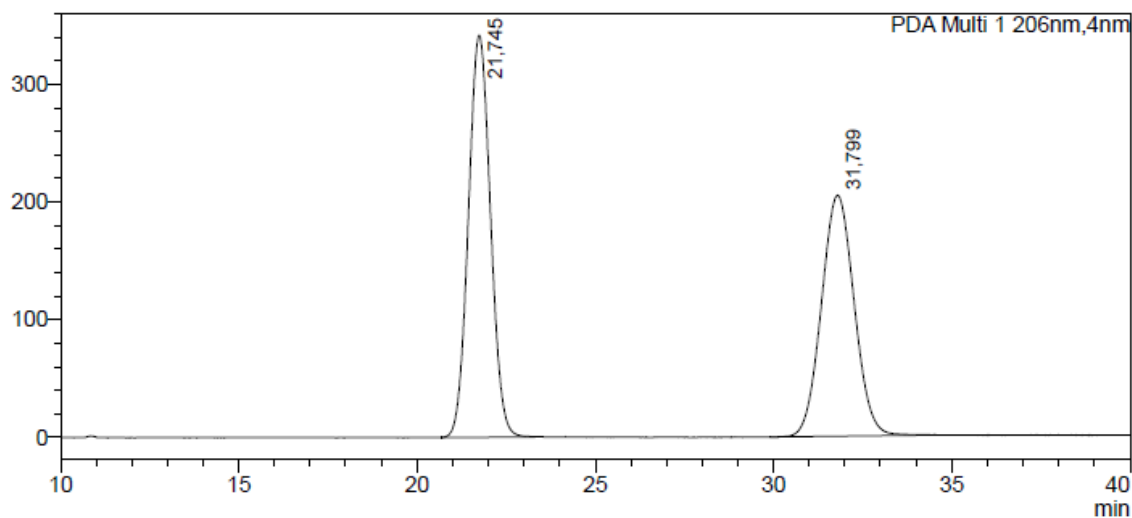

### <Peak Table>

PDA Ch1 206nm

| Peak# | Ret. Time | Area     | Height | Area%   |
|-------|-----------|----------|--------|---------|
| 1     | 21,745    | 14721136 | 341380 | 52,937  |
| 2     | 31,799    | 13087496 | 204716 | 47,063  |
| Total |           | 27808632 | 546096 | 100,000 |

### UV Spectrum

Peak# : 1  
Retention Time : 21,745 min  
Compound Name :  
Spectrum Operation:

mAU

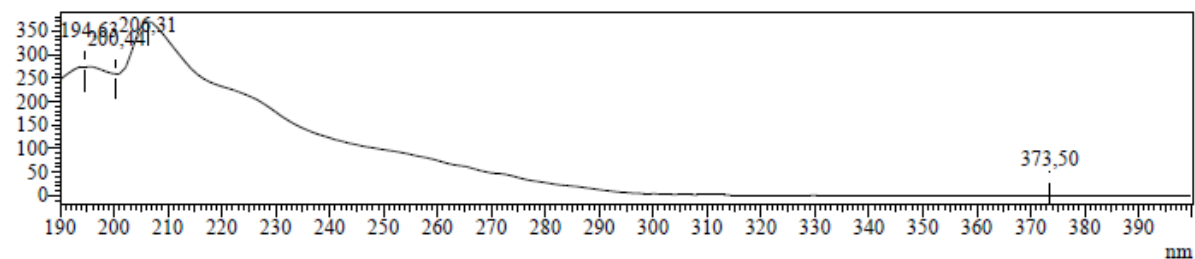

Peak# : 2  
Retention Time : 31,799 min  
Compound Name :  
Spectrum Operation:

mAU

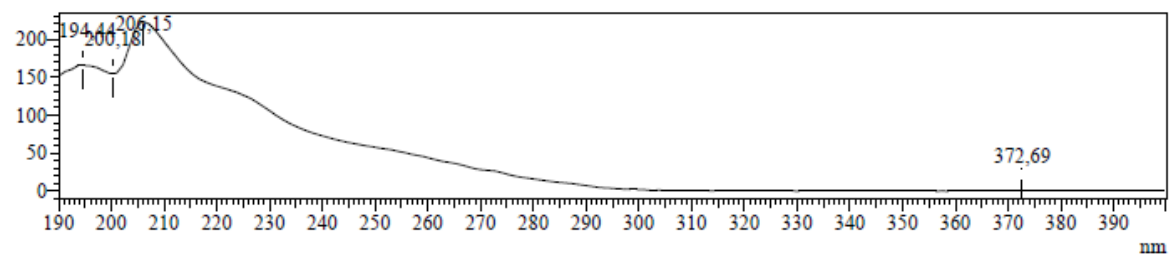

**(S)-(2-(diphenylphosphanyl)-1-(p-tolyl)ethyl)diphenylphosphine oxide (3ca)**

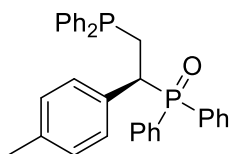

**Following general procedure A:** The reaction was performed with **1c** (0.1 mmol, 1 equiv.), manganese catalyst (0.0025 mmol, 2.5 mol%), *t*PentOK (0.005 mmol, 5 mol%), **2a** (0.105 mmol, 1.05 equiv.), toluene (1.0 mL) at 25°C for 16 h. Product **3ca** was obtained as a white solid after column chromatography (SiO<sub>2</sub>, pentane/ethyl acetate/methanol = 1:1:0.05) [88% yield, 98% ee].

**<sup>1</sup>H NMR (CDCl<sub>3</sub>, 400 MHz):** δ 7.62 – 7.05 (m, 22H, CH<sub>Ar</sub>), 6.99 – 6.97 (m, 2H, CH<sub>Ar</sub>), 3.26 – 3.19 (m, 1H, P(O)Ph<sub>2</sub>CH), 2.85 – 2.76 (m, 1H, PPh<sub>2</sub>CHH), 2.56 – 2.50 (m, 1H, PPh<sub>2</sub>CHH), 2.25 (s, 3H, CH<sub>3</sub>).

**<sup>13</sup>C NMR (CDCl<sub>3</sub>, 101 MHz):** δ 141.4, 141.3, 141.1, 139.9, 139.7, 139.6, 137.1, 136.9, 135.2, 134.4, 134.3, 134.0, 133.9, 133.8, 133.6, 132.4, 132.2, 131.8, 131.4, 131.3, 130.8, 130.6, 130.5, 45.7, 45.2, 31.7, 31.5, 23.8. (Due to C–P coupling and the complexity of the spectrum, doublets cannot be assigned and they are listed as singlets)

**<sup>31</sup>P NMR (CDCl<sub>3</sub>, 162 MHz)** δ 30.3 (d, *J* = 31.2 Hz), -22.9 (d, *J* = 31.2 Hz).

**HRMS (ESI, m/z):** calcd. for C<sub>33</sub>H<sub>31</sub>OP<sub>2</sub> [M+H]<sup>+</sup>: 505.1845, found: 505.1846.

**HPLC:** Chiracel-ADH, *n*-heptane/*i*-PrOH 80:20, 1.0 mL/min., 40 °C, detection at 206 nm. Retention time (min): 15.0 (minor) and 18.9 (major).

**<Chromatogram>**

mAU

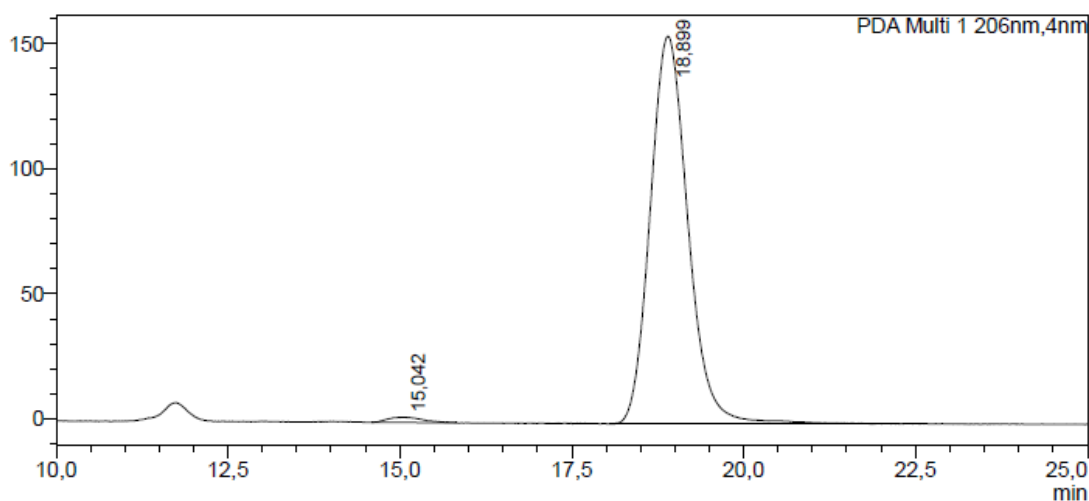

**<Peak Table>**

PDA Ch1 206nm

| Peak# | Ret. Time | Area    | Height | Area%   |
|-------|-----------|---------|--------|---------|
| 1     | 15,042    | 76544   | 2171   | 1,277   |
| 2     | 18,899    | 5916451 | 154844 | 98,723  |
| Total |           | 5992995 | 157015 | 100,000 |

### <Chromatogram>

mAU

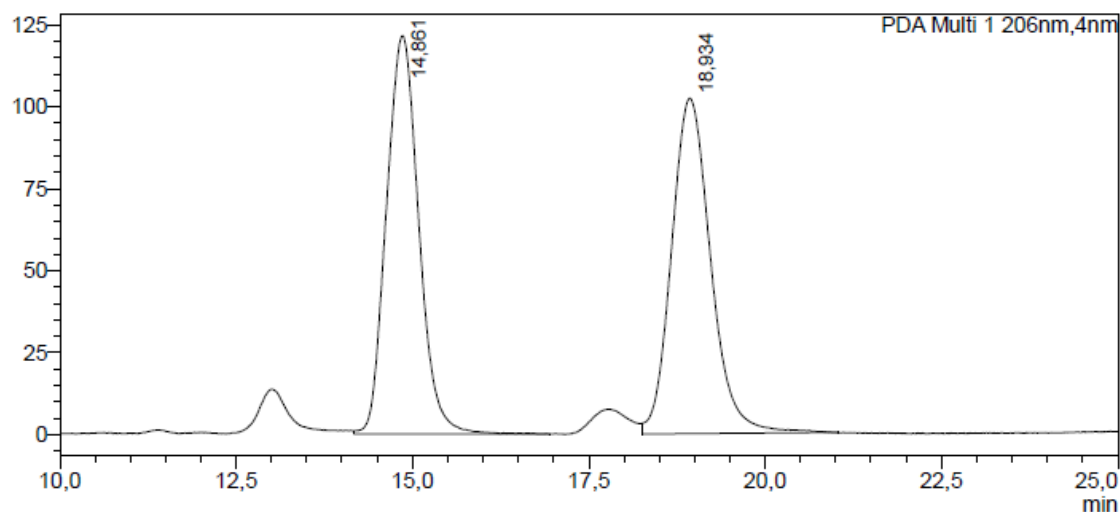

### <Peak Table>

PDA Ch1 206nm

| Peak# | Ret. Time | Area    | Height | Area%   |
|-------|-----------|---------|--------|---------|
| 1     | 14,861    | 3878597 | 121572 | 49,517  |
| 2     | 18,934    | 3954318 | 102409 | 50,483  |
| Total |           | 7832915 | 223982 | 100,000 |

### UV Spectrum

Peak# : 1  
Retention Time : 14,861 min  
Compound Name :  
Spectrum Operation:

mAU

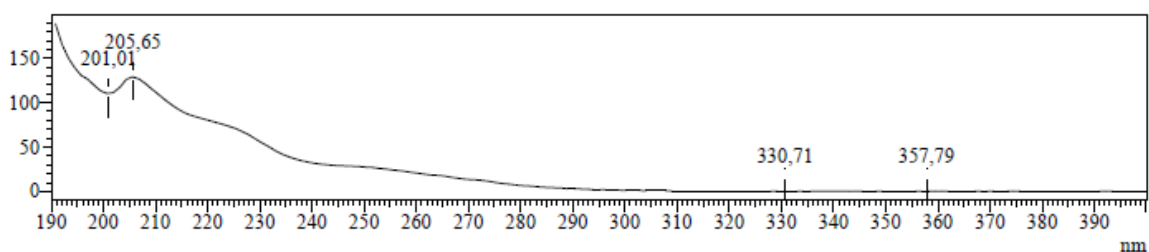

Peak# : 2  
Retention Time : 18,934 min  
Compound Name :  
Spectrum Operation:

mAU

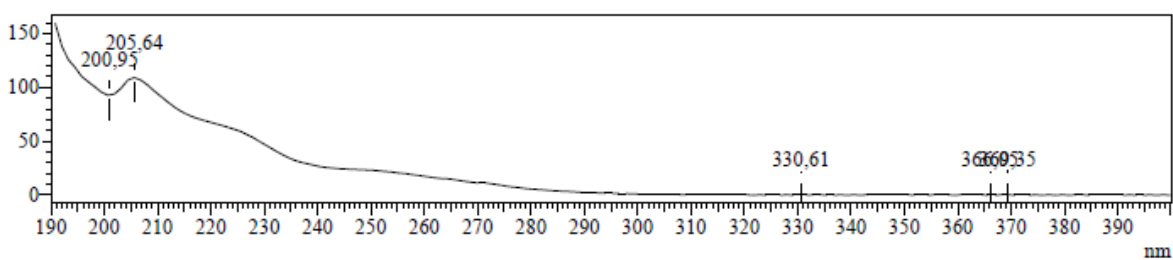

**(S)-(2-(diphenylphosphanyl)-1-(4-fluorophenyl)ethyl)diphenylphosphine oxide (3da)**

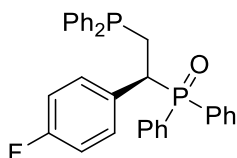

**Following general procedure A:** The reaction was performed with **1d** (0.1 mmol, 1 equiv.), manganese catalyst (0.0025 mmol, 2.5 mol%), *t*PentOK (0.005 mmol, 5 mol%), **2a** (0.105 mmol, 1.05 equiv.), toluene (1.0 mL) at 25°C for 16 h. Product **3da** was obtained as a white solid after column chromatography (SiO<sub>2</sub>, pentane/ethyl acetate/methanol = 1:1:0.05) [98% yield, 98% ee].

**<sup>1</sup>H NMR (CDCl<sub>3</sub>, 400 MHz):** δ 7.66 – 7.55 (m, 3H, CH<sub>Ar</sub>), 7.49 – 7.45 (m, 3H, CH<sub>Ar</sub>), 7.43 – 7.37 (m, 2H, CH<sub>Ar</sub>), 7.36 – 7.27 (m, 5H, CH<sub>Ar</sub>), 7.24 – 7.17 (m, 9H, CH<sub>Ar</sub>), 6.92 – 6.88 (m, 2H, CH<sub>Ar</sub>), 3.35 – 3.27 (m, 1H, P(O)Ph<sub>2</sub>CH), 2.90 – 2.80 (m, 1H, PPh<sub>2</sub>CHH), 2.62 – 2.55 (m, 1H, PPh<sub>2</sub>CHH).

**<sup>13</sup>C NMR (101 MHz, CDCl<sub>3</sub>):** δ 163.3, 163.3, 160.8, 160.8, 138.4, 138.3, 137.1, 136.9, 134.3, 134.1, 132.3, 132.3, 131.9, 131.9, 131.8, 131.7, 131.5, 131.4, 131.4, 131.3, 131.3, 131.2, 131.1, 131.0, 131.0, 131.0, 131.0, 130.8, 130.7, 130.5, 130.2, 130.2, 129.6, 129.2, 129.1, 128.8, 128.8, 128.7, 128.7, 128.6, 128.3, 128.2, 128.1, 128.1, 128.0, 127.9, 115.4, 115.4, 115.2, 115.2, 43.0, 42.9, 42.4, 42.2, 29.0, 28.9. (Due to C–P and C–F coupling and the complexity of the spectrum, doublets cannot be assigned and they are listed as singlets)

**<sup>19</sup>F NMR (376 MHz, CDCl<sub>3</sub>):** δ -115.0.

**<sup>31</sup>P NMR (162 MHz, CDCl<sub>3</sub>):** δ 30.6 (d, *J* = 31.6 Hz), -22.0 (d, *J* = 31.6 Hz).

**HRMS (ESI, m/z):** calcd. for C<sub>32</sub>H<sub>28</sub>FOP<sub>2</sub> [M+H]<sup>+</sup>: 509.1594, found: 509.1595.

**HPLC:** Chiracel-ADH, *n*-heptane/*i*-PrOH 80:20, 1.0 mL/min., 40 °C, detection at 254 nm. Retention time (min): 12.8 (minor) and 15.6 (major).

#### <Chromatogram>

mAU

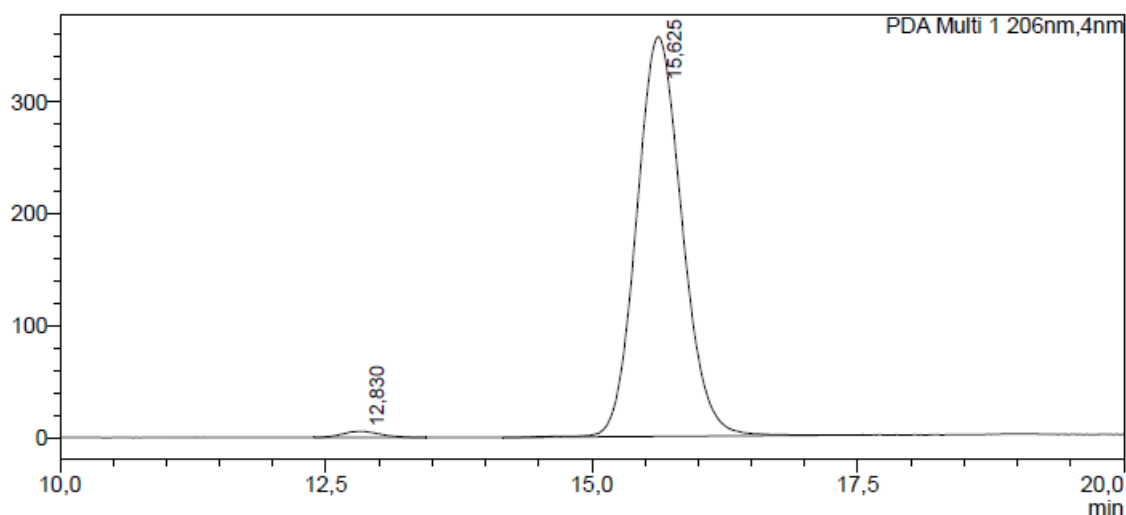

#### <Peak Table>

PDA Ch1 206nm

| Peak# | Ret. Time | Area     | Height | Area%   |
|-------|-----------|----------|--------|---------|
| 1     | 12,830    | 129313   | 5417   | 1,202   |
| 2     | 15,625    | 10627413 | 356864 | 98,798  |
| Total |           | 10756726 | 362281 | 100,000 |

### <Chromatogram>

mAU

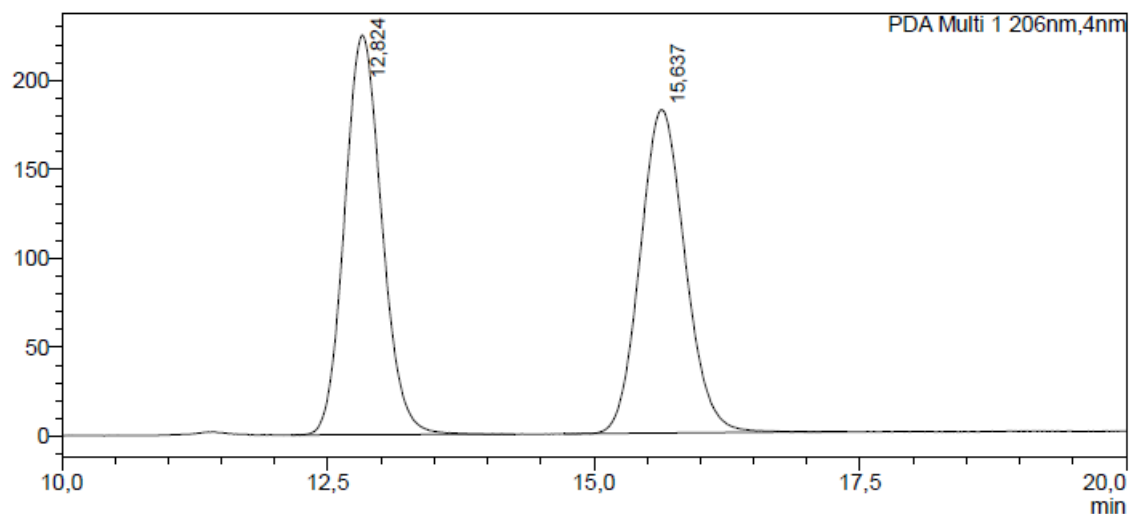

### <Peak Table>

PDA Ch1 206nm

| Peak# | Ret. Time | Area     | Height | Area%   |
|-------|-----------|----------|--------|---------|
| 1     | 12,824    | 5479354  | 224566 | 50,567  |
| 2     | 15,637    | 5356499  | 181813 | 49,433  |
| Total |           | 10835853 | 406378 | 100,000 |

### UV Spectrum

Peak# : 1  
Retention Time : 12,824 min  
Compound Name :  
Spectrum Operation:

mAU

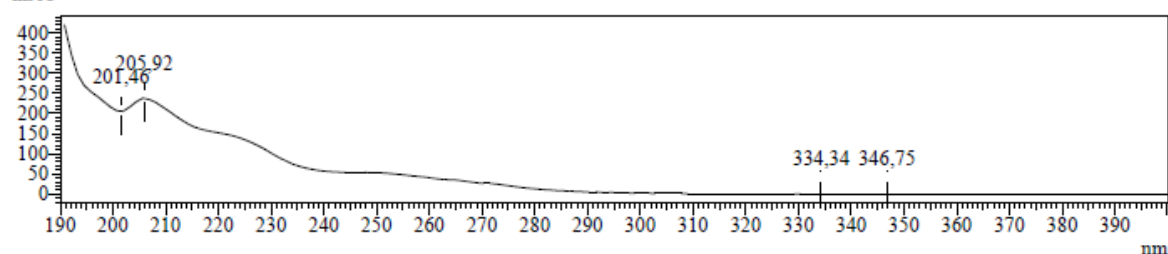

Peak# : 2  
Retention Time : 15,637 min  
Compound Name :  
Spectrum Operation:

mAU

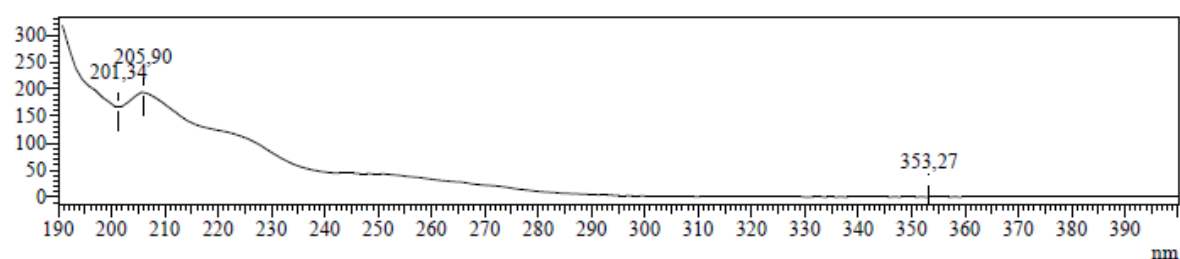

**(S)-(1-(4-chlorophenyl)-2-(diphenylphosphaneyl)ethyl)diphenylphosphine oxide (3ea)**

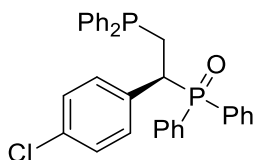

**Following general procedure A:** The reaction was performed with **1e** (0.1 mmol, 1 equiv.), manganese catalyst (0.0025 mmol, 2.5 mol%), *t*PentOK (0.005 mmol, 5 mol%), **2a** (0.105 mmol, 1.05 equiv.), toluene (1.0 mL) at 25°C for 16 h. Product **3ea** was obtained as a white solid after column chromatography (SiO<sub>2</sub>, pentane/ethyl acetate/methanol = 1:1:0.05) [93% yield, 99% ee].

**<sup>1</sup>H NMR (CDCl<sub>3</sub>, 400 MHz):** δ 7.66 – 7.50 (m, 3H, CH<sub>Ar</sub>), 7.49 – 7.41 (m, 3H, CH<sub>Ar</sub>), 7.41 – 7.33 (m, 2H, CH<sub>Ar</sub>), 7.32 – 7.23 (m, 5H, CH<sub>Ar</sub>), 7.22 – 7.09 (m, 11H, CH<sub>Ar</sub>), 3.34 – 3.20 (m, 1H, P(O)Ph<sub>2</sub>CH), 2.91 – 2.69 (m, 1H, PPh<sub>2</sub>CHH), 2.64 – 2.45 (m, 1H, PPh<sub>2</sub>CHH).

**<sup>13</sup>C NMR (CDCl<sub>3</sub>, 101 MHz):** δ 138.4, 138.3, 137.2, 137.0, 134.4, 134.2, 133.3, 133.3, 132.3, 132.0, 131.8, 131.5, 131.4, 131.4, 130.9, 130.8, 130.6, 129.7, 129.0, 128.9, 128.8, 128.6, 128.4, 128.4, 128.3, 128.2, 43.4, 43.3, 42.8, 42.6, 29.1, 28.9. (Due to C–P coupling and the complexity of the spectrum, doublets cannot be assigned and they are listed as singlets)

**<sup>31</sup>P NMR (CDCl<sub>3</sub>, 162 MHz):** δ 33.0 (d, *J* = 31.2 Hz), -19.7 (d, *J* = 31.2 Hz).

**HRMS (ESI, m/z):** calcd. for C<sub>32</sub>H<sub>28</sub>ClOP<sub>2</sub> [M+H]<sup>+</sup>: 525.1298, found: 525.1300.

**HPLC:** Chiracel-ADH, *n*-heptane/*i*-PrOH 80:20, 1.0 mL/min., 40 °C, detection at 206 nm. Retention time (min): 15.3 (minor) and 20.0 (major).

#### <Chromatogram>

mAU

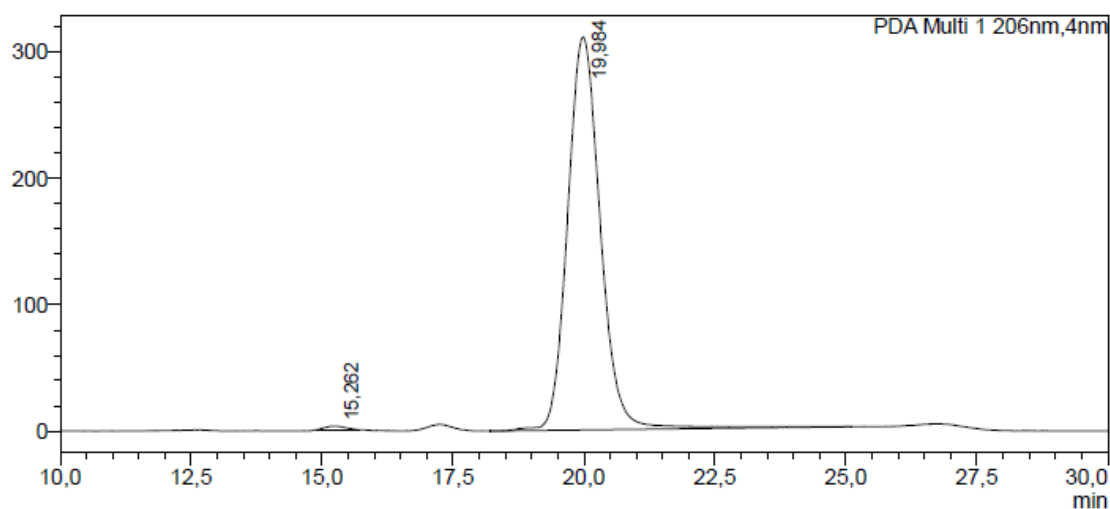

#### <Peak Table>

PDA Ch1 206nm

| Peak# | Ret. Time | Area     | Height | Area%   |
|-------|-----------|----------|--------|---------|
| 1     | 15,262    | 79508    | 2995   | 0,581   |
| 2     | 19,984    | 13596642 | 311115 | 99,419  |
| Total |           | 13676150 | 314109 | 100,000 |



### <Chromatogram>

mAU

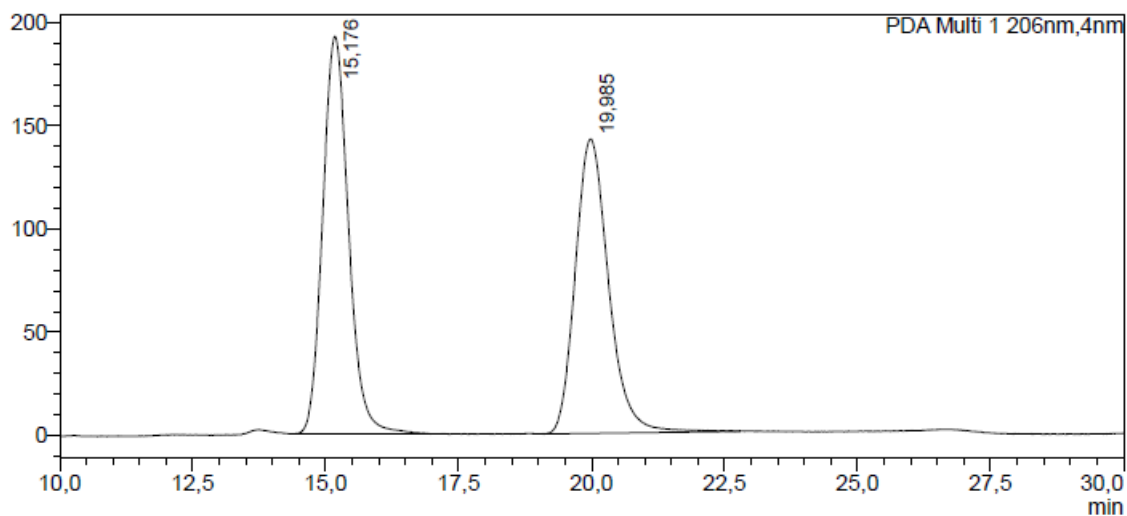

### <Peak Table>

PDA Ch1 206nm

| Peak# | Ret. Time | Area     | Height | Area%   |
|-------|-----------|----------|--------|---------|
| 1     | 15,176    | 6515547  | 192614 | 51,124  |
| 2     | 19,985    | 6229099  | 142709 | 48,876  |
| Total |           | 12744646 | 335322 | 100,000 |

### UV Spectrum

Peak# : 1  
Retention Time : 15,176 min  
Compound Name :  
Spectrum Operation:

mAU

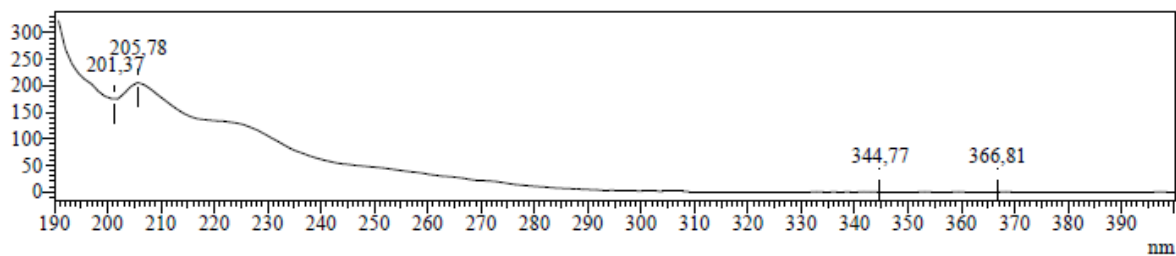

Peak# : 2  
Retention Time : 19,985 min  
Compound Name :  
Spectrum Operation:

mAU

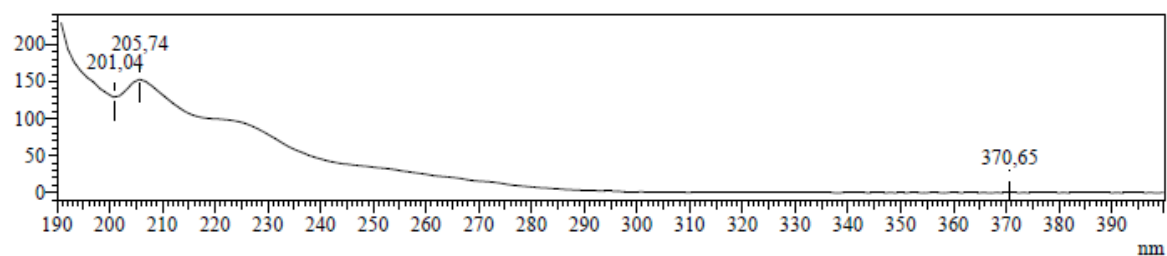

**(S)-2-(2-(diphenylphosphanyl)-1-(4-(trifluoromethyl)phenyl)ethyl)diphenylphosphine oxide (3fa)**

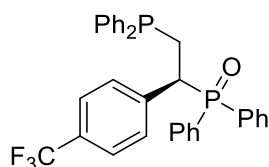

**Following general procedure A:** The reaction was performed with **1f** (0.1 mmol, 1 equiv.), manganese catalyst (0.0025 mmol, 2.5 mol%), *t*PentOK (0.005 mmol, 5 mol%), **2a** (0.105 mmol, 1.05 equiv.), toluene (1.0 mL) at 25°C for 16 h. Product **3fa** was obtained as a white solid after column chromatography (SiO<sub>2</sub>, pentane/ethyl acetate/methanol = 1:1:0.05) [79% yield, 98% ee].

**<sup>1</sup>H NMR (CDCl<sub>3</sub>, 400 MHz):** δ 7.66 – 7.58 (m, 2H, CH<sub>Ar</sub>), 7.59 – 7.51 (m, 1H, CH<sub>Ar</sub>), 7.49 – 7.40 (m, 3H, CH<sub>Ar</sub>), 7.41 – 7.33 (m, 4H, CH<sub>Ar</sub>), 7.33 – 7.19 (m, 7H, CH<sub>Ar</sub>), 7.19 – 7.11 (m, 7H, CH<sub>Ar</sub>), 3.43 – 3.30 (m, 1H, P(O)Ph<sub>2</sub>CH), 2.91 – 2.81 (m, 1H, PPh<sub>2</sub>CHH), 2.60 – 2.53 (m, 1H, PPh<sub>2</sub>CHH).

**<sup>13</sup>C NMR (CDCl<sub>3</sub>, 101 MHz):** δ 139.8, 138.2, 138.0, 137.1, 136.9, 134.3, 134.1, 132.2, 132.2, 132.1, 131.9, 131.7, 131.6, 131.4, 131.4, 131.3, 131.1, 131.1, 130.8, 130.8, 130.4, 130.3, 129.8, 129.6, 129.6, 129.3, 129.3, 129.1, 128.9, 128.9, 128.4, 128.4, 128.4, 128.3, 128.2, 125.6, 125.3, 125.3, 125.3, 125.2, 125.2, 122.9, 44.1, 44.0, 43.5, 43.3, 28.9, 28.7. (Due to C–P and C–F coupling and the complexity of the spectrum, doublets cannot be assigned and they are listed as singlets)

**<sup>31</sup>P NMR (CDCl<sub>3</sub>, 162 MHz):** δ 33.0 (dd, *J* = 31.9, 2.3 Hz), -19.2 (d, *J* = 31.9 Hz).

**<sup>19</sup>F NMR (CDCl<sub>3</sub>, 376 MHz):** δ -62.5.

**HRMS (ESI, m/z):** calcd. for C<sub>33</sub>H<sub>28</sub>F<sub>3</sub>OP<sub>2</sub> [M+H]<sup>+</sup>: 559.1562, found: 559.1559.

**HPLC:** Chiracel-ADH, *n*-heptane/*i*-PrOH 80:20, 1.0 mL/min., 40 °C, detection at 254 nm. Retention time (min): 12.4 (minor) and 15.0 (major).

#### <Chromatogram>

mAU

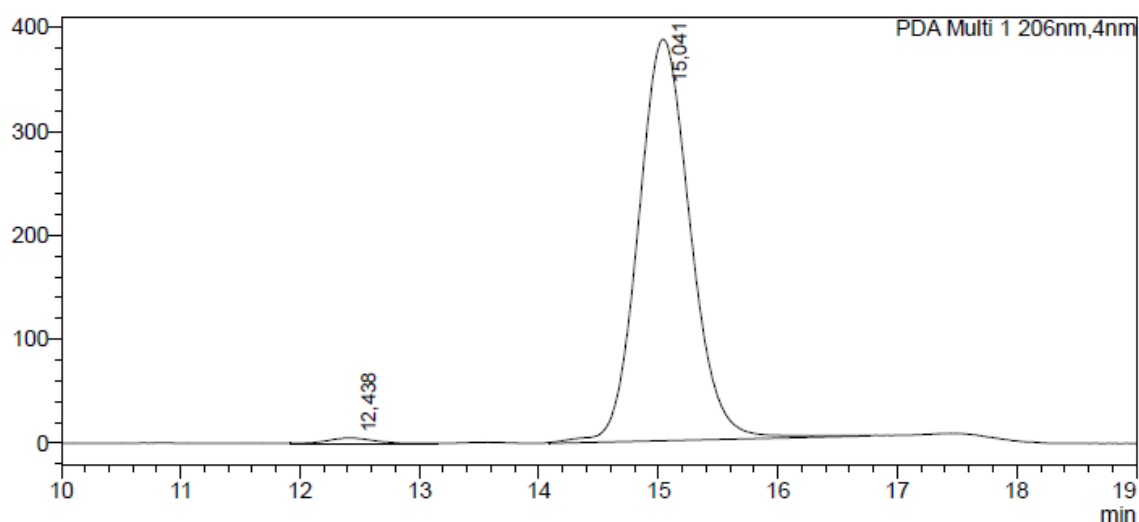

#### <Peak Table>

PDA Ch1 206nm

| Peak# | Ret. Time | Area     | Height | Area%   |
|-------|-----------|----------|--------|---------|
| 1     | 12,438    | 140156   | 5315   | 1,184   |
| 2     | 15,041    | 11695299 | 386342 | 98,816  |
| Total |           | 11835455 | 391657 | 100,000 |

### <Chromatogram>

mAU

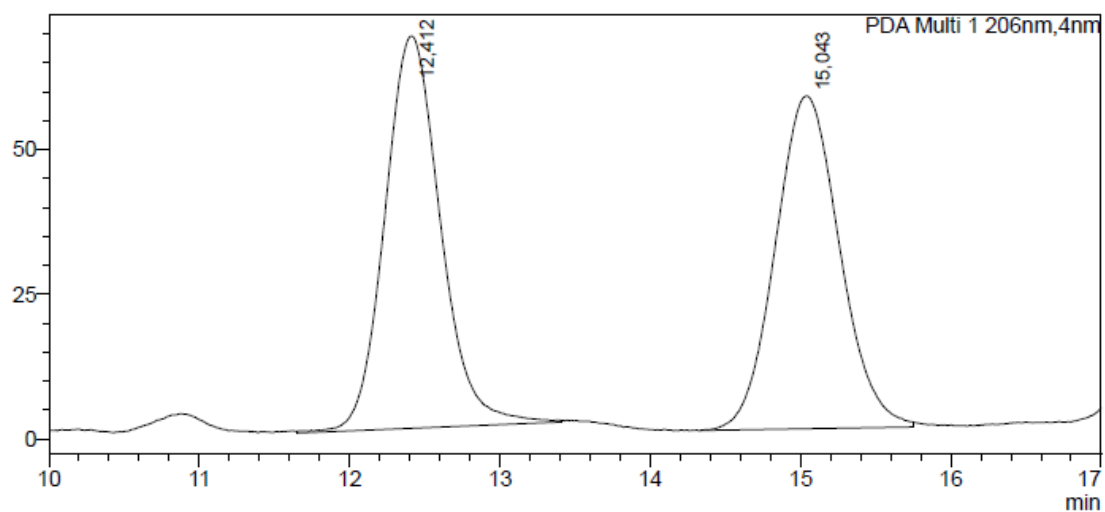

### <Peak Table>

PDA Ch1 206nm

| Peak# | Ret. Time | Area    | Height | Area%   |
|-------|-----------|---------|--------|---------|
| 1     | 12,412    | 1753010 | 67795  | 50,522  |
| 2     | 15,043    | 1716814 | 57535  | 49,478  |
| Total |           | 3469824 | 125330 | 100,000 |

### UV Spectrum

Peak# : 1  
Retention Time : 12,409 min  
Compound Name :  
Spectrum Operation:

mAU

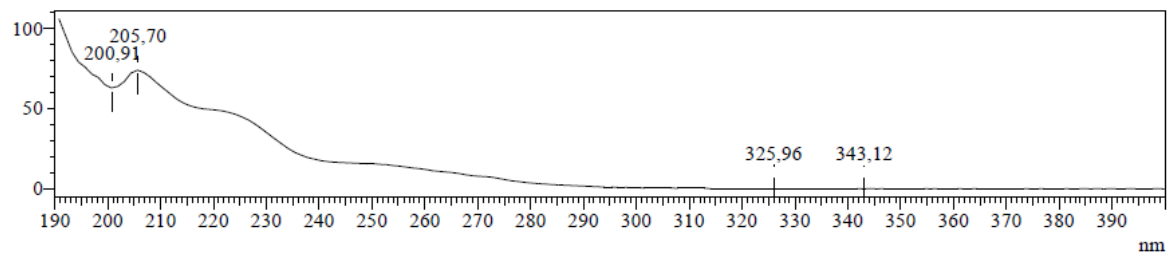

Peak# : 2  
Retention Time : 15,042 min  
Compound Name :  
Spectrum Operation:

mAU

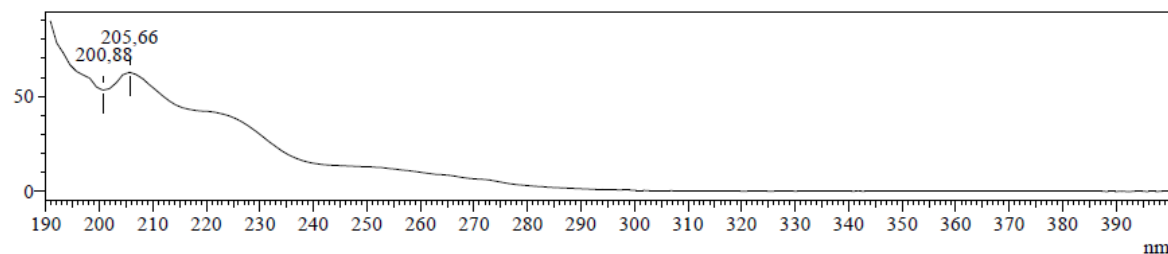

**(S)-1-([1,1'-biphenyl]-4-yl)-2-(diphenylphosphanyl)ethyl)diphenylphosphine oxide (3ga)**

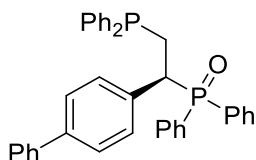

**Following general procedure A:** The reaction was performed with **1g** (0.1 mmol, 1 equiv.), manganese catalyst (0.0025 mmol, 2.5 mol%), *t*PentOK (0.005 mmol, 5 mol%), **2a** (0.105 mmol, 1.05 equiv.), toluene (1.0 mL) at 25°C for 16 h. Product **3ga** was obtained as a white solid after column chromatography (SiO<sub>2</sub>, pentane/ethyl acetate/methanol = 1:1:0.05) [95% yield, 94% ee].

**<sup>1</sup>H NMR (CDCl<sub>3</sub>, 400 MHz):** δ 7.66 – 7.57 (m, 2H, CH<sub>Ar</sub>), 7.56 – 7.50 (m, 3H, CH<sub>Ar</sub>), 7.49 – 7.09 (m, 24H, CH<sub>Ar</sub>), 3.43 – 3.26 (m, 1H, P(O)Ph<sub>2</sub>CH), 2.99 – 2.82 (m, 1H, PPh<sub>2</sub>CHH), 2.67 – 2.51 (m, 1H, PPh<sub>2</sub>CHH).

**<sup>13</sup>C NMR (CDCl<sub>3</sub>, 101 MHz):** δ 143.4, 142.6, 142.6, 141.2, 141.1, 140.0, 139.8, 137.0, 137.0, 137.0, 136.9, 136.9, 136.8, 135.1, 135.1, 134.6, 134.5, 134.4, 134.4, 134.3, 134.1, 134.1, 134.0, 134.0, 133.9, 133.9, 133.6, 133.5, 133.4, 133.0, 133.0, 132.2, 131.4, 131.4, 131.3, 131.3, 130.9, 130.8, 130.7, 130.6, 130.5, 129.8, 129.6, 46.2, 46.1, 45.6, 45.4, 31.6, 31.4. (Due to C–P coupling and the complexity of the spectrum, doublets cannot be assigned and they are listed as singlets)

**<sup>31</sup>P NMR (CDCl<sub>3</sub>, 162 MHz):** δ 30.4 (d, *J* = 32.2 Hz), -22.3 (d, *J* = 32.2 Hz).

**HRMS (ESI, m/z):** calcd. for C<sub>32</sub>H<sub>28</sub>ClOP<sub>2</sub> [M+H]<sup>+</sup>: 567.2001, found: 567.2001.

**HPLC:** Chiracel-ADH, *n*-heptane/*i*-PrOH 80:20, 1.0 mL/min., 40 °C, detection at 208 nm.

Retention time (min): 22.7 (minor) and 31.8 (major).

**<Chromatogram>**

mAU

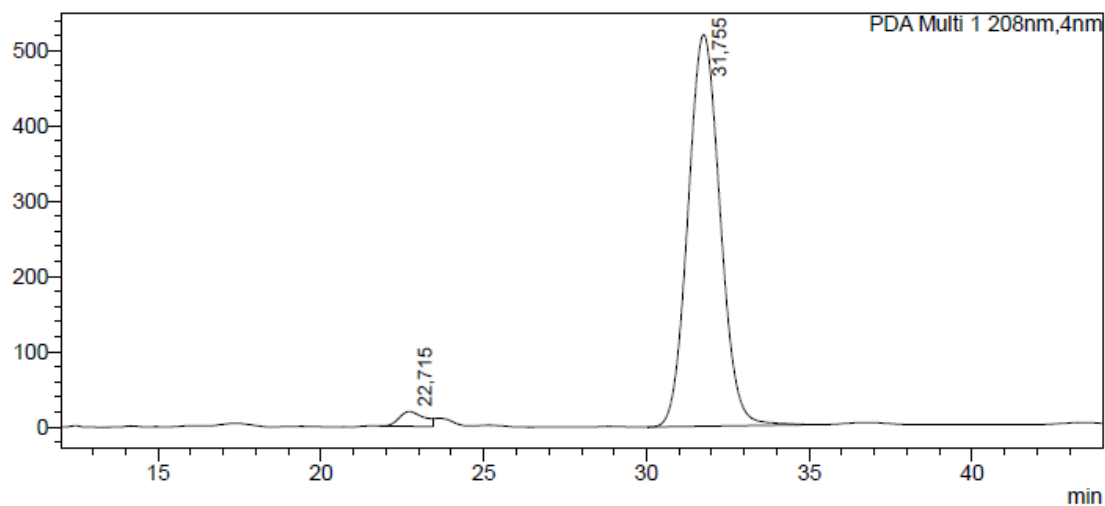

**<Peak Table>**

PDA Ch1 208nm

| Peak# | Ret. Time | Area     | Height | Area%   |
|-------|-----------|----------|--------|---------|
| 1     | 22,715    | 1038027  | 19500  | 2,832   |
| 2     | 31,755    | 35611992 | 519888 | 97,168  |
| Total |           | 36650019 | 539388 | 100,000 |

### <Chromatogram>

mAU

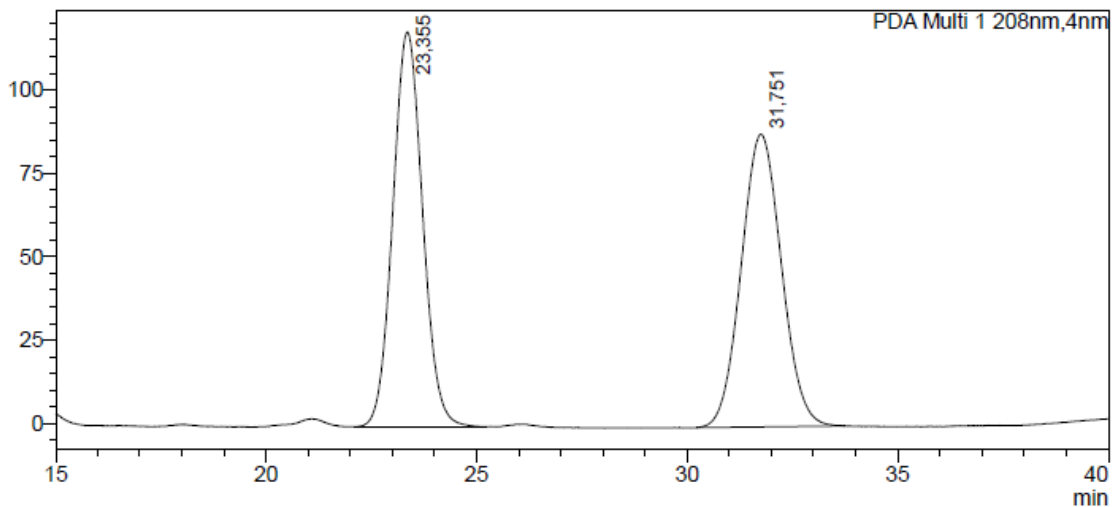

### <Peak Table>

PDA Ch1 208nm

| Peak# | Ret. Time | Area     | Height | Area%   |
|-------|-----------|----------|--------|---------|
| 1     | 23,355    | 5827516  | 118274 | 49,970  |
| 2     | 31,751    | 5834400  | 87708  | 50,030  |
| Total |           | 11661916 | 205982 | 100,000 |

### UV Spectrum

Peak# : 1  
Retention Time : 23,355 min  
Compound Name :  
Spectrum Operation:

mAU

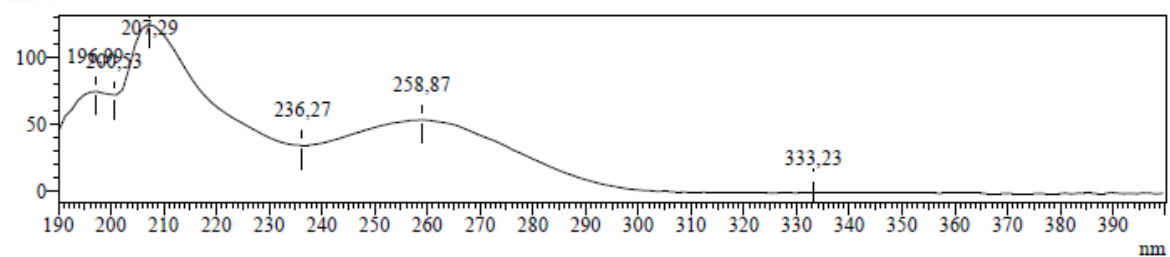

Peak# : 2  
Retention Time : 31,751 min  
Compound Name :  
Spectrum Operation:

mAU

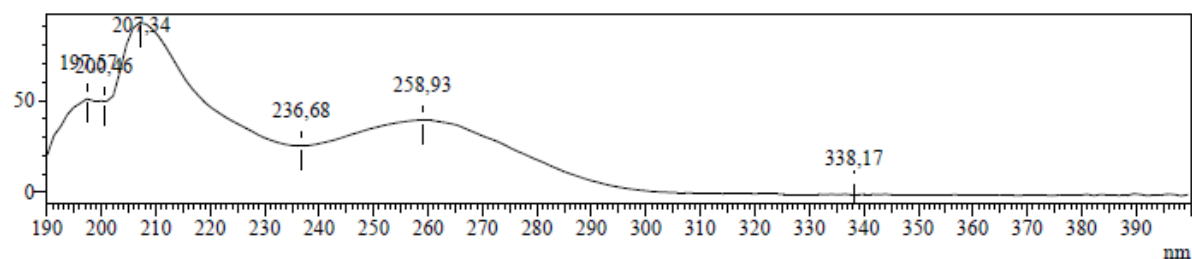

**methyl (S)-4-(2-(diphenylphosphanyl)-1-(diphenylphosphoryl)ethyl)benzoate (3ha)**

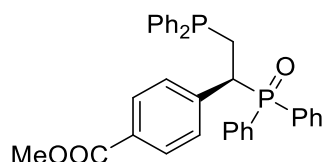

**Following general procedure A:** The reaction was performed with **1h** (0.1 mmol, 1 equiv.), manganese catalyst (0.005 mmol, 5 mol%), *t*PentOK (0.01 mmol, 10 mol%), **2a** (0.105 mmol, 1.05 equiv.), toluene (1.0 mL) at 25°C for 16 h. Product **3ha** was obtained as a white solid after column chromatography (SiO<sub>2</sub>, pentane/ethyl acetate/methanol = 1:1:0.05) [91% yield, 96% ee].

**<sup>1</sup>H NMR (CDCl<sub>3</sub>, 400 MHz):** δ 7.83 (d, *J* = 8.1 Hz, 2H, CH<sub>Ar</sub>), 7.65 – 7.56 (m, 2H, CH<sub>Ar</sub>), 7.55 – 7.49 (m, 1H, CH<sub>Ar</sub>), 7.47 – 7.39 (m, 3H, CH<sub>Ar</sub>), 7.39 – 7.32 (m, 2H, CH<sub>Ar</sub>), 7.31 – 7.20 (m, 7H, CH<sub>Ar</sub>), 7.18 – 7.07 (m, 7H, CH<sub>Ar</sub>), 3.86 (s, 3H, COOCH<sub>3</sub>), 3.44 – 3.25 (m, 1H, P(O)Ph<sub>2</sub>CH), 2.95 – 2.76 (m, 1H, PPh<sub>2</sub>CHH), 2.64 – 2.46 (m, 1H, PPh<sub>2</sub>CHH).

**<sup>13</sup>C NMR (CDCl<sub>3</sub>, 101 MHz):** δ 166.9, 141.0, 141.0, 141.0, 141.0, 138.3, 138.2, 136.9, 136.7, 134.3, 134.1, 132.0, 131.9, 131.8, 131.6, 131.5, 131.4, 131.3, 131.2, 131.0, 131.0, 130.8, 130.7, 130.4, 130.0, 130.0, 129.7, 129.6, 129.5, 129.0, 129.0, 128.9, 128.8, 128.8, 128.7, 128.3, 128.2, 128.1, 128.1, 128.0, 52.0, 44.0, 43.9, 43.4, 43.3, 29.7. (Due to C–P coupling and the complexity of the spectrum, doublets cannot be assigned and they are listed as singlets)

**<sup>31</sup>P NMR (CDCl<sub>3</sub>, 162 MHz):** δ 29.8 (d, *J* = 30.7 Hz), -22.6 (d, *J* = 30.7 Hz).

**HRMS (ESI, *m/z*):** calcd. for C<sub>34</sub>H<sub>31</sub>O<sub>3</sub>P<sub>2</sub> [M+H]<sup>+</sup>: 549.1743, found: 549.1743.

**HPLC:** Chiracel-ADH, *n*-heptane/*i*-PrOH 80:20, 1.0 mL/min., 40 °C, detection at 206 nm. Retention time (min): 25.2 (minor) and 30.5 (major).

#### <Chromatogram>

mAU

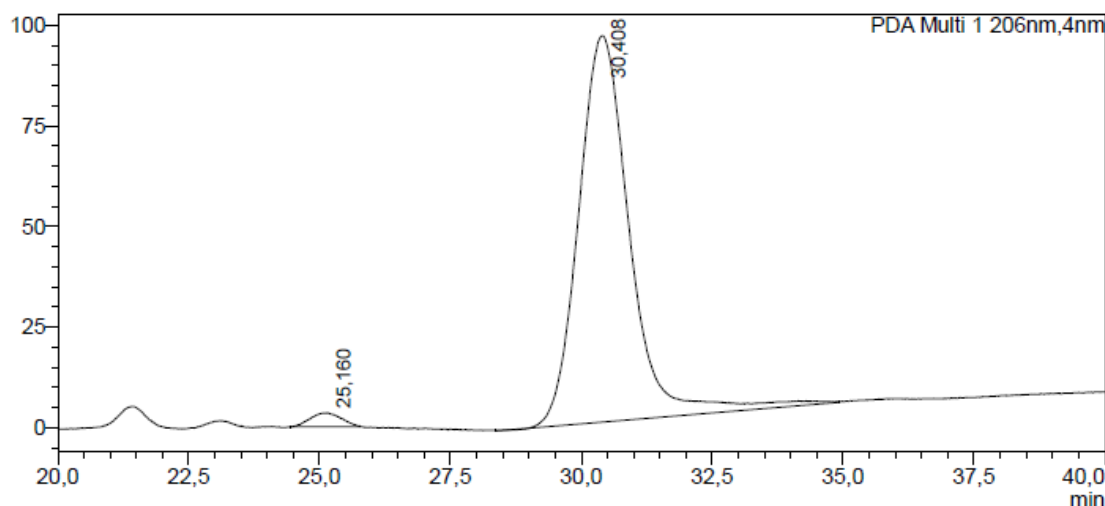

#### <Peak Table>

PDA Ch1 206nm

| Peak# | Ret. Time | Area    | Height | Area%   |
|-------|-----------|---------|--------|---------|
| 1     | 25,160    | 142695  | 3407   | 2,135   |
| 2     | 30,408    | 6542425 | 95983  | 97,865  |
| Total |           | 6685120 | 99390  | 100,000 |

### <Chromatogram>

mAU

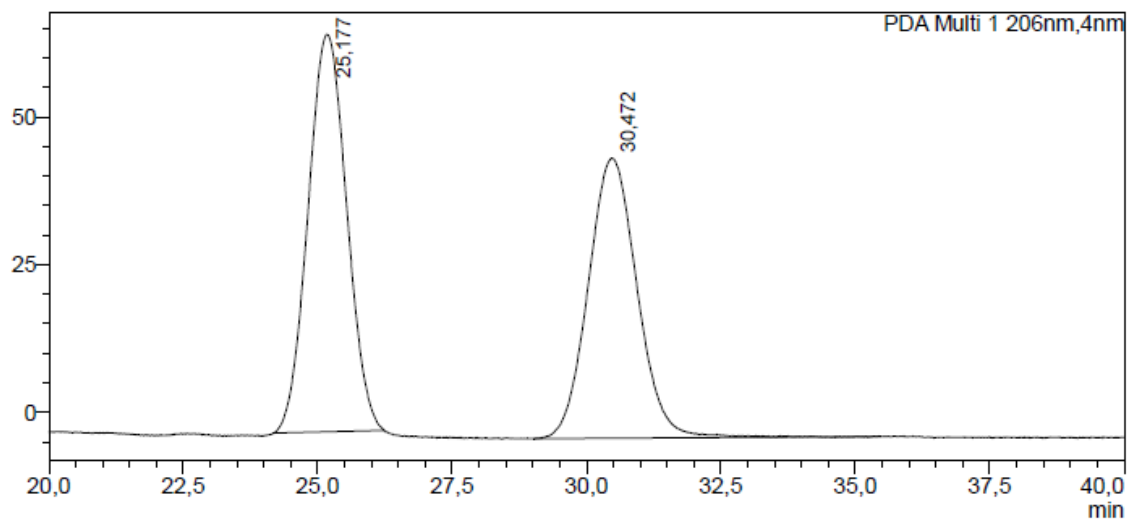

### <Peak Table>

PDA Ch1 206nm

| Peak# | Ret. Time | Area    | Height | Area%   |
|-------|-----------|---------|--------|---------|
| 1     | 25,177    | 3366953 | 67260  | 52,908  |
| 2     | 30,472    | 2996800 | 47467  | 47,092  |
| Total |           | 6363753 | 114726 | 100,000 |

### UV Spectrum

Peak# : 1  
Retention Time : 25,177 min  
Compound Name :  
Spectrum Operation:

mAU

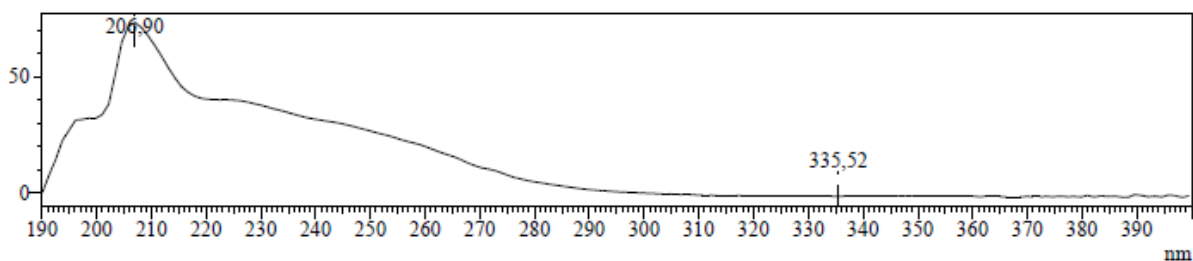

Peak# : 2  
Retention Time : 30,472 min  
Compound Name :  
Spectrum Operation:

mAU

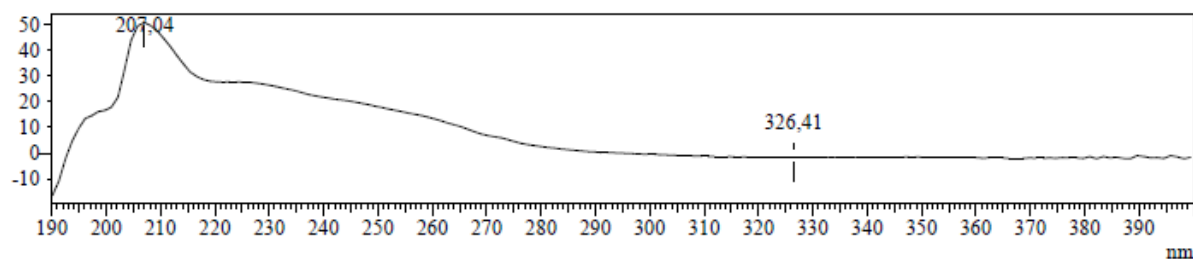

**(S)-2-(diphenylphosphanyl)-1-(m-tolyl)ethyl)diphenylphosphine oxide (3ia)**

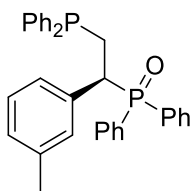

**Following general procedure A:** The reaction was performed with **1i** (0.1 mmol, 1 equiv.), manganese catalyst (0.0025 mmol, 2.5 mol%), *t*PentOK (0.005 mmol, 5 mol%), **2a** (0.105 mmol, 1.05 equiv.), toluene (1.0 mL) at 25°C for 16 h. Product **3ia** was obtained as a white solid after column chromatography (SiO<sub>2</sub>, pentane/ethyl acetate/methanol = 1:1:0.05) [81% yield, >99% ee].

**<sup>1</sup>H NMR (CDCl<sub>3</sub>, 400 MHz):** δ 7.62 – 7.51 (m, 3H, CH<sub>Ar</sub>), 7.46 – 7.15 (m, 17H, CH<sub>Ar</sub>), 7.09 – 6.96 (m, 4H, CH<sub>Ar</sub>), 3.29 – 3.22 (m, 1H, P(O)Ph<sub>2</sub>CH), 2.92 – 2.82 (m, 1H, PPh<sub>2</sub>CHH), 2.59 – 2.53 (m, 1H, PPh<sub>2</sub>CHH), 2.23 (s, 3H, PhCH<sub>3</sub>).

**<sup>13</sup>C NMR (CDCl<sub>3</sub>, 100 MHz):** δ 138.8, 138.7, 137.9, 137.4, 137.3, 135.0, 134.5, 134.3, 132.6, 132.0, 131.8, 131.5, 131.4, 131.2, 131.1, 131.0, 130.7, 129.6, 128.8, 128.8, 128.7, 128.3, 128.2, 128.1, 128.0, 127.8, 127.2, 43.8, 43.0, 28.9, 28.7, 21.5. (Due to C–P coupling and the complexity of the spectrum, doublets cannot be assigned and they are listed as singlets)

**<sup>31</sup>P NMR (162 MHz, CDCl<sub>3</sub>):** δ 30.5 (d, *J* = 32.2 Hz), -22.6 (d, *J* = 32.2 Hz).

**HRMS (ESI, *m/z*):** calcd. for C<sub>33</sub>H<sub>31</sub>OP<sub>2</sub> [M+H]<sup>+</sup>: 505.1845, found: 505.1845.

**HPLC:** Chiracel-ADH, *n*-heptane/*i*-PrOH 80:20, 1.0 mL/min., 40 °C, detection at 254 nm. Retention time (min): 8.6 (minor) and 10.3 (major).

#### <Chromatogram>

mAU

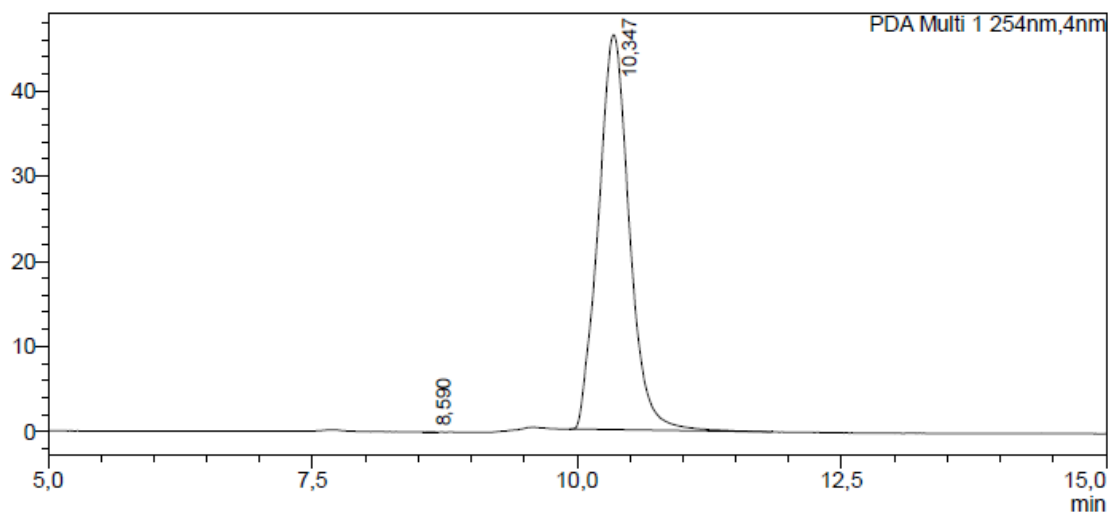

#### <Peak Table>

PDA Ch1 254nm

| Peak# | Ret. Time | Area   | Height | Area%   |
|-------|-----------|--------|--------|---------|
| 1     | 8,590     | 63     | 21     | 0,007   |
| 2     | 10,347    | 946115 | 46379  | 99,993  |
| Total |           | 946177 | 46400  | 100,000 |



### <Chromatogram>

mAU

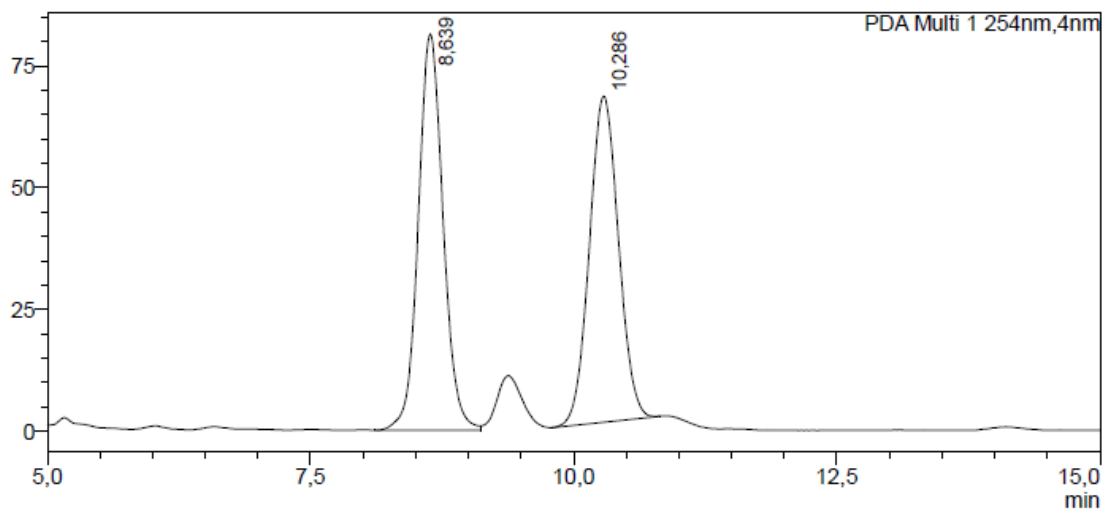

### <Peak Table>

PDA Ch1 254nm

| Peak# | Ret. Time | Area    | Height | Area%   |
|-------|-----------|---------|--------|---------|
| 1     | 8,639     | 1334281 | 81263  | 50,886  |
| 2     | 10,286    | 1287818 | 66900  | 49,114  |
| Total |           | 2622098 | 148162 | 100,000 |

### UV Spectrum

Peak# : 1  
Retention Time : 8,639 min  
Compound Name :  
Spectrum Operation:

mAU

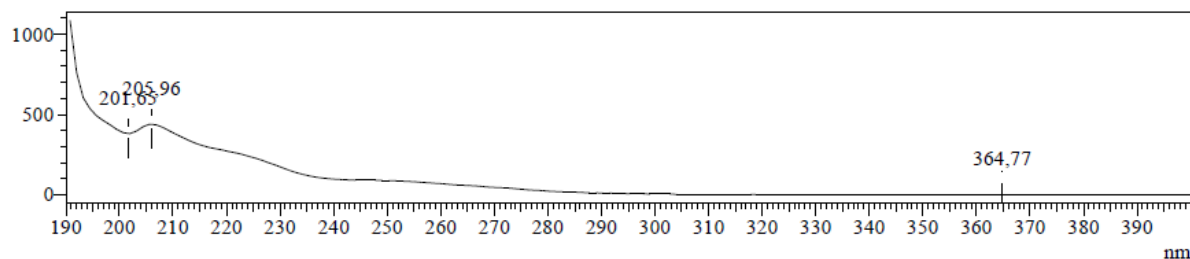

Peak# : 2  
Retention Time : 10,286 min  
Compound Name :  
Spectrum Operation:

mAU

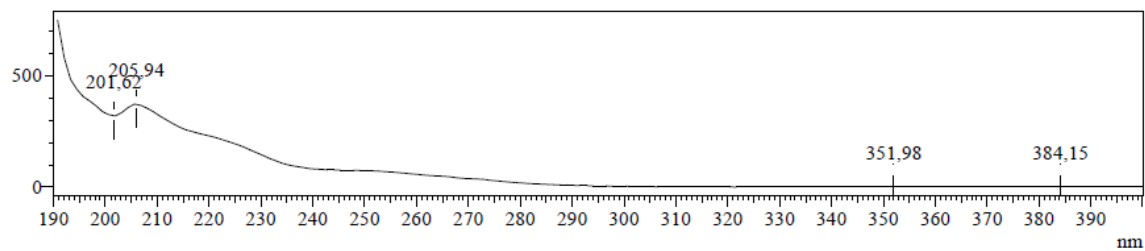

**(S)-(1-(3-chlorophenyl)-2-(diphenylphosphaneyl)ethyl)diphenylphosphine oxide (3ja)**

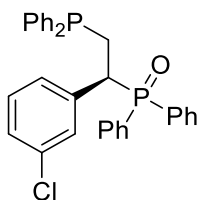

**Following general procedure A:** The reaction was performed with **1j** (0.1 mmol, 1 equiv.), manganese catalyst (0.0025 mmol, 2.5 mol%), *t*PentOK (0.005 mmol, 5 mol%), **2a** (0.105 mmol, 1.05 equiv.), toluene (1.0 mL) at 25°C for 16 h. Product **3ja** was obtained as a white solid after column chromatography (SiO<sub>2</sub>, pentane/ethyl acetate/methanol = 1:1:0.05) [90% yield, 97% ee].

**<sup>1</sup>H NMR (CDCl<sub>3</sub>, 400 MHz):** δ 7.63 – 7.49 (m, 3H, CH<sub>Ar</sub>), 7.47 – 7.40 (m, 3H, CH<sub>Ar</sub>), 7.39 – 7.32 (m, 2H, CH<sub>Ar</sub>), 7.31 – 7.21 (m, 5H, CH<sub>Ar</sub>), 7.21 – 7.07 (m, 11H, CH<sub>Ar</sub>), 3.36 – 3.11 (m, 1H, P(O)Ph<sub>2</sub>CH), 2.88 – 2.72 (m, 1H, PPh<sub>2</sub>CHH), 2.61 – 2.44 (m, 1H, PPh<sub>2</sub>CHH).

**<sup>13</sup>C NMR (CDCl<sub>3</sub>, 101 MHz):** δ 138.4, 138.3, 137.7, 137.6, 137.6, 137.6, 137.2, 137.0, 134.4, 134.2, 132.2, 132.2, 132.1, 132.0, 132.0, 131.8, 131.6, 131.6, 131.4, 131.4, 131.2, 131.2, 130.9, 130.9, 130.5, 130.2, 130.2, 129.7, 129.6, 129.6, 129.0, 128.9, 128.9, 128.8, 128.4, 128.3, 128.2, 128.2, 128.1, 127.6, 127.6, 43.8, 43.7, 43.2, 43.0, 28.9, 28.9, 28.7, 28.7. (Due to C–P coupling and the complexity of the spectrum, doublets cannot be assigned and they are listed as singlets)

**<sup>31</sup>P NMR (CDCl<sub>3</sub>, 162 MHz):** δ 30.1 (d, *J* = 31.3 Hz), -22.5 (d, *J* = 31.3 Hz).

**HRMS (ESI, m/z):** calcd. for C<sub>32</sub>H<sub>28</sub>ClOP<sub>2</sub> [M+H]<sup>+</sup>: 525.1298, found: 525.1295.

**HPLC:** Chiracel-ADH, *n*-heptane/*i*-PrOH 80:20, 1.0 mL/min., 40 °C, detection at 206 nm. Retention time (min): 11.3 (minor) and 15.3 (major).

#### <Chromatogram>

mAU

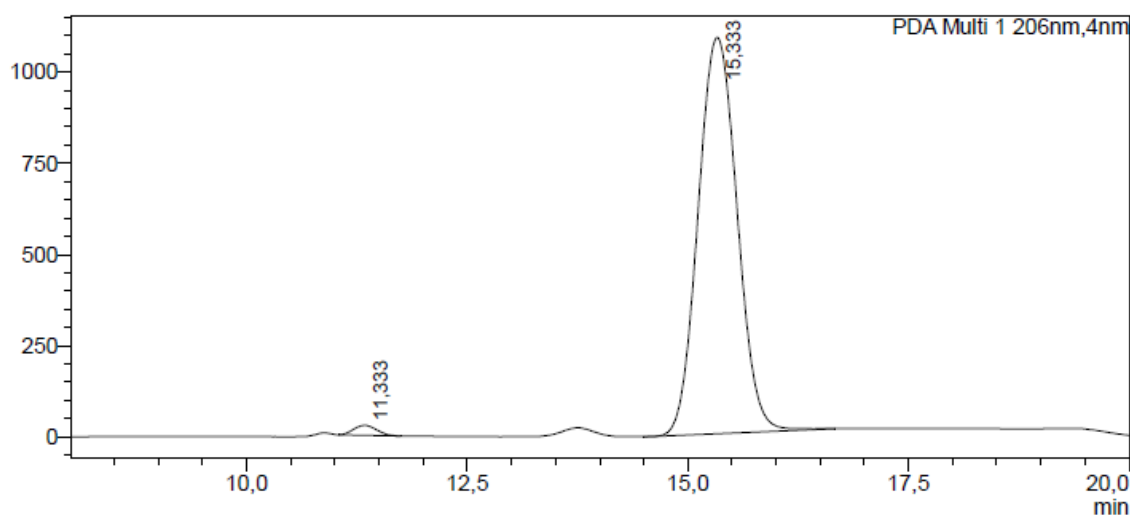

#### <Peak Table>

PDA Ch1 206nm

| Peak# | Ret. Time | Area     | Height  | Area%   |
|-------|-----------|----------|---------|---------|
| 1     | 11.333    | 490156   | 27016   | 1.442   |
| 2     | 15.333    | 33497677 | 1086535 | 98.558  |
| Total |           | 33987832 | 1113551 | 100.000 |

### <Chromatogram>

mAU

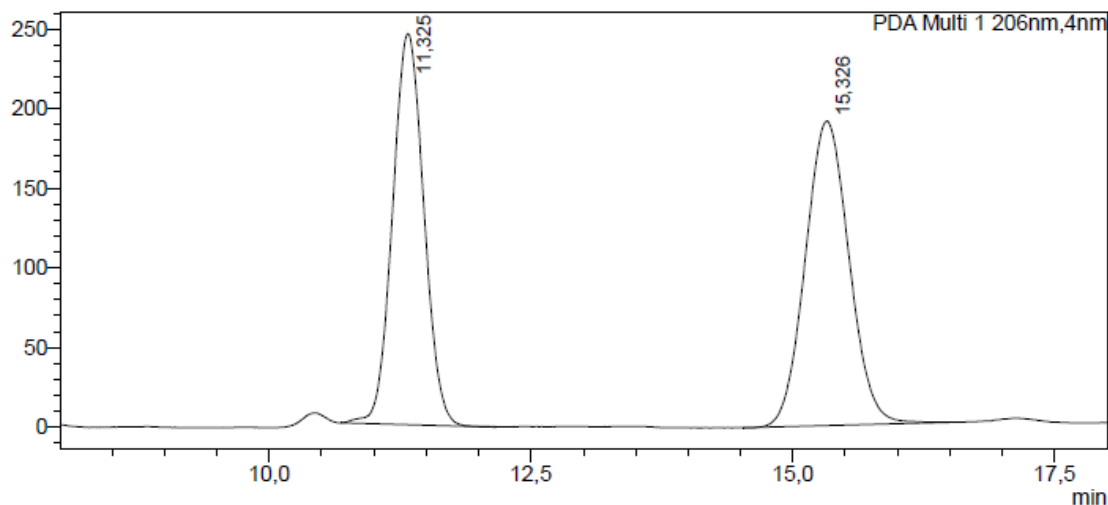

### <Peak Table>

PDA Ch1 206nm

| Peak# | Ret. Time | Area     | Height | Area%   |
|-------|-----------|----------|--------|---------|
| 1     | 11,325    | 5116666  | 245728 | 47,927  |
| 2     | 15,326    | 5559394  | 191201 | 52,073  |
| Total |           | 10676060 | 436929 | 100,000 |

UV Spectrum

Peak# : 1  
Retention Time : 11,325 min  
Compound Name :  
Spectrum Operation:

mAU

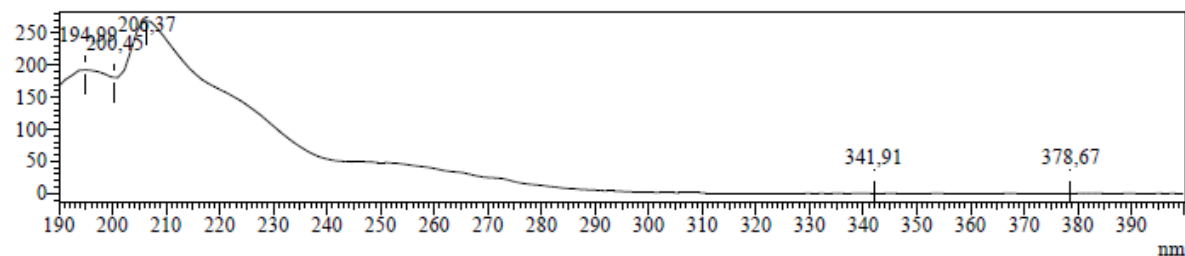

Peak# : 2  
Retention Time : 15,326 min  
Compound Name :  
Spectrum Operation:

mAU

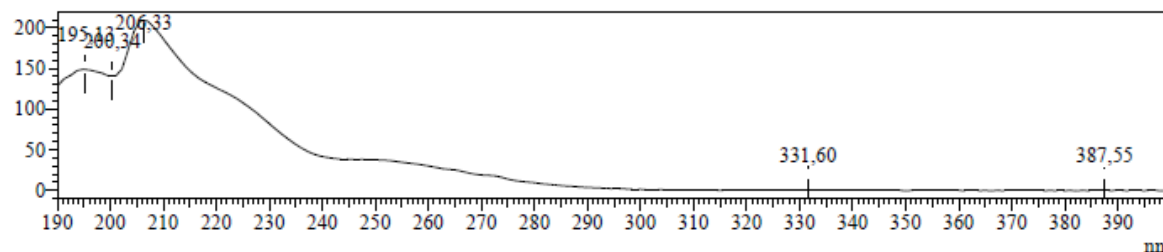

**(S)-2-(2-(diphenylphosphanyl)-1-(3-methoxyphenyl)ethyl)diphenylphosphine oxide (3ka)**

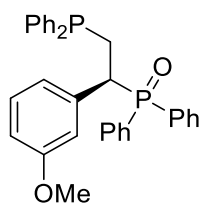

**Following general procedure A:** The reaction was performed with **1k** (0.1 mmol, 1 equiv.), manganese catalyst (0.0025 mmol, 2.5 mol%), barton's base (0.005 mmol, 5 mol%), **2a** (0.105 mmol, 1.05 equiv.), toluene (1.0 mL) at 25°C for 48 h. Product **3ka** was obtained as a white solid after column chromatography (SiO<sub>2</sub>, pentane/ethyl acetate/methanol = 1:1:0.05) [82% yield, 97% ee].

**<sup>1</sup>H NMR (CDCl<sub>3</sub>, 400 MHz):** δ 7.64 – 7.49 (m, 3H, CH<sub>Ar</sub>), 7.49 – 7.38 (m, 3H, CH<sub>Ar</sub>), 7.39 – 7.24 (m, 7H, CH<sub>Ar</sub>), 7.21 – 7.13 (m, 7H, CH<sub>Ar</sub>), 7.12 – 7.08 (m, 1H, CH<sub>Ar</sub>), 6.85 – 6.67 (m, 3H, CH<sub>Ar</sub>), 3.69 (s, 3H, OCH<sub>3</sub>), 3.32 – 3.16 (m, 1H, P(O)Ph<sub>2</sub>CH), 2.92 – 2.78 (m, 1H, PPh<sub>2</sub>CHH), 2.61 – 2.48 (m, 1H, PPh<sub>2</sub>CHH).

**<sup>13</sup>C NMR (CDCl<sub>3</sub>, 101 MHz):** δ 159.4, 138.7, 138.6, 137.3, 137.2, 136.8, 136.8, 136.7, 136.7, 134.4, 134.4, 134.2, 132.4, 132.4, 131.8, 131.8, 131.7, 131.7, 131.5, 131.4, 131.4, 131.3, 131.2, 131.2, 130.9, 130.8, 130.7, 129.5, 129.2, 129.2, 128.8, 128.7, 128.6, 128.6, 128.2, 128.1, 128.0, 128.0, 127.8, 122.6, 122.5, 115.2, 115.1, 113.4, 113.4, 55.1, 43.9, 43.7, 43.2, 43.1, 28.9, 28.9, 28.8, 28.7. (Due to C–P coupling and the complexity of the spectrum, doublets cannot be assigned and they are listed as singlets)

**<sup>31</sup>P NMR (CDCl<sub>3</sub>, 162 MHz):** δ 33.3 (d, *J* = 31.8 Hz), -19.6 (d, *J* = 31.8 Hz).

**HRMS (ESI, m/z):** calcd. for C<sub>33</sub>H<sub>31</sub>O<sub>2</sub>P<sub>2</sub> [M+H]<sup>+</sup>: 521.1794, found: 521.1786.

**HPLC:** Chiracel-ADH, *n*-heptane/*i*-PrOH 80:20, 1.0 mL/min., 40 °C, detection at 207 nm. Retention time (min): 16.0 (minor) and 21.4 (major).

#### <Chromatogram>

mAU

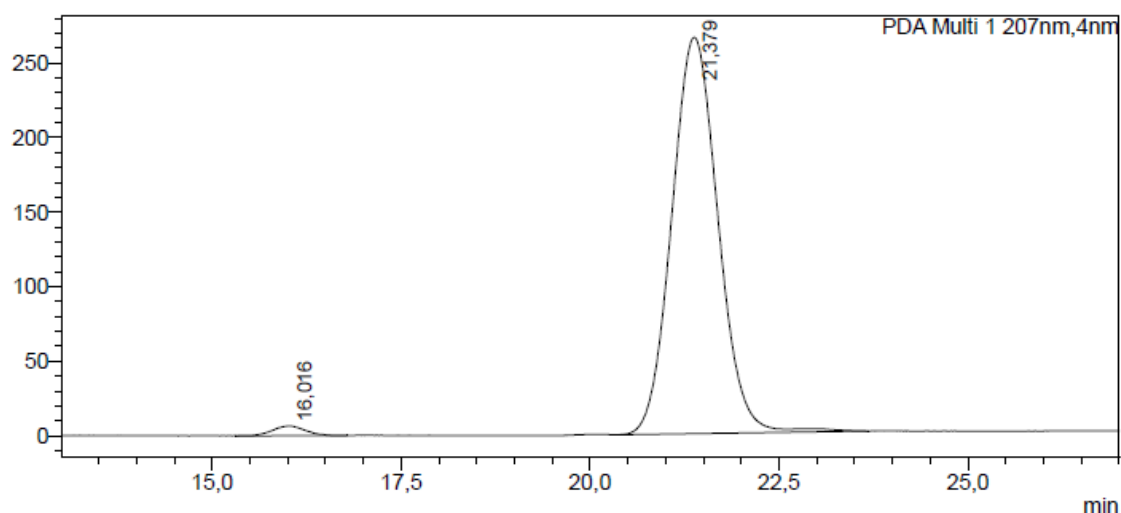

#### <Peak Table>

PDA Ch1 207nm

| Peak# | Ret. Time | Area     | Height | Area%   |
|-------|-----------|----------|--------|---------|
| 1     | 16,016    | 196599   | 6460   | 1,707   |
| 2     | 21,379    | 11317547 | 265676 | 98,293  |
| Total |           | 11514146 | 272136 | 100,000 |

### <Chromatogram>

mAU

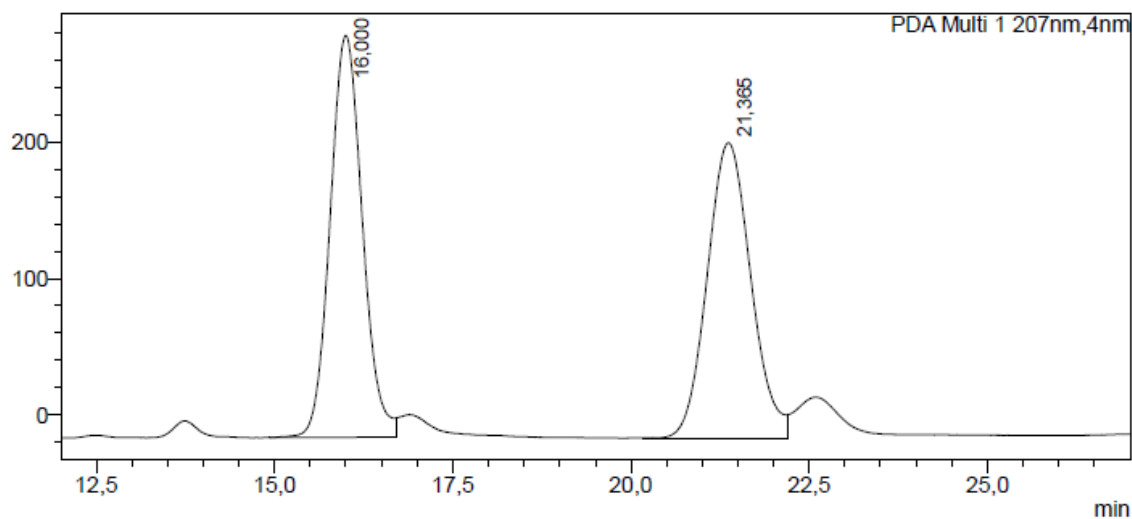

### <Peak Table>

PDA Ch1 207nm

| Peak# | Ret. Time | Area     | Height | Area%   |
|-------|-----------|----------|--------|---------|
| 1     | 16,000    | 9264584  | 294327 | 50,097  |
| 2     | 21,365    | 9228832  | 216349 | 49,903  |
| Total |           | 18493416 | 510676 | 100,000 |

UV Spectrum

Peak# : 1  
Retention Time : 16,000 min  
Compound Name :  
Spectrum Operation:

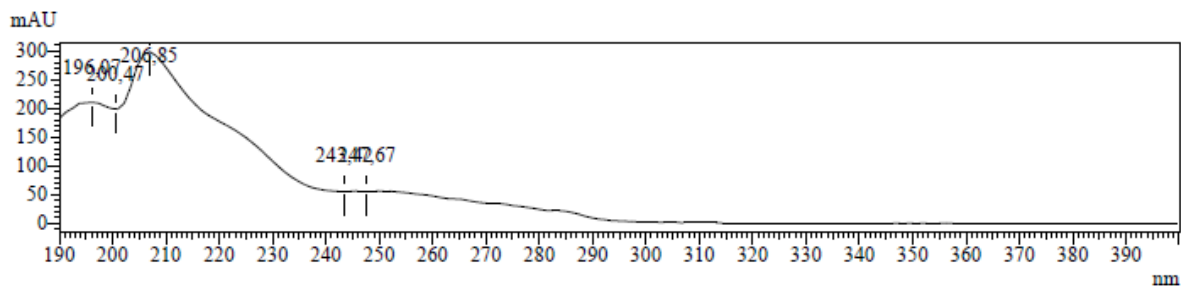

Peak# : 2  
Retention Time : 21,365 min  
Compound Name :  
Spectrum Operation:

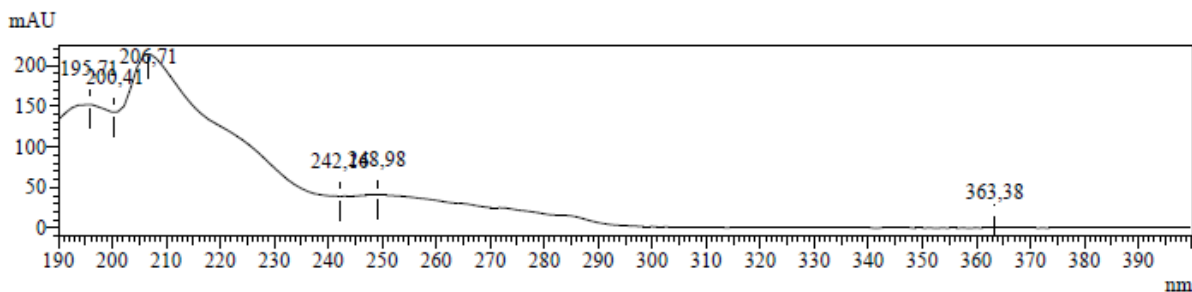

**(S)-2-(diphenylphosphanyl)-1-(2-fluorophenyl)ethyl)diphenylphosphine oxide (3la)**

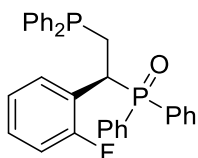

**Following general procedure A:** The reaction was performed with **11** (0.1 mmol, 1 equiv.), manganese catalyst (0.0025 mmol, 2.5 mol%), *t*PentOK (0.005 mmol, 5 mol%), **2a** (0.105 mmol, 1.05 equiv.), toluene (1.0 mL) at 25°C for 16 h. Product **31a** was obtained as a white solid after column chromatography (SiO<sub>2</sub>, pentane/ethyl acetate/methanol = 1:1:0.05) [94% yield, 93% ee].

**<sup>1</sup>H NMR (CDCl<sub>3</sub>, 400 MHz):** δ 7.94 – 7.72 (m, 1H, CH<sub>Ar</sub>), 7.62 – 7.48 (m, 3H, CH<sub>Ar</sub>), 7.49 – 7.07 (m, 19H, CH<sub>Ar</sub>), 6.85 – 6.71 (m, 1H, CH<sub>Ar</sub>), 3.92 – 3.74 (m, 1H, P(O)Ph<sub>2</sub>CH), 2.92 – 2.73 (m, 1H, PPh<sub>2</sub>CHH), 2.63 – 2.45 (m, 1H, PPh<sub>2</sub>CHH).

**<sup>13</sup>C NMR (CDCl<sub>3</sub>, 101 MHz):** δ 161.8, 159.3, 138.5, 138.3, 137.4, 137.2, 134.5, 134.3, 132.4, 132.0, 131.8, 131.4, 131.3, 131.2, 130.9, 130.7, 130.6, 130.4, 129.6, 128.9, 128.8, 128.8, 128.7, 128.4, 128.3, 128.2, 128.1, 128.0, 124.7, 123.4, 123.3, 114.9, 114.7, 34.0, 33.3, 29.1, 29.0. (Due to C–P, C–F coupling and the complexity of the spectrum, doublets cannot be assigned and they are listed as singlets)

**<sup>31</sup>P NMR (CDCl<sub>3</sub>, 162 MHz):** δ 33.4 (dd, *J* = 33.1, 4.2 Hz), -19.1 (dd, *J* = 33.1, 5.9 Hz).

**<sup>19</sup>F NMR (CDCl<sub>3</sub>, 376 MHz)** δ -116.8.

**HRMS (ESI, m/z):** calcd. for C<sub>32</sub>H<sub>28</sub>FOP<sub>2</sub> [M+H]<sup>+</sup>: 509.1594, found: 509.1592.

**HPLC:** Chiracel-ADH, *n*-heptane/*i*-PrOH 80:20, 1.0 mL/min., 40 °C, detection at 206 nm. Retention time (min): 10.1 (minor) and 13.2 (major).

#### <Chromatogram>

mAU

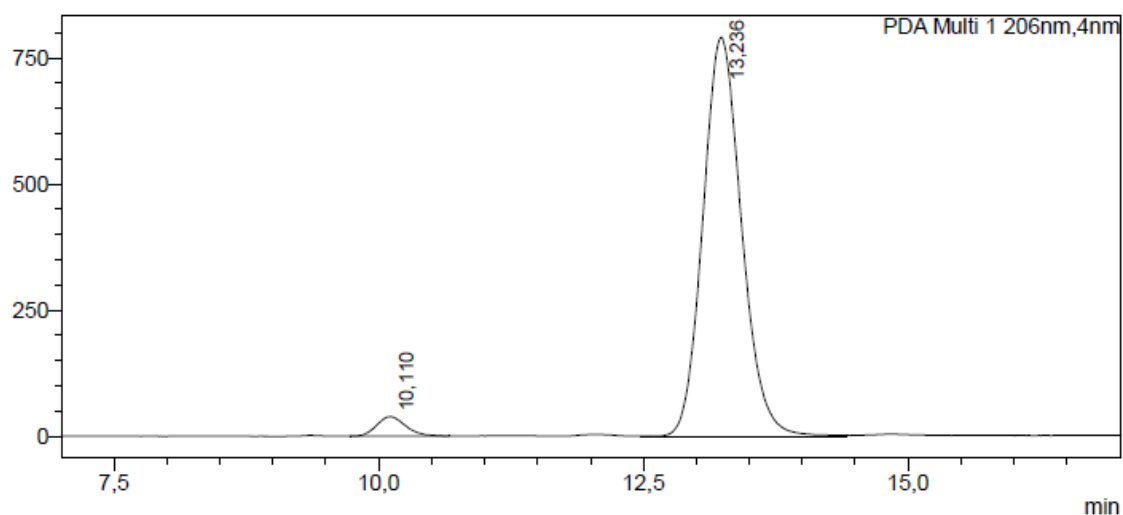

#### <Peak Table>

PDA Ch1 206nm

| Peak# | Ret. Time | Area     | Height | Area%   |
|-------|-----------|----------|--------|---------|
| 1     | 10,110    | 730368   | 38502  | 3,496   |
| 2     | 13,236    | 20161601 | 791032 | 96,504  |
| Total |           | 20891969 | 829534 | 100,000 |

### <Chromatogram>

mAU

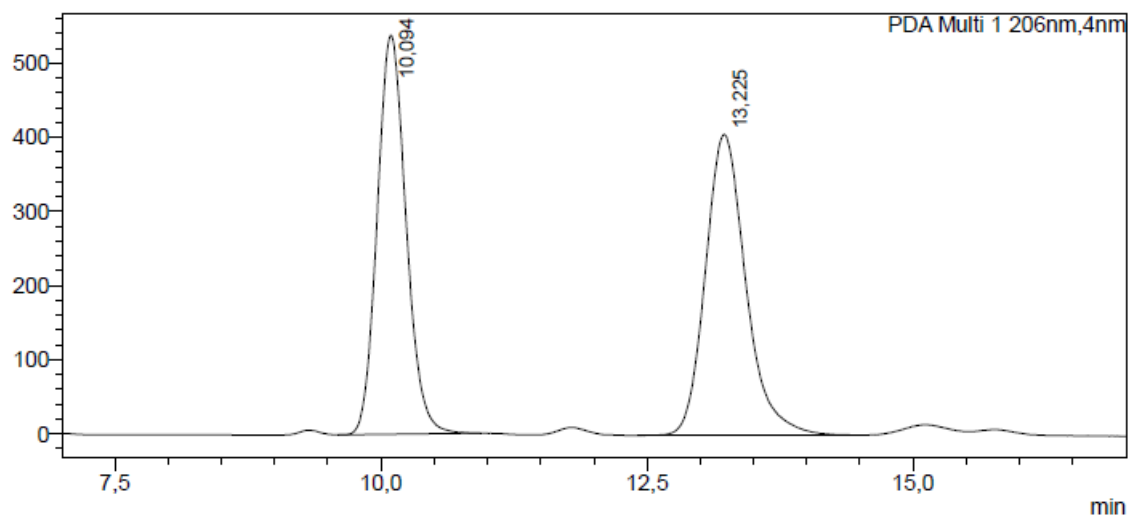

### <Peak Table>

PDA Ch1 206nm

| Peak# | Ret. Time | Area     | Height | Area%   |
|-------|-----------|----------|--------|---------|
| 1     | 10,094    | 10156354 | 537787 | 48,560  |
| 2     | 13,225    | 10758855 | 405797 | 51,440  |
| Total |           | 20915209 | 943584 | 100,000 |

UV Spectrum

Peak# : 1  
Retention Time : 10,094 min  
Compound Name :  
Spectrum Operation:

mAU

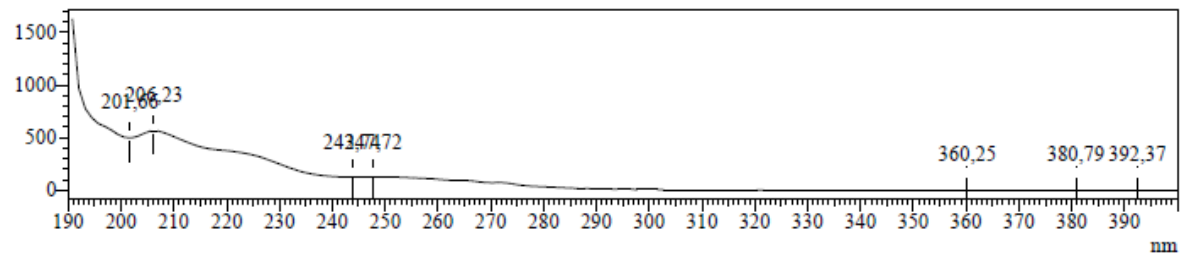

Peak# : 2  
Retention Time : 13,225 min  
Compound Name :  
Spectrum Operation:

mAU

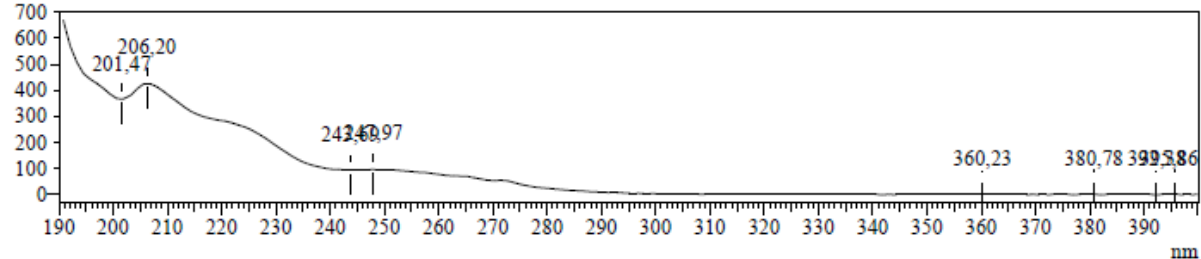

**(S)-(2-(diphenylphosphanyl)-1-(naphthalen-2-yl)ethyl)diphenylphosphine oxide (3ma)**

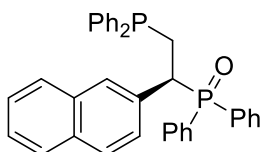

**Following general procedure A:** The reaction was performed with **1m** (0.1 mmol, 1 equiv.), manganese catalyst (0.0025 mmol, 2.5 mol%), barton's base (0.005 mmol, 5 mol%), **2a** (0.105 mmol, 1.05 equiv.), toluene (1.0 mL) at 25°C for 48 h. Product **3ma** was obtained as a white solid after column chromatography (SiO<sub>2</sub>, pentane/ethyl acetate/methanol = 1:1:0.05) [80% yield, 99% ee].

**<sup>1</sup>H NMR (CDCl<sub>3</sub>, 400 MHz):** δ 7.82 – 7.61 (m, 7H, CH<sub>Ar</sub>), 7.61 – 7.51 (m, 1H, CH<sub>Ar</sub>), 7.48 – 7.06 (m, 19H, CH<sub>Ar</sub>), 3.67 – 3.31 (m, 1H, P(O)Ph<sub>2</sub>CH), 3.07 – 2.87 (m, 1H, PPh<sub>2</sub>CHH), 2.74 – 2.48 (m, 1H, PPh<sub>2</sub>CHH).

**<sup>13</sup>C NMR (CDCl<sub>3</sub>, 101 MHz):** δ 138.8, 138.6, 137.4, 137.2, 134.5, 134.3, 133.4, 133.4, 133.1, 133.0, 133.0, 133.0, 132.8, 132.8, 132.5, 132.4, 132.0, 131.9, 131.9, 131.8, 131.5, 131.4, 131.4, 131.4, 131.0, 131.0, 131.0, 129.7, 129.7, 129.4, 129.3, 128.9, 128.9, 128.8, 128.8, 128.3, 128.2, 128.1, 128.1, 128.1, 128.1, 128.0, 127.9, 127.8, 127.7, 127.7, 126.0, 125.8, 125.8, 44.1, 43.9, 43.4, 43.3, 29.3, 29.1. (Due to C–P coupling and the complexity of the spectrum, doublets cannot be assigned and they are listed as singlets)

**<sup>31</sup>P NMR (CDCl<sub>3</sub>, 162 MHz):** δ 33.4 (d, *J* = 31.2 Hz), -19.7 (d, *J* = 31.2 Hz).

**HRMS (ESI, m/z):** calcd. for C<sub>36</sub>H<sub>31</sub>OP<sub>2</sub> [M+H]<sup>+</sup>: 541.1845, found: 541.1838.

**HPLC:** Chiracel-ADH, *n*-heptane/*i*-PrOH 80:20, 1.0 mL/min., 40 °C, detection at 229 nm. Retention time (min): 18.4 (minor) and 48.3 (major).

### <Chromatogram>

mAU

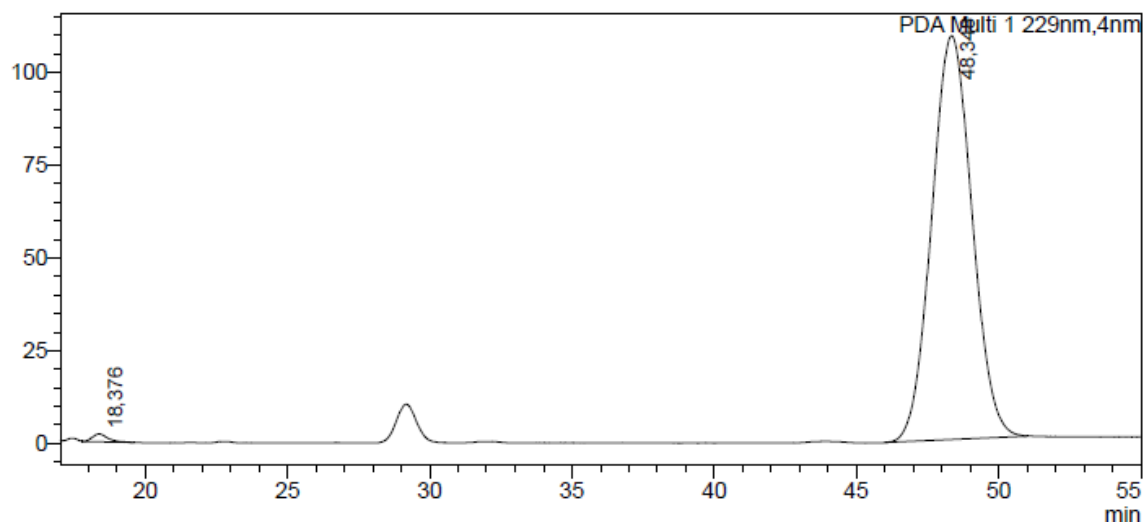

### <Peak Table>

PDA Ch1 229nm

| Peak# | Ret. Time | Area     | Height | Area%   |
|-------|-----------|----------|--------|---------|
| 1     | 18,376    | 77223    | 2087   | 0,713   |
| 2     | 48,348    | 10754932 | 108898 | 99,287  |
| Total |           | 10832155 | 110985 | 100,000 |



### <Chromatogram>

mAU

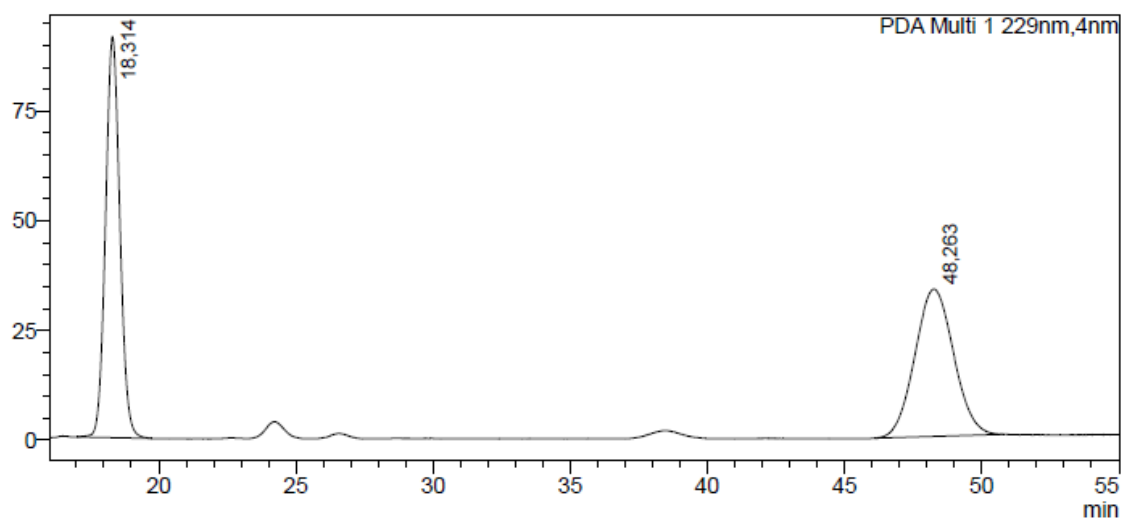

### <Peak Table>

PDA Ch1 229nm

| Peak# | Ret. Time | Area    | Height | Area%   |
|-------|-----------|---------|--------|---------|
| 1     | 18,314    | 3350789 | 91343  | 50,346  |
| 2     | 48,263    | 3304761 | 33549  | 49,654  |
| Total |           | 6655551 | 124892 | 100,000 |

UV Spectrum

Peak# : 1  
Retention Time : 18,314 min  
Compound Name :  
Spectrum Operation:

mAU

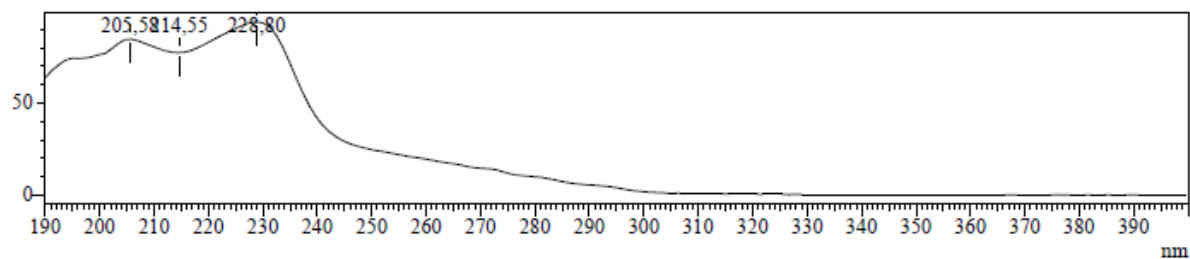

Peak# : 2  
Retention Time : 48,263 min  
Compound Name :  
Spectrum Operation:

mAU

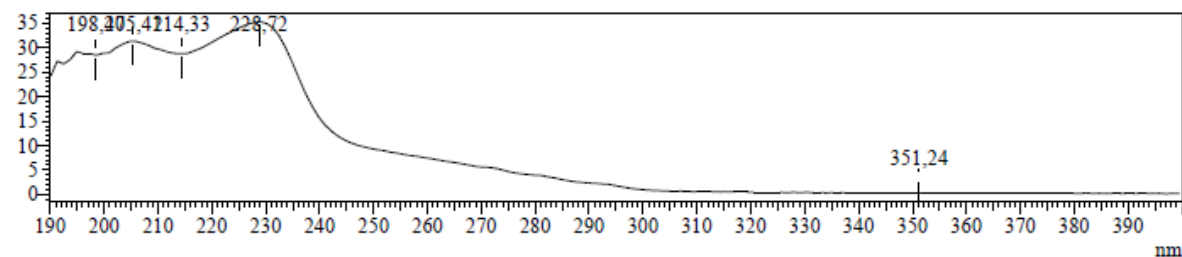

### (S)-(2-(diphenylphosphanyl)-1-(thiophen-3-yl)ethyl)diphenylphosphine oxide (3na)

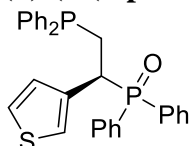

**Following general procedure A:** The reaction was performed with **1n** (0.1 mmol, 1 equiv.), manganese catalyst (0.0025 mmol, 2.5 mol%), *t*PentOK (0.005 mmol, 5 mol%), **2a** (0.105 mmol, 1.05 equiv.), toluene (1.0 mL) at 25°C for 16 h. Product **3na** was obtained as a white solid after column chromatography (SiO<sub>2</sub>, pentane/ethyl acetate/methanol = 1:1:0.05) [97% yield, 97% ee].

**<sup>1</sup>H NMR (CDCl<sub>3</sub>, 400 MHz):** δ 7.76 – 7.08 (m, 21H, CH<sub>Ar</sub>), 6.99 (s, 2H, CH<sub>Ar</sub>), 3.52 – 3.45 (m, 1H, P(O)Ph<sub>2</sub>CH), 2.82 – 2.74 (m, 1H, PPh<sub>2</sub>CHH), 2.54 – 2.50 (m, 1H, PPh<sub>2</sub>CHH).

**<sup>13</sup>C NMR (CDCl<sub>3</sub>, 101 MHz):** δ 138.8, 138.6, 137.4, 137.2, 135.8, 134.4, 134.2, 132.6, 132.0, 131.8, 131.4, 130.9, 129.6, 128.8, 128.3, 128.2, 125.6, 124.2, 39.6, 38.8, 29.2, 29.0. (Due to C–P coupling and the complexity of the spectrum, doublets cannot be assigned and they are listed as singlets)

**<sup>31</sup>P NMR (CDCl<sub>3</sub>, 162 MHz):** δ 30.0 (d, *J* = 31.5 Hz), -21.6 (d, *J* = 31.5 Hz).

**HRMS (ESI, m/Z):** calcd. for C<sub>30</sub>H<sub>27</sub>OP<sub>2</sub>S [M+H]<sup>+</sup>: 497.1252, found: 497.1250.

**HPLC:** Chiracel-ADH, *n*-heptane/*i*-PrOH 80:20, 1.0 mL/min., 40 °C, detection at 207 nm. Retention time (min): 16.6 (minor) and 17.7 (major).

**<Chromatogram>**

mAU

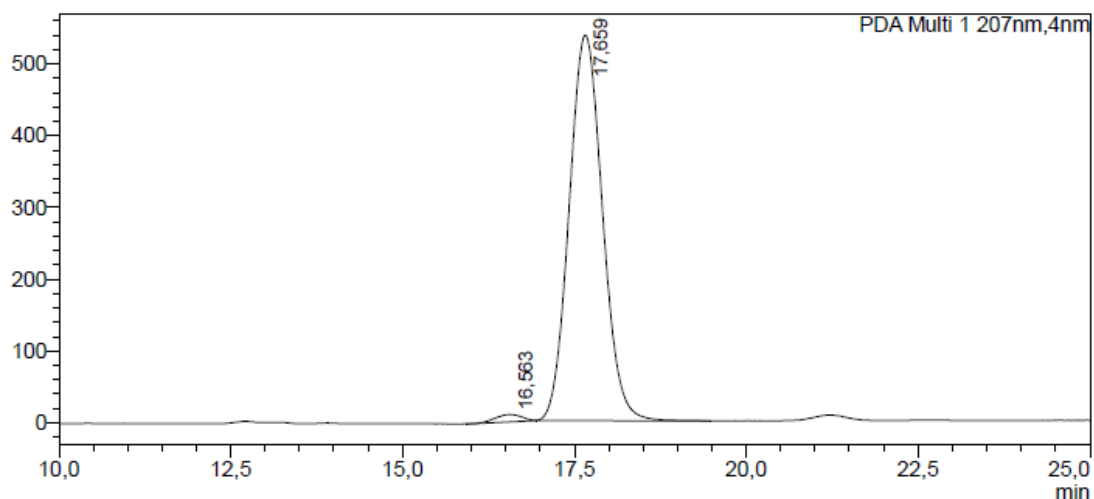

**<Peak Table>**

PDA Ch1 207nm

| Peak# | Ret. Time | Area     | Height | Area%   |
|-------|-----------|----------|--------|---------|
| 1     | 16,563    | 278459   | 10345  | 1,516   |
| 2     | 17,659    | 18088698 | 536979 | 98,484  |
| Total |           | 18367157 | 547324 | 100,000 |

### <Chromatogram>

mAU

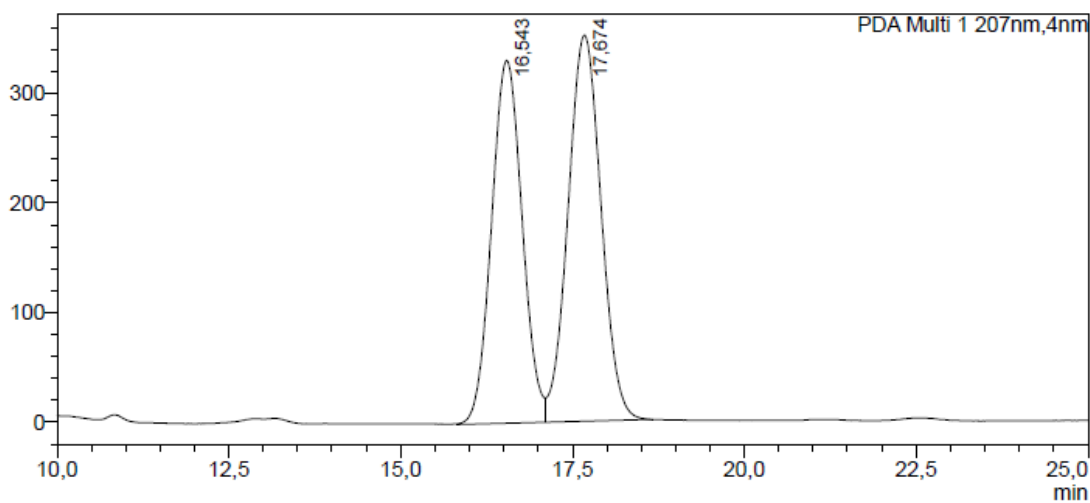

### <Peak Table>

PDA Ch1 207nm

| Peak# | Ret. Time | Area     | Height | Area%   |
|-------|-----------|----------|--------|---------|
| 1     | 16,543    | 10280301 | 330944 | 46,636  |
| 2     | 17,674    | 11763508 | 352183 | 53,364  |
| Total |           | 22043809 | 683127 | 100,000 |

### UV Spectrum

Peak# : 1  
Retention Time : 16,543 min  
Compound Name :  
Spectrum Operation:

mAU

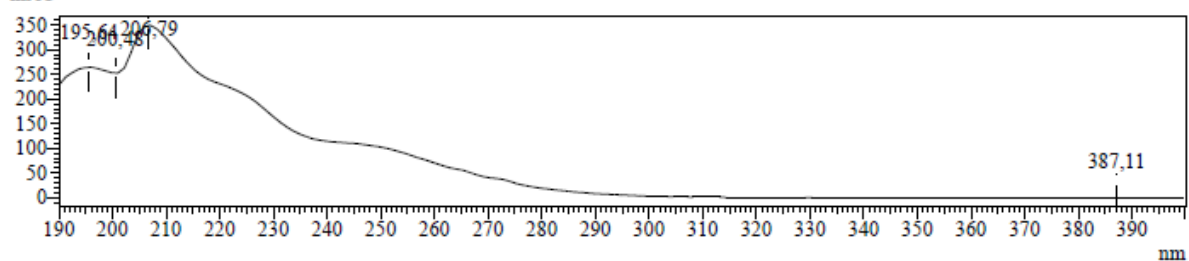

Peak# : 2  
Retention Time : 17,674 min  
Compound Name :  
Spectrum Operation:

mAU

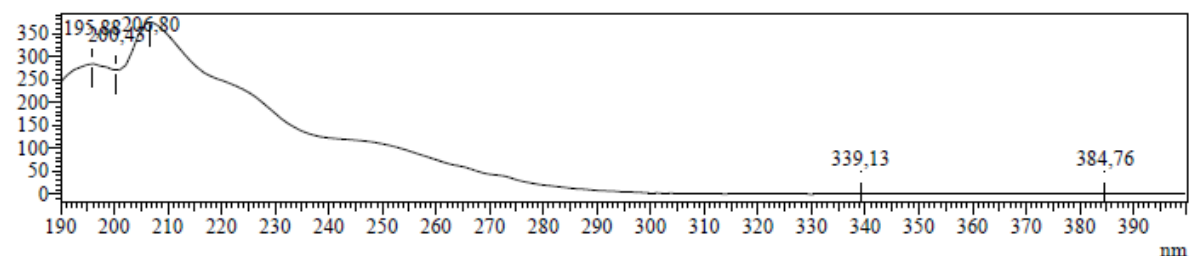

**(S)-(2-(diphenylphosphaneyl)-1-(pyridin-3-yl)ethyl)diphenylphosphine oxide (30a)**

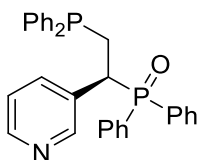

**Following general procedure A:** The reaction was performed with **1o** (0.1 mmol, 1 equiv.), manganese catalyst (0.005 mmol, 5 mol%), *t*PentOK (0.01 mmol, 10 mol%), **2a** (0.105 mmol, 1.05 equiv.), toluene (1.0 mL) at 25°C for 16 h. Product **3oa** was obtained as a white solid after column chromatography (SiO<sub>2</sub>, pentane/ethyl acetate/methanol = 1:1:0.05) [80% yield, 94% ee].

**<sup>1</sup>H NMR (CDCl<sub>3</sub>, 400 MHz):** δ 8.36 (d, *J* = 4.7 Hz, 1H, CH<sub>Ar</sub>), 8.08 (s, 1H, CH<sub>Ar</sub>), 7.83 (d, *J* = 8.1 Hz, 1H, CH<sub>Ar</sub>), 7.66 – 7.57 (m, 2H, CH<sub>Ar</sub>), 7.57 – 7.50 (m, 1H, CH<sub>Ar</sub>), 7.48 – 7.40 (m, 3H, CH<sub>Ar</sub>), 7.39 – 7.33 (m, 2H, CH<sub>Ar</sub>), 7.31 – 7.21 (m, 5H, CH<sub>Ar</sub>), 7.20 – 7.11 (m, 8H, CH<sub>Ar</sub>), 3.36 – 3.20 (m, 1H, P(O)Ph<sub>2</sub>CH), 2.91 – 2.75 (m, 1H, PPh<sub>2</sub>CHH), 2.63 – 2.46 (m, 1H, PPh<sub>2</sub>CHH).

**<sup>13</sup>C NMR (CDCl<sub>3</sub>, 101 MHz):** δ 151.3, 151.2, 148.7, 138.3, 138.1, 136.9, 136.8, 136.8, 136.7, 134.4, 134.2, 132.2, 132.2, 132.0, 131.8, 131.8, 131.7, 131.4, 131.3, 130.8, 130.7, 129.8, 129.1, 129.0, 129.0, 128.9, 128.5, 128.4, 128.4, 128.4, 128.3, 123.6, 41.3, 41.2, 40.7, 40.5, 28.7, 28.5. (Due to C–P coupling and the complexity of the spectrum, doublets cannot be assigned and they are listed as singlets)

**<sup>31</sup>P NMR (CDCl<sub>3</sub>, 162 MHz):** δ 30.10(d, *J* = 30.6 Hz), -22.5 (d, *J* = 30.6 Hz).

**HRMS (ESI, m/z):** calcd. for C<sub>31</sub>H<sub>28</sub>NOP<sub>2</sub> [M+H]<sup>+</sup>: 492.1641, found: 492.1636.

**HPLC:** Chiracel-ADH, *n*-heptane/*i*-PrOH 80:20, 1.0 mL/min., 40 °C, detection at 206 nm. Retention time (min): 17.6 (minor) and 42.9 (major).

#### <Chromatogram>

mAU

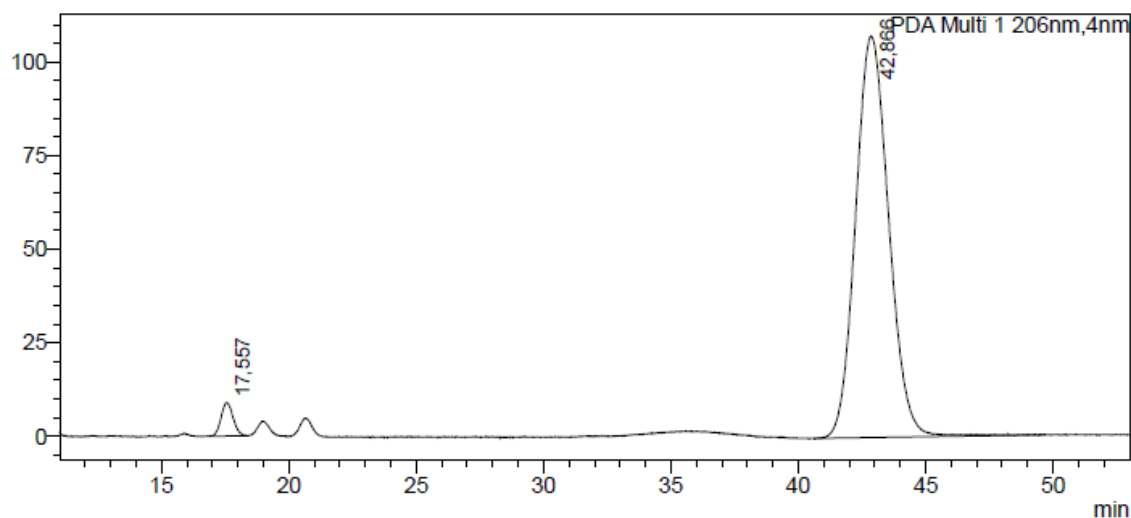

#### <Peak Table>

PDA Ch1 206nm

| Peak# | Ret. Time | Area     | Height | Area%   |
|-------|-----------|----------|--------|---------|
| 1     | 17,557    | 294681   | 8999   | 2,944   |
| 2     | 42,866    | 9716073  | 107295 | 97,056  |
| Total |           | 10010755 | 116294 | 100,000 |

### <Chromatogram>

mAU

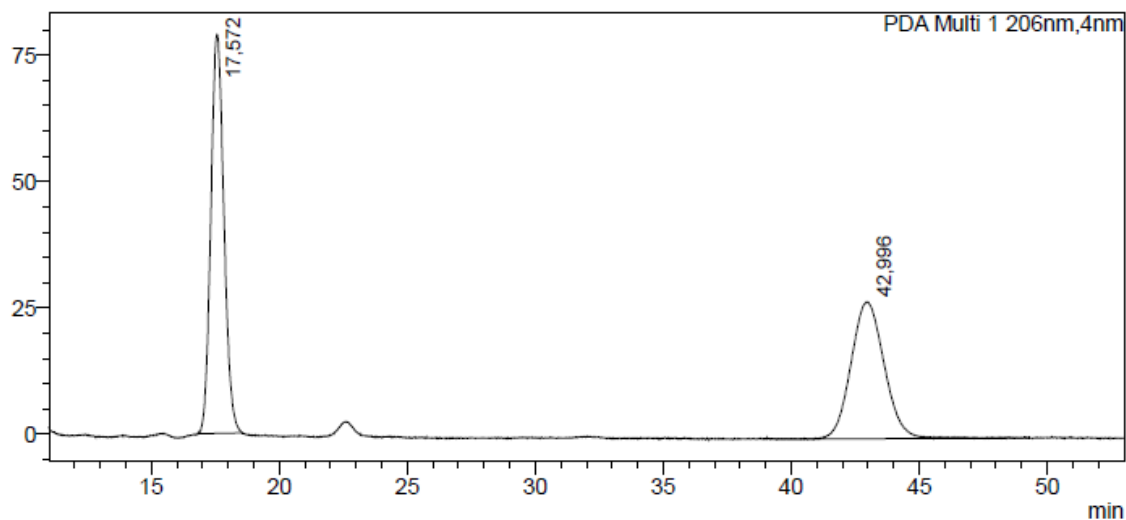

### <Peak Table>

PDA Ch1 206nm

| Peak# | Ret. Time | Area    | Height | Area%   |
|-------|-----------|---------|--------|---------|
| 1     | 17,572    | 2804045 | 78935  | 53,236  |
| 2     | 42,996    | 2463152 | 27088  | 46,764  |
| Total |           | 5267197 | 106023 | 100,000 |

UV Spectrum

Peak# : 1  
Retention Time : 17,572 min  
Compound Name :  
Spectrum Operation:

mAU

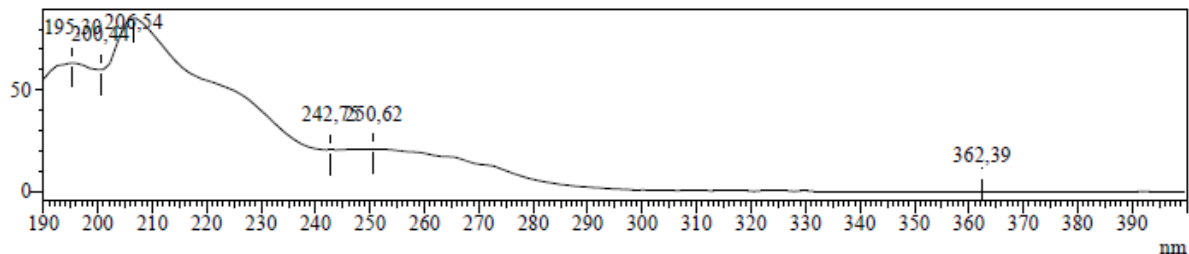

Peak# : 2  
Retention Time : 42,996 min  
Compound Name :  
Spectrum Operation:

mAU

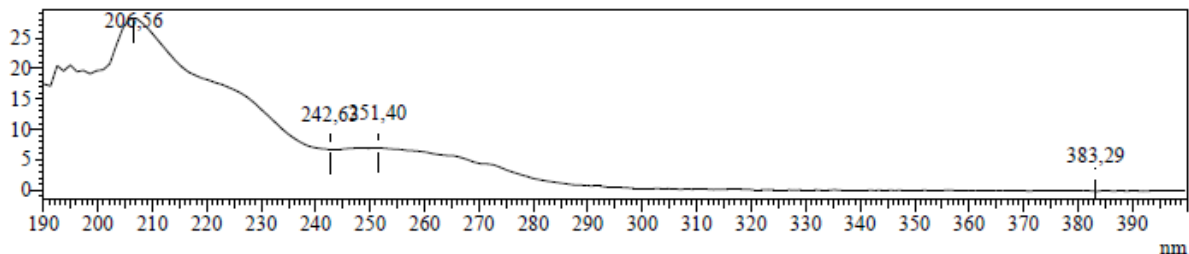

**(S)-2-(diphenylphosphanyl)-1-ferrocenylethyl)diphenylphosphine oxide (3pa)**

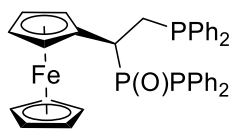

**Following general procedure A:** The reaction was performed with **1p** (0.1 mmol, 1 equiv.), manganese catalyst (0.0025 mmol, 2.5 mol%), *t*PentOK (0.005 mmol, 5 mol%), **2a** (0.105 mmol, 1.05 equiv.), toluene (1.0 mL) at 25°C for 16 h. Product **3pa** was obtained as an orange solid after column chromatography (SiO<sub>2</sub>, pentane/ethyl acetate/methanol = 1:1:0.05) [92% yield, 98% ee].

**<sup>1</sup>H NMR (CDCl<sub>3</sub>, 400 MHz):** δ 7.61 – 7.56 (m, 2H, CH<sub>Ar</sub>), 7.47 – 7.38 (m, 7H, CH<sub>Ar</sub>), 7.37 – 7.24 (m, 11H, CH<sub>Ar</sub>), 4.25 (d, *J* = 1.2 Hz, 1H, CH<sub>Fe</sub>), 4.09 – 4.08 (m, 1H, CH<sub>Fe</sub>), 4.05 (s, 5H, CH<sub>Fe</sub>), 3.91 – 3.89 (m, 1H, CH<sub>Fe</sub>), 3.51 (d, *J* = 1.3 Hz, 1H, CH<sub>Fe</sub>), 3.46 – 3.37 (m, 1H, P(O)Ph<sub>2</sub>CH), 3.06 – 2.97 (m, 1H, PPh<sub>2</sub>CHH), 2.59 – 2.49 (m, 1H, PPh<sub>2</sub>CHH).

**<sup>13</sup>C NMR (CDCl<sub>3</sub>, 101 MHz):** δ 139.8, 139.7, 138.0, 137.8, 133.6, 133.4, 133.0, 132.8, 132.1, 132.0, 132.0, 131.7, 131.6, 131.6, 131.5, 131.4, 131.4, 130.7, 128.9, 128.7, 128.7, 128.7, 128.6, 128.6, 128.5, 128.4, 128.0, 127.9, 86.2, 86.2, 69.3, 69.2, 68.1, 68.1, 68.1, 67.5, 67.2, 38.4, 38.2, 37.8, 37.6, 28.1, 28.0. (Due to C–P coupling and the complexity of the spectrum, doublets cannot be assigned and they are listed as singlets)

**<sup>31</sup>P NMR (CDCl<sub>3</sub>, 162 MHz):** δ 33.5 (d, *J* = 20.3 Hz), -17.5 (d, *J* = 20.3 Hz).

**HRMS (ESI, m/z):** calcd. for C<sub>36</sub>H<sub>33</sub>FeOP<sub>2</sub> [M+H]<sup>+</sup>: 599.1351, found: 599.1354.

**HPLC:** Chiracel-ODH, *n*-heptane/*i*-PrOH 95:05, 0.5 mL/min., 40 °C, detection at 254 nm. Retention time (min): 23.9 (major) and 28.8 (minor).

#### <Chromatogram>

mAU

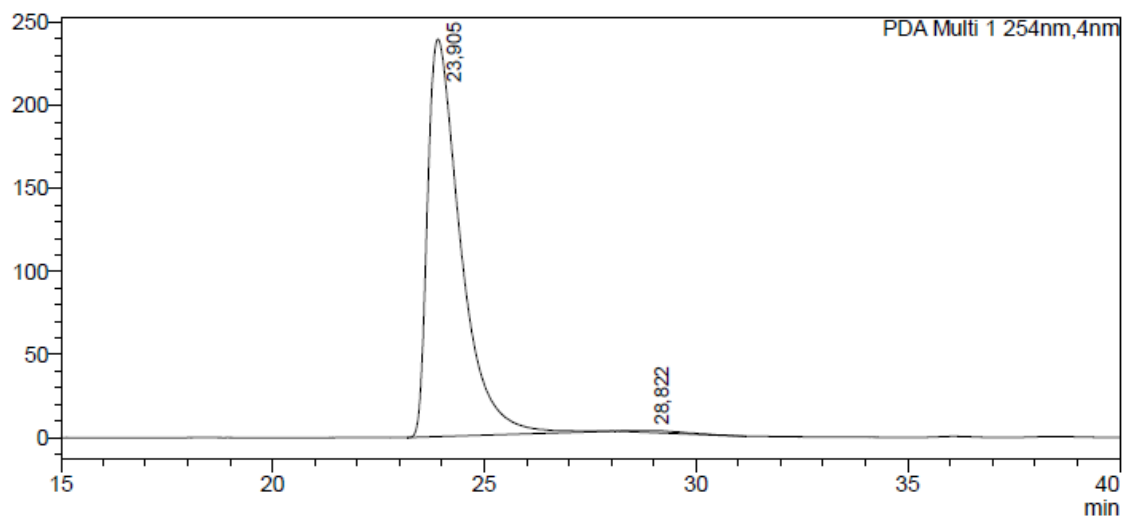

#### <Peak Table>

PDA Ch1 254nm

| Peak# | Ret. Time | Area     | Height | Area%   |
|-------|-----------|----------|--------|---------|
| 1     | 23,905    | 13013279 | 239216 | 99,168  |
| 2     | 28,822    | 109220   | 1116   | 0,832   |
| Total |           | 13122499 | 240332 | 100,000 |

### <Chromatogram>

mAU

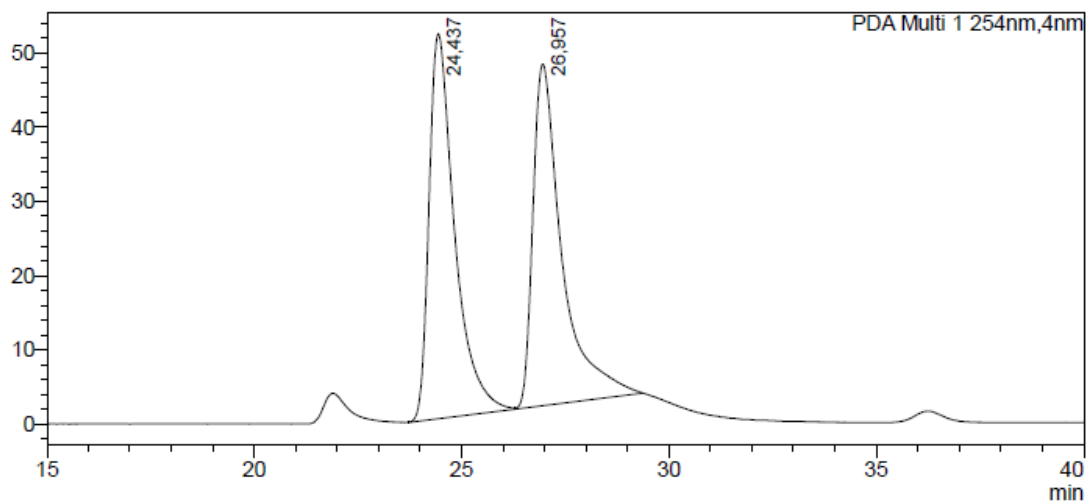

### <Peak Table>

PDA Ch1 254nm

| Peak# | Ret. Time | Area    | Height | Area%   |
|-------|-----------|---------|--------|---------|
| 1     | 24,437    | 2234712 | 51887  | 49,871  |
| 2     | 26,957    | 2246236 | 46012  | 50,129  |
| Total |           | 4480948 | 97899  | 100,000 |

### UV Spectrum

Peak# : 1  
Retention Time : 24,437 min  
Compound Name :  
Spectrum Operation:

mAU

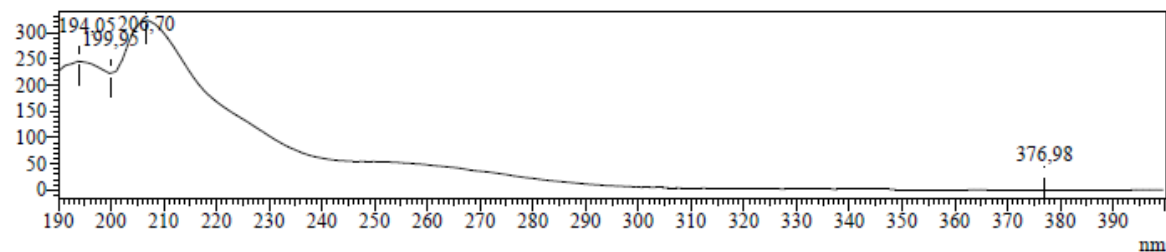

Peak# : 2  
Retention Time : 26,957 min  
Compound Name :  
Spectrum Operation:

mAU

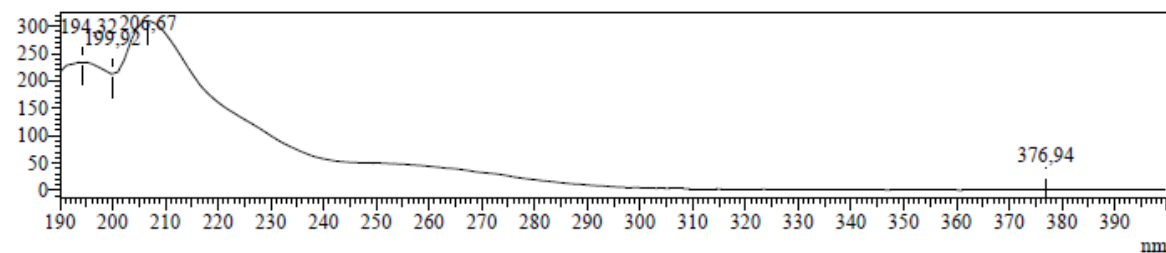

(S)-(1-(diphenylphosphanyl)hexan-2-yl)diphenylphosphine oxide (3qa)

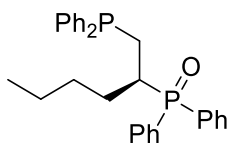

**Following general procedure A:** The reaction was performed with **1q** (0.1 mmol, 1 equiv.), manganese catalyst (0.005 mmol, 5 mol%), *t*PentOK (0.01 mmol, 10 mol%), **2a** (0.105 mmol, 1.05 equiv.), toluene (1.0 mL) at 25°C for 72 h. Product **3qa** was obtained as a white solid after column chromatography (SiO<sub>2</sub>, pentane/ethyl acetate/methanol = 1:1:0.05) [95% yield, >99% ee].

**<sup>1</sup>H NMR (CDCl<sub>3</sub>, 400 MHz):** δ 7.68 – 7.60 (m, 2H, CH<sub>Ar</sub>), 7.53 – 7.19 (m, 18H, CH<sub>Ar</sub>), 2.36 – 2.22 (m, 2H), 2.22 – 2.08 (m, 1H), 2.07 – 1.86 (m, 1H), 1.79 – 1.60 (m, 1H), 1.55 – 1.35 (m, 1H), 1.22 – 1.00 (m, 3H), 0.70 (t, *J* = 7.1 Hz, 3H, CH<sub>3</sub>).

**<sup>13</sup>C NMR (CDCl<sub>3</sub>, 101 MHz):** δ 138.8, 138.6, 137.5, 137.3, 134.3, 134.1, 133.3, 132.7, 132.3, 132.2, 132.0, 131.8, 131.6, 131.6, 131.6, 131.2, 131.1, 131.0, 130.9, 129.5, 128.8, 128.8, 128.7, 128.7, 128.6, 128.6, 128.5, 128.4, 128.4, 34.5, 34.4, 33.8, 33.7, 30.2, 30.2, 30.2, 30.2, 28.2, 28.2, 28.1, 28.1, 27.4, 27.4, 27.2, 27.2, 22.9, 13.8. (Due to C–P coupling and the complexity of the spectrum, doublets cannot be assigned and they are listed as singlets)

**<sup>31</sup>P NMR (CDCl<sub>3</sub>, 162 MHz):** δ 33.4 (d, *J* = 32.2 Hz), -21.5 (d, *J* = 32.2 Hz).

**HRMS (ESI, *m/z*):** calcd. for C<sub>30</sub>H<sub>33</sub>OP<sub>2</sub> [M+H]<sup>+</sup>: 471.2001, found: 471.1998.

**HPLC:** Chiracel-ADH, *n*-heptane/*i*-PrOH 80:20, 1.0 mL/min., 40 °C, detection at 206 nm. Retention time (min): 13.4 (minor) and 14.8 (major).

#### <Chromatogram>

mAU

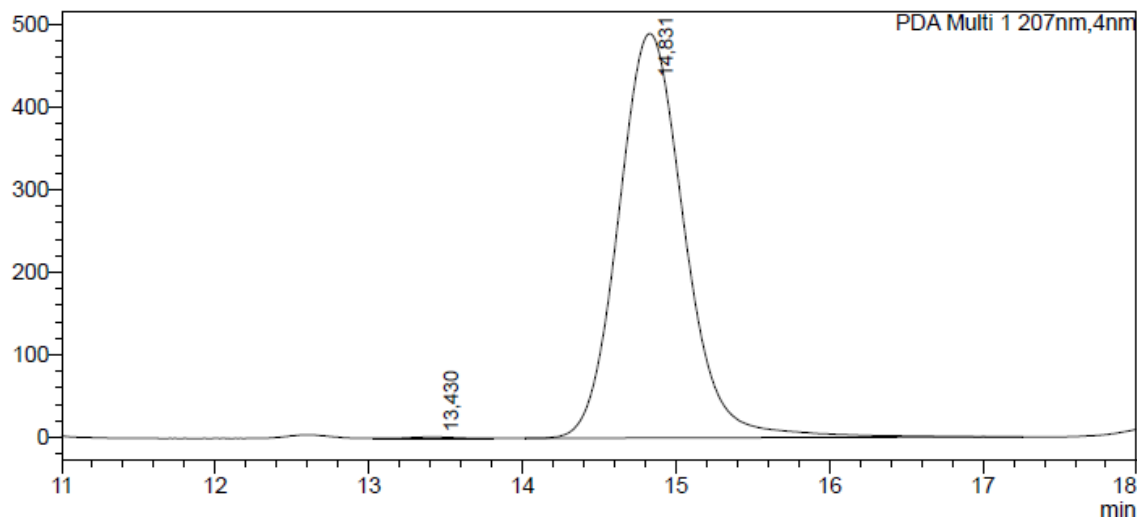

#### <Peak Table>

PDA Ch1 207nm

| Peak# | Ret. Time | Area     | Height | Area%   |
|-------|-----------|----------|--------|---------|
| 1     | 13.430    | 33676    | 1495   | 0.230   |
| 2     | 14.831    | 14635416 | 489316 | 99.770  |
| Total |           | 14669092 | 490810 | 100.000 |



### <Chromatogram>

mAU

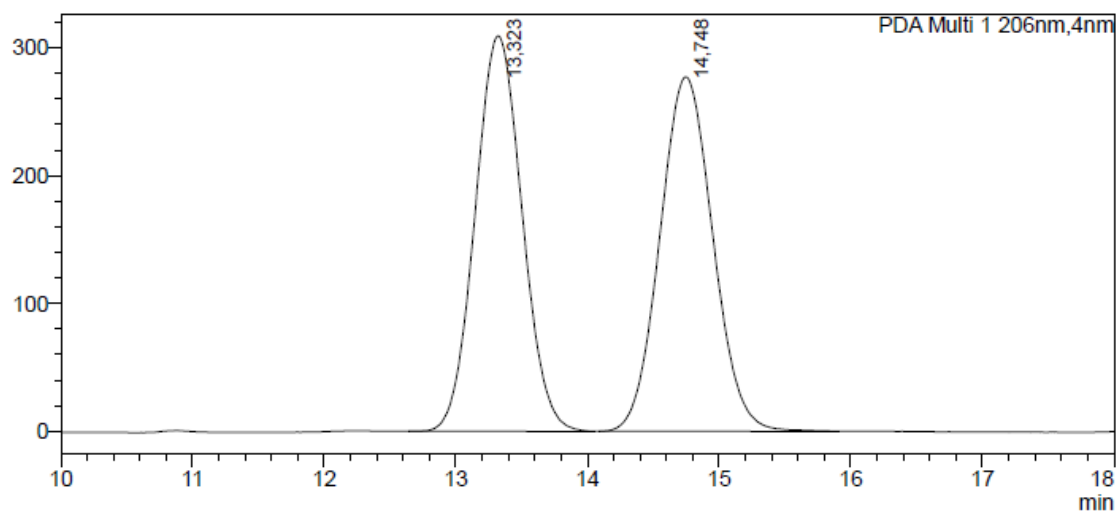

### <Peak Table>

PDA Ch1 206nm

| Peak# | Ret. Time | Area     | Height | Area%   |
|-------|-----------|----------|--------|---------|
| 1     | 13,323    | 7676102  | 309232 | 49,751  |
| 2     | 14,748    | 7752827  | 277052 | 50,249  |
| Total |           | 15428928 | 586284 | 100,000 |

UV Spectrum

Peak# : 1  
Retention Time : 13,323 min  
Compound Name :  
Spectrum Operation:

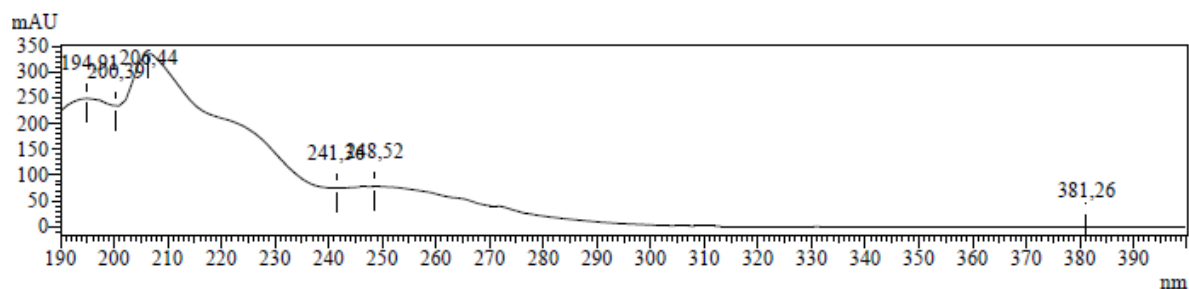

Peak# : 2  
Retention Time : 14,748 min  
Compound Name :  
Spectrum Operation:

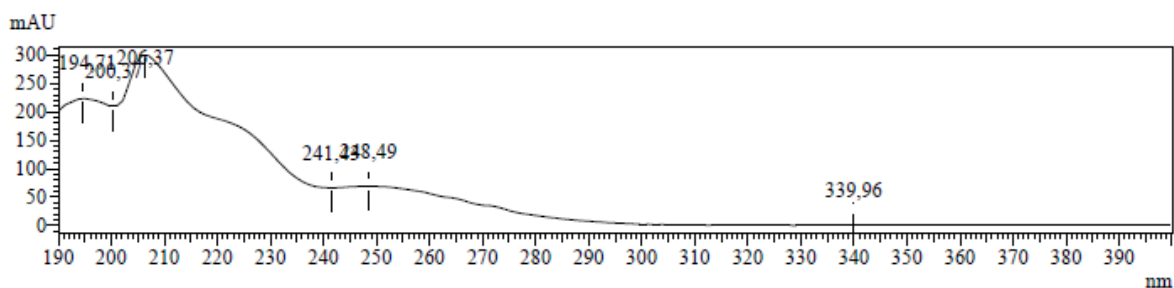

**(S)-(1-(diphenylphosphanyl)hexan-2-yl)diphenylphosphine oxide (3ra)**

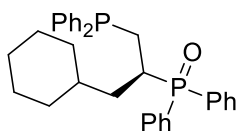

**Following general procedure A:** The reaction was performed with **1r** (0.1 mmol, 1 equiv.), manganese catalyst (0.005 mmol, 5 mol%), *t*PentOK (0.01 mmol, 10 mol%), **2a** (0.105 mmol, 1.05 equiv.), toluene (1.0 mL) at 25°C for 72 h. Product **3ra** was obtained as a white solid after column chromatography (SiO<sub>2</sub>, pentane/ethyl acetate/methanol = 1:1:0.05) [80% yield, 90% ee].

**<sup>1</sup>H NMR (CDCl<sub>3</sub>, 400 MHz):** δ 7.71 – 7.62 (m, 2H, CH<sub>Ar</sub>), 7.58 – 7.49 (m, 2H, CH<sub>Ar</sub>), 7.49 – 7.21 (m, 16H, CH<sub>Ar</sub>), 2.48 – 2.35 (m, 1H, P(O)Ph<sub>2</sub>CH), 2.34 – 2.22 (m, 1H, PPh<sub>2</sub>CHH), 2.21 – 2.08 (m, 1H, PPh<sub>2</sub>CHH), 1.83 – 1.65 (m, 2H), 1.62 – 1.36 (m, 5H), 1.14 – 0.67 (m, 5H), 0.61 – 0.45 (m, 1H).

**<sup>13</sup>C NMR (CDCl<sub>3</sub>, 101 MHz):** δ 139.0, 138.9, 137.8, 137.6, 134.4, 134.2, 133.5, 132.8, 132.6, 132.2, 132.1, 131.8, 131.6, 131.6, 131.5, 131.2, 131.2, 131.1, 131.0, 129.4, 128.7, 128.7, 128.6, 128.6, 128.5, 128.5, 128.4, 128.3, 36.9, 36.9, 36.8, 36.8, 36.0, 35.9, 35.9, 35.9, 33.4, 33.1, 31.6, 31.5, 30.9, 30.8, 29.1, 29.1, 28.0, 28.9, 26.5, 26.3, 26.1. (Due to C–P coupling and the complexity of the spectrum, doublets cannot be assigned and they are listed as singlets)

**<sup>31</sup>P NMR (CDCl<sub>3</sub>, 162 MHz):** δ 36.4 (d, *J* = 31.0 Hz), -17.3 (d, *J* = 31.0 Hz).

**HRMS (ESI, m/z):** calcd. for C<sub>33</sub>H<sub>37</sub>OP<sub>2</sub> [M+H]<sup>+</sup>: 511.2314, found: 511.2312.

**HPLC:** Chiracel-ADH, *n*-heptane/*i*-PrOH 80:20, 1.0 mL/min., 40 °C, detection at 206 nm. Retention time (min): 15.7 (major) and 26.0 (minor).

#### <Chromatogram>

mAU

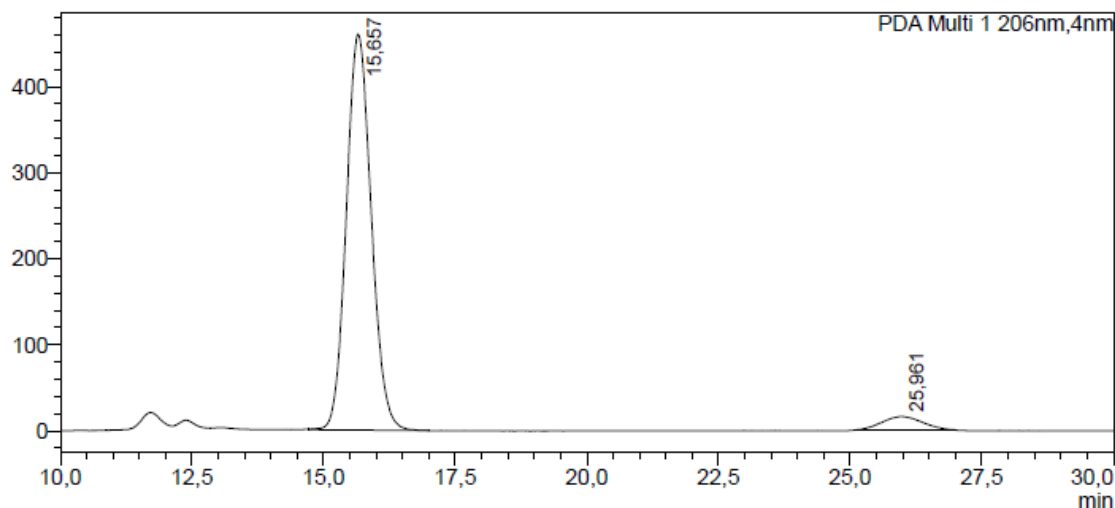

#### <Peak Table>

PDA Ch1 206nm

| Peak# | Ret. Time | Area     | Height | Area%   |
|-------|-----------|----------|--------|---------|
| 1     | 15,657    | 15177338 | 459969 | 94,761  |
| 2     | 25,961    | 839128   | 15579  | 5,239   |
| Total |           | 16016466 | 475547 | 100,000 |

### <Chromatogram>

mAU

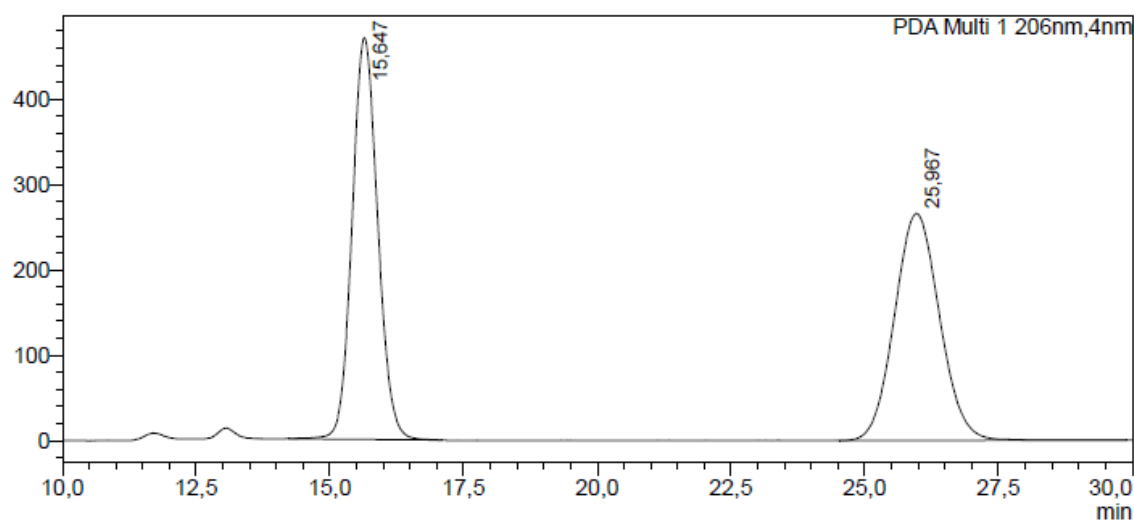

### <Peak Table>

PDA Ch1 206nm

| Peak# | Ret. Time | Area     | Height | Area%   |
|-------|-----------|----------|--------|---------|
| 1     | 15,647    | 15681927 | 470262 | 50,178  |
| 2     | 25,967    | 15570938 | 265615 | 49,822  |
| Total |           | 31252866 | 735877 | 100,000 |

UV Spectrum

Peak# : 1  
Retention Time : 15,647 min  
Compound Name :  
Spectrum Operation:

mAU

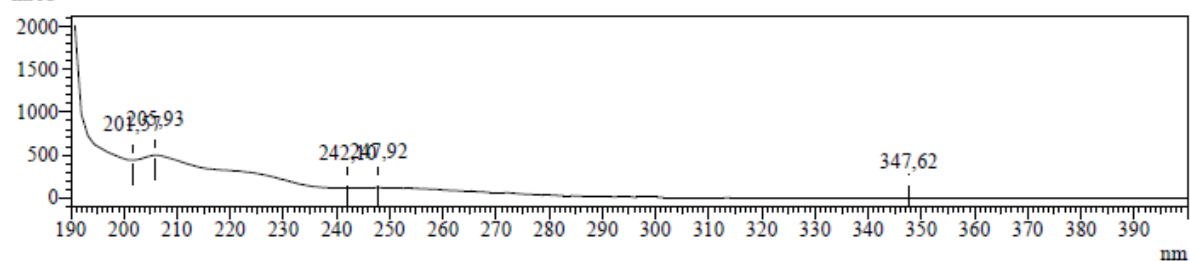

Peak# : 2  
Retention Time : 25,967 min  
Compound Name :  
Spectrum Operation:

mAU

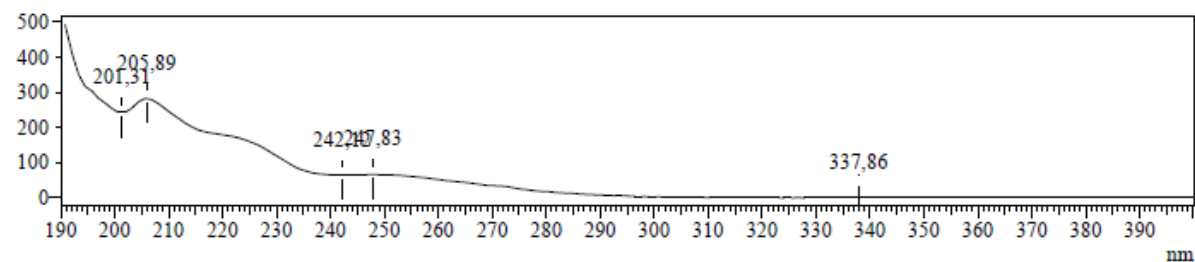

**(S)-(1-cyclopropyl-2-(diphenylphosphaneyl)ethyl)diphenylphosphine oxide (3sa)**

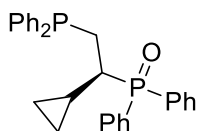

**Following general procedure A:** The reaction was performed with **1s** (0.1 mmol, 1 equiv.), manganese catalyst (0.005 mmol, 5 mol%), *t*PentOK (0.01 mmol, 10 mol%), **2a** (0.105 mmol, 1.05 equiv.), toluene (1.0 mL) at 25°C for 72 h. Product **3sa** was obtained as a white solid after column chromatography (SiO<sub>2</sub>, pentane/ethyl acetate/methanol = 1:1:0.05) [90% yield, >99% ee].

**<sup>1</sup>H NMR (CDCl<sub>3</sub>, 400 MHz):** δ 7.77 – 7.62 (m, 2H, CH<sub>Ar</sub>), 7.62 – 7.51 (m, 2H, CH<sub>Ar</sub>), 7.51 – 7.20 (m, 16H, CH<sub>Ar</sub>), 2.55 – 2.37 (m, 2H), 1.75 – 1.50 (m, 1H), 1.11 – 0.91 (m, 1H), 0.60 – 0.46 (m, 1H), 0.42 – 0.27 (m, 1H), 0.19 – 0.04 (m, 1H), 0.37 – 0.54 (m, 1H).

**<sup>13</sup>C NMR (CDCl<sub>3</sub>, 101 MHz):** δ 139.2, 139.1, 138.1, 137.9, 134.1, 133.9, 133.6, 132.7, 132.6, 132.3, 132.1, 131.7, 131.7, 131.5, 131.5, 131.4, 131.3, 131.2, 131.1, 129.3, 128.8, 128.8, 128.7, 128.4, 128.4, 128.4, 128.3, 128.3, 41.0, 40.8, 40.3, 40.2, 29.1, 28.9, 11.0, 7.0, 6.9, 6.9, 6.8, 5.7. (Due to C–P coupling and the complexity of the spectrum, doublets cannot be assigned and they are listed as singlets)

**<sup>31</sup>P NMR (CDCl<sub>3</sub>, 162 MHz):** δ 32.4 (d, *J* = 30.3 Hz), -20.4 (d, *J* = 30.3 Hz).

**HRMS (ESI, m/z):** calcd. for C<sub>29</sub>H<sub>29</sub>OP<sub>2</sub> [M+H]<sup>+</sup>: 455.1688, found: 455.1684.

**HPLC:** Chiracel-ADH, *n*-heptane/*i*-PrOH 90:10, 0.5 mL/min., 40 °C, detection at 206 nm. Retention time (min): 54.7 (minor) and 58.5 (major).

#### <Chromatogram>

mAU

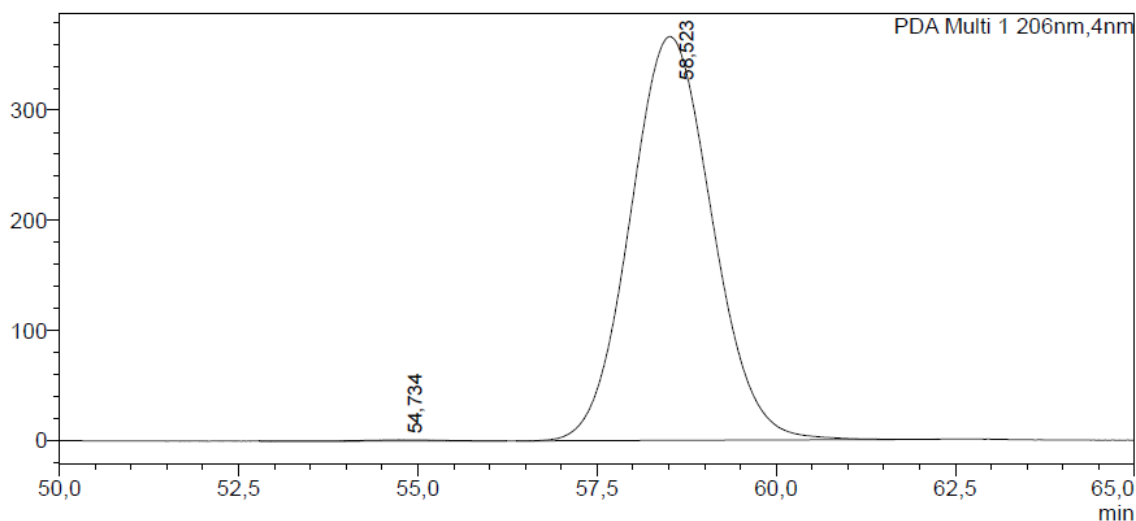

#### <Peak Table>

PDA Ch1 206nm

| Peak# | Ret. Time | Area     | Height | Area%   |
|-------|-----------|----------|--------|---------|
| 1     | 54,734    | 78033    | 1045   | 0,267   |
| 2     | 58,523    | 29167964 | 366445 | 99,733  |
| Total |           | 29245997 | 367489 | 100,000 |

### <Chromatogram>

mAU

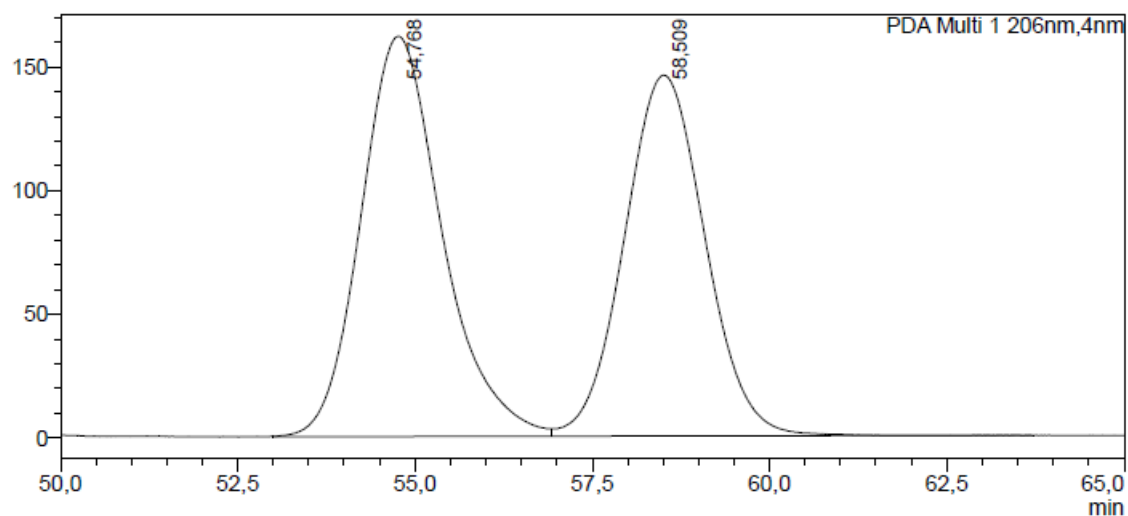

### <Peak Table>

PDA Ch1 206nm

| Peak# | Ret. Time | Area     | Height | Area%   |
|-------|-----------|----------|--------|---------|
| 1     | 54,768    | 12910197 | 161748 | 52,756  |
| 2     | 58,509    | 11561427 | 145839 | 47,244  |
| Total |           | 24471624 | 307587 | 100,000 |

UV Spectrum

Peak# : 1  
Retention Time : 54,768 min  
Compound Name :  
Spectrum Operation:

mAU

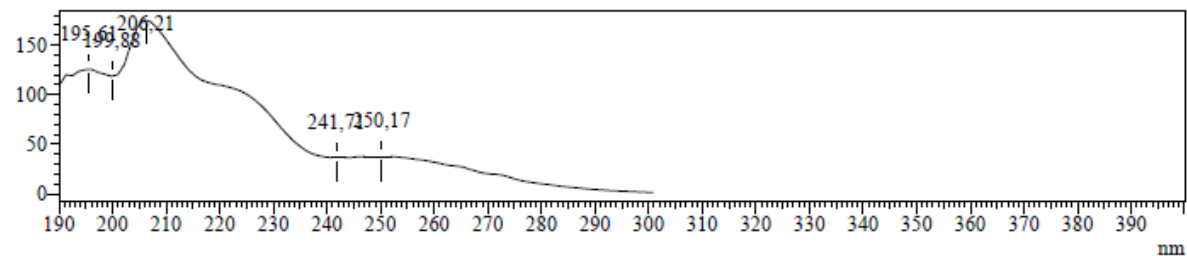

Peak# : 2  
Retention Time : 58,509 min  
Compound Name :  
Spectrum Operation:

mAU

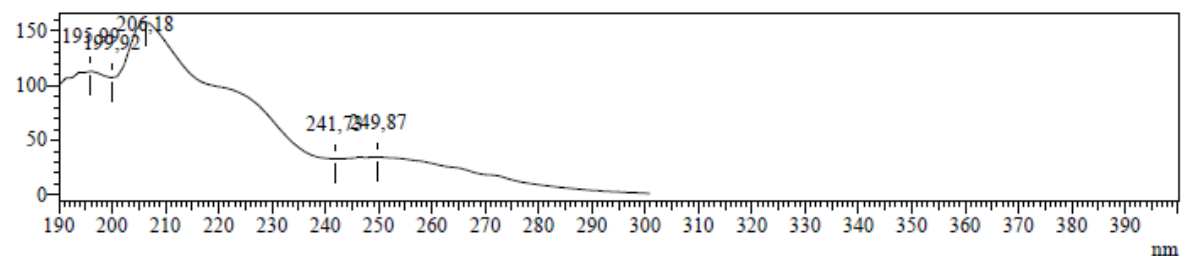

**(S)-(1-(diphenylphosphanyl)-5-hydroxypentan-2-yl)diphenylphosphine oxide (3ta)**

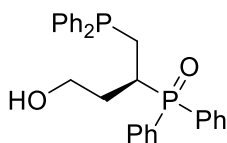

**Following general procedure A:** The reaction was performed with **1t** (0.1 mmol, 1 equiv.), manganese catalyst (0.005 mmol, 5 mol%), *t*PentOK (0.01 mmol, 10 mol%), **2a** (0.105 mmol, 1.05 equiv.), toluene (1.0 mL) at 25°C for 5 days. Product **3ta** was obtained as a white solid after column chromatography (SiO<sub>2</sub>, ethyl acetate/methanol =1:0.05) [61% yield, 82% ee].

**<sup>1</sup>H NMR (CDCl<sub>3</sub>, 400 MHz):** δ 7.66 – 7.31 (m, 13H, CH<sub>Ar</sub>), 7.32 – 7.24 (m, 7H, CH<sub>Ar</sub>), 4.66 (br s, 1H, OH), 3.97 – 3.80 (m, 1H, OHCHH), 3.78 – 3.56 (m, 1H, OHCHH), 2.55 – 2.38 (m, 1H, P(O)Ph<sub>2</sub>CH), 2.37 – 2.17 (m, 3H), 2.13 – 1.90 (m, 1H).

**<sup>13</sup>C NMR (CDCl<sub>3</sub>, 101 MHz):** δ 138.0, 137.9, 136.6, 136.5, 134.2, 134.0, 131.9, 131.8, 131.7, 131.3, 131.2, 131.0, 130.9, 129.7, 128.8, 128.8, 128.5, 128.4, 58.5, 33.2, 33.1, 32.6, 32.4, 30.4, 30.3, 25.5, 25.3. (Due to C–P coupling and the complexity of the spectrum, doublets cannot be assigned and they are listed as singlets)

**<sup>31</sup>P NMR (CDCl<sub>3</sub>, 162 MHz):** δ 39.7 (d, *J* = 30.0 Hz), -19.6 (d, *J* = 30.0 Hz).

**HRMS (ESI, m/Z):** calcd. for C<sub>28</sub>H<sub>29</sub>O<sub>2</sub>P<sub>2</sub> [M+H]<sup>+</sup>: 459.1637, found: 459.1638.

**HPLC:** Chiracel-ADH, *n*-heptane/*i*-PrOH 80:20, 1.0 mL/min., 40 °C, detection at 207 nm. Retention time (min): 31.6 (minor) and 38.3 (major). (Due to the poor separation of the product **3ta** in the HPLC, the ee of this compound was determined from the corresponding oxidized derivative.)

#### <Chromatogram>

mAU

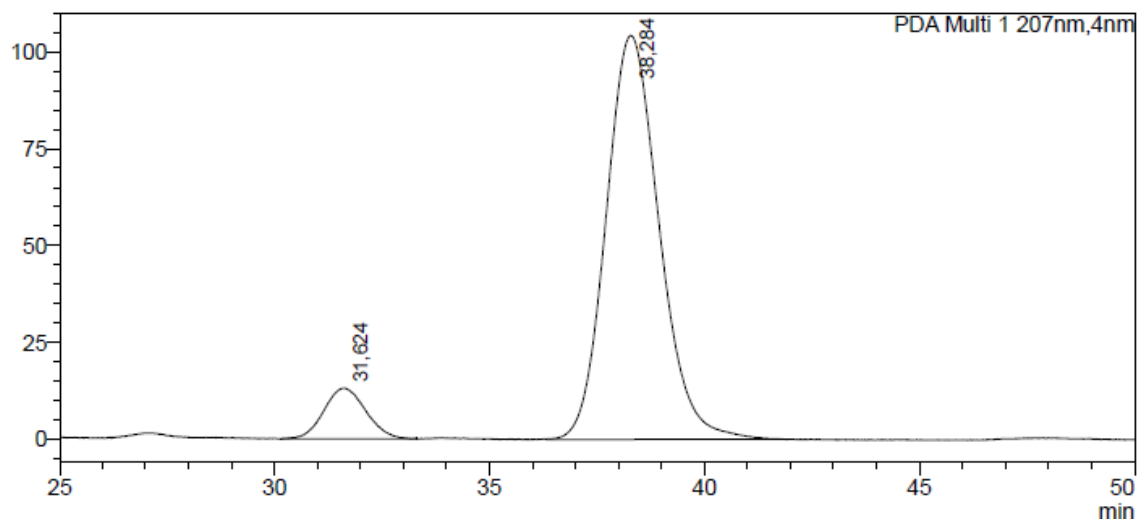

#### <Peak Table>

PDA Ch1 207nm

| Peak# | Ret. Time | Area    | Height | Area%   |
|-------|-----------|---------|--------|---------|
| 1     | 31,624    | 884925  | 13047  | 8,999   |
| 2     | 38,284    | 8948920 | 104200 | 91,001  |
| Total |           | 9833845 | 117247 | 100,000 |

### <Chromatogram>

mAU

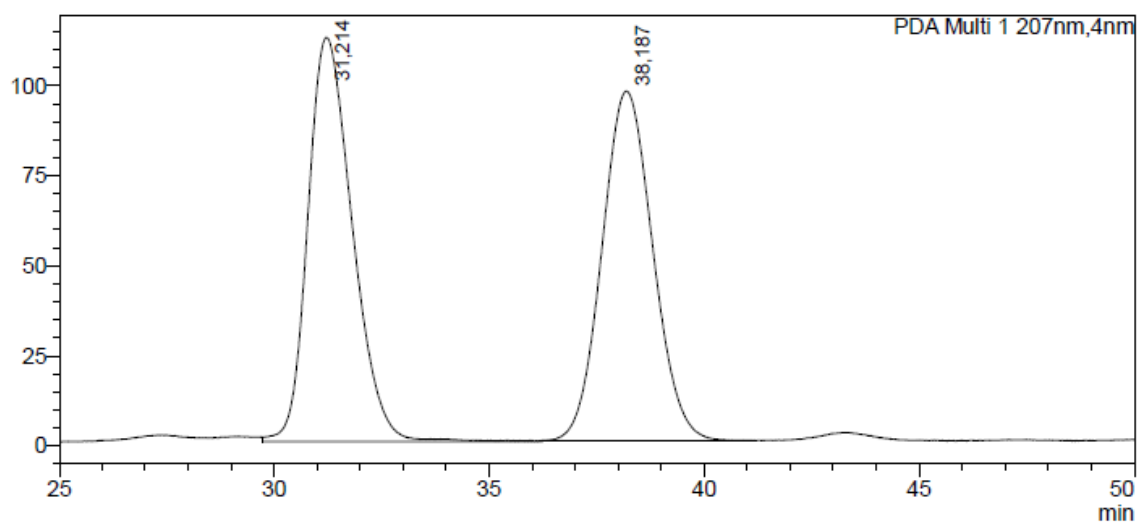

### <Peak Table>

PDA Ch1 207nm

| Peak# | Ret. Time | Area     | Height | Area%   |
|-------|-----------|----------|--------|---------|
| 1     | 31,214    | 8067998  | 112164 | 50,305  |
| 2     | 38,187    | 7970298  | 97014  | 49,695  |
| Total |           | 16038296 | 209178 | 100,000 |

UV Spectrum

Peak# : 1  
Retention Time : 31,214 min  
Compound Name :  
Spectrum Operation:

mAU

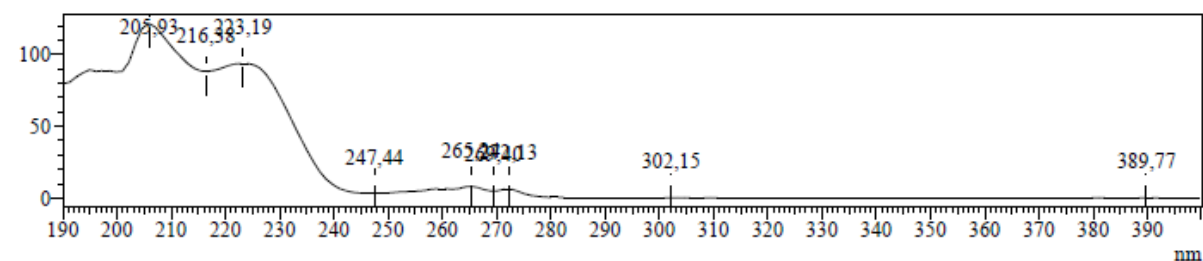

Peak# : 2  
Retention Time : 38,187 min  
Compound Name :  
Spectrum Operation:

mAU

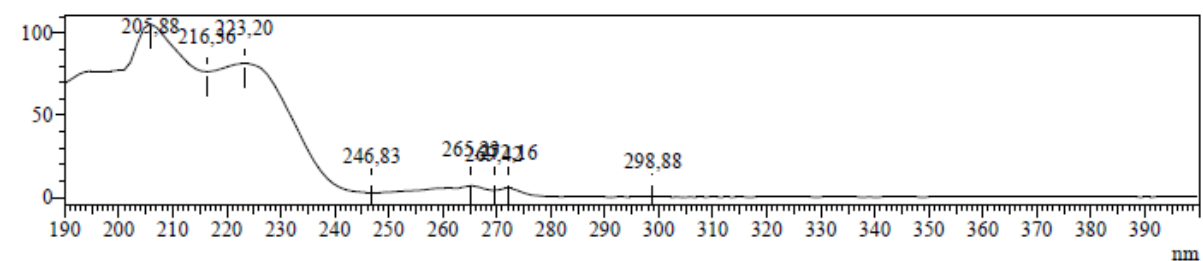

**(S)-5-(diphenylphosphaneyl)-4-(diphenylphosphoryl)pentanenitrile (3ua)**

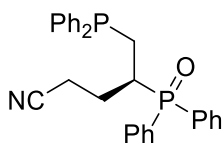

**Following general procedure A:** The reaction was performed with **1u** (0.1 mmol, 1 equiv.), manganese catalyst (0.005 mmol, 5 mol%), *t*PentOK (0.01 mmol, 10 mol%), **2a** (0.105 mmol, 1.05 equiv.), toluene (1.0 mL) at 25°C for 72 h. Product **3ua** was obtained as a white solid after column chromatography (SiO<sub>2</sub>, pentane/ethyl acetate/methanol = 1:1:0.05) [93% yield, >99% ee].

**<sup>1</sup>H NMR (CDCl<sub>3</sub>, 400 MHz):** δ 7.69 – 7.59 (m, 2H, CH<sub>Ar</sub>), 7.55 – 7.39 (m, 7H, CH<sub>Ar</sub>), 7.41 – 7.22 (m, 11H, CH<sub>Ar</sub>), 2.69 – 2.45 (m, 2H), 2.43 – 2.26 (m, 3H), 2.24 – 2.04 (m, 2H).

**<sup>13</sup>C NMR (CDCl<sub>3</sub>, 101 MHz):** δ 137.7, 137.6, 136.4, 136.2, 134.3, 134.1, 132.2, 132.1, 132.1, 131.9, 131.9, 131.9, 131.7, 131.4, 131.3, 130.9, 130.8, 130.7, 130.6, 130.4, 129.8, 129.1, 129.0, 128.9, 128.8, 128.8, 128.7, 128.6, 128.6, 128.5, 119.3, 33.1, 33.0, 32.4, 32.3, 26.7, 26.6, 24.6, 24.5, 15.6, 15.6, 15.5. (Due to C–P coupling and the complexity of the spectrum, doublets cannot be assigned and they are listed as singlets)

**<sup>31</sup>P NMR (CDCl<sub>3</sub>, 162 MHz):** δ 35.5 (d, *J* = 29.3 Hz), -19.9 (d, *J* = 29.3 Hz).

**HRMS (ESI, *m/z*):** calcd. for C<sub>29</sub>H<sub>28</sub>NOP<sub>2</sub> [M+H]<sup>+</sup>: 468.1641, found: 468.1640.

**HPLC:** Chiracel-ADH, *n*-heptane/*i*-PrOH 80:20, 1.0 mL/min., 40 °C, detection at 207 nm. Retention time (min): 15.7 (major) and 21.7 (minor).

#### <Chromatogram>

mAU

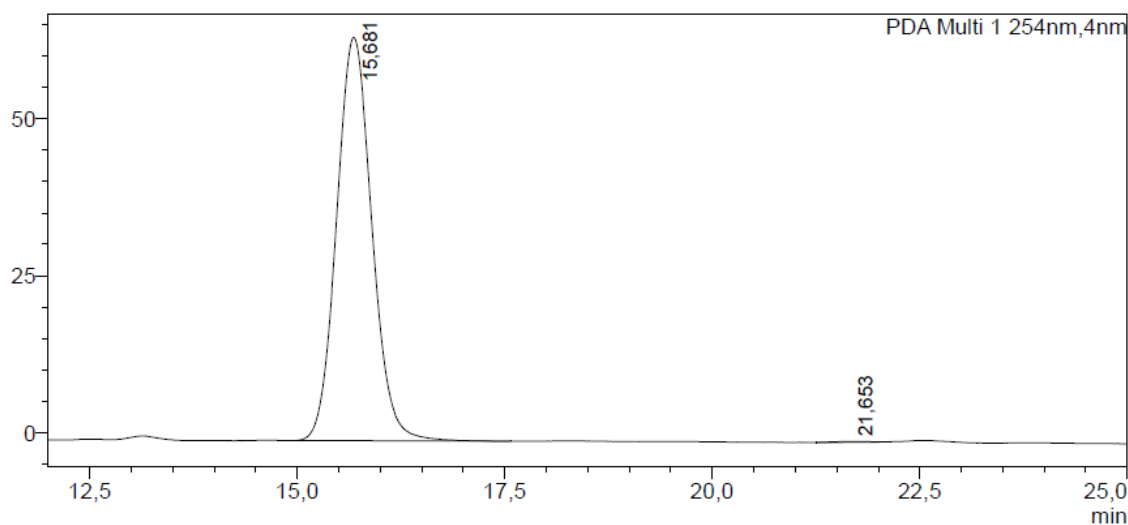

#### <Peak Table>

PDA Ch1 254nm

| Peak# | Ret. Time | Area    | Height | Area%   |
|-------|-----------|---------|--------|---------|
| 1     | 15,681    | 1897116 | 64126  | 99,849  |
| 2     | 21,653    | 2861    | 114    | 0,151   |
| Total |           | 1899977 | 64239  | 100,000 |



### <Chromatogram>

mAU

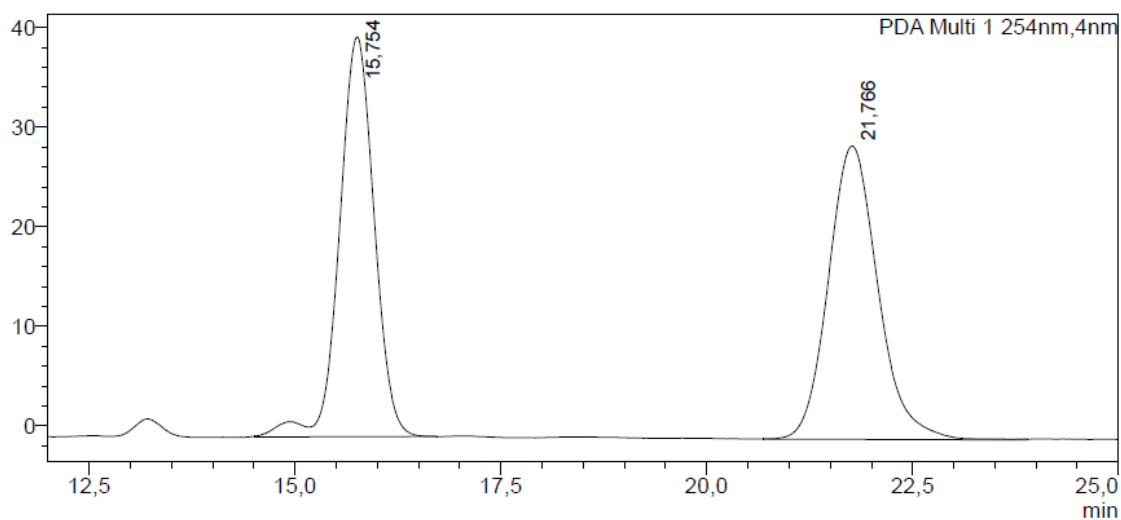

### <Peak Table>

PDA Ch1 254nm

| Peak# | Ret. Time | Area    | Height | Area%   |
|-------|-----------|---------|--------|---------|
| 1     | 15,754    | 1188768 | 40188  | 49,028  |
| 2     | 21,766    | 1235917 | 29485  | 50,972  |
| Total |           | 2424684 | 69673  | 100,000 |

### UV Spectrum

Peak# : 1  
Retention Time : 15,753 min  
Compound Name :  
Spectrum Operation:

mAU

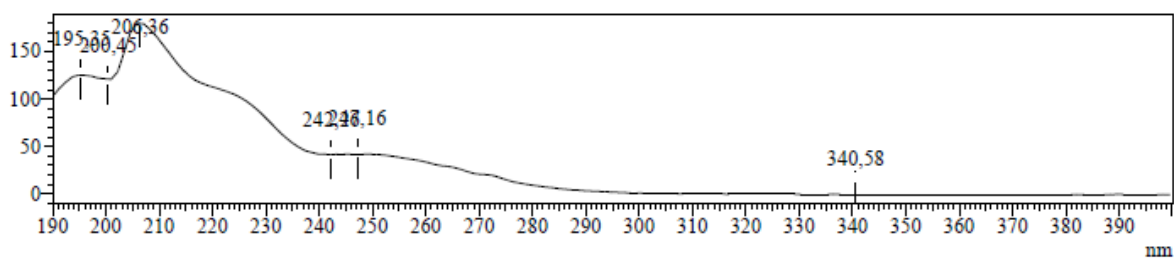

Peak# : 2  
Retention Time : 21,764 min  
Compound Name :  
Spectrum Operation:

mAU

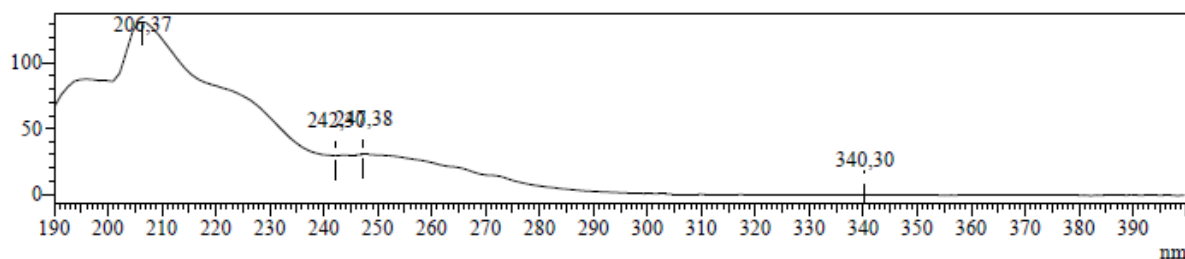

**(S)-(5-chloro-1-(diphenylphosphaneyl)pentan-2-yl)diphenylphosphine oxide (3va)**

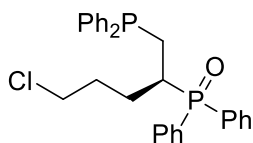

**Following general procedure A:** The reaction was performed with **1v** (0.1 mmol, 1 equiv.), manganese catalyst (0.005 mmol, 5 mol%), *t*PentOK (0.01 mmol, 10 mol%), **2a** (0.105 mmol, 1.05 equiv.), toluene (1.0 mL) at 25°C for 72 h. Product **3va** was obtained as a white solid after column chromatography (SiO<sub>2</sub>, pentane/ethyl acetate/methanol = 1:1:0.05) [88% yield, 93% ee].

**<sup>1</sup>H NMR (CDCl<sub>3</sub>, 400 MHz):** δ 7.70 – 7.59 (m, 2H, CH<sub>Ar</sub>), 7.56 – 7.21 (m, 18H, CH<sub>Ar</sub>), 3.34 (t, *J* = 6.2 Hz, 2H, ClCH<sub>2</sub>), 2.40 – 1.96 (m, 3H), 1.94 – 1.81 (m, 1H), 1.80 – 1.64 (m, 1H).

**<sup>13</sup>C NMR (CDCl<sub>3</sub>, 101 MHz):** δ 138.4, 138.3, 137.0, 136.8, 134.2, 134.0, 132.8, 132.2, 132.0, 131.8, 131.7, 131.7, 131.6, 131.6, 131.2, 131.0, 130.9, 130.9, 130.8, 129.5, 128.8, 128.7, 128.7, 128.6, 128.4, 128.4, 128.3, 44.9, 34.0, 33.9, 33.3, 33.2, 30.3, 30.3, 30.3, 26.8, 26.7, 25.8, 25.7, 25.7, 25.6. (Due to C–P coupling and the complexity of the spectrum, doublets cannot be assigned and they are listed as singlets)

**<sup>31</sup>P NMR (CDCl<sub>3</sub>, 162 MHz):** δ 35.9 (d, *J* = 31.0 Hz), -19.2 (d, *J* = 31.0 Hz).

**HRMS (ESI, *m/z*):** calcd. for C<sub>29</sub>H<sub>30</sub>ClOP<sub>2</sub> [M+H]<sup>+</sup>: 491,1455, found: 491,1455.

**HPLC:** Chiracel-ADH, *n*-heptane/*i*-PrOH 80:20, 1.0 mL/min., 40 °C, detection at 206 nm. Retention time (min): 16.9 (minor) and 18.6 (major).

#### <Chromatogram>

mAU

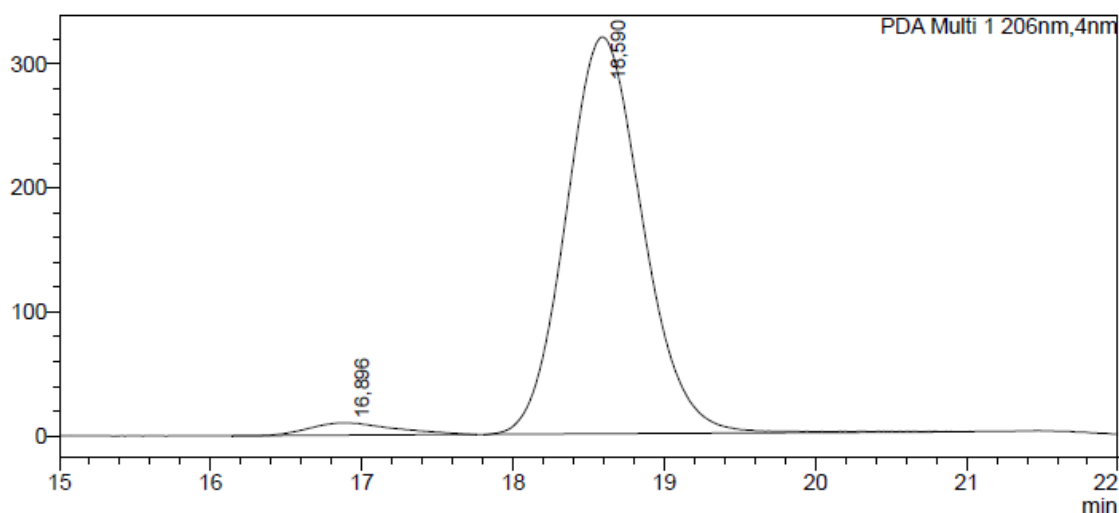

#### <Peak Table>

PDA Ch1 206nm

| Peak# | Ret. Time | Area     | Height | Area%   |
|-------|-----------|----------|--------|---------|
| 1     | 16,896    | 389883   | 9986   | 3,345   |
| 2     | 18,590    | 11265734 | 319743 | 96,655  |
| Total |           | 11655617 | 329729 | 100,000 |

### <Chromatogram>

mAU

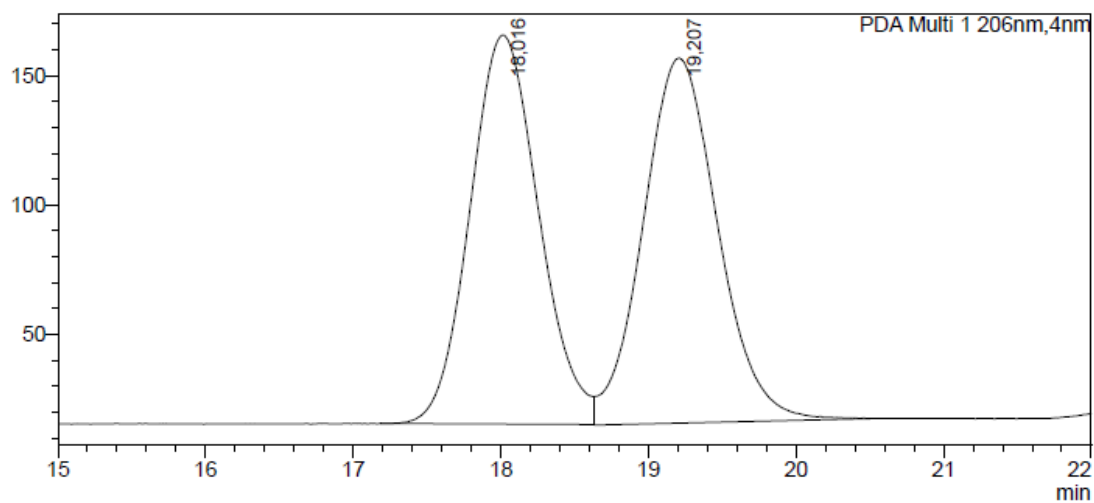

### <Peak Table>

PDA Ch1 206nm

| Peak# | Ret. Time | Area    | Height | Area%   |
|-------|-----------|---------|--------|---------|
| 1     | 18,016    | 4865627 | 150228 | 49,463  |
| 2     | 19,207    | 4971235 | 140871 | 50,537  |
| Total |           | 9836862 | 291099 | 100,000 |

UV Spectrum

Peak# : 1  
Retention Time : 18,016 min  
Compound Name :  
Spectrum Operation:

mAU

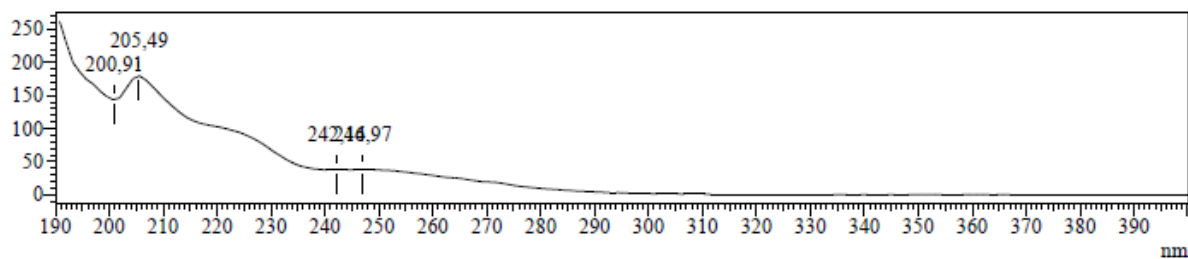

Peak# : 2  
Retention Time : 19,207 min  
Compound Name :  
Spectrum Operation:

mAU

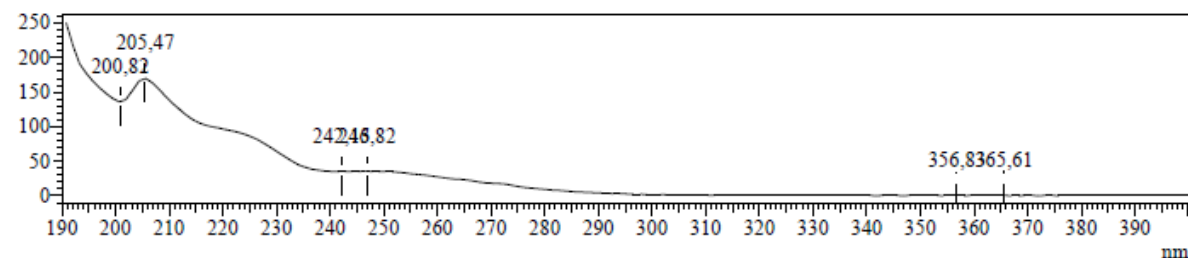

**(S)-(2-(diphenylphosphanyl)-1-phenylethyl)di-p-tolylphosphine oxide (3wa)**

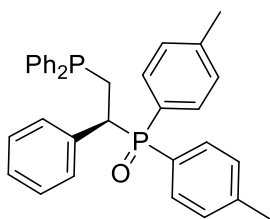

**Following general procedure A:** The reaction was performed with **1w** (0.1 mmol, 1 equiv.), manganese catalyst (0.0025 mmol, 2.5 mol%), *t*PentOK (0.005 mmol, 5 mol%), **2a** (0.105 mmol, 1.05 equiv.), toluene (1.0 mL) at 25°C for 72 h. Product **3wa** was obtained as a white solid after column chromatography (SiO<sub>2</sub>, pentane/ethyl acetate/methanol = 1:1:0.05) [87% yield, 98% ee].

**<sup>1</sup>H NMR (CDCl<sub>3</sub>, 400 MHz):** δ 7.49 – 7.39 (m, 3H, CH<sub>Ar</sub>), 7.38 – 7.25 (m, 4H, CH<sub>Ar</sub>), 7.23 – 7.14 (m, 12H, CH<sub>Ar</sub>), 7.12 – 7.02 (m, 2H, CH<sub>Ar</sub>), 6.97 – 6.88 (m, 2H, CH<sub>Ar</sub>), 3.28 – 3.12 (m, 1H, P(O)Ph<sub>2</sub>CH), 2.93 – 2.72 (m, 1H, PPh<sub>2</sub>CHH), 2.65 – 2.47 (m, 1H, PPh<sub>2</sub>CHH), 2.40 (s, 3H, CH<sub>3</sub>), 2.20 (s, 3H, CH<sub>3</sub>).

**<sup>13</sup>C NMR (CDCl<sub>3</sub>, 101 MHz):** δ 142.2, 142.2, 141.6, 141.6, 139.1, 138.9, 137.4, 137.3, 135.8, 135.7, 135.7, 135.7, 134.6, 134.4, 131.9, 131.8, 131.5, 131.4, 131.1, 131.0, 130.2, 130.1, 129.6, 129.5, 128.8, 128.8, 128.7, 128.7, 128.4, 128.4, 128.3, 128.2, 128.0, 127.8, 127.4, 127.3, 44.0, 43.8, 43.3, 43.2, 29.2, 29.1, 29.0, 29.0, 21.8, 21.7, 21.6, 21.5. (Due to C–P coupling and the complexity of the spectrum, doublets cannot be assigned and they are listed as singlets)

**<sup>31</sup>P NMR (CDCl<sub>3</sub>, 162 MHz):** δ 30.8 (d, *J* = 31.1 Hz), -22.6 (d, *J* = 31.1 Hz).

**HRMS (ESI, *m/z*):** calcd. for C<sub>34</sub>H<sub>33</sub>OP<sub>2</sub> [M+H]<sup>+</sup>: 519.2001, found: 519.2003.

**HPLC:** Chiracel-ADH, *n*-heptane/*i*-PrOH 80:20, 1.0 mL/min., 40 °C, detection at 206 nm. Retention time (min): 20.7 (minor) and 31.0 (major).

#### <Chromatogram>

mAU

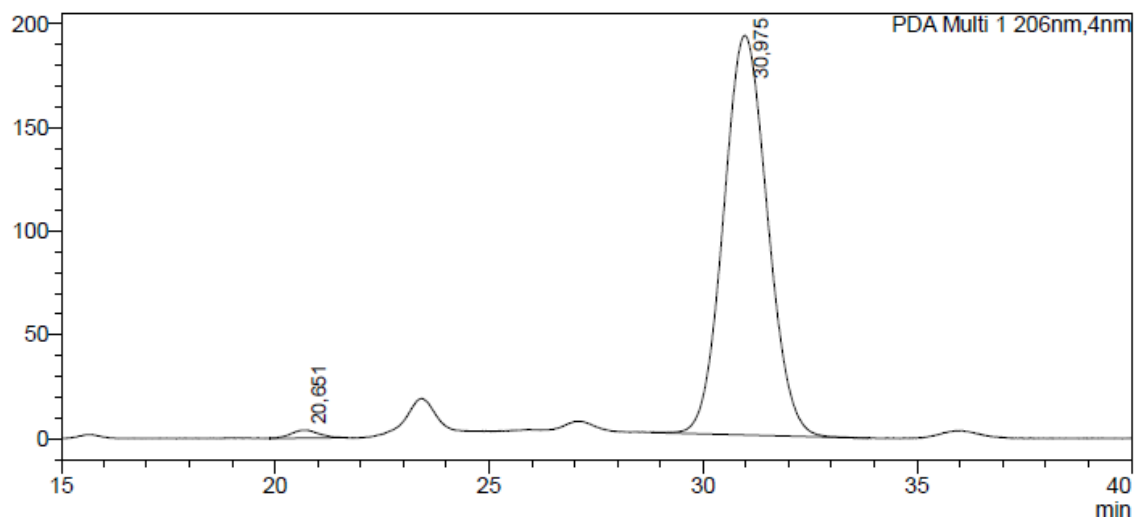

#### <Peak Table>

PDA Ch1 206nm

| Peak# | Ret. Time | Area     | Height | Area%   |
|-------|-----------|----------|--------|---------|
| 1     | 20,651    | 171546   | 3840   | 1,231   |
| 2     | 30,975    | 13759361 | 192617 | 98,769  |
| Total |           | 13930906 | 196457 | 100,000 |

### <Chromatogram>

mAU

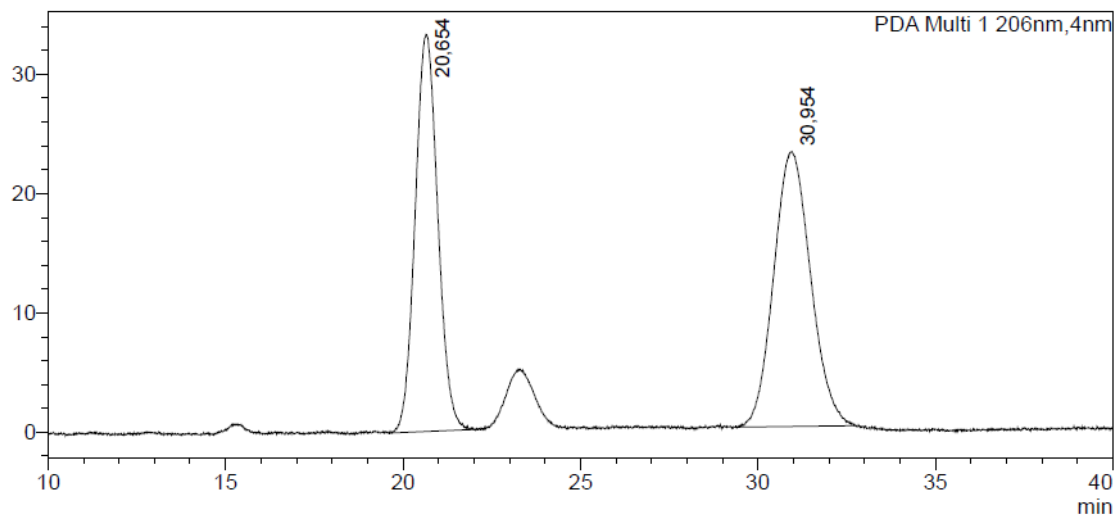

### <Peak Table>

PDA Ch1 206nm

| Peak# | Ret. Time | Area    | Height | Area%   |
|-------|-----------|---------|--------|---------|
| 1     | 20,654    | 1477393 | 33290  | 46,909  |
| 2     | 30,954    | 1672081 | 23072  | 53,091  |
| Total |           | 3149474 | 56362  | 100,000 |

UV Spectrum

Peak# : 1  
Retention Time : 20,654 min  
Compound Name :  
Spectrum Operation:

mAU

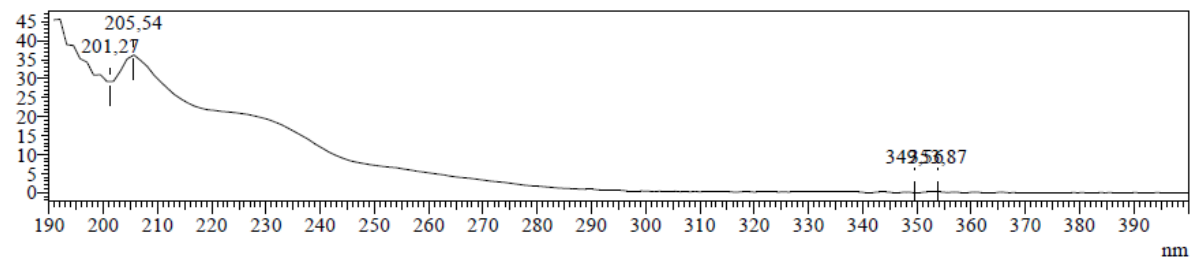

Peak# : 2  
Retention Time : 30,954 min  
Compound Name :  
Spectrum Operation:

mAU

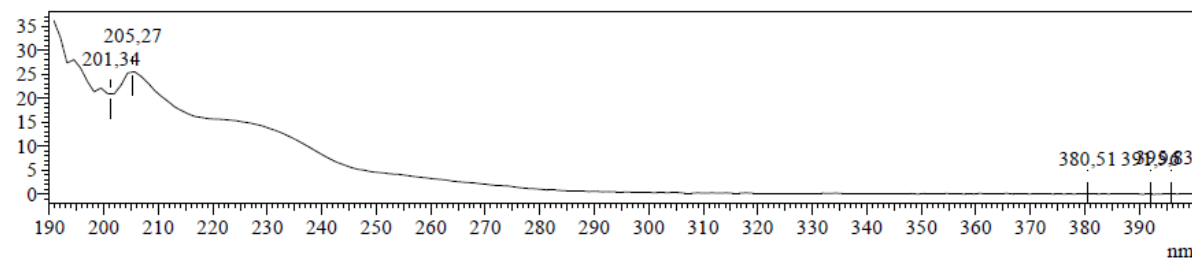

**(S)-bis(4-chlorophenyl)(2-(diphenylphosphaneyl)-1-phenylethyl)phosphine oxide (3xa)**

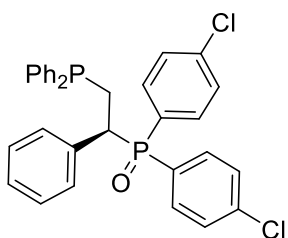

**Following general procedure A:** The reaction was performed with **1x** (0.1 mmol, 1 equiv.), manganese catalyst (0.0025 mmol, 2.5 mol%), *t*PentOK (0.005 mmol, 5 mol%), **2a** (0.105 mmol, 1.05 equiv.), toluene (1.0 mL) at 25°C for 72 h. Product **3xa** was obtained as a white solid after column chromatography (SiO<sub>2</sub>, pentane/ethyl acetate/methanol = 1:1:0.05) [90% yield, 98% ee].

**<sup>1</sup>H NMR (CDCl<sub>3</sub>, 400 MHz):** δ 7.50 – 7.28 (m, 8H, CH<sub>Ar</sub>), 7.27 – 7.07 (m, 15H, CH<sub>Ar</sub>), 3.29 – 3.08 (m, 1H, P(O)Ph<sub>2</sub>CH), 2.96 – 2.71 (m, 1H, PPh<sub>2</sub>CHH), 2.59 – 2.37 (m, 1H, PPh<sub>2</sub>CHH).

**<sup>13</sup>C NMR (CDCl<sub>3</sub>, 101 MHz):** δ 138.6, 138.6, 138.3, 138.1, 138.0, 138.0, 137.3, 137.1, 134.8, 134.8, 134.7, 134.7, 134.4, 134.2, 132.6, 132.6, 132.2, 132.1, 131.8, 131.6, 130.7, 129.9, 129.9, 129.8, 129.7, 129.2, 129.1, 128.9, 128.8, 128.7, 128.6, 128.6, 128.4, 128.3, 128.2, 128.1, 127.7, 127.6, 43.7, 43.6, 43.1, 42.9, 29.1, 28.9. (Due to C–P coupling and the complexity of the spectrum, doublets cannot be assigned and they are listed as singlets)

**<sup>31</sup>P NMR (CDCl<sub>3</sub>, 162 MHz):** δ 32.5 (d, *J* = 32.0 Hz), -19.9 (d, *J* = 32.0 Hz).

**HRMS (ESI, m/z):** calcd. for C<sub>32</sub>H<sub>27</sub>Cl<sub>2</sub>OP<sub>2</sub> [M+H]<sup>+</sup>: 559.0909, found: 559.0910.

**HPLC:** Chiracel-ODH, *n*-heptane/*i*-PrOH 95:05, 0.5 mL/min., 40 °C, detection at 225 nm. Retention time (min): 20.7 (major) and 24.4 (minor). (Due to the poor separation of the product **3xa** in the HPLC, the ee of this compound was determined from the corresponding oxidized derivative.)

#### <Chromatogram>

mAU

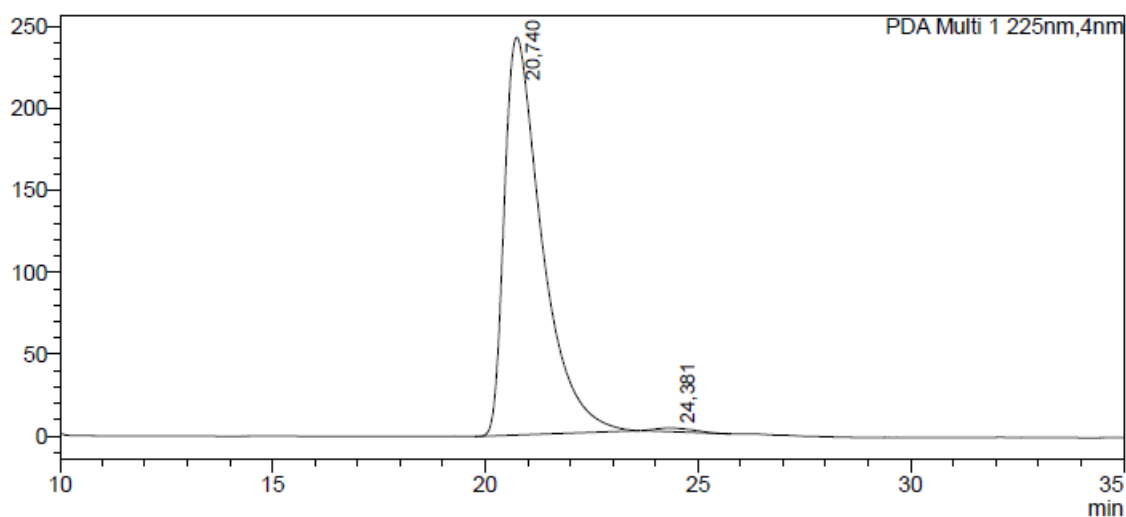

#### <Peak Table>

PDA Ch1 225nm

| Peak# | Ret. Time | Area     | Height | Area%   |
|-------|-----------|----------|--------|---------|
| 1     | 20,740    | 14942894 | 242870 | 99,071  |
| 2     | 24,381    | 140070   | 2279   | 0,929   |
| Total |           | 15082965 | 245149 | 100,000 |

### <Chromatogram>

mAU

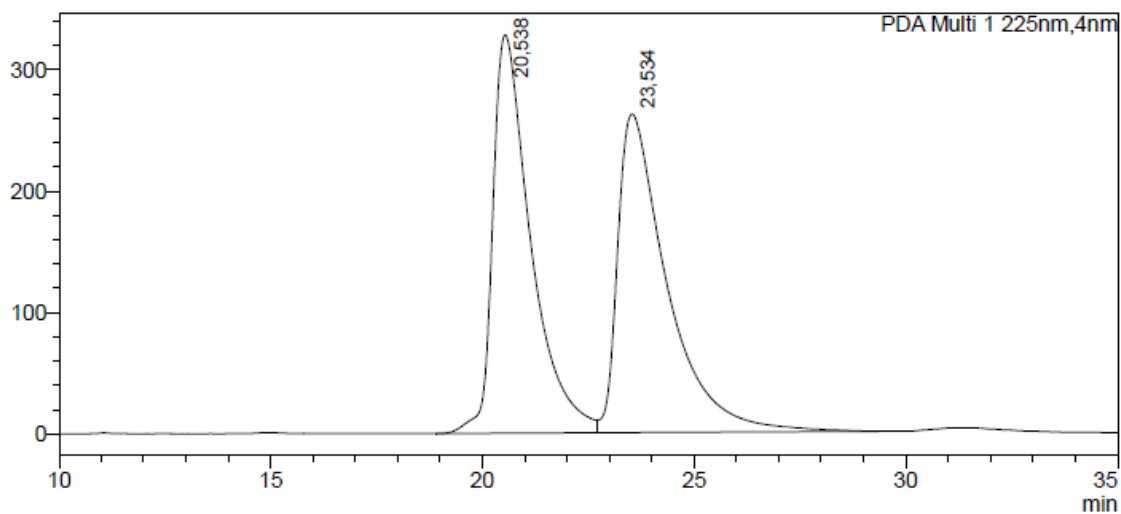

### <Peak Table>

PDA Ch1 225nm

| Peak# | Ret. Time | Area     | Height | Area%   |
|-------|-----------|----------|--------|---------|
| 1     | 20,538    | 20500925 | 328160 | 49,037  |
| 2     | 23,534    | 21305933 | 262482 | 50,963  |
| Total |           | 41806858 | 590642 | 100,000 |

UV Spectrum

Peak# : 1  
Retention Time : 20,538 min  
Compound Name :  
Spectrum Operation:

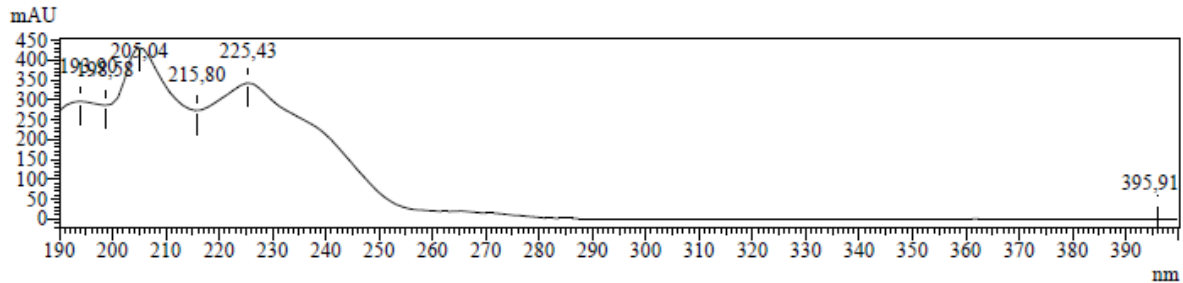

Peak# : 2  
Retention Time : 23,534 min  
Compound Name :  
Spectrum Operation:

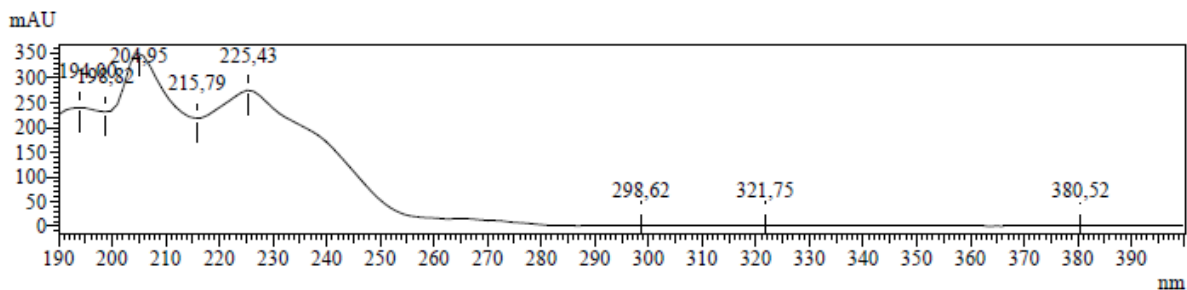

**(S)-(2-(diphenylphosphanyl)-1-phenylethyl)di(naphthalen-2-yl)phosphine oxide (3ya)**

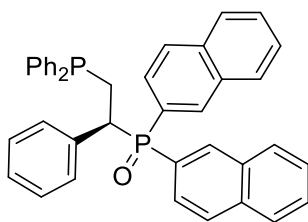

**Following general procedure A:** The reaction was performed with **1y** (0.1 mmol, 1 equiv.), manganese catalyst (0.005 mmol, 5 mol%), *t*PentOK (0.01 mmol, 10 mol%), **2a** (0.105 mmol, 1.05 equiv.), toluene (1.0 mL) at 25°C for 72 h. Product **3ya** was obtained as a white solid after column chromatography (SiO<sub>2</sub>, pentane/ethyl acetate/methanol = 1:1:0.05) [95% yield, >99% ee].

**<sup>1</sup>H NMR (CDCl<sub>3</sub>, 400 MHz):** δ 8.41 (d, *J* = 12.5 Hz, 1H, CH<sub>Ar</sub>), 7.94 – 7.84 (m, 4H, CH<sub>Ar</sub>), 7.71 – 7.50 (m, 6H, CH<sub>Ar</sub>), 7.48 – 7.36 (m, 3H, CH<sub>Ar</sub>), 7.35 – 7.21 (m, 7H, CH<sub>Ar</sub>), 7.20 – 7.10 (m, 8H, CH<sub>Ar</sub>), 3.59 – 3.40 (m, 1H, P(O)Ph<sub>2</sub>CH), 3.05 – 2.85 (m, 1H, PPh<sub>2</sub>CHH), 2.75 – 2.58 (m, 1H, PPh<sub>2</sub>CHH).

**<sup>13</sup>C NMR (CDCl<sub>3</sub>, 101 MHz):** δ 138.9, 138.7, 137.3, 137.1, 135.5, 135.5, 135.4, 135.4, 134.8, 134.8, 134.3, 134.3, 133.8, 133.8, 133.3, 133.2, 132.8, 132.7, 132.3, 132.2, 131.9, 131.7, 130.2, 130.2, 129.9, 129.9, 129.7, 129.1, 129.1, 128.9, 128.9, 128.8, 128.7, 128.6, 128.6, 128.4, 128.3, 128.3, 128.2, 128.1, 128.0, 127.8, 127.7, 127.6, 127.5, 127.1, 126.6, 126.1, 126.0, 125.9, 125.8, 43.9, 43.7, 43.2, 43.1, 29.2, 29.1. (Due to C–P coupling and the complexity of the spectrum, doublets cannot be assigned and they are listed as singlets)

**<sup>31</sup>P NMR (CDCl<sub>3</sub>, 162 MHz)** δ 30.8 (d, *J* = 31.0 Hz), -22.8 (d, *J* = 31.0 Hz).

**HRMS (ESI, m/z):** calcd. for C<sub>40</sub>H<sub>33</sub>OP<sub>2</sub> [M+H]<sup>+</sup>: 590.2001, found: 590.2008.

**HPLC:** Chiracel-OZH, *n*-heptane/*i*-PrOH 80:20, 0.5 mL/min., 40 °C, detection at 224 nm. Retention time (min): 18.9 (major) and 45.4 (minor). (Due to the poor separation of the product **3ya** in the HPLC, the ee of this compound was determined from the corresponding oxidized derivative.)



### <Chromatogram>

mAU

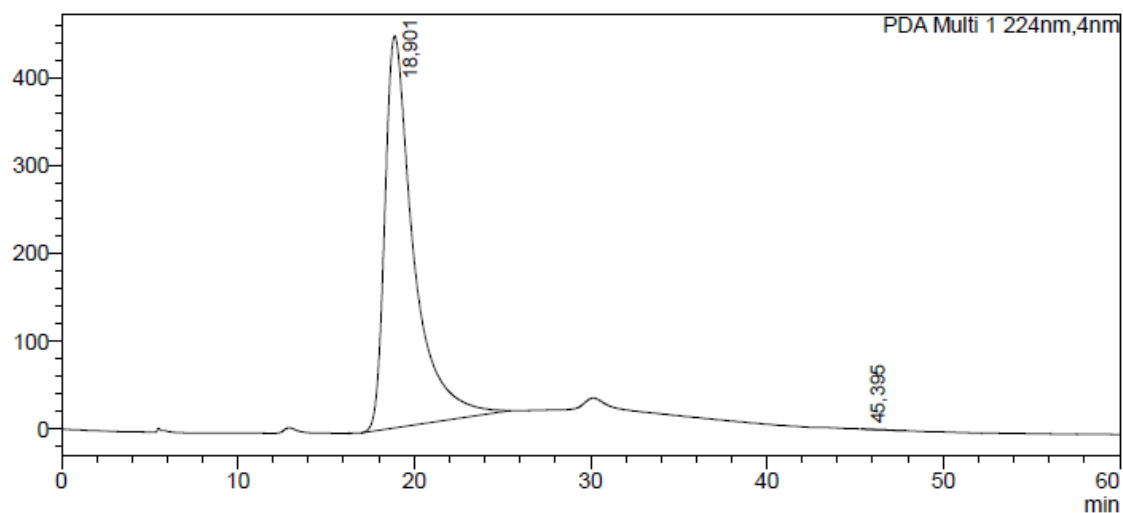

### <Peak Table>

PDA Ch1 224nm

| Peak# | Ret. Time | Area     | Height | Area%   |
|-------|-----------|----------|--------|---------|
| 1     | 18,901    | 50624455 | 446250 | 99,976  |
| 2     | 45,395    | 12373    | 131    | 0,024   |
| Total |           | 50636828 | 446381 | 100,000 |

### <Chromatogram>

mAU

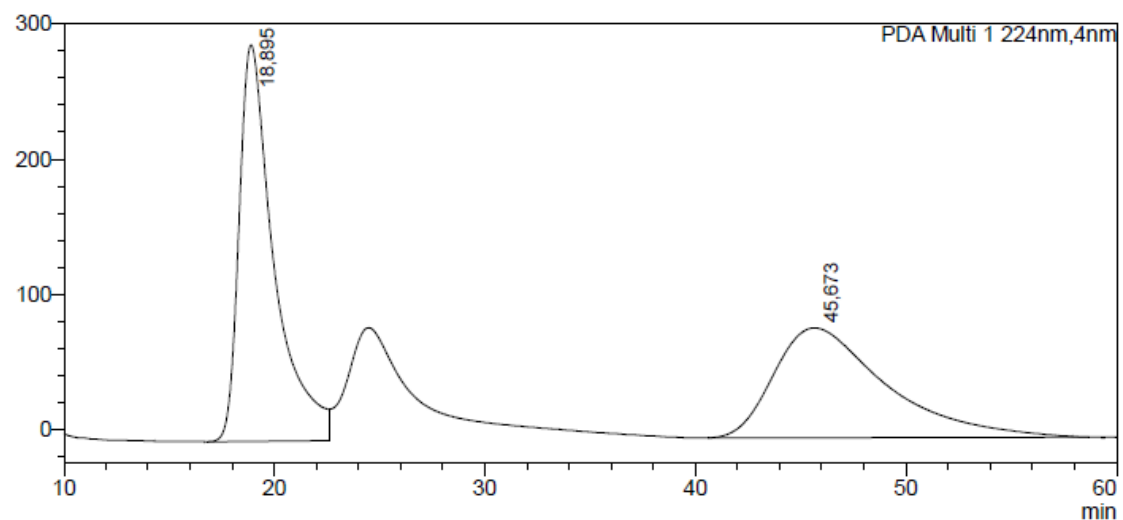

### <Peak Table>

PDA Ch1 224nm

| Peak# | Ret. Time | Area     | Height | Area%   |
|-------|-----------|----------|--------|---------|
| 1     | 18,895    | 33829336 | 292757 | 52,941  |
| 2     | 45,673    | 30070236 | 81148  | 47,059  |
| Total |           | 63899572 | 373905 | 100,000 |

## UV Spectrum

Peak# : 1  
Retention Time : 18,895 min  
Compound Name :  
Spectrum Operation:

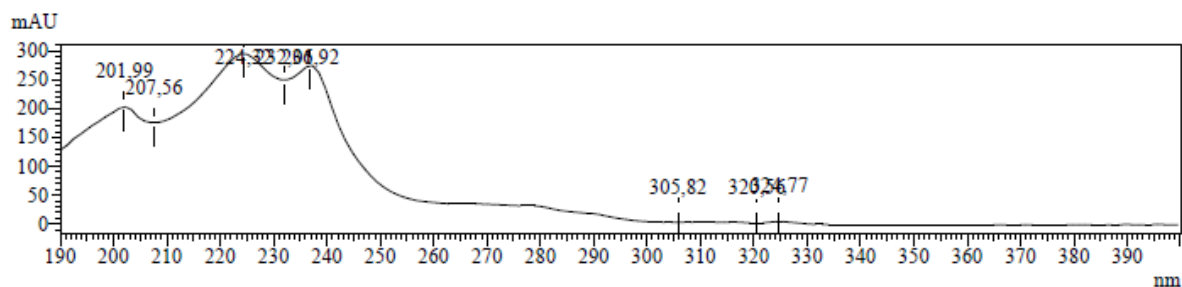

Peak# : 2  
Retention Time : 45,673 min  
Compound Name :  
Spectrum Operation:

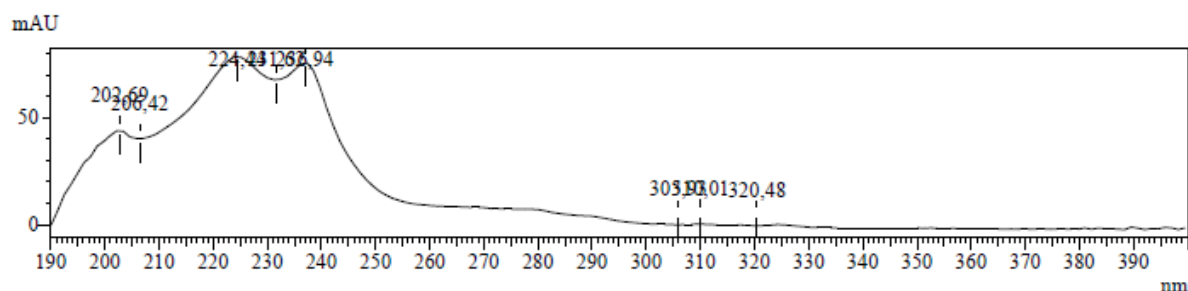**(S)-hexane-1,2-diylbis(diphenylphosphine oxide) (3za)**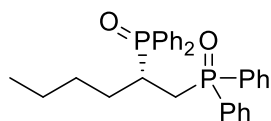

**Following general procedure A:** The reaction was performed with **1z** (0.1 mmol, 1 equiv.), manganese catalyst (0.005 mmol, 5 mol%), *t*PentOK (0.010 mmol, 10 mol%), **2a** (0.1 mmol, 1 equiv.), toluene (1.0 mL) at 60°C for 72 h. Then, the reaction mixture was quenched by 30% H<sub>2</sub>O<sub>2</sub> aqueous solution (25 μL) and was stirred for additional 30 minutes at room temperature. After solvent was removed under reduced pressure, the residue was purified by silica gel column chromatography (SiO<sub>2</sub>, pentane/ethyl acetate/methanol = 1:1:0.05) to give product **3za** as a white solid [82% yield, 87% ee].

**<sup>1</sup>H NMR (CDCl<sub>3</sub>, 400 MHz):** δ 7.83 – 7.65 (m, 6H, CH<sub>Ar</sub>), 7.54 – 7.30 (m, 14H, CH<sub>Ar</sub>), 3.07 – 2.89 (m, 1H, P(O)Ph<sub>2</sub>CH), 2.71 – 2.44 (m, 2H, P(O)Ph<sub>2</sub>CH<sub>2</sub>), 1.84 – 1.60 (m, 1H), 1.53 – 1.36 (m, 1H), 1.31 – 1.19 (m, 1H), 0.97 – 0.73 (m, 3H), 0.50 (t, *J* = 7.2 Hz, 3H, CH<sub>3</sub>).

**<sup>13</sup>C NMR (CDCl<sub>3</sub>, 101 MHz):** δ 134.0, 133.9, 133.0, 132.9, 132.7, 132.5, 131.9, 131.9, 131.8, 131.8, 131.7, 131.6, 131.3, 131.2, 131.1, 131.0, 130.9, 130.8, 130.8, 130.7, 31.7, 31.7, 31.0, 31.0, 29.2, 29.2, 28.1, 27.9, 27.2, 22.7, 13.5. (Due to C–P coupling and the complexity of the spectrum, doublets cannot be assigned and they are listed as singlets)

**<sup>31</sup>P NMR (CDCl<sub>3</sub>, 162 MHz):** δ 37.0 (d, *J* = 47.4 Hz), 30.0 (d, *J* = 47.4 Hz).

**HRMS (ESI, m/z):** calcd. for C<sub>30</sub>H<sub>32</sub>O<sub>2</sub>P<sub>2</sub>Na [M+Na]<sup>+</sup>: 509.1770, found: 509.1768.

**HPLC:** Chiracel-ADH, *n*-heptane/*i*-PrOH 80:20, 1.0 mL/min., 40 °C, detection at 208 nm. Retention time (min): 18.3 (major) and 23.3 (minor).

### <Chromatogram>

mAU

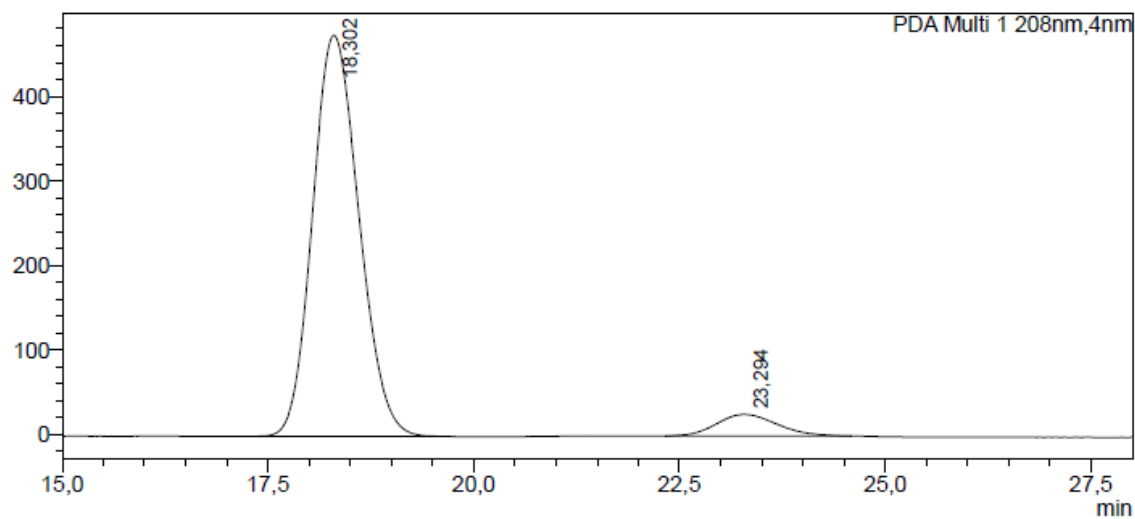

### <Peak Table>

PDA Ch1 208nm

| Peak# | Ret. Time | Area     | Height | Area%   |
|-------|-----------|----------|--------|---------|
| 1     | 18,302    | 18627278 | 474484 | 93,503  |
| 2     | 23,294    | 1294244  | 25449  | 6,497   |
| Total |           | 19921522 | 499932 | 100,000 |

### <Chromatogram>

mAU

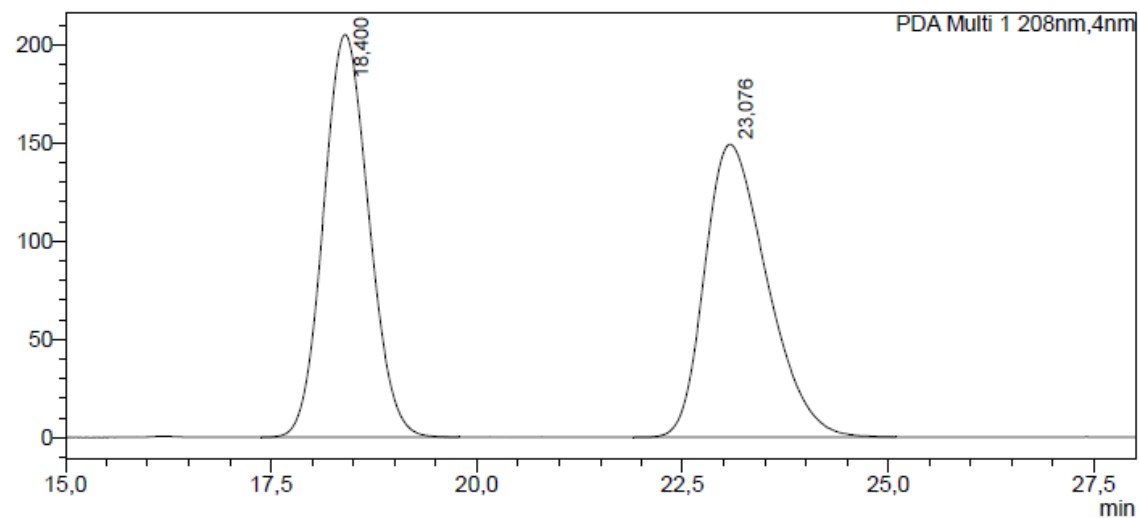

### <Peak Table>

PDA Ch1 208nm

| Peak# | Ret. Time | Area     | Height | Area%   |
|-------|-----------|----------|--------|---------|
| 1     | 18,400    | 7875796  | 204969 | 49,988  |
| 2     | 23,076    | 7879642  | 149129 | 50,012  |
| Total |           | 15755438 | 354098 | 100,000 |

## UV Spectrum

Peak# : 1  
 Retention Time : 18,400 min  
 Compound Name :  
 Spectrum Operation:

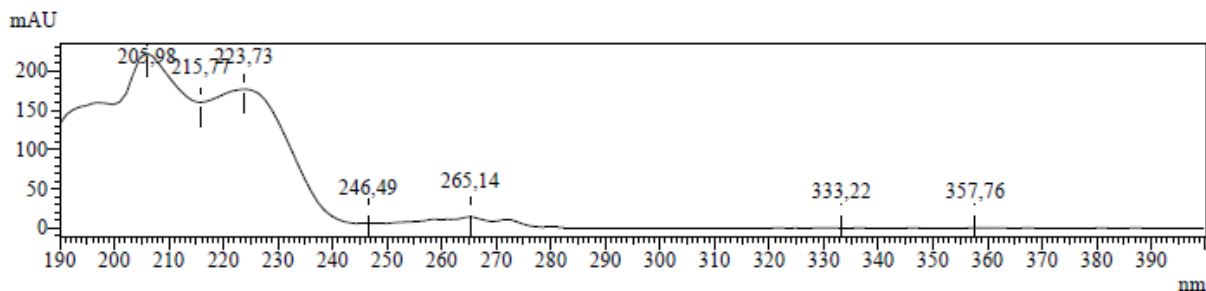

Peak# : 2  
 Retention Time : 23,076 min  
 Compound Name :  
 Spectrum Operation:

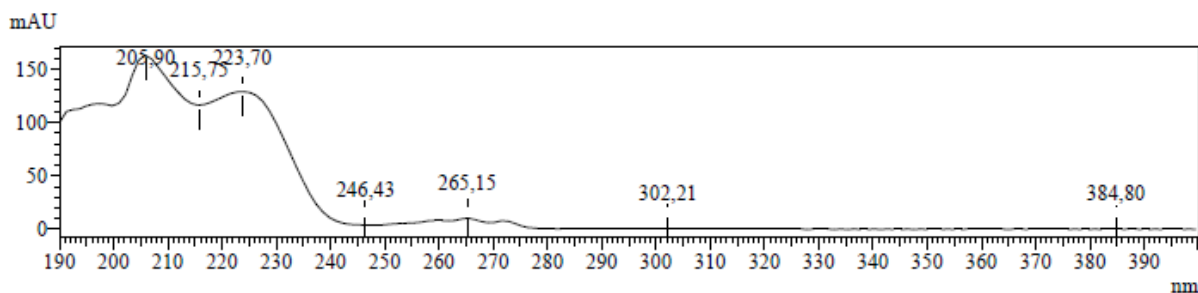

**dimethyl (S)-2-(2-(diphenylphosphanyl)-1-phenylethyl)phosphonate (4a'a)**

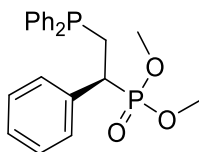

**Following general procedure A:** The reaction was performed with **1a'** (0.1 mmol, 1 equiv.), manganese catalyst (0.0025 mmol, 2.5 mol%), *t*PentOK (0.005 mmol, 5 mol%), **2a** (0.105 mmol, 1.05 equiv.), toluene (1.0 mL) at 25°C for 24 h. Product **4a'a** was obtained as colorless oil after column chromatography (SiO<sub>2</sub>, pentane/ethyl acetate = 1:1) [88% yield, 90% ee].

**<sup>1</sup>H NMR (CDCl<sub>3</sub>, 400 MHz):** δ 7.51 – 7.45 (m, 2H, CH<sub>Ar</sub>), 7.43 – 7.37 (m, 3H, CH<sub>Ar</sub>), 7.36 – 7.23 (m, 10H, CH<sub>Ar</sub>), 3.68 (d, *J* = 10.6 Hz, 3H, OCH<sub>3</sub>), 3.42 (d, *J* = 10.6 Hz, 3H, OCH<sub>3</sub>), 3.08 – 2.96 (m, 1H, P(O)(OCH<sub>3</sub>)<sub>2</sub>CH), 2.93 – 2.83 (m, 1H, PPh<sub>2</sub>CHH), 2.76 – 2.65 (m, 1H, PPh<sub>2</sub>CHH).

**<sup>13</sup>C NMR (CDCl<sub>3</sub>, 101 MHz):** δ 138.8, 138.7, 136.97, 136.9, 135.2, 135.2, 135.2, 135.2, 133.7, 133.6, 132.2, 132.1, 129.5, 129.5, 129.3, 128.7, 128.7, 128.6, 128.6, 128.3, 128.3, 127.6, 127.6, 53.6, 53.6, 52.7, 52.7, 41.5, 41.4, 40.6, 40.4, 29.2, 29.2, 29.1, 29.1. (Due to C–P coupling and the complexity of the spectrum, doublets cannot be assigned and they are listed as singlets)

**<sup>31</sup>P NMR (CDCl<sub>3</sub>, 162 MHz):** δ 30.4 (d, *J* = 43.3 Hz), -20.9 (d, *J* = 43.3 Hz).

**HRMS (ESI, m/z):** calcd. for C<sub>22</sub>H<sub>25</sub>O<sub>3</sub>P<sub>2</sub> [M+H]<sup>+</sup>: 399.1273, found: 399.1280.

**HPLC:** Chiracel-OJH, *n*-heptane/*i*-PrOH 90:10, 0.5 mL/min., 40 °C, detection at 221 nm. Retention time (min): 14.0 (major) and 22.0 (minor).

### <Chromatogram>

mAU

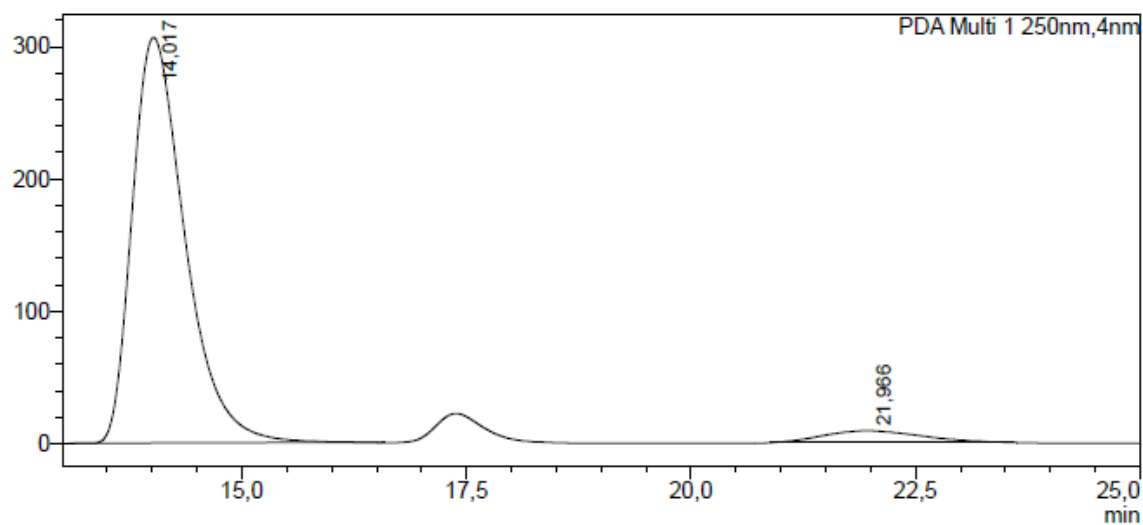

### <Peak Table>

PDA Ch1 250nm

| Peak# | Ret. Time | Area     | Height | Area%   |
|-------|-----------|----------|--------|---------|
| 1     | 14,017    | 12494368 | 306203 | 95,783  |
| 2     | 21,966    | 550104   | 8066   | 4,217   |
| Total |           | 13044472 | 314270 | 100,000 |

### <Chromatogram>

mAU

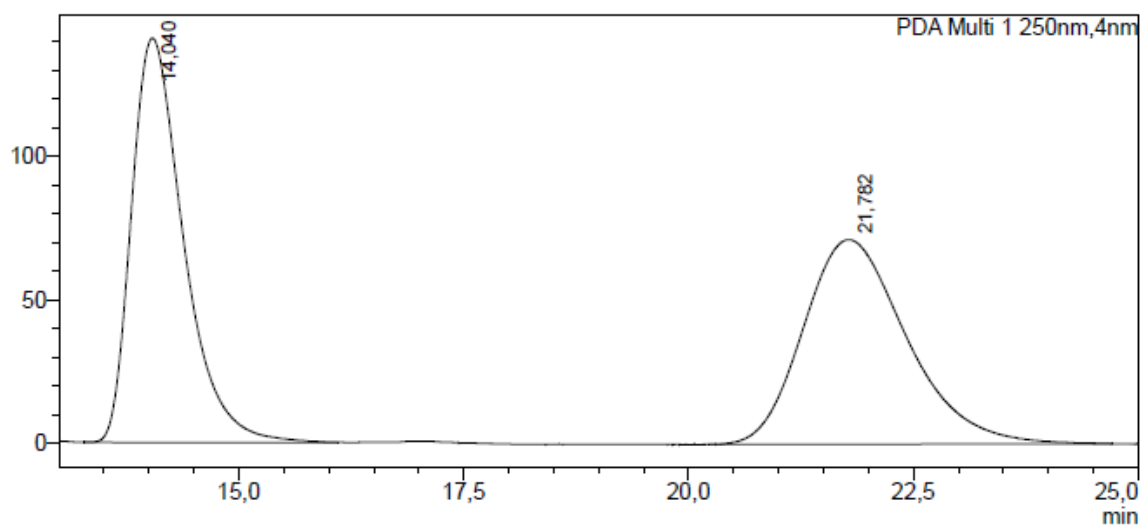

### <Peak Table>

PDA Ch1 250nm

| Ret. Time | Area     | Height | Area%   |
|-----------|----------|--------|---------|
| 14,040    | 5681470  | 140933 | 49,892  |
| 21,782    | 5706021  | 71312  | 50,108  |
|           | 11387491 | 212245 | 100,000 |

Peak# : 1  
Retention Time : 14,031 min  
Compound Name :  
Spectrum Operation:

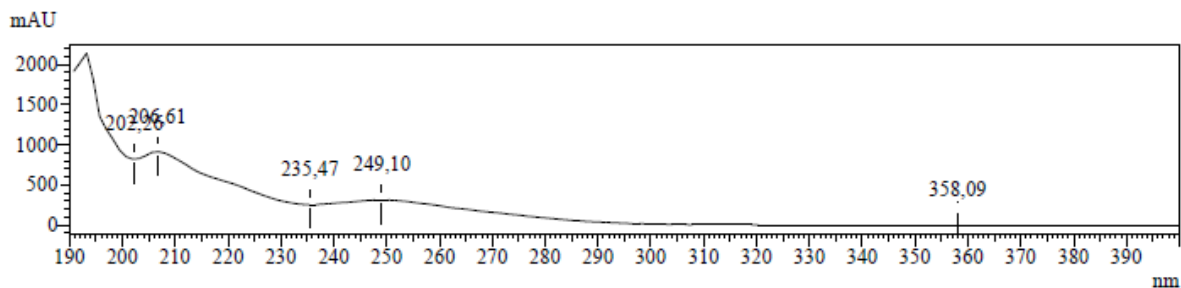

Peak# : 2  
Retention Time : 21,954 min  
Compound Name :  
Spectrum Operation:

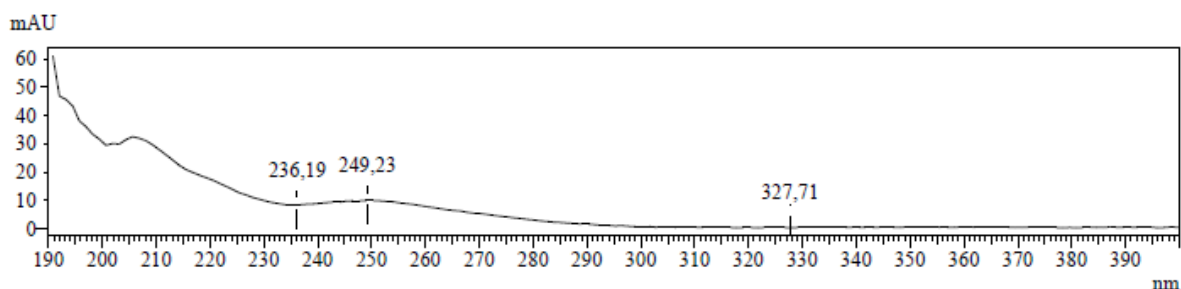

### diethyl (S)-(2-(diphenylphosphanyl)-1-phenylethyl)phosphonate (**4b'a**)

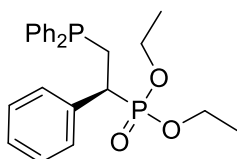

**Following general procedure A:** The reaction was performed with **1 b'** (0.1 mmol, 1 equiv.), manganese catalyst (0.0025 mmol, 2.5 mol%), *t*PentOK (0.005 mmol, 5 mol%), **2a** (0.105 mmol, 1.05 equiv.), toluene (1.0 mL) at 25°C for 24 h. Product **4b'a** was obtained as colorless oil after column chromatography (SiO<sub>2</sub>, pentane/ethyl acetate = 1:1) [75% yield, 89% ee].

**<sup>1</sup>H NMR (CDCl<sub>3</sub>, 400 MHz):** δ 7.54 – 7.45 (m, 2H, CH<sub>Ar</sub>), 7.43 – 7.36 (m, 3H, CH<sub>Ar</sub>), 7.35 – 7.22 (m, 10H, CH<sub>Ar</sub>), 4.11 – 4.03 (m, 1H, CH<sub>3</sub>CHCH), 4.03 – 3.95 (m, 1H, CH<sub>3</sub>CHCH), 3.91 – 3.82 (m, 1H, CH<sub>3</sub>CHCH), 3.68 – 3.57 (m, 1H, CH<sub>3</sub>CHCH), 3.03 – 2.94 (m, 1H, P(O)(OCH<sub>2</sub>CH<sub>3</sub>)<sub>2</sub>CH), 2.94 – 2.87 (m, 1H, PPh<sub>2</sub>CHH), 2.74 – 2.62 (m, 1H, PPh<sub>2</sub>CHH), 1.29 (t, *J* = 7.1 Hz, 3H, CH<sub>2</sub>CH<sub>3</sub>), 1.05 (t, *J* = 7.1 Hz, 3H, CH<sub>2</sub>CH<sub>3</sub>).

**<sup>13</sup>C NMR (CDCl<sub>3</sub>, 101 MHz):** δ 139.0, 138.9, 137.1, 137.0, 135.5, 135.5, 135.5, 135.5, 133.8, 133.6, 132.2, 132.0, 129.6, 129.5, 129.3, 128.7, 128.6, 128.5, 128.5, 128.3, 128.3, 128.2, 127.5, 127.5, 62.8, 62.8, 61.9, 61.9, 41.9, 41.8, 41.0, 40.9, 29.3, 29.3, 29.2, 29.2, 16.4, 16.4, 16.2, 16.2. (Due to C–P coupling and the complexity of the spectrum, doublets cannot be assigned and they are listed as singlets)

**<sup>31</sup>P NMR (CDCl<sub>3</sub>, 162 MHz):** δ 28.0 (d, *J* = 43.9 Hz), -20.8 (d, *J* = 43.9 Hz).

**HRMS (ESI, *m/z*):** calcd. for C<sub>24</sub>H<sub>29</sub>O<sub>3</sub>P<sub>2</sub> [M+H]<sup>+</sup>: 427.1586, found: 427.1594.

**HPLC:** Chiracel-ADH, *n*-heptane/*i*-PrOH 80:20, 1.0 mL/min., 40 °C, detection at 207 nm. Retention time (min): 5.2 (minor) and 5.7 (major).

### <Chromatogram>

mAU

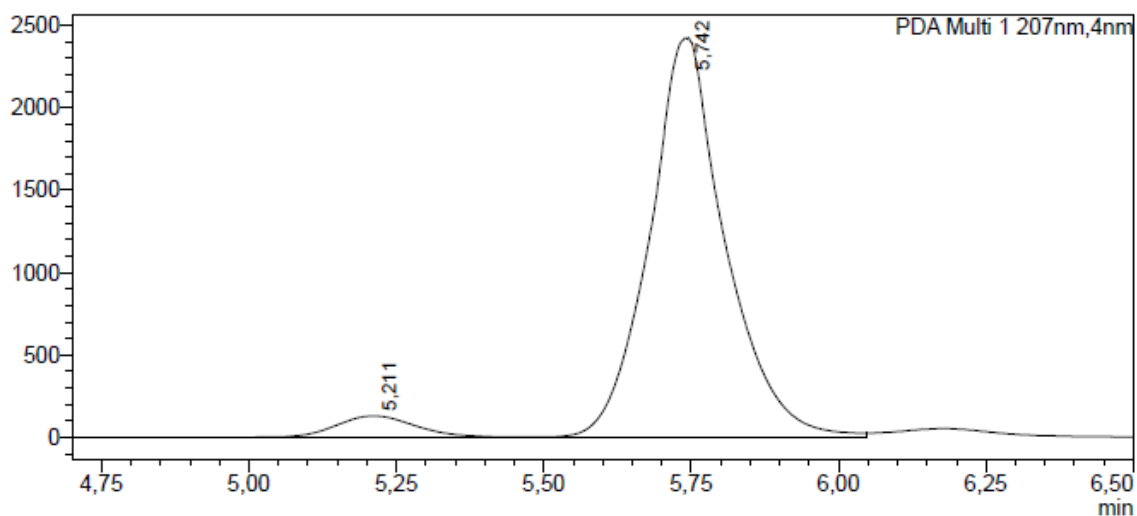

### <Peak Table>

PDA Ch1 207nm

| Peak# | Ret. Time | Area     | Height  | Area%   |
|-------|-----------|----------|---------|---------|
| 1     | 5,211     | 1296062  | 132007  | 5,629   |
| 2     | 5,742     | 21729204 | 2420890 | 94,371  |
| Total |           | 23025265 | 2552897 | 100,000 |

### <Chromatogram>

mAU

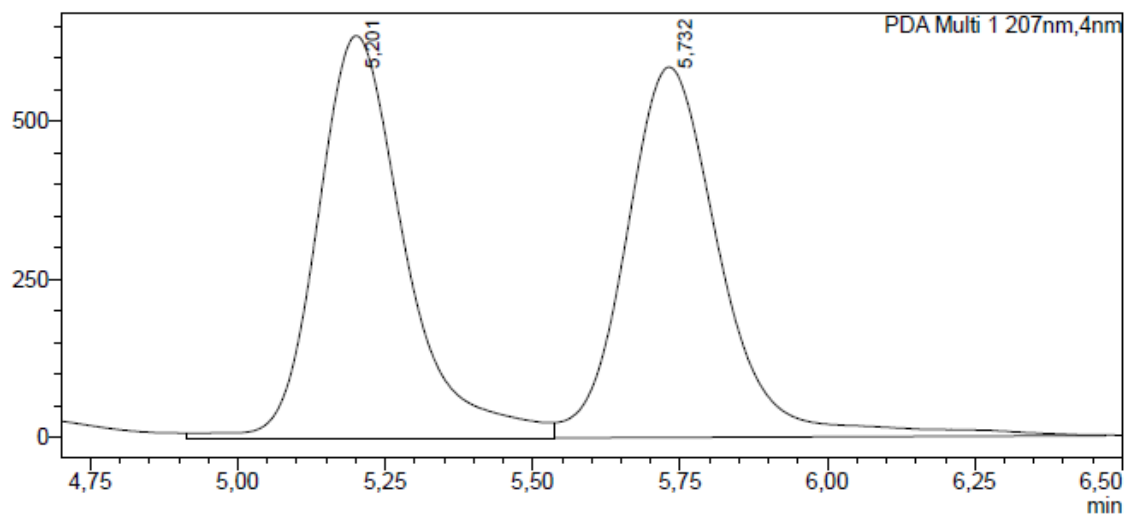

### <Peak Table>

PDA Ch1 207nm

| Peak# | Ret. Time | Area     | Height  | Area%   |
|-------|-----------|----------|---------|---------|
| 1     | 5,201     | 6556204  | 634994  | 50,008  |
| 2     | 5,732     | 6554120  | 585460  | 49,992  |
| Total |           | 13110325 | 1220453 | 100,000 |

Peak# : 1  
Retention Time : 5,201 min  
Compound Name :  
Spectrum Operation:

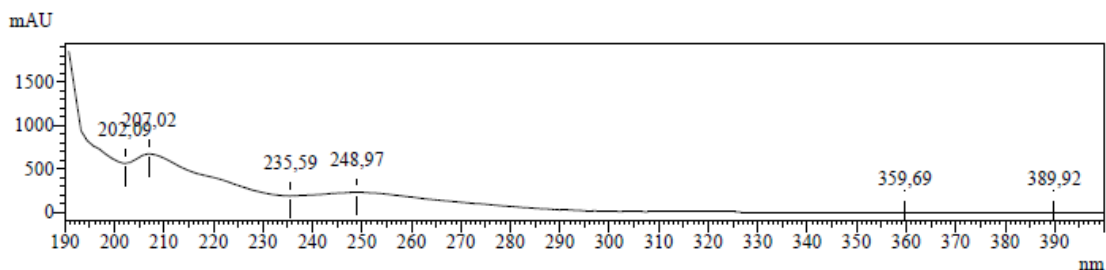

Peak# : 2  
Retention Time : 5,732 min  
Compound Name :  
Spectrum Operation:

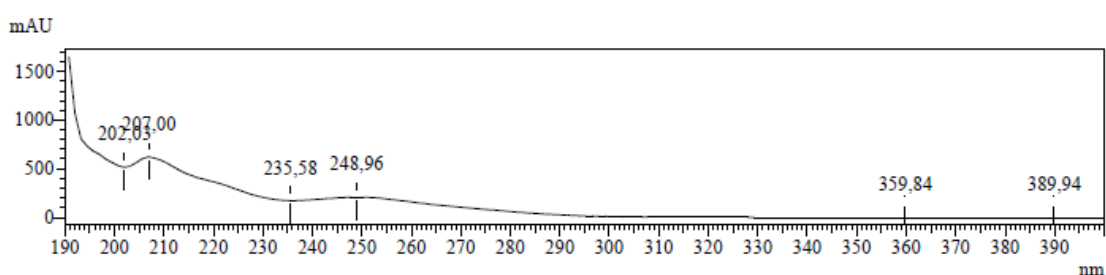

### dibenzyl (S)-(2-(diphenylphosphaneyl)-1-phenylethyl)phosphonate (**4c'a**)

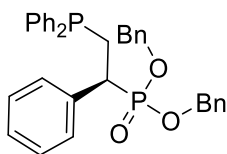

**Following general procedure A:** The reaction was performed with **1 c'** (0.1 mmol, 1 equiv.), manganese catalyst (0.0025 mmol, 2.5 mol%), *t*PentOK (0.005 mmol, 5 mol%), **2a** (0.105 mmol, 1.05 equiv.), toluene (1.0 mL) at 25°C for 24 h. Product **4c'a** was obtained as a white solid after column chromatography (SiO<sub>2</sub>, pentane/ethyl acetate = 2:1) [78% yield, 91% ee].

**<sup>1</sup>H NMR (CDCl<sub>3</sub>, 400 MHz):** δ 7.45 – 7.11 (m, 23H, CH<sub>Ar</sub>), 7.10 – 6.96 (m, 2H, CH<sub>Ar</sub>), 5.01 (dd, *J* = 11.8, 9.0 Hz, 1H, PhCHCH), 4.87 (dd, *J* = 11.8, 7.6 Hz, 1H, PhCHCH), 4.75 (dd, *J* = 11.8, 6.8 Hz, 1H, PhCHCH), 4.48 (dd, *J* = 11.8, 8.0 Hz, 1H, PhCHCH), 3.10 – 2.95 (m, 1H, P(O)(OBn)<sub>2</sub>CH), 2.90 – 2.80 (m, 1H, PPh<sub>2</sub>CHH), 2.69 – 2.56 (m, 1H, PPh<sub>2</sub>CHH).

**<sup>13</sup>C NMR (CDCl<sub>3</sub>, 101 MHz):** δ 139.3, 139.3, 139.2, 139.2, 137.3, 137.1, 136.9, 136.8, 136.8, 136.7, 135.7, 135.7, 135.6, 135.6, 134.2, 134.0, 132.6, 132.4, 130.1, 130.0, 129.7, 129.1, 129.0, 129.0, 129.0, 128.8, 128.8, 128.7, 128.7, 128.6, 128.4, 128.2, 128.1, 128.0, 68.7, 68.6, 67.9, 67.8, 42.8, 42.6, 41.4, 41.2, 29.6, 29.5, 29.4, 29.4. (Due to C–P coupling and the complexity of the spectrum, doublets cannot be assigned and they are listed as singlets)

**<sup>31</sup>P NMR (CDCl<sub>3</sub>, 162 MHz):** δ 25.9 (d, *J* = 44.6 Hz), -24.2 (d, *J* = 44.6 Hz).

**HRMS (ESI, m/z):** calcd. for C<sub>34</sub>H<sub>33</sub>O<sub>3</sub>P<sub>2</sub> [M+H]<sup>+</sup>: 551.1899, found: 551.1898.

**HPLC:** Chiracel-ODH, *n*-heptane/*i*-PrOH 90:10, 0.5 mL/min., 40 °C, detection at 250 nm. Retention time (min): 19.1 (minor) and 22.4 (major).



### <Chromatogram>

mAU

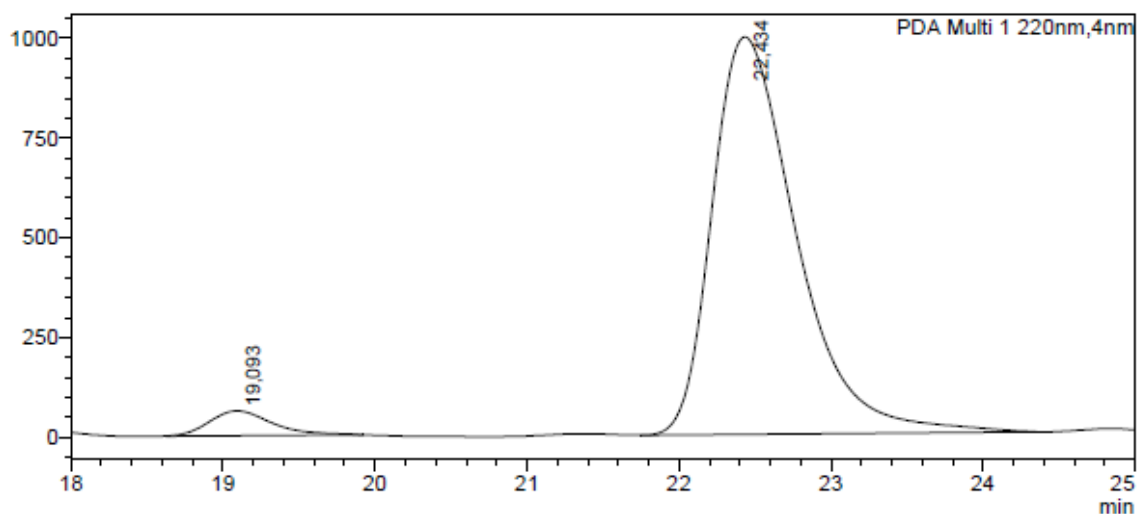

### <Peak Table>

PDA Ch1 220nm

| Peak# | Ret. Time | Area     | Height  | Area%   |
|-------|-----------|----------|---------|---------|
| 1     | 19,093    | 1795013  | 62148   | 4,465   |
| 2     | 22,434    | 38403152 | 996123  | 95,535  |
| Total |           | 40198165 | 1058271 | 100,000 |

### <Chromatogram>

mAU

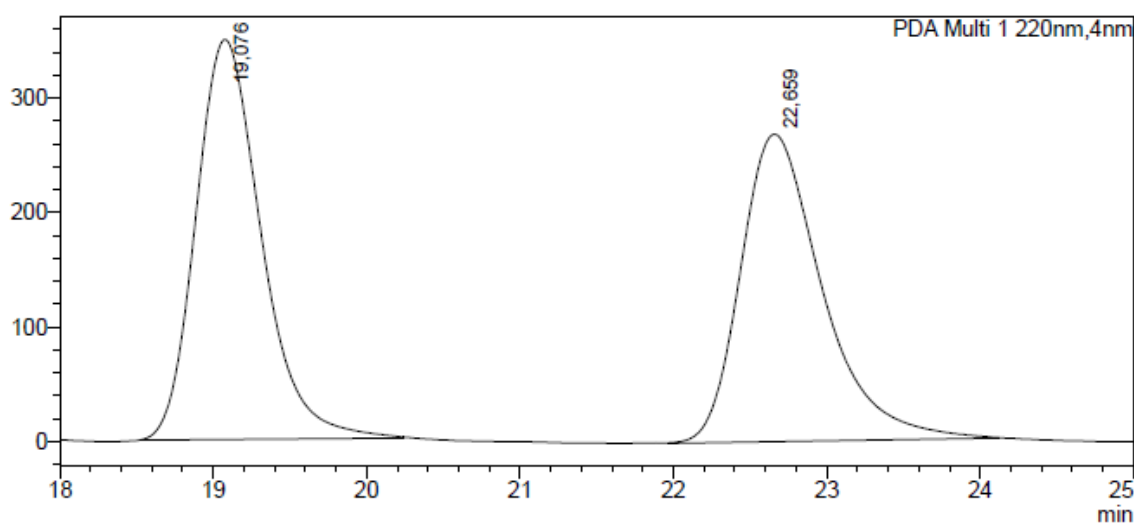

### <Peak Table>

PDA Ch1 220nm

| Peak# | Ret. Time | Area     | Height | Area%   |
|-------|-----------|----------|--------|---------|
| 1     | 19,076    | 10350974 | 349197 | 50,973  |
| 2     | 22,659    | 9955942  | 268544 | 49,027  |
| Total |           | 20306915 | 617740 | 100,000 |

## UV Spectrum

Peak# : 1  
 Retention Time : 19,076 min  
 Compound Name :  
 Spectrum Operation:

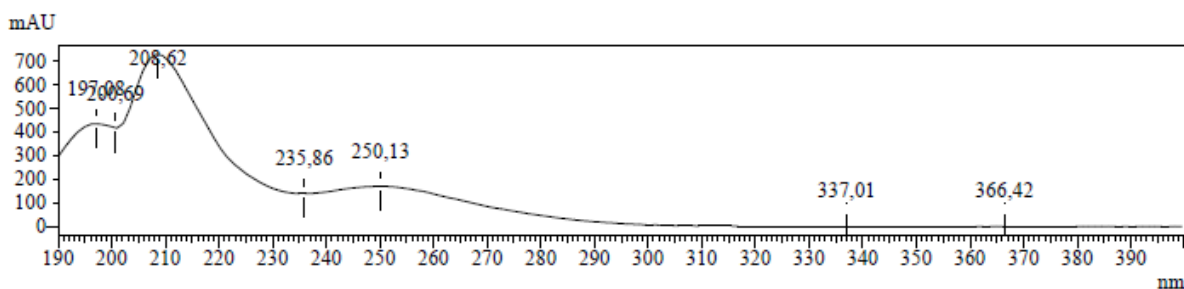

Peak# : 2  
 Retention Time : 22,658 min  
 Compound Name :  
 Spectrum Operation:

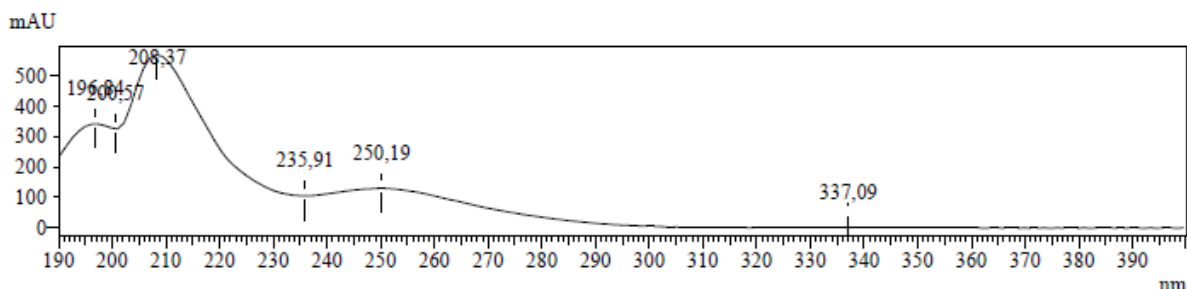

**dimethyl (S)-(2-(diphenylphosphanyl)-1-ferrocenylethyl)phosphonate (4d'a)**

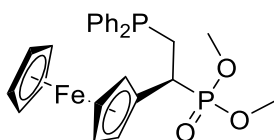

**Following general procedure A:** The reaction was performed with **1 d'** (0.1 mmol, 1 equiv.), manganese catalyst (0.0025 mmol, 2.5 mol%), *t*PentOK (0.005 mmol, 5 mol%), **2a** (0.105 mmol, 1.05 equiv.), toluene (1.0 mL) at 25 °C for 16 h. Product **4d'a** was obtained as an orange solid after column chromatography (SiO<sub>2</sub>, pentane/ethyl acetate = 1:1) [98% yield, 95% ee].

**<sup>1</sup>H NMR (CDCl<sub>3</sub>, 400 MHz):** δ 7.61 – 7.55 (m, 2H, CH<sub>Ar</sub>), 7.52 – 7.46 (m, 2H, CH<sub>Ar</sub>), 7.43 – 7.31 (m, 6H, CH<sub>Ar</sub>), 4.30 – 4.27 (m, 1H, CH<sub>Fe</sub>), 4.24 – 4.20 (m, 1H, CH<sub>Fe</sub>), 4.16 – 4.12 (m, 2H, CH<sub>Fe</sub>), 4.04 – 3.97 (m, 5H, CH<sub>Fe</sub>), 3.56 (d, *J* = 10.7 Hz, 1H, OCH<sub>3</sub>), 3.49 (d, *J* = 10.5 Hz, 1H, OCH<sub>3</sub>), 3.00 – 2.80 (m, 2H, P(O)(OCH<sub>3</sub>)<sub>2</sub>CH, PPh<sub>2</sub>CHCH), 2.70 – 2.55 (m, 1H, PPh<sub>2</sub>CHCH).

**<sup>13</sup>C NMR (CDCl<sub>3</sub>, 101 MHz):** δ 139.7, 139.5, 138.3, 138.1, 133.3, 133.1, 132.9, 129.0, 128.8, 128.8, 128.7, 128.7, 128.6, 86.0, 86.0, 86.0, 86.0, 69.3, 69.3, 69.3, 69.2, 69.0, 69.0, 67.8, 67.7, 67.5, 67.5, 67.5, 67.4, 53.3, 53.2, 53.2, 52.7, 52.7, 52.6, 52.6, 35.8, 35.6, 34.4, 34.2, 29.9, 29.8, 29.7, 29.7. (Due to C–P coupling and the complexity of the spectrum, doublets cannot be assigned and they are listed as singlets)

**<sup>31</sup>P NMR (CDCl<sub>3</sub>, 162 MHz):** δ 26.7 (d, *J* = 15.0 Hz), -19.3 (d, *J* = 15.0 Hz).

**HRMS (ESI, m/z):** calcd. for C<sub>26</sub>H<sub>29</sub>FeO<sub>3</sub>P<sub>2</sub> [M+H]<sup>+</sup>: 507.0936, found: 507.0934.

**HPLC:** Chiracel-ADH, *n*-heptane/*i*-PrOH 80:20, 1.0 mL/min., 40 °C, detection at 207 nm. Retention time (min): 8.6 (minor) and 14.5 (major).

### <Chromatogram>

mAU

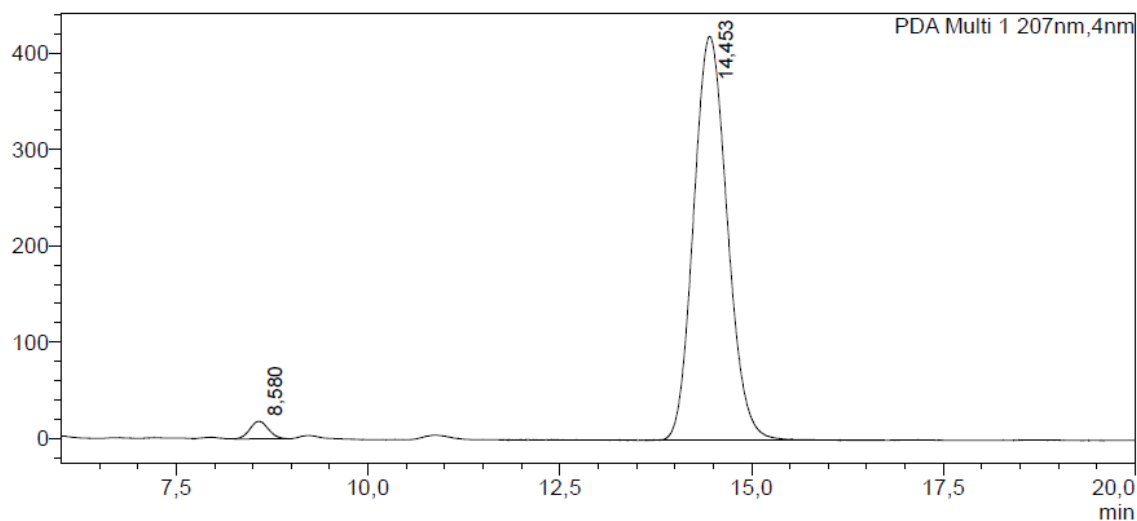

PDA Ch1 207nm

| Peak# | Ret. Time | Area     | Height | Area%   |
|-------|-----------|----------|--------|---------|
| 1     | 8,580     | 304262   | 18190  | 2,317   |
| 2     | 14,453    | 12827681 | 419380 | 97,683  |
| Total |           | 13131943 | 437570 | 100,000 |

### <Chromatogram>

mAU

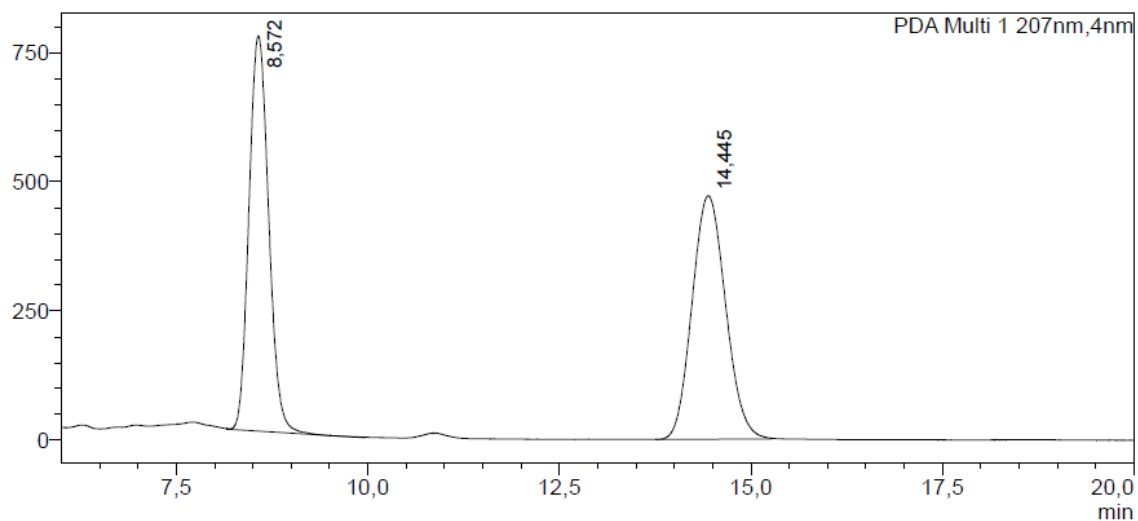

PDA Ch1 207nm

| Peak# | Ret. Time | Area     | Height  | Area%   |
|-------|-----------|----------|---------|---------|
| 1     | 8,572     | 13707933 | 764334  | 48,845  |
| 2     | 14,445    | 14355942 | 471232  | 51,155  |
| Total |           | 28063875 | 1235566 | 100,000 |

UV Spectrum

Peak# : 1  
 Retention Time : 8,572 min  
 Compound Name :  
 Spectrum Operation:

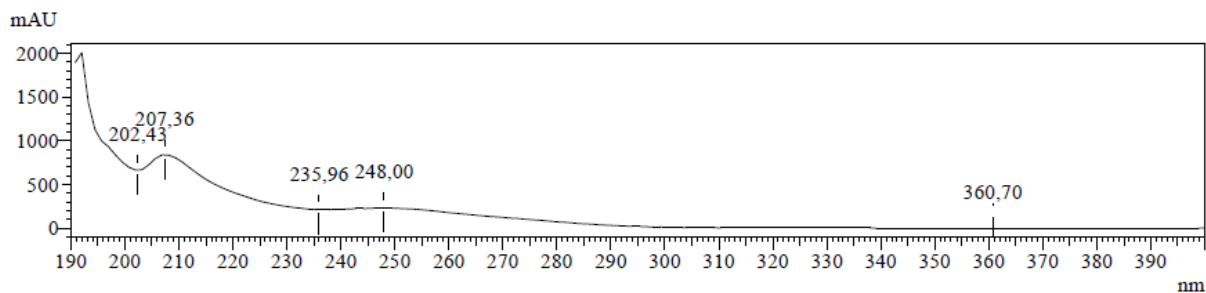

Peak# : 2  
 Retention Time : 14,445 min  
 Compound Name :  
 Spectrum Operation:

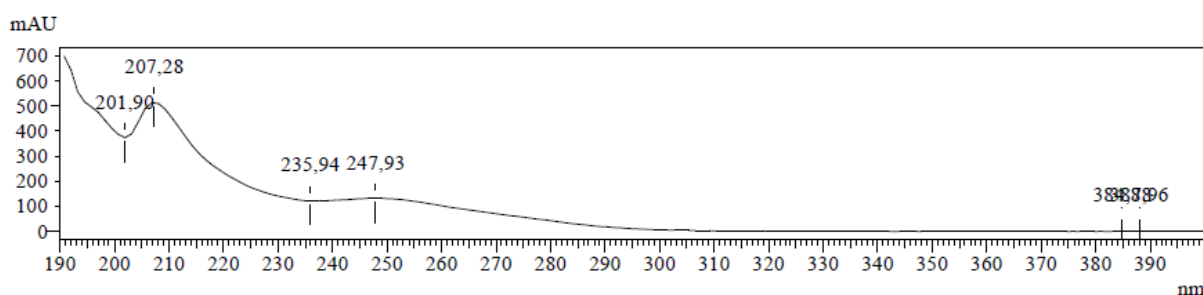

**ethyl ((S)-2-(diphenylphosphaneyl)-1-phenylethyl)(phenyl)phosphinate (4e'a)**

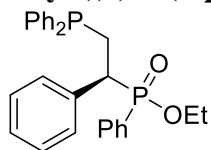

**Following general procedure A:** The reaction was performed with **1 e'** (0.1 mmol, 1 equiv.), manganese catalyst (0.0025 mmol, 2.5 mol%), *t*PentOK (0.005 mmol, 5 mol%), **2a** (0.105 mmol, 1.05 equiv.), toluene (1.0 mL) at 25°C for 16 h. Product **4e'a** was obtained as a white solid after column chromatography (SiO<sub>2</sub>, pentane/ethyl acetate = 1:1) [88% yield, 99% (80%) ee, 1:1 dr].

**<sup>1</sup>H NMR (CDCl<sub>3</sub>, 400 MHz):** δ 7.55 – 7.41 (m, 2H, CH<sub>Ar</sub>), 7.41 – 7.30 (m, 4H, CH<sub>Ar</sub>), 7.30 – 7.14 (m, 11H, CH<sub>Ar</sub>), 7.13 – 7.04 (m, 2H, CH<sub>Ar</sub>), 7.03 – 6.90 (m, 1H, CH<sub>Ar</sub>), 4.20 – 3.67 (m, 2H, CH<sub>3</sub>CH<sub>2</sub>), 3.16 – 2.50 (m, 3H, PPh<sub>2</sub>CH<sub>2</sub>, PhP(O)(OEt)CH), 1.37 – 0.90 (m, 3H, CH<sub>2</sub>CH<sub>3</sub>).

**<sup>13</sup>C NMR (CDCl<sub>3</sub>, 101 MHz):** δ 141.8, 141.7, 139.7, 139.6, 139.2, 139.1, 138.0, 138.0, 137.7, 137.6, 137.6, 136.5, 136.3, 136.3, 136.1, 134.9, 134.9, 134.8, 134.8, 134.8, 134.8, 134.7, 134.7, 134.6, 134.6, 134.4, 133.1, 132.8, 132.6, 132.5, 132.5, 132.4, 132.3, 131.9, 131.8, 131.3, 131.3, 131.2, 131.0, 131.1, 131.0, 130.9, 130.9, 130.9, 130.8, 130.8, 130.8, 130.7, 130.6, 130.0, 130.0, 129.8, 129.7, 129.2, 63.9, 63.8, 63.7, 47.8, 47.6, 47.4, 47.3, 46.8, 46.7, 46.5, 46.4, 30.7, 30.6, 30.3, 30.3, 30.2, 30.1, 19.2, 19.1, 18.9, 18.9. (Due to C–P coupling and the complexity of the spectrum, doublets cannot be assigned and they are listed as singlets)

**<sup>31</sup>P NMR (CDCl<sub>3</sub>, 162 MHz):** δ 39.8 (d, *J* = 37.0 Hz), 38.3 (d, *J* = 37.0 Hz), -23.2 (d, *J* = 37.0 Hz), -23.7 (d, *J* = 37.0 Hz).

**HRMS (ESI, m/z):** calcd. for C<sub>28</sub>H<sub>29</sub>O<sub>2</sub>P<sub>2</sub> [M+H]<sup>+</sup>: 459.1637, found: 459.1638.

**HPLC:** Chiracel-ODH, *n*-heptane/*i*-PrOH 92:8, 1.0 mL/min., 40 °C, detection at 220 nm. Retention time (min): 10.8 (minor), 13.2 (major), 16.2 (minor), 17.1 (major). (Due to the poor separation of the product **4e'a** in the HPLC, the ee of this compound was determined from the corresponding oxidized derivative.)

### <Chromatogram>

mAU

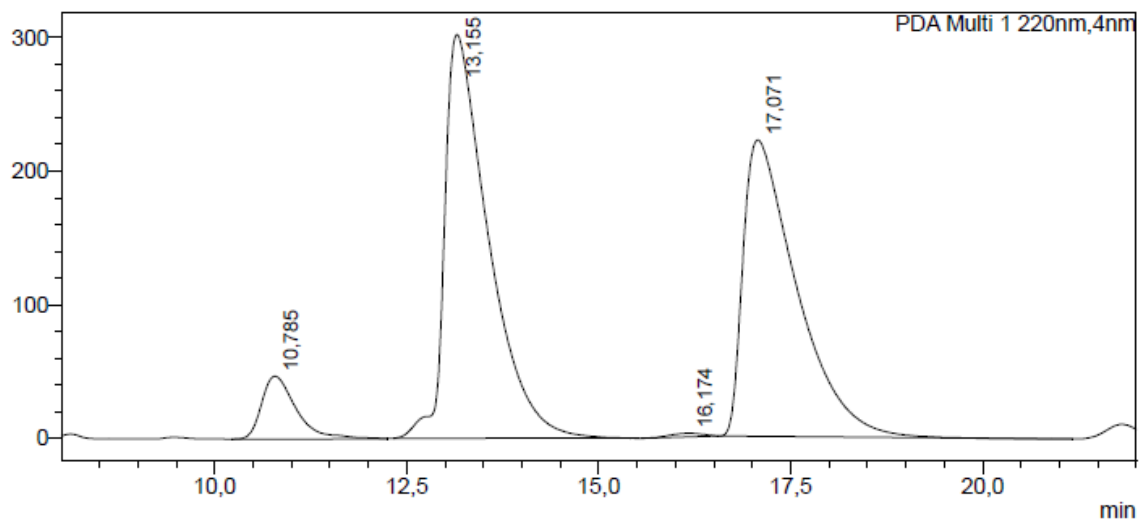

### <Peak Table>

PDA Ch1 220nm

| Peak# | Ret. Time | Area     | Height | Area%   |
|-------|-----------|----------|--------|---------|
| 1     | 10,785    | 1478948  | 47084  | 6,070   |
| 2     | 13,155    | 12011693 | 302002 | 49,298  |
| 3     | 16,174    | 79927    | 2705   | 0,328   |
| 4     | 17,071    | 10794669 | 221661 | 44,304  |
| Total |           | 24365237 | 573452 | 100,000 |

### <Chromatogram>

mAU

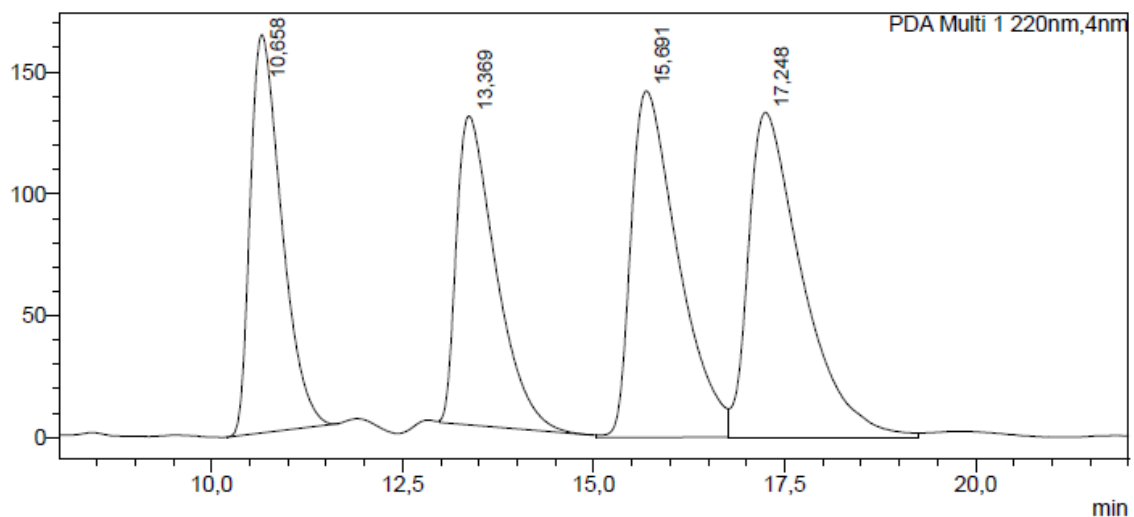

### <Peak Table>

PDA Ch1 220nm

| Peak# | Ret. Time | Area     | Height | Area%   |
|-------|-----------|----------|--------|---------|
| 1     | 10,658    | 4678650  | 163164 | 21,400  |
| 2     | 13,369    | 4543525  | 126607 | 20,782  |
| 3     | 15,691    | 6104986  | 142014 | 27,924  |
| 4     | 17,248    | 6535528  | 133163 | 29,894  |
| Total |           | 21862689 | 564948 | 100,000 |

UV Spectrum

Peak# : 1  
 Retention Time : 10,658 min  
 Compound Name :  
 Spectrum Operation:

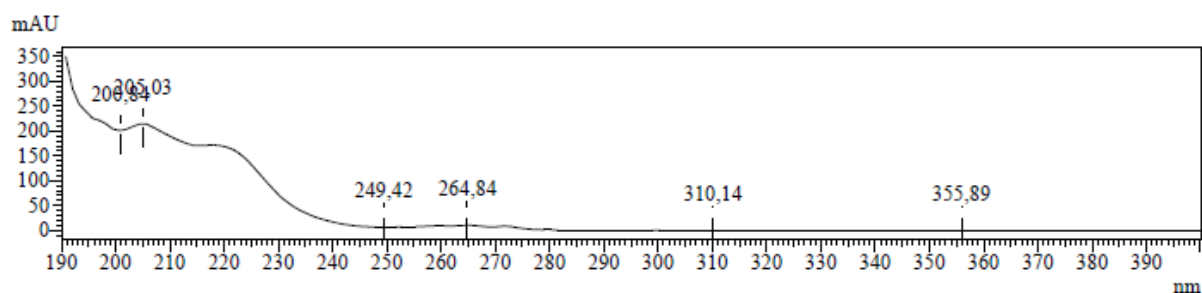

Peak# : 2  
 Retention Time : 13,369 min  
 Compound Name :  
 Spectrum Operation:

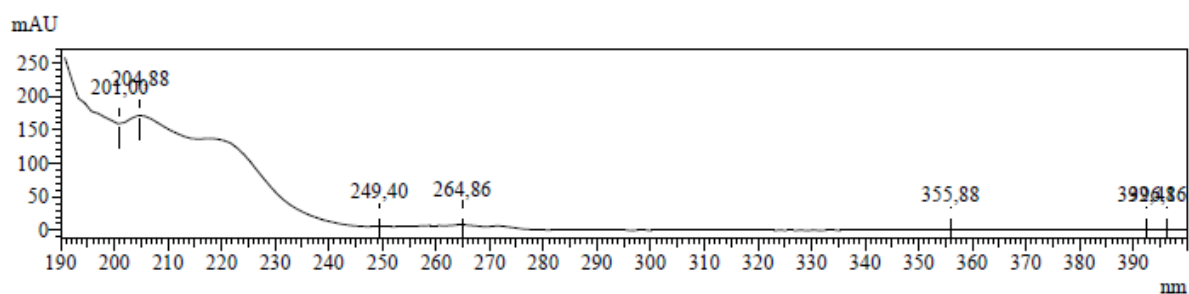

Peak# : 3  
 Retention Time : 15,691 min  
 Compound Name :  
 Spectrum Operation:

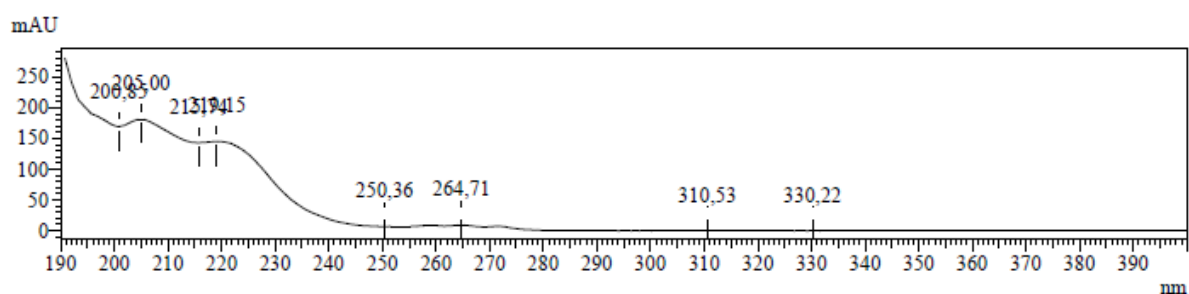

Peak# : 4  
 Retention Time : 17,248 min  
 Compound Name :  
 Spectrum Operation:

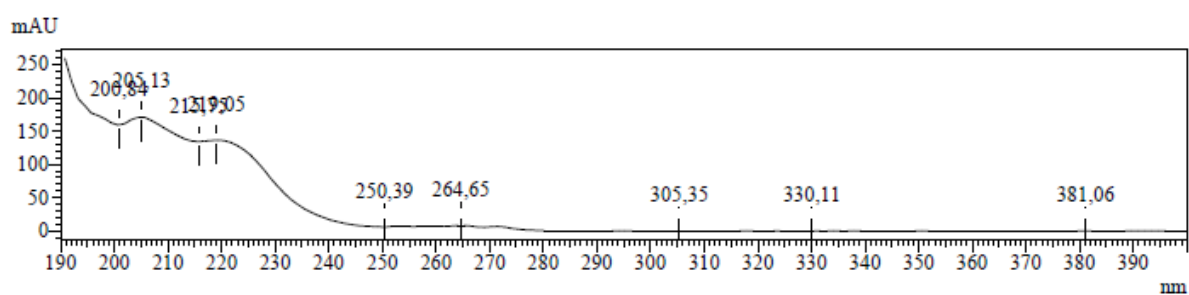

**(S)-(2-(di-p-tolylphosphoryl)-1-phenylethyl)diphenylphosphine oxide (5ab)**

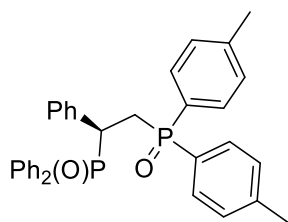

**Following general procedure A:** The reaction was performed with **1a** (0.1 mmol, 1 equiv.), manganese catalyst (0.0025 mmol, 2.5 mol%), *t*PentOK (0.005 mmol, 5 mol%), **2b** (0.105 mmol, 1.05 equiv.), toluene (1.0 mL) at 25°C for 16 h. Then, the reaction mixture was quenched by 30% H<sub>2</sub>O<sub>2</sub> aqueous solution (25 μL) and was stirred for additional 30 minutes at room temperature. After solvent was removed under reduced pressure, the residue was purified by silica gel column chromatography (SiO<sub>2</sub>, pentane/ethyl acetate/methanol = 1:1:0.05) to give product **5ab** as a white solid [82% yield, 96% ee].

**<sup>1</sup>H NMR (CDCl<sub>3</sub>, 400 MHz):** δ 8.10 – 7.96 (m, 2H, CH<sub>Ar</sub>), 7.58 – 7.46 (m, 3H, CH<sub>Ar</sub>), 7.44 – 7.34 (m, 2H, CH<sub>Ar</sub>), 7.33 – 7.19 (m, 3H, CH<sub>Ar</sub>), 7.18 – 7.07 (m, 6H, CH<sub>Ar</sub>), 7.06 – 6.96 (m, 2H, CH<sub>Ar</sub>), 6.89 – 6.73 (m, 5H, CH<sub>Ar</sub>), 4.31 – 4.14 (m, 1H, P(O)Ph<sub>2</sub>CH), 3.14 – 2.96 (m, 1H, P(O)Ph<sub>2</sub>CHCHH), 2.91 – 2.70 (m, 1H, P(O)Ph<sub>2</sub>CHCHH), 2.29 (s, 3H, CH<sub>3</sub>), 2.17 (s, 3H, CH<sub>3</sub>).  
**<sup>13</sup>C NMR (CDCl<sub>3</sub>, 101 MHz):** δ 142.2, 142.2, 141.3, 141.3, 134.5, 134.4, 132.2, 132.1, 132.1, 131.8, 131.7, 131.5, 131.4, 131.3, 131.2, 131.0, 130.9, 130.8, 130.5, 130.4, 130.4, 130.2, 130.2, 129.5, 129.3, 129.2, 129.1, 128.9, 128.8, 128.6, 128.0, 127.9, 127.9, 127.9, 126.7, 126.7, 39.7, 39.7, 39.1, 39.0, 30.7, 30.0, 21.6, 21.4. (Due to C–P coupling and the complexity of the spectrum, doublets cannot be assigned and they are listed as singlets)

**<sup>31</sup>P NMR (CDCl<sub>3</sub>, 162 MHz):** δ 32.1 (d, *J* = 46.7 Hz), 27.1 (d, *J* = 46.7 Hz).

**HRMS (ESI, m/Z):** calcd. for C<sub>34</sub>H<sub>33</sub>O<sub>2</sub>P<sub>2</sub> [M+H]<sup>+</sup>: 535.1950, found: 535.1953.

**HPLC:** Chiracel-ADH, *n*-heptane/*i*-PrOH 70:30, 1.0 mL/min., 40 °C, detection at 224 nm. Retention time (min): 20.0 (minor) and 41.7 (major).

**<Chromatogram>**

mAU

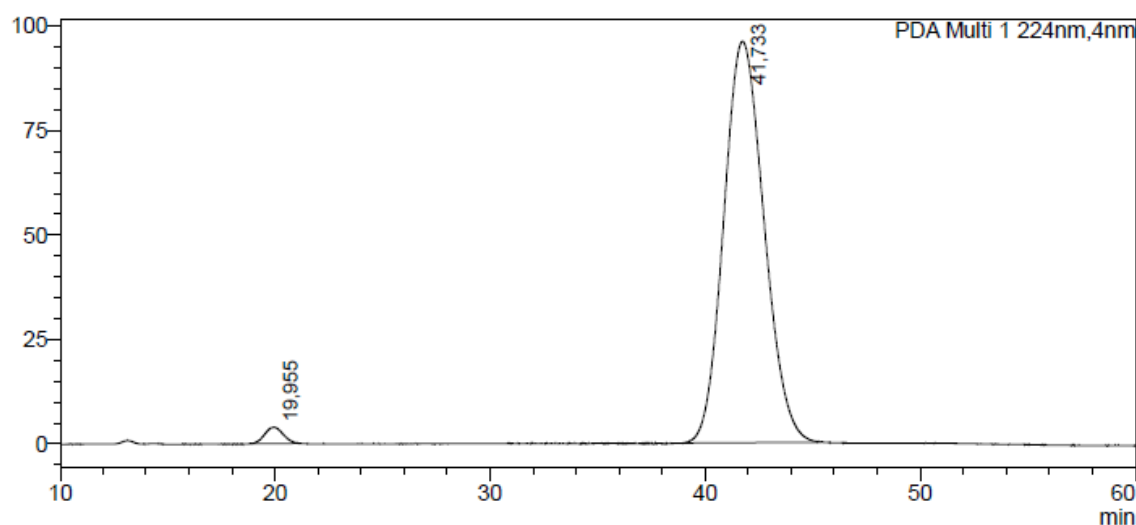

PDA Ch1 224nm

| Peak# | Ret. Time | Area     | Height | Area%   |
|-------|-----------|----------|--------|---------|
| 1     | 19,955    | 233663   | 3939   | 1,832   |
| 2     | 41,733    | 12521067 | 96024  | 98,168  |
| Total |           | 12754730 | 99962  | 100,000 |

<Chromatogram>

mAU

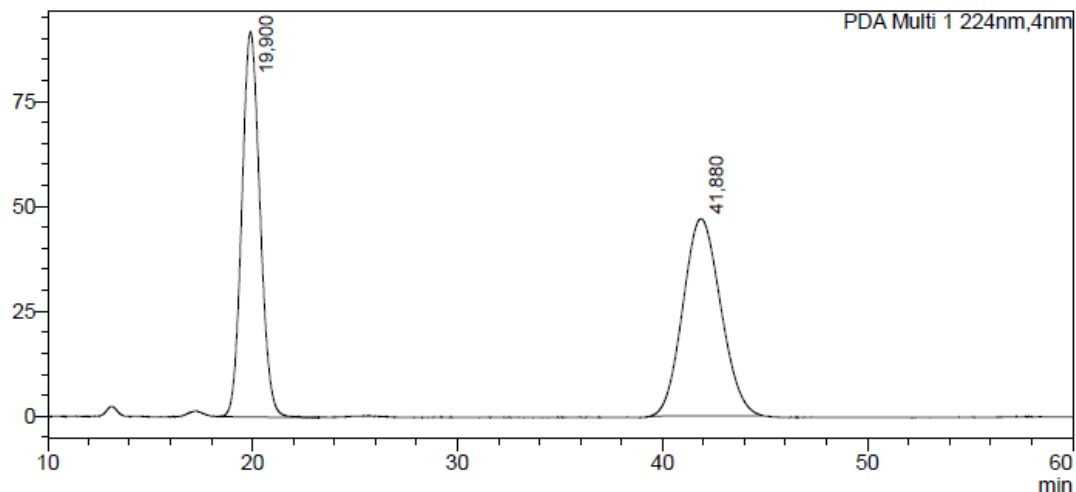

PDA Ch1 224nm

| Peak# | Ret. Time | Area     | Height | Area%   |
|-------|-----------|----------|--------|---------|
| 1     | 19,900    | 5654503  | 91696  | 48,439  |
| 2     | 41,880    | 6019049  | 46969  | 51,561  |
| Total |           | 11673552 | 138665 | 100,000 |

UV Spectrum

Peak# : 1  
 Retention Time : 19,900 min  
 Compound Name :  
 Spectrum Operation:

mAU

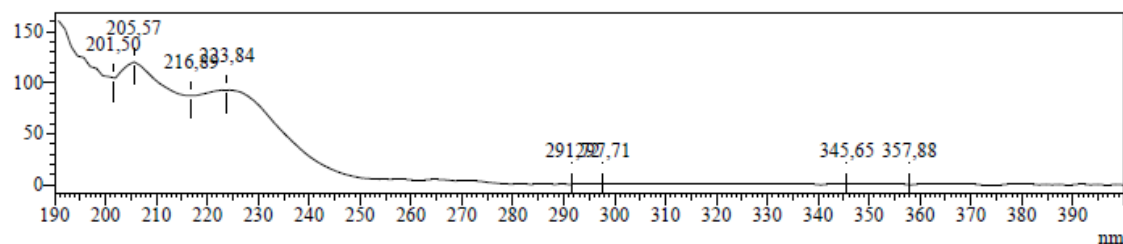

Peak# : 2  
 Retention Time : 41,880 min  
 Compound Name :  
 Spectrum Operation:

mAU

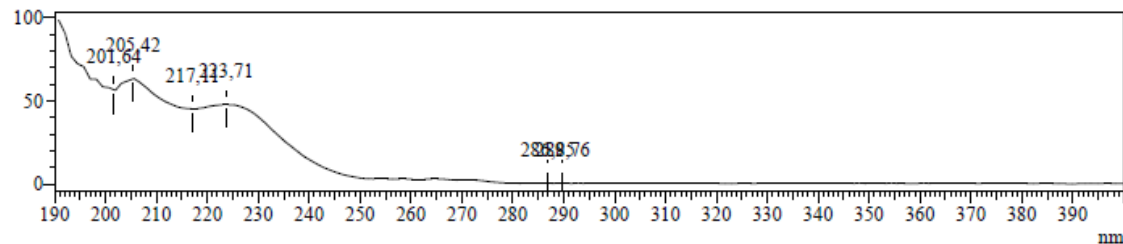



**(S)-2-(bis(4-methoxyphenyl)phosphoryl)-1-phenylethyl)diphenylphosphine oxide (5ac)**

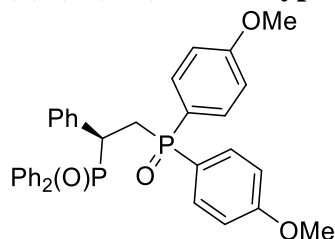

**Following general procedure A:** The reaction was performed with **1a** (0.1 mmol, 1 equiv.), manganese catalyst (0.0025 mmol, 2.5 mol%), *t*PentOK (0.005 mmol, 5 mol%), **2c** (0.105 mmol, 1.05 equiv.), toluene (1.0 mL) at 25 °C for 16 h. Then, the reaction mixture was quenched by 30% H<sub>2</sub>O<sub>2</sub> aqueous solution (25 μL) and was stirred for additional 30 minutes at room temperature. After solvent was removed under reduced pressure, the residue was purified by silica gel column chromatography (SiO<sub>2</sub>, pentane/ethyl acetate/methanol = 1:1:0.05) to give product **5ac** as a white solid [76% yield, 42% ee].

**<sup>1</sup>H NMR (CDCl<sub>3</sub>, 400 MHz):** δ 8.07 – 8.03 (m, 2H), 7.56 (s, 3H), 7.44 – 7.40 (m, 2H), 7.31 – 7.11 (m, 7H), 7.05 – 7.03 (m, 2H), 6.88 – 6.83 (m, 5H), 6.56 – 6.54 (m, 2H), 4.26 – 4.18 (m, 1H), 3.76 (s, 3H), 3.69 (s, 3H), 3.06 – 3.00 (m, 1H), 2.86 – 2.75 (m, 1H).

**<sup>13</sup>C NMR (CDCl<sub>3</sub>, 101 MHz):** δ 162.2, 161.6, 134.5, 134.4, 132.7, 132.6, 132.2, 132.1, 131.7, 131.6, 131.2, 131.1, 130.9, 130.8, 130.4, 130.1, 130.0, 129.1, 129.0, 127.9, 127.8, 126.7, 114.2, 114.1, 113.6, 113.5, 55.3, 55.2, 39.6, 39.0, 30.8, 30.1. (Due to C–P coupling and the complexity of the spectrum, doublets cannot be assigned and they are listed as singlets)

**<sup>31</sup>P NMR (CDCl<sub>3</sub>, 162 MHz):** δ 35.3 (d, *J* = 46.5 Hz), 30.1 (d, *J* = 46.5 Hz).

**HRMS (ESI, *m/z*):** calcd. for C<sub>34</sub>H<sub>33</sub>O<sub>4</sub>P<sub>2</sub> [M+H]<sup>+</sup>: 567.1849, found: 567.1853.

**HPLC:** Chiracel-ADH, *n*-heptane/*i*-PrOH 70:30, 1.0 mL/min., 40 °C, detection at 206 nm. Retention time (min): 32.1 (minor) and 76.8 (major).

**<Chromatogram>**

mAU

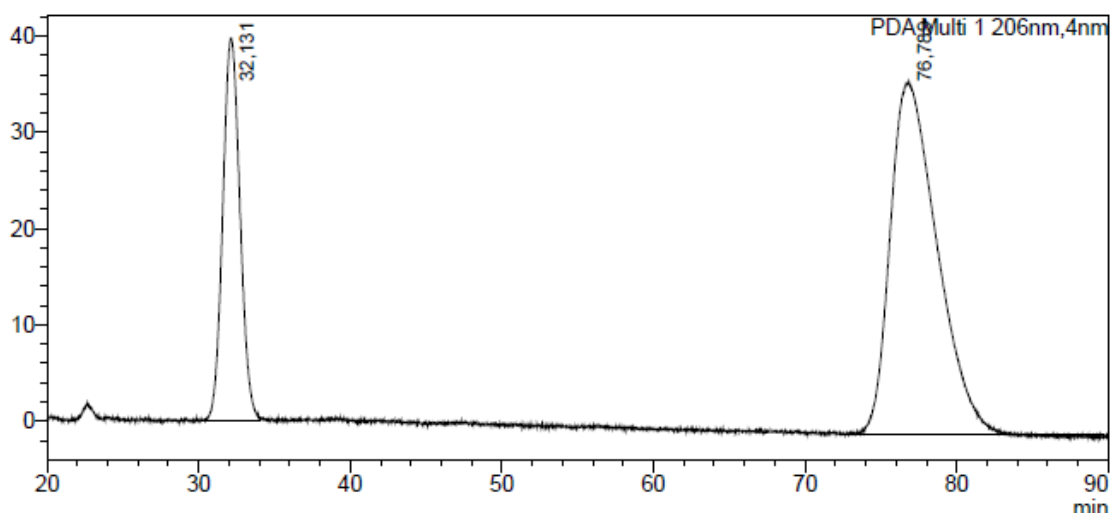

**<Peak Table>**

| PDA Ch1 206nm |           |          |        |         |
|---------------|-----------|----------|--------|---------|
| Peak#         | Ret. Time | Area     | Height | Area%   |
| 1             | 32.131    | 3159840  | 39779  | 28.908  |
| 2             | 76.789    | 7770940  | 36521  | 71.092  |
| Total         |           | 10930780 | 76300  | 100.000 |

### <Chromatogram>

mAU

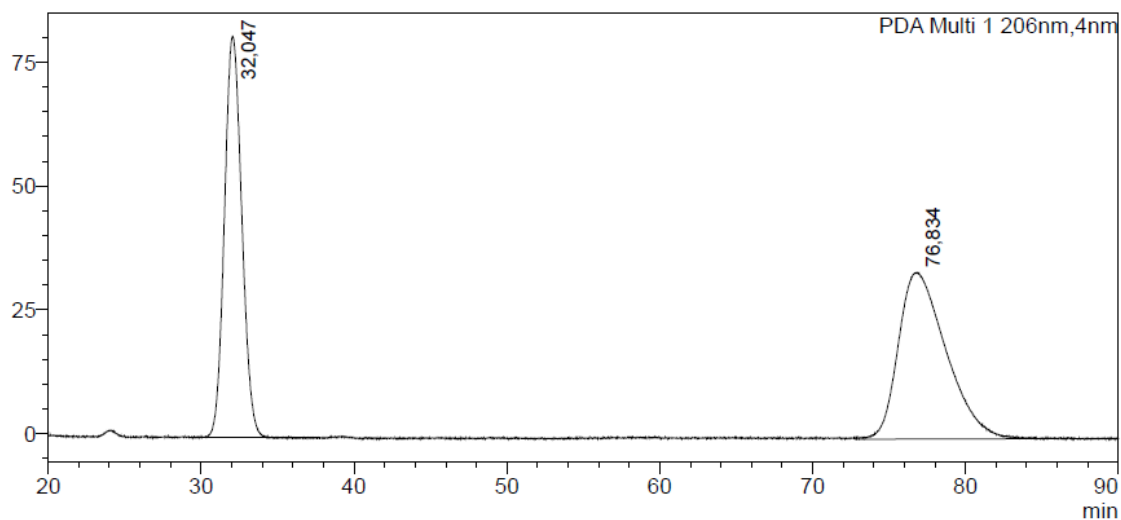

### <Peak Table>

PDA Ch1 206nm

| Peak# | Ret. Time | Area     | Height | Area%   |
|-------|-----------|----------|--------|---------|
| 1     | 32,047    | 6374204  | 81006  | 46,574  |
| 2     | 76,834    | 7312090  | 33610  | 53,426  |
| Total |           | 13686294 | 114616 | 100,000 |

### UV Spectrum

Peak# : 1  
Retention Time : 32,131 min  
Compound Name :  
Spectrum Operation:

mAU

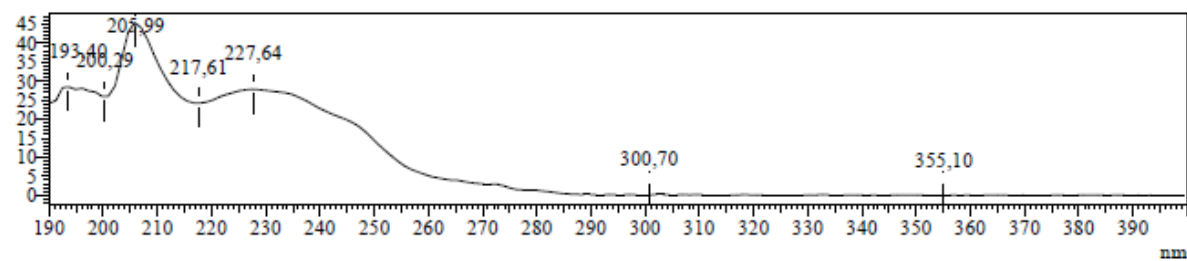

Peak# : 2  
Retention Time : 76,789 min  
Compound Name :  
Spectrum Operation:

mAU

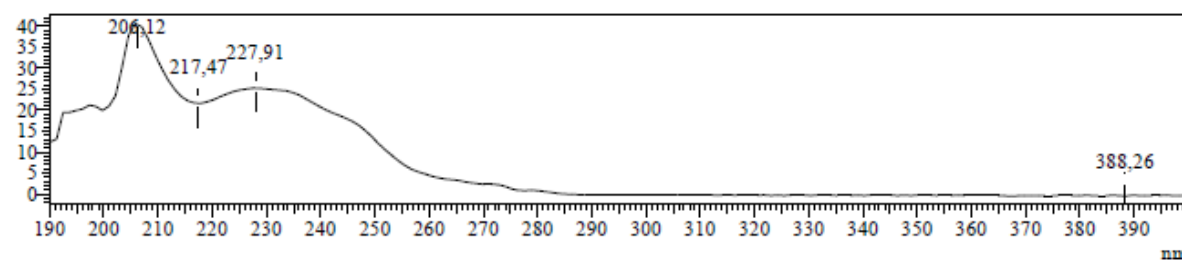

**(2-(mesityl(phenyl)phosphaneyl)ethyl)diphenylphosphine oxide (5a'h)**

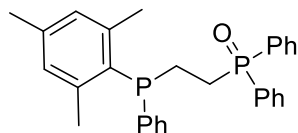

**Following general procedure A:** The reaction was performed with **1'b** (0.1 mmol, 1 equiv.), manganese catalyst (0.005 mmol, 5 mol%), *t*PentOK (0.01 mmol, 10 mol%), **2h** (0.105 mmol, 1.05 equiv.), toluene (1.0 mL) at 25°C for 72 h. Product **5b'h** was obtained as a white solid after column chromatography (SiO<sub>2</sub>, pentane/ethyl acetate/methanol = 1:1:0.05) [86% yield, 0% ee].

**<sup>1</sup>H NMR (CDCl<sub>3</sub>, 400 MHz):** δ 7.73 – 7.60 (m, 4H), 7.53 – 7.39 (m, 6H), 7.22 – 7.11 (m, 5H), 6.85 (s, 2H), 2.55 – 2.36 (m, 3H), 2.28 (s, 3H), 2.21 (s, 6H), 2.15 – 2.03 (m, 1H).

**<sup>13</sup>C NMR (CDCl<sub>3</sub>, 101 MHz):** δ 145.8, 145.6, 140.7, 140.6, 140.5, 140.5, 140.1, 140.1, 133.6, 132.8, 132.6, 132.0, 131.9, 131.9, 131.9, 131.1, 131.0, 131.0, 130.9, 130.1, 130.0, 129.4, 129.2, 128.9, 128.8, 128.8, 128.7, 128.5, 128.5, 128.2, 128.0, 126.8, 126.8, 27.1, 26.9, 26.4, 26.2, 25.7, 23.4, 23.3, 21.2, 16.9, 16.9, 16.7, 16.7. (Due to C–P coupling and the complexity of the spectrum, doublets cannot be assigned and they are listed as singlets)

**<sup>31</sup>P NMR (CDCl<sub>3</sub>, 162 MHz):** δ 29.6 (d, *J* = 55.3 Hz), -25.0 (d, *J* = 55.3 Hz).

**HRMS (ESI, m/z):** calcd. for C<sub>29</sub>H<sub>31</sub>OP<sub>2</sub> [M+H]<sup>+</sup>: 457.1845, found: 457.1851.

**HPLC:** Chiracel-ASH, *n*-heptane/*i*-PrOH 90:10, 0.5 mL/min., 40 °C, detection at 209 nm. Retention time (min): 12.2 and 13.6.

**<Chromatogram>**

mAU

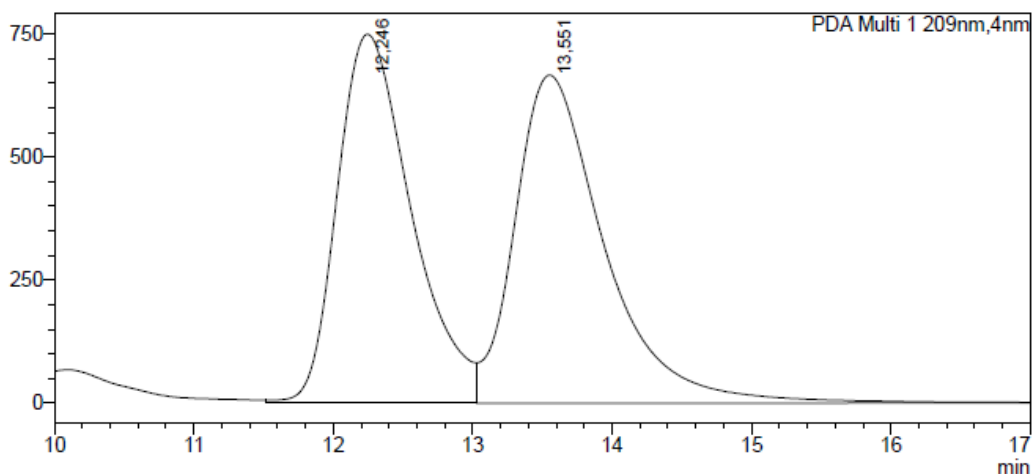

**<Peak Table>**

PDA Ch1 209nm

| Peak# | Ret. Time | Area     | Height  | Area%   |
|-------|-----------|----------|---------|---------|
| 1     | 12,246    | 27731692 | 749362  | 48,004  |
| 2     | 13,551    | 30037348 | 666168  | 51,996  |
| Total |           | 57769040 | 1415531 | 100,000 |

### <Chromatogram>

mAU

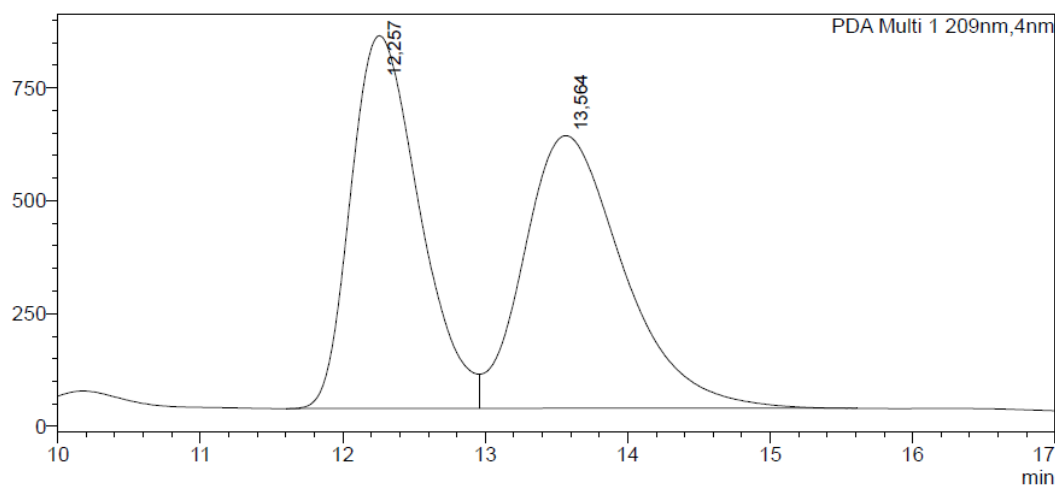

### <Peak Table>

PDA Ch1 209nm

| Peak# | Ret. Time | Area     | Height  | Area%   |
|-------|-----------|----------|---------|---------|
| 1     | 12,257    | 27682684 | 825392  | 48,567  |
| 2     | 13,564    | 29316155 | 604058  | 51,433  |
| Total |           | 56998839 | 1429450 | 100,000 |

### UV Spectrum

Peak# : 1  
Retention Time : 12,257 min  
Compound Name :  
Spectrum Operation:

mAU

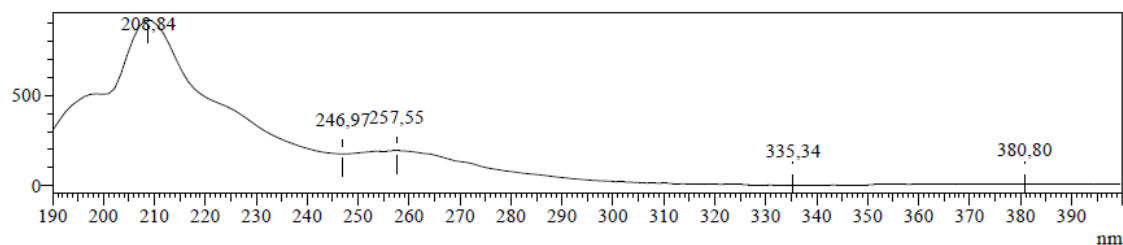

Peak# : 2  
Retention Time : 13,564 min  
Compound Name :  
Spectrum Operation:

mAU

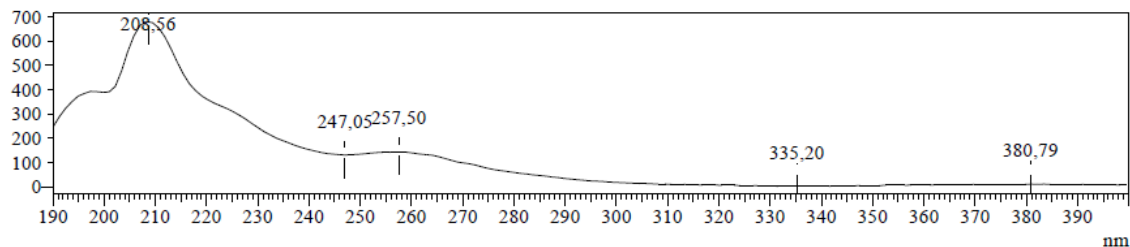

**(S)-(1-phenylethane-1,2-diyl)bis(diphenylphosphane) borane complex (6aa)<sup>1</sup>**

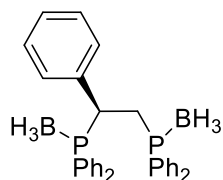

**Following general procedure B:** The reaction was performed with **1a** (0.1 mmol, 1 equiv.), manganese catalyst (0.0025 mmol, 2.5 mol%), *t*PentOK (0.005 mmol, 5 mol%), **2a** (0.105 mmol, 1.05 equiv.), toluene (1.0 mL) at 25°C for 16 h, then Ti(*Oi*Pr)<sub>4</sub> (0.03 mmol, 0.3 equiv), HSi(OEt)<sub>3</sub> (0.3 mmol, 3.0 equiv) at 120°C for 1h; finally, BH<sub>3</sub>·THF (0.3 mmol, 3.0 equiv) at rt for 1h. Product **6aa** was obtained as a white solid after column chromatography (SiO<sub>2</sub>, pentane/dichloromethane = 2:1) [86% yield, 96% ee].

**<sup>1</sup>H NMR (CDCl<sub>3</sub>, 400 MHz):** δ 8.22 – 8.07 (m, 2H, CH<sub>Ar</sub>), 7.65 – 7.57 (m, 3H, CH<sub>Ar</sub>), 7.56 – 7.49 (m, 2H, CH<sub>Ar</sub>), 7.48 – 7.43 (m, 1H, CH<sub>Ar</sub>), 7.43 – 7.36 (m, 2H, CH<sub>Ar</sub>), 7.34 – 7.26 (m, 3H, CH<sub>Ar</sub>), 7.25 – 7.12 (m, 5H, CH<sub>Ar</sub>), 7.09 – 7.01 (m, 2H, CH<sub>Ar</sub>), 6.97 – 6.90 (m, 2H, CH<sub>Ar</sub>), 6.89 – 6.82 (m, 1H, CH<sub>Ar</sub>), 6.81 – 6.74 (m, 2H, CH<sub>Ar</sub>), 4.61 – 4.49 (m, 1H, CH), 3.4 – 3.28 (m, 1H, CHH), 2.61 – 2.48 (m, 1H, CHH), 1.55 – 0.53 (m, 6H, 2xBH<sub>3</sub>) ppm.

**<sup>13</sup>C NMR (CDCl<sub>3</sub>, 101 MHz):** δ 133.8, 133.4, 133.0, 132.9, 132.8, 132.5, 132.2, 131.8, 131.5, 131.3, 131.1, 131.0, 130.7, 130.4, 130.0, 129.8, 129.6, 129.6, 129.2, 129.1, 129.0, 128.8, 128.7, 128.4, 128.1, 128.0, 127.6, 127.5, 127.3, 127.0, 126.9, 126.7, 126.6, 37.9, 37.6, 27.1, 26.8. (Due to C–P coupling and the complexity of the spectrum, doublets cannot be assigned and they are listed as singlets)

**<sup>31</sup>P NMR (CDCl<sub>3</sub>, 162 MHz):** δ 23.8, 13.8.

**HPLC:** Chiracel-ADH, *n*-heptane/*i*-PrOH 90:10, 0.5 mL/min., 40 °C, detection at 207 nm. Retention time (min): 12.7 (minor) and 15.8 (major).

#### <Chromatogram>

mAU

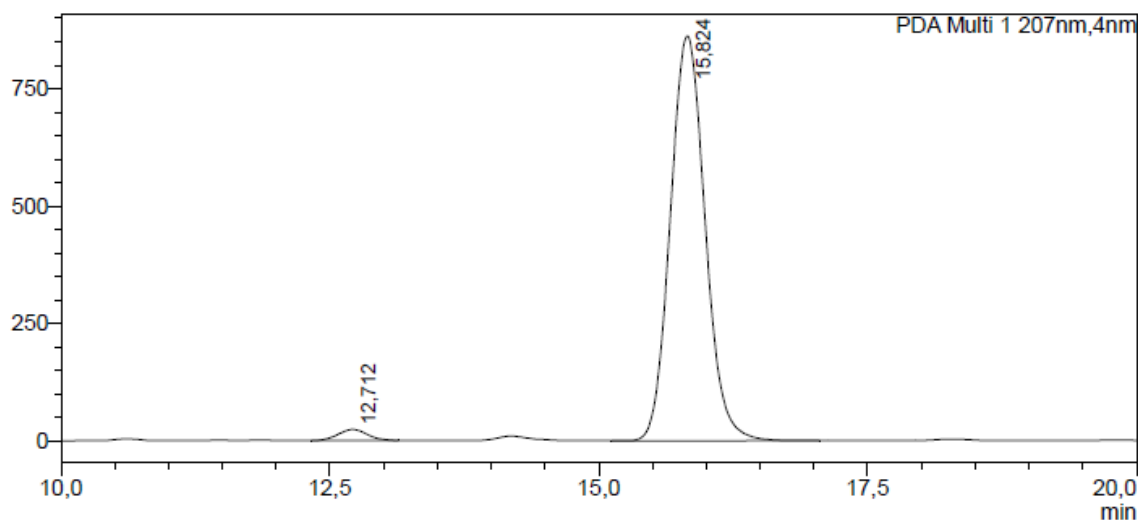

#### <Peak Table>

PDA Ch1 207nm

| Peak# | Ret. Time | Area     | Height | Area%   |
|-------|-----------|----------|--------|---------|
| 1     | 12,712    | 438201   | 23439  | 2,208   |
| 2     | 15,824    | 19403996 | 861747 | 97,792  |
| Total |           | 19842197 | 885186 | 100,000 |

### <Chromatogram>

mAU

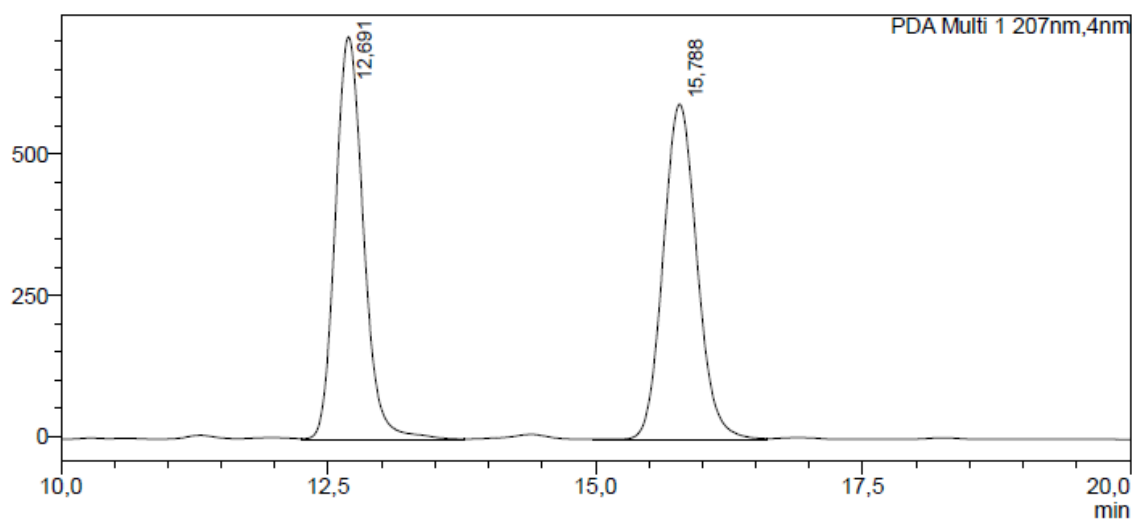

### <Peak Table>

PDA Ch1 207nm

| Peak# | Ret. Time | Area     | Height  | Area%   |
|-------|-----------|----------|---------|---------|
| 1     | 12,691    | 13106260 | 711796  | 50,020  |
| 2     | 15,788    | 13095910 | 593075  | 49,980  |
| Total |           | 26202171 | 1304871 | 100,000 |

UV Spectrum

Peak# : 1  
Retention Time : 12,691 min  
Compound Name :  
Spectrum Operation:

mAU

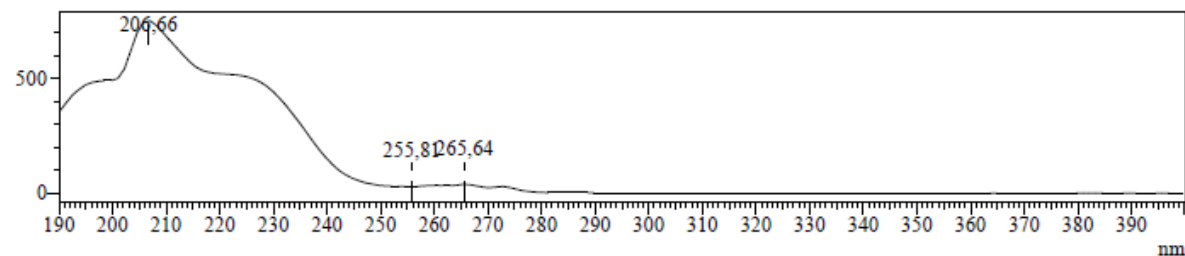

Peak# : 2  
Retention Time : 15,788 min  
Compound Name :  
Spectrum Operation:

mAU

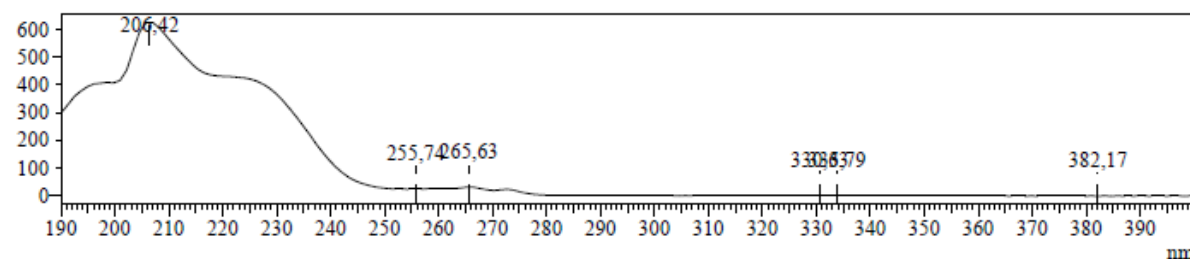

**(S)-(1-(4-methoxyphenyl)ethane-1,2-diyl)bis(diphenylphosphane) borane complex (6ba)**

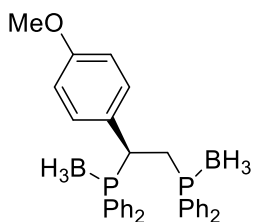

**Following general procedure B:** The reaction was performed with **1b** (0.1 mmol, 1 equiv.), manganese catalyst (0.0025 mmol, 2.5 mol%), *t*PentOK (0.005 mmol, 5 mol%), **2a** (0.105 mmol, 1.05 equiv.), toluene (1.0 mL) at 25°C for 16 h, then Ti(*Oi*Pr)<sub>4</sub> (0.03 mmol, 0.3 equiv.), HSi(OEt)<sub>3</sub> (0.3 mmol, 3.0 equiv) at 120°C for 1h; finally, BH<sub>3</sub>·THF (0.3 mmol, 3.0 equiv) at rt for 1h. Product **6ba** was obtained as a white solid after column chromatography (SiO<sub>2</sub>, pentane/dichloromethane = 2:1) [80% yield, 97% ee].

**<sup>1</sup>H NMR (CDCl<sub>3</sub>, 400 MHz):** δ 8.15 – 8.05 (m, 2H, CH<sub>Ar</sub>), 7.64 – 7.56 (m, 3H, CH<sub>Ar</sub>), 7.54 – 7.48 (m, 2H, CH<sub>Ar</sub>), 7.48 – 7.42 (m, 1H, CH<sub>Ar</sub>), 7.42 – 7.36 (m, 2H, CH<sub>Ar</sub>), 7.33 – 7.14 (m, 8H), 7.12 – 7.04 (m, 2H), 6.84 (d, *J* = 7.5 Hz, 2H, CH<sub>Ar</sub>), 6.30 (d, *J* = 8.3 Hz, 2H, CH<sub>Ar</sub>), 4.61 – 4.42 (m, 1H, CH), 3.65 (s, 3H, OCH<sub>3</sub>), 3.35 – 3.20 (m, 1H, CHH), 2.58 – 2.43 (m, 1H, CHH), 1.47 – 0.56 (m, 6H, 2xBH<sub>3</sub>).

**<sup>13</sup>C NMR (CDCl<sub>3</sub>, 101 MHz):** δ 158.6, 158.6, 133.3, 133.2, 132.7, 132.7, 132.6, 132.5, 131.8, 131.8, 131.5, 131.5, 131.5, 131.4, 131.1, 131.1, 131.0, 131.0, 130.6, 130.6, 130.4, 130.0, 129.3, 129.23, 128.9, 128.8, 128.2, 128.1, 128.0, 128.0, 127.8, 127.7, 127.0, 126.7, 124.6, 113.0, 112.9, 55.1, 37.0, 36.9, 36.7, 36.7, 27.4, 27.4, 27.2, 27.1. (Due to C–P coupling and the complexity of the spectrum, doublets cannot be assigned and they are listed as singlets)

**<sup>31</sup>P NMR (CDCl<sub>3</sub>, 162 MHz):** δ 25.8, 16.7.

**HRMS (ESI, *m/z*):** calcd. for C<sub>33</sub>H<sub>36</sub>OP<sub>2</sub>Na [M+Na]<sup>+</sup>: 555.2320, found: 555.2319.

**HPLC:** Chiracel-ADH, *n*-heptane/*i*-PrOH 90:10, 0.5 mL/min., 40 °C, detection at 206 nm. Retention time (min): 15.9 (minor) and 23.8 (major).

#### <Chromatogram>

mAU

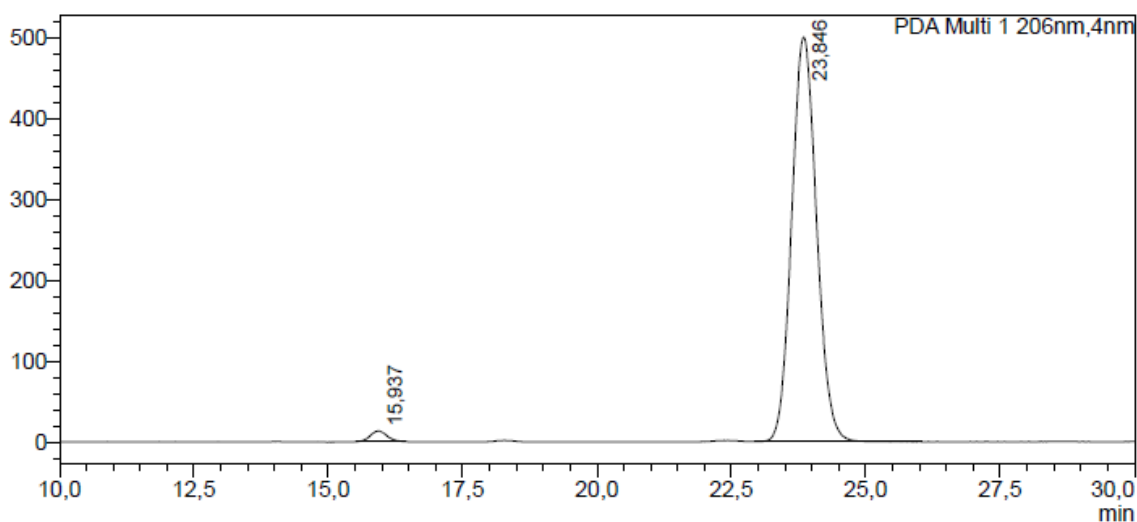

#### <Peak Table>

PDA Ch1 206nm

| Peak# | Ret. Time | Area     | Height | Area%   |
|-------|-----------|----------|--------|---------|
| 1     | 15,937    | 279342   | 12995  | 1,704   |
| 2     | 23,846    | 16111266 | 499695 | 98,296  |
| Total |           | 16390609 | 512690 | 100,000 |

### <Chromatogram>

mAU

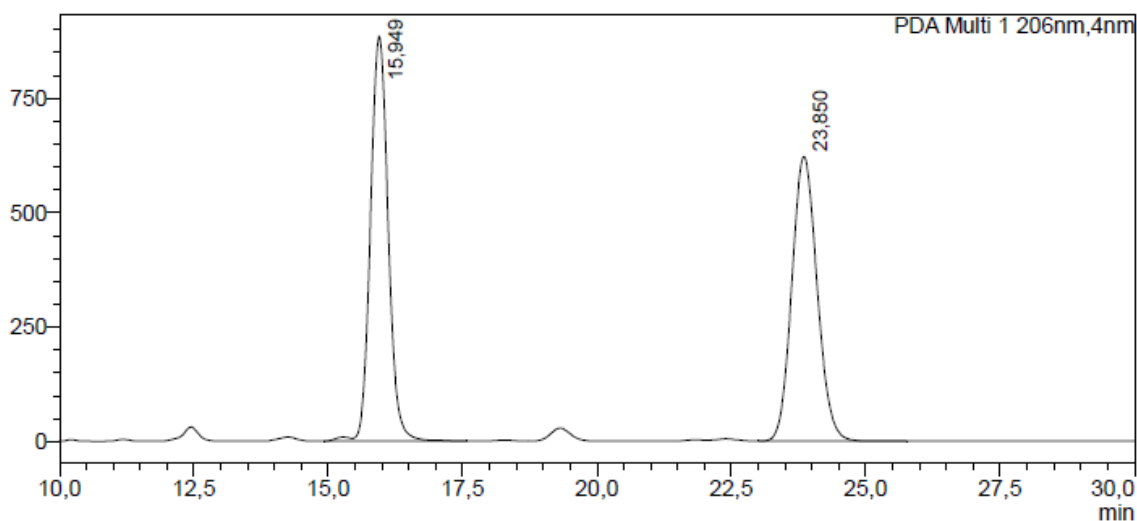

### <Peak Table>

PDA Ch1 206nm

| Peak# | Ret. Time | Area     | Height  | Area%   |
|-------|-----------|----------|---------|---------|
| 1     | 15,949    | 20377422 | 884022  | 50,037  |
| 2     | 23,850    | 20347611 | 621388  | 49,963  |
| Total |           | 40725032 | 1505411 | 100,000 |

UV Spectrum

Peak# : 1  
 Retention Time : 15,949 min  
 Compound Name :  
 Spectrum Operation:

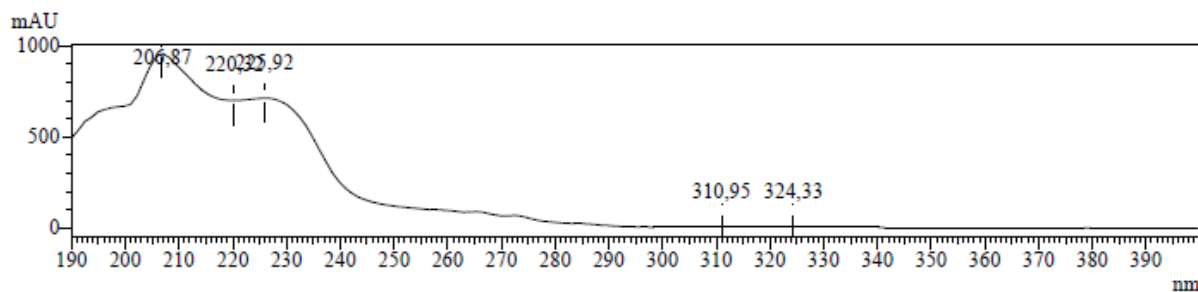

Peak# : 2  
 Retention Time : 23,850 min  
 Compound Name :  
 Spectrum Operation:

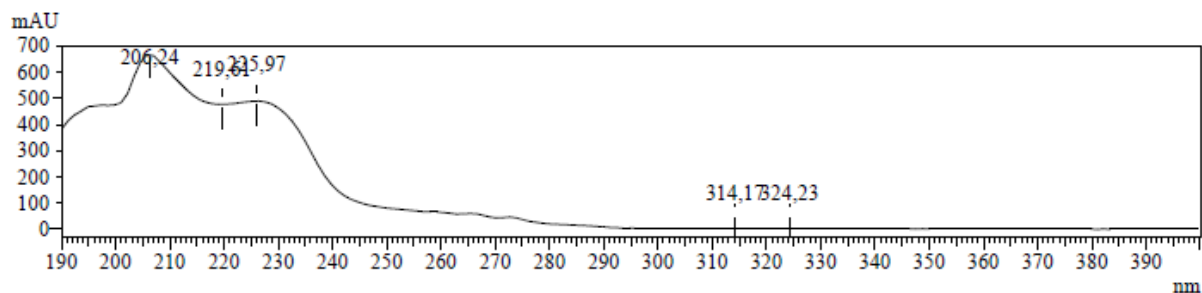



**(S)-(1-ferrocenylethane-1,2-diyl)bis(diphenylphosphane) borane complex (6ca)**

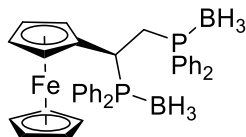

**Following general procedure B:** The reaction was performed with **1p** (0.1 mmol, 1 equiv.), manganese catalyst (0.0025 mmol, 2.5 mol%), *t*PentOK (0.005 mmol, 5 mol%), **2a** (0.105 mmol, 1.05 equiv.), toluene (1.0 mL) at 25°C for 16 h, then Ti(*Oi*Pr)<sub>4</sub> (0.03 mmol, 0.3 equiv), HSi(OEt)<sub>3</sub> (0.3 mmol, 3.0 equiv) at 120°C for 1h; finally, BH<sub>3</sub>·THF (0.3 mmol, 3.0 equiv) at rt for 1h. Product **6ca** was obtained as an orange solid after column chromatography (SiO<sub>2</sub>, pentane/dichloromethane = 2:1) [81% yield, 98% ee].

**<sup>1</sup>H NMR (CDCl<sub>3</sub>, 400 MHz):** δ 7.91 – 7.78 (m, 2H, CH<sub>Ar</sub>), 7.73 – 7.62 (m, 2H, CH<sub>Ar</sub>), 7.58 – 7.05 (m, 16H, CH<sub>Ar</sub>), 4.43 – 4.30 (m, 1H, CH), 4.20 (s, br, 1H, CH<sub>Fe</sub>), 3.94 (s, br, 6H, CH<sub>Fe</sub>), 3.76 (s, br, 1H, CH<sub>Fe</sub>), 3.59 (s, br, 1H, CH<sub>Fe</sub>), 3.44 – 3.29 (m, 1H, CHH), 3.27 – 3.10 (m, 1H, CHH), 1.70 – 0.54 (m, 6H, 2xBH<sub>3</sub>).

**<sup>13</sup>C NMR (CDCl<sub>3</sub>, 101 MHz):** δ 133.5, 133.5, 133.0, 133.0, 132.9, 132.8, 132.0, 131.9, 131.8, 131.7, 131.7, 131.4, 131.4, 131.1, 131.1, 131.0, 130.9, 130.9, 130.7, 130.7, 130.6, 129.3, 129.2, 129.1, 128.9, 128.8, 128.8, 128.6, 128.6, 128.5, 128.4, 128.2, 128.2, 127.3, 127.0, 89.1, 89.1, 89.1, 89.1, 69.6, 68.8, 68.6, 68.6, 67.3, 67.0, 31.2, 31.2, 31.0, 30.9, 29.9, 29.9, 29.7, 29.6. (Due to C–P coupling and the complexity of the spectrum, doublets cannot be assigned and they are listed as singlets)

**<sup>31</sup>P NMR (CDCl<sub>3</sub>, 162 MHz):** δ 25.0, 16.2.

**HRMS (ESI, m/Z):** calcd. for C<sub>36</sub>H<sub>38</sub>B<sub>2</sub>P<sub>2</sub>Na [M+Na]<sup>+</sup>: 633.1876, found: 633.1867.

**HPLC:** Chiracel-ADH, *n*-heptane/*i*-PrOH 90:10, 0.5 mL/min., 40 °C, detection at 208 nm. Retention time (min): 19.2 (major) and 21.1 (minor).

**<Chromatogram>**

mAU

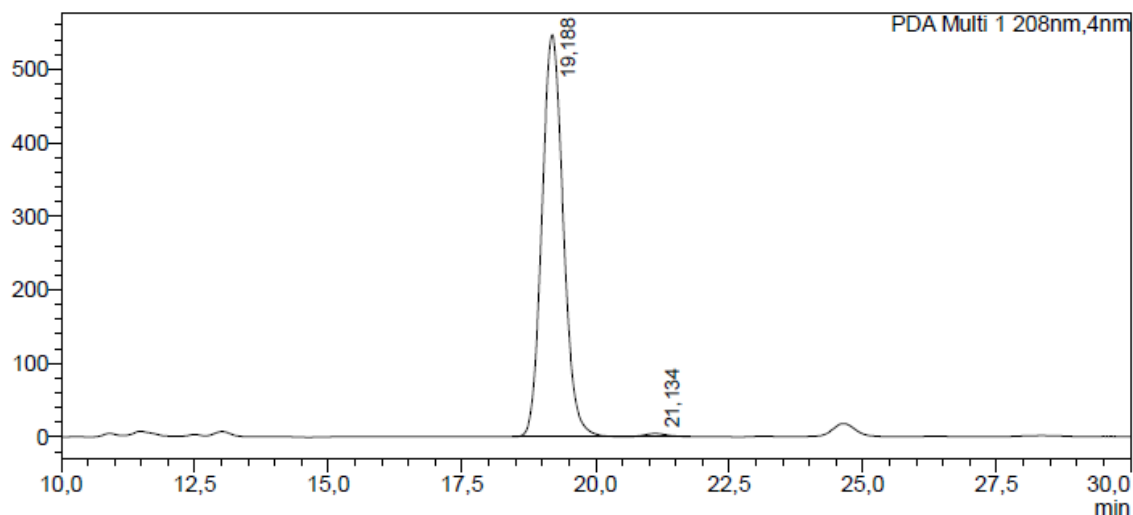

**<Peak Table>**

PDA Ch1 208nm

| Peak# | Ret. Time | Area     | Height | Area%   |
|-------|-----------|----------|--------|---------|
| 1     | 19,188    | 15165953 | 546257 | 99,262  |
| 2     | 21,134    | 112803   | 4023   | 0,738   |
| Total |           | 15278756 | 550280 | 100,000 |

### <Chromatogram>

mAU

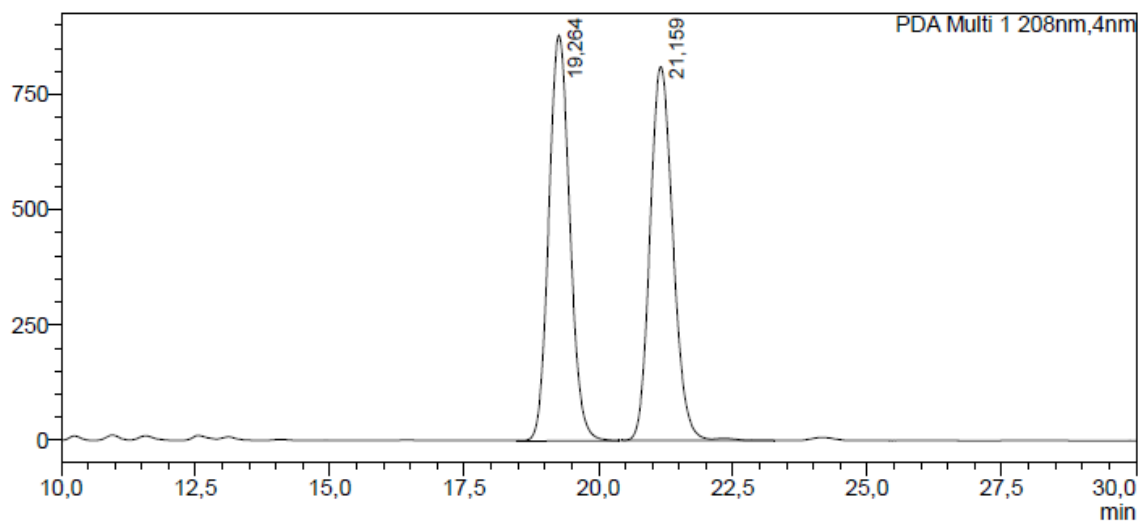

### <Peak Table>

PDA Ch1 208nm

| Peak# | Ret. Time | Area     | Height  | Area%   |
|-------|-----------|----------|---------|---------|
| 1     | 19,264    | 23970477 | 879790  | 49,848  |
| 2     | 21,159    | 24117061 | 810542  | 50,152  |
| Total |           | 48087538 | 1690332 | 100,000 |

### UV Spectrum

Peak# : 1  
Retention Time : 19,264 min  
Compound Name :  
Spectrum Operation:

mAU

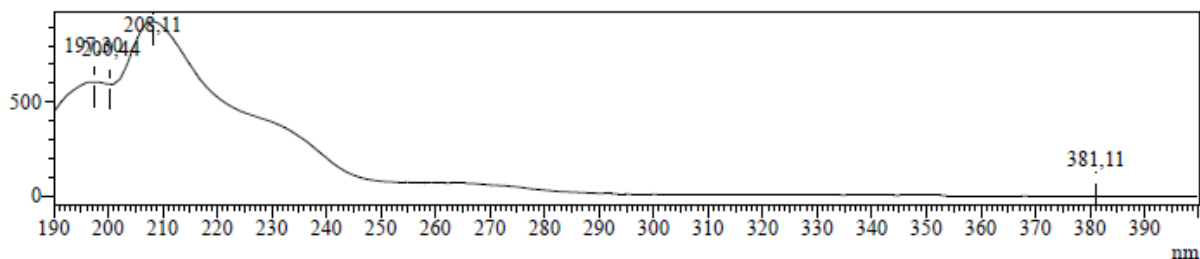

Peak# : 2  
Retention Time : 21,159 min  
Compound Name :  
Spectrum Operation:

mAU

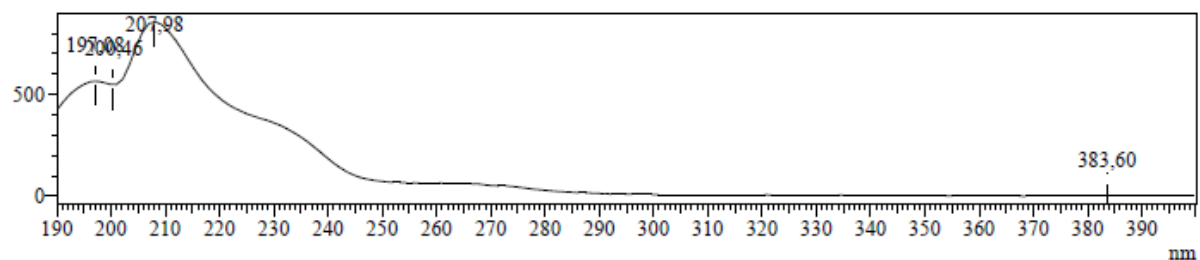

**(S)-hexane-1,2-diylbis(diphenylphosphane) borane complex (6da)**

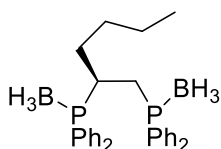

**Following general procedure B:** The reaction was performed with **1q** (0.1 mmol, 1 equiv.), manganese catalyst (0.005 mmol, 2.5 mol%), *t*PentOK (0.01 mmol, 10 mol%), **2a** (0.105 mmol, 1.05 equiv.), toluene (1.0 mL) at 25°C for 72 h, then Ti(O*i*Pr)<sub>4</sub> (0.03 mmol, 0.3 equiv), HSi(OEt)<sub>3</sub> (0.3 mmol, 3.0 equiv) at 120°C for 1h; finally, BH<sub>3</sub>·THF (0.3 mmol, 3.0 equiv) at rt for 1h. Product **6da** was obtained as a white solid after column chromatography (SiO<sub>2</sub>, pentane/dichloromethane = 2:1) [76% yield, 98% ee].

**<sup>1</sup>H NMR (CDCl<sub>3</sub>, 400 MHz):** δ 7.90 – 7.82 (m, 2H, CH<sub>Ar</sub>), 7.81 – 7.70 (m, 4H, CH<sub>Ar</sub>), 7.55 – 7.28 (m, 14H, CH<sub>Ar</sub>), 3.31 – 3.12 (m, 1H, CH), 2.74 – 2.57 (m, 1H, CH<sub>2</sub>CHCHH), 2.32 – 2.17 (m, 1H, CH<sub>2</sub>CHCHH), 1.69 – 1.46 (m, 2H), 1.30 – 1.17 (m, 5H), 0.98 – 0.83 (m, 3H), 0.67 – 0.60 (m, 2H, CH<sub>3</sub>CH<sub>2</sub>), 0.41 (t, *J* = 7.3 Hz, 3H, CH<sub>2</sub>CH<sub>3</sub>).

**<sup>13</sup>C NMR (CDCl<sub>3</sub>, 101 MHz):** δ 133.2, 133.1, 133.0, 132.9, 132.9, 132.8, 132.8, 131.8, 131.8, 131.7, 131.6, 131.6, 131.6, 131.5, 131.2, 131.2, 130.6, 130.1, 129.4, 129.3, 129.2, 129.2, 129.1, 129.1, 129.0, 129.0, 128.9, 128.9, 128.9, 128.8, 128.5, 128.5, 128.4, 127.9, 30.2, 30.2, 29.7, 29.7, 29.5, 29.5, 29.2, 29.1, 27.4, 27.4, 27.1, 27.1, 22.5, 13.4. (Due to C–P coupling and the complexity of the spectrum, doublets cannot be assigned and they are listed as singlets)

**<sup>31</sup>P NMR (CDCl<sub>3</sub>, 162 MHz):** δ 22.0, 13.9.

**HRMS (ESI, m/z):** calcd. for C<sub>30</sub>H<sub>38</sub>B<sub>2</sub>P<sub>2</sub>K [M+K]<sup>+</sup>: 521.2266, found: 521.2275.

**HPLC:** Chiracel-ADH, *n*-heptane/*i*-PrOH 98:02, 0.5 mL/min., 40 °C, detection at 204 nm. Retention time (min): 30.1 (minor) and 33.4 (major).

#### <Chromatogram>

mAU

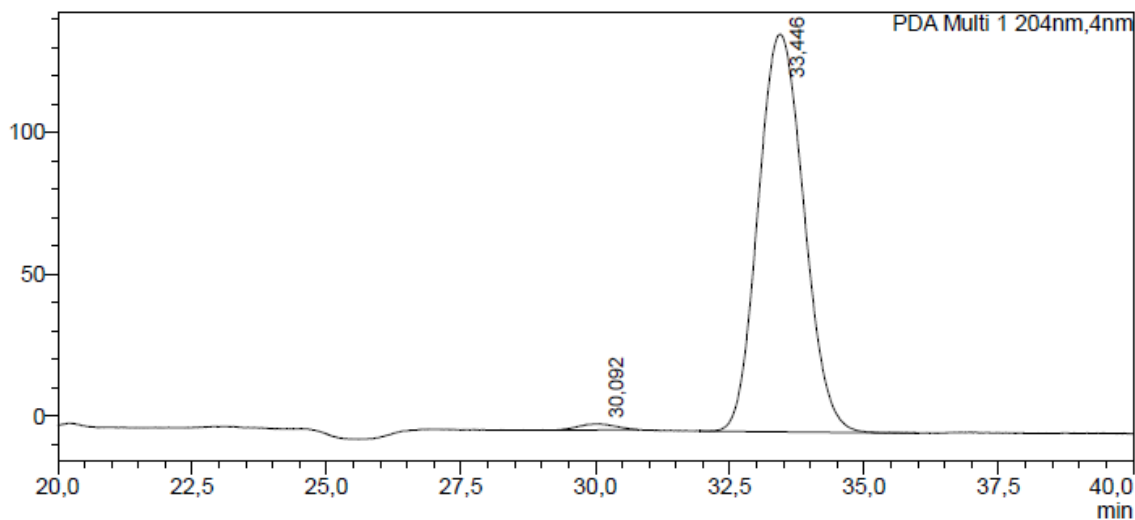

#### <Peak Table>

PDA Ch1 204nm

| Peak# | Ret. Time | Area    | Height | Area%   |
|-------|-----------|---------|--------|---------|
| 1     | 30,092    | 101049  | 2144   | 1,203   |
| 2     | 33,446    | 8299164 | 140172 | 98,797  |
| Total |           | 8400214 | 142317 | 100,000 |

**<Chromatogram>**

mAU

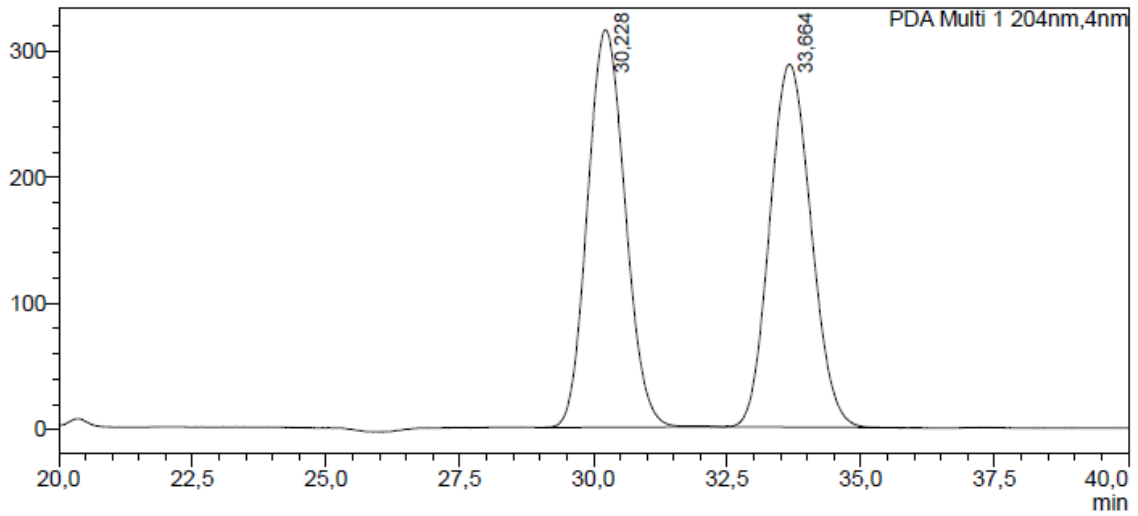

**<Peak Table>**

PDA Ch1 204nm

| Peak# | Ret. Time | Area     | Height | Area%   |
|-------|-----------|----------|--------|---------|
| 1     | 30,228    | 15454050 | 315432 | 49,979  |
| 2     | 33,664    | 15467254 | 287895 | 50,021  |
| Total |           | 30921304 | 603327 | 100,000 |

UV Spectrum

Peak# : 1  
 Retention Time : 30,228 min  
 Compound Name :  
 Spectrum Operation:

mAU

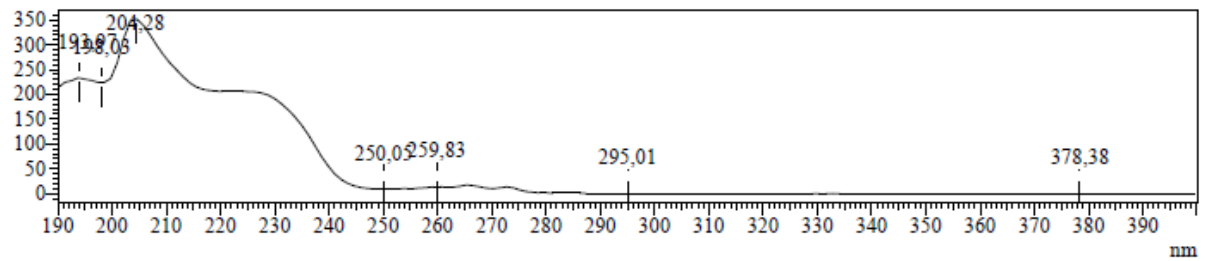

Peak# : 2  
 Retention Time : 33,664 min  
 Compound Name :  
 Spectrum Operation:

mAU

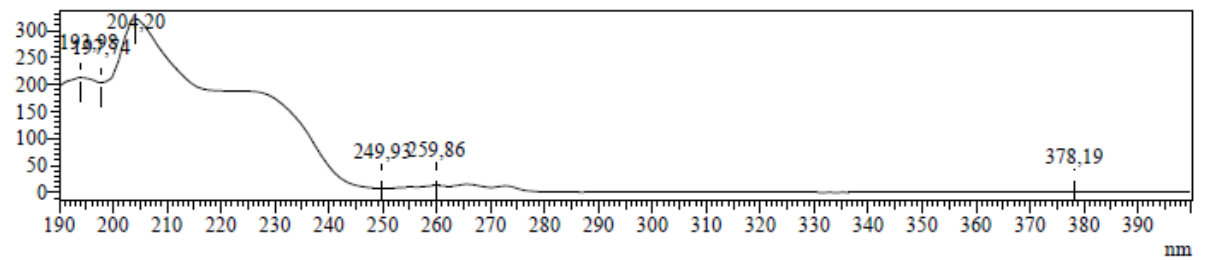

**(S)-(1-phenylethane-1,2-diyl)bis(diphenylphosphane) (7aa)**

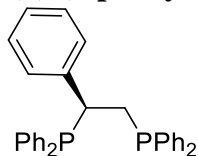

**Following general procedure C:** The reaction was performed with **6aa** (0.1 mmol, 1 equiv.), DABCO (0.40 mmol, 4.0 equiv) and degassed toluene (2.5 mL) at 50°C for 12 h. Product **7aa** was obtained as a white solid with 92% yield.

**<sup>1</sup>H NMR (Toluene-*d*<sub>8</sub>, 400 MHz):** δ 7.46 – 7.40 (m, 2H, CH<sub>Ar</sub>), 7.35 – 7.28 (m, 2H, CH<sub>Ar</sub>), 7.20 – 7.15 (m, 2H, CH<sub>Ar</sub>), 7.15 – 7.05 (m, 8H, CH<sub>Ar</sub>), 7.06 – 6.98 (m, 4H, CH<sub>Ar</sub>), 7.00 – 6.87 (m, 4H, CH<sub>Ar</sub>), 6.86 – 6.76 (m, 3H, CH<sub>Ar</sub>), 3.56 – 3.48 (m, 1H, PPh<sub>2</sub>CH), 2.69 – 2.59 (m, 2H, PPh<sub>2</sub>CHH).

**<sup>13</sup>C NMR (Toluene-*d*<sub>8</sub>, 101 MHz)** δ 141.2, 141.2, 141.2, 141.1, 139.9, 139.8, 139.0, 138.9, 137.8, 137.7, 137.6, 137.4, 137.3, 137.2, 134.6, 134.5, 134.5, 134.4, 133.6, 133.5, 132.5, 132.3, 129.9, 129.9, 129.3, 129.1, 128.8, 128.4, 128.4, 128.4, 128.4, 128.2, 128.0, 128.0, 126.6, 126.6, 42.8, 42.7, 42.6, 33.8, 33.7, 33.7, 33.6. (Due to C–P coupling and the complexity of the spectrum, doublets cannot be assigned and they are listed as singlets)

**<sup>31</sup>P NMR (Toluene-*d*<sub>8</sub>, 162 MHz)** δ 2.5 (d, *J* = 17.5 Hz), -21.0 (d, *J* = 17.5 Hz).

**HRMS (ESI, *m/z*):** calcd. for C<sub>32</sub>H<sub>29</sub>P<sub>2</sub> [M+H]<sup>+</sup>: 475.1739, found: 475.1743.

**(S)-(1-(4-methoxyphenyl)ethane-1,2-diyl)bis(diphenylphosphane) (7ba)**

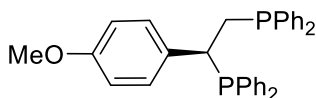

**Following general procedure C:** The reaction was performed with **6ba** (0.1 mmol, 1 equiv.), DABCO (0.40 mmol, 4.0 equiv) and degassed toluene (2.5 mL) at 50°C for 12 h. Product **7ba** was obtained as a white solid with 95% yield.

**<sup>1</sup>H NMR (Toluene-*d*<sub>8</sub>, 400 MHz):** δ 7.50 – 7.40 (m, 2H, CH<sub>Ar</sub>), 7.38 – 7.28 (m, 2H, CH<sub>Ar</sub>), 7.20 – 7.04 (m, 12H, CH<sub>Ar</sub>), 7.00 – 6.96 (m, 1H, CH<sub>Ar</sub>), 6.95 – 6.79 (m, 5H, CH<sub>Ar</sub>), 6.67 – 6.59 (m, 2H, CH<sub>Ar</sub>), 3.58 – 3.44 (m, 1H, PPh<sub>2</sub>CH), 3.28 (s, 3H, OCH<sub>3</sub>), 2.73 – 2.53 (m, 2H, PPh<sub>2</sub>CHH).

**<sup>13</sup>C NMR (Toluene-*d*<sub>8</sub>, 101 MHz):** δ 158.8, 158.8, 140.2, 140.0, 139.1, 139.0, 138.1, 138.1, 137.9, 137.9, 137.7, 134.7, 134.5, 134.5, 134.3, 133.7, 133.5, 132.9, 132.9, 132.8, 132.8, 132.5, 132.3, 130.8, 130.7, 129.3, 129.2, 128.8, 128.7, 128.4, 128.4, 128.0, 128.0, 128.0, 114.0, 54.5, 41.9, 41.8, 41.6, 34.3, 34.1, 34.1, 33.9. (Due to C–P coupling and the complexity of the spectrum, doublets cannot be assigned and they are listed as singlets)

**<sup>31</sup>P NMR (Toluene-*d*<sub>8</sub>, 162 MHz):** δ -1.4 (d, *J* = 17.2 Hz), -24.0 (d, *J* = 17.2 Hz).

**HRMS (ESI, *m/z*):** calcd. for C<sub>33</sub>H<sub>31</sub>OP<sub>2</sub> [M+H]<sup>+</sup>: 505.1845, found: 505.1857.

**(S)-(1-ferrocenylethane-1,2-diyl)bis(diphenylphosphane) (7ca)**

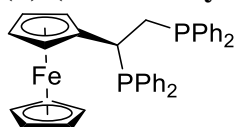

**Following general procedure C:** The reaction was performed with **6ca** (0.1 mmol, 1 equiv.), DABCO (0.40 mmol, 4.0 equiv) and degassed toluene (2.5 mL) at 50°C for 12 h. Product **7ca** was obtained as a yellow solid with 98% yield.

**<sup>1</sup>H NMR (CDCl<sub>3</sub>, 400 MHz):** δ 7.56 – 7.51 (m, 2H, CH<sub>Ar</sub>), 7.47 – 7.42 (m, 2H, CH<sub>Ar</sub>), 7.41 – 7.35 (m, 6H, CH<sub>Ar</sub>), 7.33 – 7.27 (m, 6H, CH<sub>Ar</sub>), 7.24 – 7.19 (m, 2H, CH<sub>Ar</sub>), 7.19 – 7.13 (m, 2H, CH<sub>Ar</sub>), 4.05 – 3.86 (m, 7H, CH<sub>Fe</sub>), 3.79 (s, 1H, CH<sub>Fe</sub>), 3.61 (s, 1H, CH<sub>Fe</sub>), 3.32 – 3.13 (m, 1H, PPh<sub>2</sub>CH), 2.81 – 2.63 (m, 1H, PPh<sub>2</sub>CHH), 2.37 – 2.27 (m, 1H, PPh<sub>2</sub>CHH).

**<sup>13</sup>C NMR (CDCl<sub>3</sub>, 101 MHz):** δ 139.2, 139.1, 139.0, 139.0, 137.8, 137.8, 137.7, 137.6, 135.6, 135.4, 134.2, 134.1, 133.5, 133.3, 132.9, 132.8, 132.8, 132.7, 129.1, 128.8, 128.5, 128.5, 128.4, 128.4, 128.0, 128.0, 127.8, 127.7, 127.7, 91.1, 91.0, 68.5, 68.0, 67.5, 67.0, 66.3, 36.5, 36.4, 36.4, 36.2, 32.5, 32.4, 32.4, 32.3. (Due to C–P coupling and the complexity of the spectrum, doublets cannot be assigned and they are listed as singlets)

**<sup>31</sup>P NMR (CDCl<sub>3</sub>, 162 MHz):** δ 6.1 (d, *J* = 64.7 Hz), -19.6 (d, *J* = 64.7 Hz).

**HRMS (ESI, m/z):** calcd. for C<sub>36</sub>H<sub>33</sub>FeP<sub>2</sub> [M+H]<sup>+</sup>: 583.1401, found: 583.1394.

#### (S)-hexane-1,2-diylbis(diphenylphosphane) (**7da**)

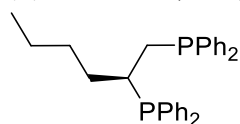

**Following general procedure C:** The reaction was performed with **6da** (0.1 mmol, 1 equiv.), DABCO (0.40 mmol, 4.0 equiv) and degassed toluene (2.5 mL) at 50°C for 12 h. Product **7da** was obtained as a white solid with 96% yield.

**<sup>1</sup>H NMR (Toluene-*d*<sub>8</sub>, 400 MHz):** δ 7.42 – 7.31 (m, 6H, CH<sub>Ar</sub>), 7.30 – 7.23 (m, 2H, CH<sub>Ar</sub>), 7.12 – 6.94 (m, 12H, CH<sub>Ar</sub>), 2.49 – 2.34 (m, 2H), 2.12 – 2.06 (m, 1H), 2.00 – 1.87 (m, 1H), 1.84 – 1.75 (m, 1H), 1.72 – 1.61 (m, 1H), 1.56 – 1.46 (m, 1H), 1.29 – 1.17 (m, 2H), 0.84 (t, *J* = 7.4 Hz, 3H, CH<sub>3</sub>).

**<sup>13</sup>C NMR (Toluene-*d*<sub>8</sub>, 101 MHz):** δ 140.1, 140.0, 139.3, 139.2, 138.1, 138.0, 137.6, 137.6, 137.3, 137.3, 134.6, 134.4, 134.4, 134.2, 133.8, 133.7, 132.7, 132.6, 129.2, 129.1, 128.9, 128.6, 128.6, 128.6, 128.5, 128.1, 128.5, 128.2, 33.2, 33.1, 33.1, 33.0, 31.2, 31.2, 31.1, 31.1, 31.1, 31.0, 29.6, 29.6, 29.5, 23.4, 14.2. (Due to C–P coupling and the complexity of the spectrum, doublets cannot be assigned and they are listed as singlets)

**<sup>31</sup>P NMR (Toluene-*d*<sub>8</sub>, 162 MHz):** δ -3.8 (d, *J* = 21.2 Hz), -20.5 (d, *J* = 21.2 Hz).

**HRMS (ESI, m/z):** calcd. for C<sub>30</sub>H<sub>33</sub>P<sub>2</sub> [M+H]<sup>+</sup>: 455.2052, found: 455.2052.

## 4. Application of **7ca** in the catalytic asymmetric hydrophosphination of **1a** and **8**

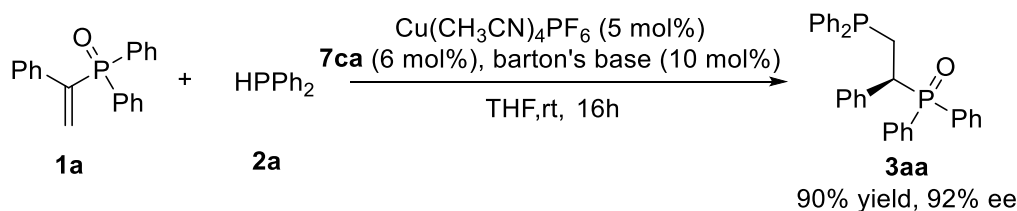

**General Procedure for hydrophosphination of **1a**:** In a 4 mL oven dried vial equipped with a magnetic stirring bar was charged with [Cu(CH<sub>3</sub>CN)<sub>4</sub>]PF<sub>6</sub> (0.005 mmol, 5 mol%) and **7ca**

(0.005 mmol, 6 mol%) in a glove box under N<sub>2</sub> atmosphere. Anhydrous THF (1.0 mL) was added. The mixture was stirred at room temperature for 15 minutes to give a yellow catalyst solution. Then **1a** (0.1 mmol, 1.0 equiv) and **2a** (0.1 mmol, 1.0 equiv) were added sequentially and stirred for 2 min. Barton's Base (0.01 mmol, 10 mol%) was added. The resulting reaction mixture was stirred at room temperature for 16 hours. Then, the reaction mixture was concentrated under reduced pressure, the residue was purified by silica gel column chromatography (SiO<sub>2</sub>, pentane/ethyl acetate/methanol = 1:1:0.05) to give the desired product **3aa** [90% yield, 92% ee].

**HPLC:** Chiracel-ADH, *n*-heptane/*i*-PrOH 80:20, 1.0 mL/min., 40 °C, detection at 206 nm. Retention time (min): 12.9 (minor) and 16.6 (major).

**<Chromatogram>**

mAU

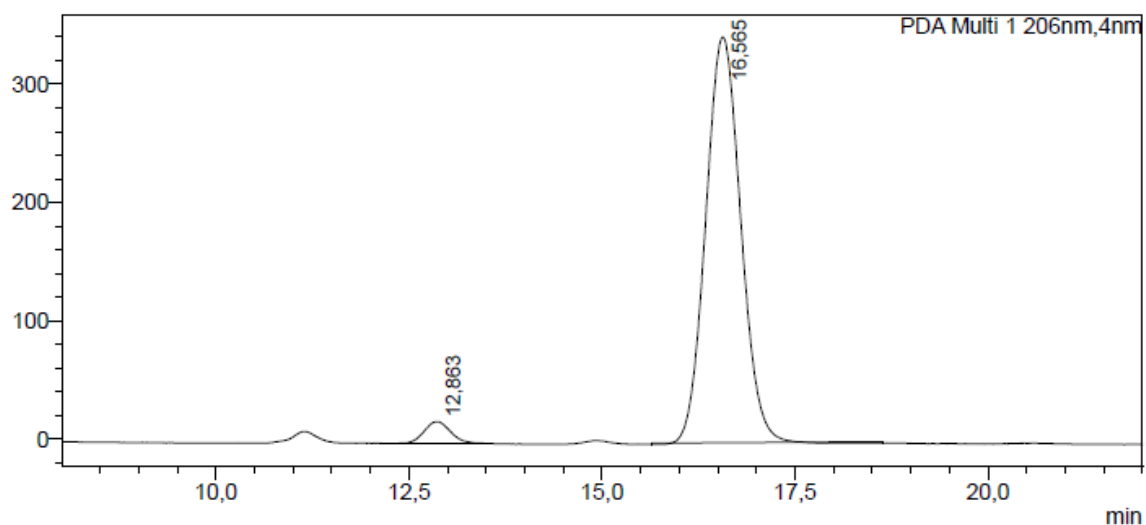

**<Peak Table>**

PDA Ch1 206nm

| Peak# | Ret. Time | Area     | Height | Area%   |
|-------|-----------|----------|--------|---------|
| 1     | 12,863    | 438078   | 18481  | 3,923   |
| 2     | 16,565    | 10728322 | 342696 | 96,077  |
| Total |           | 11166400 | 361178 | 100,000 |

### <Chromatogram>

mAU



### <Peak Table>

PDA Ch1 206nm

| Peak# | Ret. Time | Area     | Height | Area%   |
|-------|-----------|----------|--------|---------|
| 1     | 12,839    | 5752588  | 241197 | 50,190  |
| 2     | 16,567    | 5709111  | 182401 | 49,810  |
| Total |           | 11461699 | 423597 | 100,000 |

### UV Spectrum

Peak# : 1  
 Retention Time : 12,839 min  
 Compound Name :  
 Spectrum Operation:

mAU

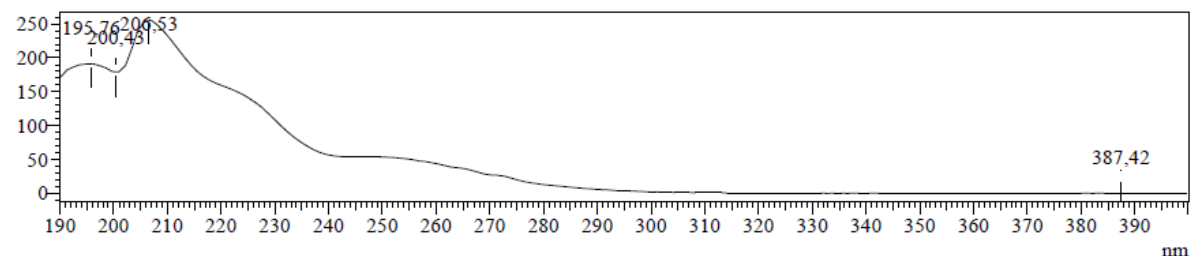

Peak# : 2  
 Retention Time : 16,567 min  
 Compound Name :  
 Spectrum Operation:

mAU

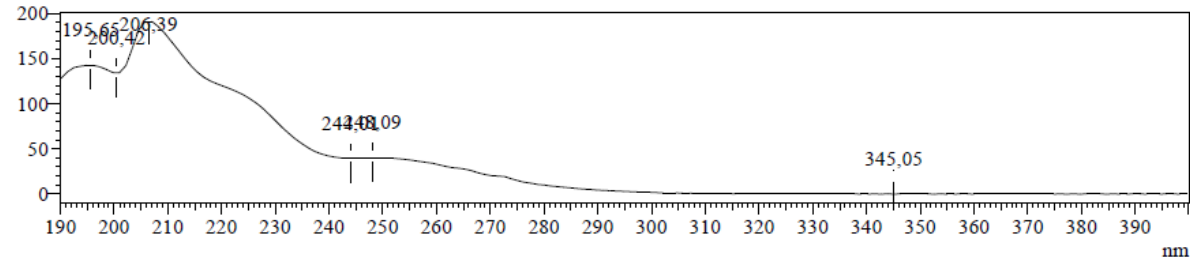



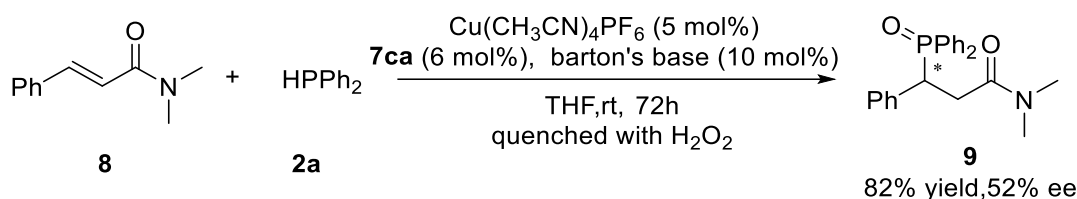

**General Procedure for hydrophosphination of 8:** In a 4 mL oven dried vial equipped with a magnetic stirring bar was charged with  $[\text{Cu}(\text{CH}_3\text{CN})_4]\text{PF}_6$  (0.005 mmol, 5 mol%) and **7ca** (0.005 mmol, 6 mol%) in a glove box under  $\text{N}_2$  atmosphere. Anhydrous THF (1.0 mL) was added. The mixture was stirred at room temperature for 15 minutes to give a yellow catalyst solution. Then **8** (0.1 mmol, 1.0 equiv) and **2a** (0.1 mmol, 1.0 equiv) were added sequentially and stirred for 2 min. Barton's Base (0.01 mmol, 10 mol%) was added. The resulting reaction mixture was stirred at room temperature for 72 hours. Then, the reaction mixture was quenched by 30%  $\text{H}_2\text{O}_2$  aqueous solution (25  $\mu\text{L}$ ) and was stirred for additional 30 minutes at room temperature. After solvent was removed under reduced pressure, the residue was purified by silica gel column chromatography ( $\text{SiO}_2$ , pentane/ethyl acetate/methanol = 1:1:0.05) to give the desired product **9** [82% yield, 52% ee].

The NMR data are in agreement with the one present in literature.<sup>2</sup>

**$^1\text{H}$  NMR ( $\text{CDCl}_3$ , 400 MHz):**  $\delta$  8.00 – 7.93 (m, 2H,  $\text{CH}_{\text{Ar}}$ ), 7.53 – 7.50 (m, 3H,  $\text{CH}_{\text{Ar}}$ ), 7.41 – 7.36 (m, 2H,  $\text{CH}_{\text{Ar}}$ ), 7.33 – 7.31 (m, 2H,  $\text{CH}_{\text{Ar}}$ ), 7.28 – 7.24 (m, 1H,  $\text{CH}_{\text{Ar}}$ ), 7.19 – 7.06 (m, 5H,  $\text{CH}_{\text{Ar}}$ ), 4.36 – 4.31 (m, 1H), 3.21 – 3.13 (m, 1H), 2.84 – 2.71 (m, 7H).

**HPLC:** Chiracel-ADH, *n*-heptane/*i*-PrOH 80:20, 1.0 mL/min., 40 °C, detection at 220 nm. Retention time (min): 13.8 (minor) and 17.0 (major).

#### <Chromatogram>

mAU

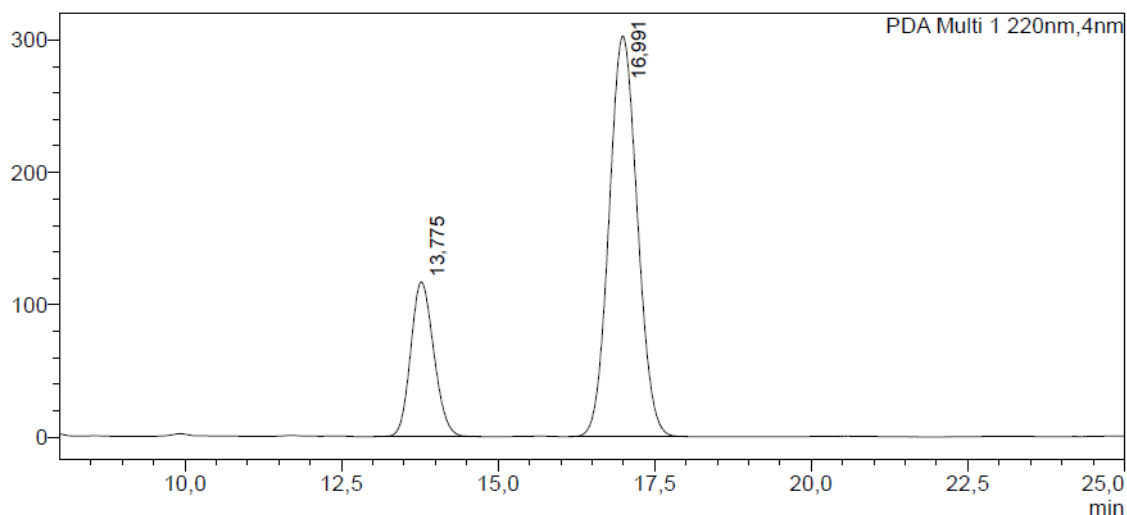

#### <Peak Table>

PDA Ch1 220nm

| Peak# | Ret. Time | Area     | Height | Area%   |
|-------|-----------|----------|--------|---------|
| 1     | 13,775    | 3005867  | 116797 | 24,024  |
| 2     | 16,991    | 9506153  | 302684 | 75,976  |
| Total |           | 12512020 | 419481 | 100,000 |

### <Chromatogram>

mAU

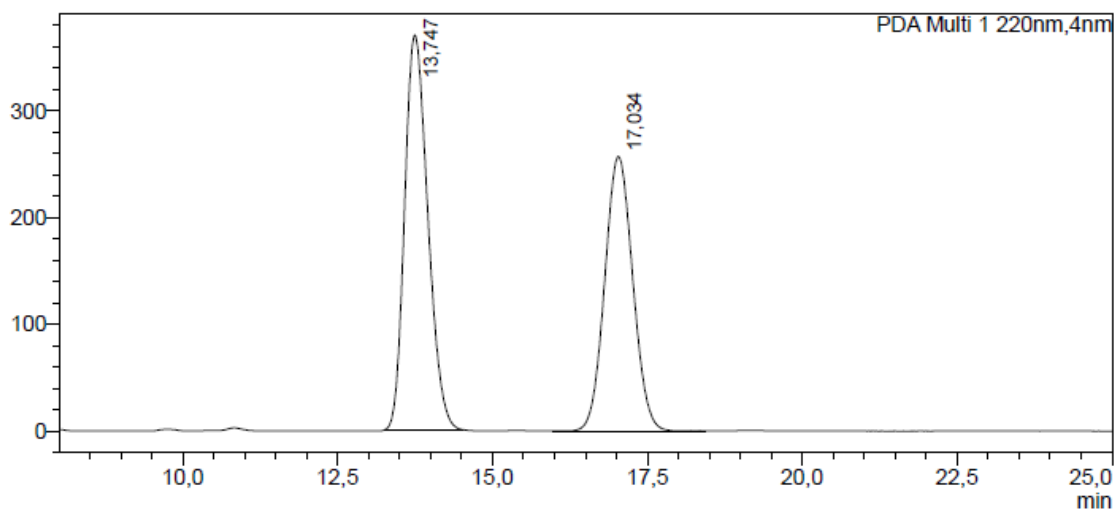

### <Peak Table>

PDA Ch1 220nm

| Peak# | Ret. Time | Area     | Height | Area%   |
|-------|-----------|----------|--------|---------|
| 1     | 13,747    | 9643914  | 370014 | 54,350  |
| 2     | 17,034    | 8100020  | 257258 | 45,650  |
| Total |           | 17743934 | 627272 | 100,000 |

### UV Spectrum

Peak# : 1  
 Retention Time : 13,747 min  
 Compound Name :  
 Spectrum Operation:

mAU

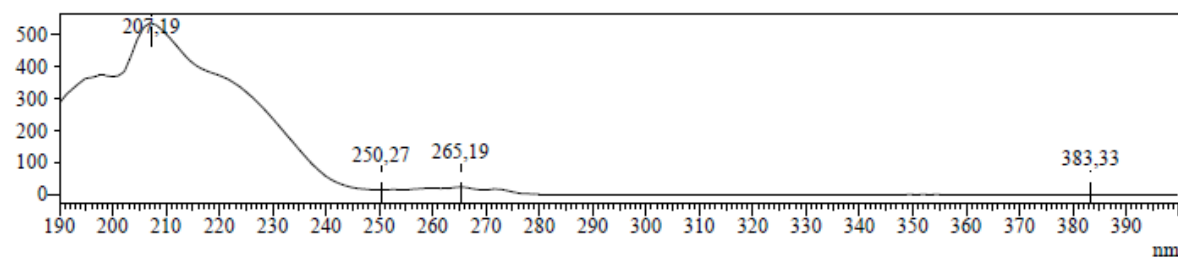

Peak# : 2  
 Retention Time : 17,034 min  
 Compound Name :  
 Spectrum Operation:

mAU

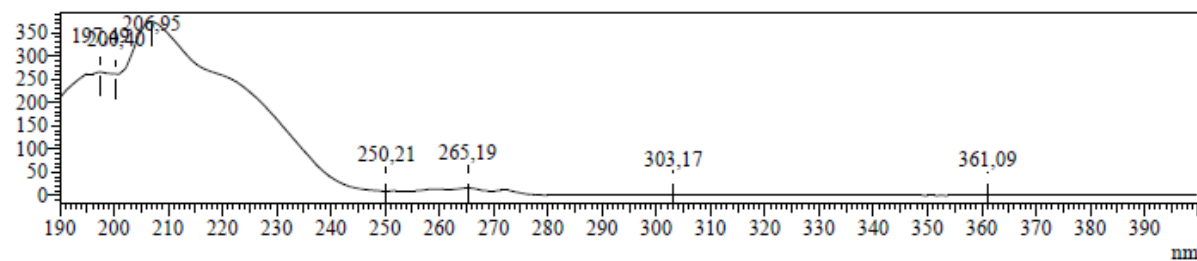

## 5. Substrate Synthesis

$\alpha$ ,  $\beta$ -unsaturated phosphine oxides **1a–1y** were synthesized by a known literature procedure (Method A),<sup>3</sup> among them **1g–1l**, **1n**, **1o**, **1q–1s**, **1u**, and **1w–1y** are new compounds.  $\alpha$ ,  $\beta$ -unsaturated phosphonates **1'a–1'e** were synthesized by a known literature procedure (Method B).<sup>4</sup>  $\alpha$ ,  $\beta$ -unsaturated phosphine oxide **1z** was synthesized by a known literature procedure (Method C).<sup>5</sup> The mesityl(phenyl)phosphane (**2h**) was synthesized by a known literature procedure.<sup>6</sup> The spectroscopic data of new compounds are shown below.

### Method A:

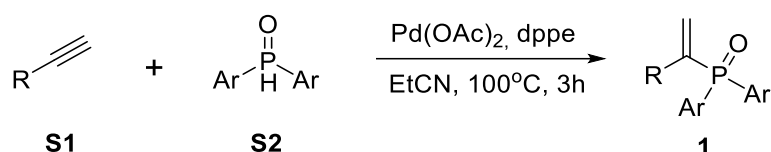

A mixture of Pd(OAc)<sub>2</sub> (5 mol%), dppe (7.5 mol%), diarylphosphine oxide **S2** (1.0 equiv), and acetylene derivative **S1** (1.1 equiv) dissolved in propionitrile (3 ml/mmol) was heated at 100 °C for 3 h. The resulting mixture was evaporated and the residue was purified by column chromatography using pentane/ethyl acetate (1/1) afforded the product **1**.

### Method B:

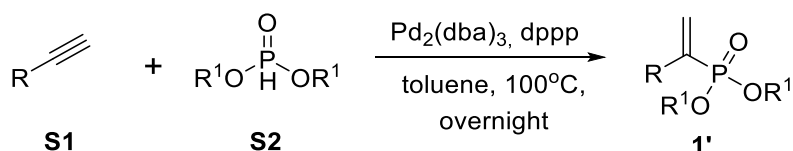

An oven-dried schlenk tube containing a Teflon-coated stir bar was charged with 0.5 mol% Pd<sub>2</sub>(dba)<sub>3</sub>, 1 mol% dppp and toluene (2 ml/mmol) under N<sub>2</sub> atmosphere and stirred at room temperature for 10 min, then H-phosphonate **S2** (1.0 equiv) and alkyne **S1** (1.0 equiv) were added and the mixture was stirred at 100 °C overnight. The resulting mixture was evaporated and the residue was purified by column chromatography using pentane /ethyl acetate (3/1) afforded the product **1'**.

### Method C:

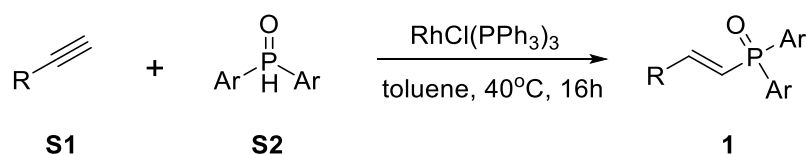

Diarylphosphine oxide **S2** (1.0 equiv), alkyne **S1** (1.1 equiv) and RhCl(PPh<sub>3</sub>)<sub>3</sub> (3 mol %) were dissolved in dry toluene (2 ml/mmol) under N<sub>2</sub> atmosphere. The resulting transparent yellow

solution was heated at 40 °C for 16h. The solvent was evaporated under reduced pressure to give a yellow semisolid. The crude product was then purified by column chromatography using pentane /ethyl acetate (2/1) afforded the product **1**.

**(1-([1,1'-biphenyl]-4-yl)vinyl)diphenylphosphine oxide (1g)**

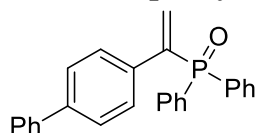

The product was synthesized following **Method A** obtained after column chromatography (SiO<sub>2</sub>, EA:Pentane = 1:1) as a white solid 46% of yield.

**<sup>1</sup>H NMR (CDCl<sub>3</sub>, 400 MHz):** δ 7.82 – 7.70 (m, 4H, CH<sub>Ar</sub>), 7.61 – 7.36 (m, 14H, CH<sub>Ar</sub>), 7.35 – 7.30 (m, 1H, CH<sub>Ar</sub>), 6.30 (dd, *J* = 40.4, 1.1 Hz, 1H, CHH), 5.74 (dd, *J* = 19.8, 1.1 Hz, 1H, CHH).

**<sup>13</sup>C NMR (CDCl<sub>3</sub>, 101 MHz):** δ 144.0 (d, *J* = 92.6 Hz), 141.1, 140.5 136.6 (d, *J* = 9.9 Hz), 132.2, 132.1, 132.0, 131.9 (d, *J* = 103.5 Hz), 131.8 (d, *J* = 10.0 Hz), 128.9, 128.6 (d, *J* = 12.1 Hz), 128.6 (d, *J* = 4.7 Hz), 127.6, 127.2 (d, *J* = 12.5 Hz).

**<sup>31</sup>P NMR (CDCl<sub>3</sub>, 162 MHz):** δ 30.3.

**HRMS (ESI, m/z):** calcd. for C<sub>26</sub>H<sub>22</sub>OP [M+H]<sup>+</sup>: 381.1403, found: 381.1407.

**methyl 4-(1-(diphenylphosphoryl)vinyl)benzoate (1h)**

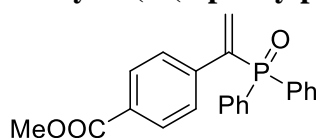

The product was synthesized following **Method A** obtained after column chromatography (SiO<sub>2</sub>, EA:Pentane = 1:1) as a white solid 46% of yield.

**<sup>1</sup>H NMR (CDCl<sub>3</sub>, 400 MHz):** δ 7.95 – 7.85 (m, 2H, CH<sub>Ar</sub>), 7.77 – 7.64 (m, 4H, CH<sub>Ar</sub>), 7.60 – 7.54 (m, 2H, CH<sub>Ar</sub>), 7.54 – 7.47 (m, 2H, CH<sub>Ar</sub>), 7.47 – 7.38 (m, 4H, CH<sub>Ar</sub>), 6.29 (d, *J* = 39.6 Hz, 1H, CHH), 5.79 (d, *J* = 19.6 Hz, 1H, CHH), 3.86 (s, 3H, COOCH<sub>3</sub>).

**<sup>13</sup>C NMR (CDCl<sub>3</sub>, 101 MHz):** δ 166.8, 144.0 (d, *J* = 92.4 Hz), 142.3 (d, *J* = 9.9 Hz), 133.1 (d, *J* = 9.3 Hz), 132.2 (d, *J* = 2.9 Hz), 132.0 (d, *J* = 9.8 Hz), 131.2 (d, *J* = 104.0 Hz), 129.8, 129.8, 128.7 (d, *J* = 12.3 Hz), 128.2 (d, *J* = 4.6 Hz), 52.2.

**<sup>31</sup>P NMR (CDCl<sub>3</sub>, 162 MHz):** δ 26.8.

**HRMS (ESI, m/z):** calcd. for C<sub>22</sub>H<sub>20</sub>O<sub>3</sub>P [M+H]<sup>+</sup>: 363.1145, found: 363.1147.

**diphenyl(1-(m-tolyl)vinyl)phosphine oxide (1i)**

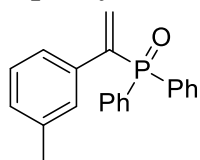

The product was synthesized following **Method A** obtained after column chromatography (SiO<sub>2</sub>, EA:Pentane = 1:1) as a white solid 57% of yield.

**<sup>1</sup>H NMR (CDCl<sub>3</sub>, 400 MHz):** δ 7.75 – 7.64 (m, 4H, CH<sub>Ar</sub>), 7.53 – 7.46 (m, 2H, CH<sub>Ar</sub>), 7.45 – 7.36 (m, 4H, CH<sub>Ar</sub>), 7.27 – 7.19 (m, 2H, CH<sub>Ar</sub>), 7.12 – 7.09 (m, 1H, CH<sub>Ar</sub>), 7.03 (d, *J* = 7.6 Hz,

1H,  $CH_{Ar}$ ), 6.21 (dd,  $J = 40.2, 1.2$  Hz, 1H, CHH), 5.73 (dd,  $J = 19.7, 0.9$  Hz, 1H, CHH), 2.24 (s, 3H,  $CH_3$ ).

$^{13}C$  NMR ( $CDCl_3$ , 101 MHz):  $\delta$  144.5 (d,  $J = 92.3$  Hz), 138.1, 137.6 (d,  $J = 9.9$  Hz), 132.1 (d,  $J = 9.5$  Hz), 132.0, 132.0, 131.8 (d,  $J = 103.5$  Hz), 129.1, 128.9 (d,  $J = 4.5$  Hz), 128.8 (d,  $J = 13.5$  Hz), 128.4, 125.4 (d,  $J = 4.7$  Hz), 21.5.

$^{31}P$  NMR (162 MHz,  $CDCl_3$ ):  $\delta$  27.0.

HRMS (ESI,  $m/z$ ): calcd. for  $C_{21}H_{20}OP$   $[M+H]^+$ : 319.1246, found: 319.1243.

**(1-(3-chlorophenyl)vinyl)diphenylphosphine oxide (1j)**

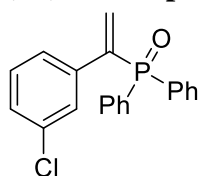

The product was synthesized following **Method A** obtained after column chromatography ( $SiO_2$ , EA:Pentane = 1:1) as a white solid 66% of yield.

$^1H$  NMR ( $CDCl_3$ , 400 MHz):  $\delta$  7.78 – 7.64 (m, 4H,  $CH_{Ar}$ ), 7.57 – 7.35 (m, 8H,  $CH_{Ar}$ ), 7.25 – 7.08 (m, 2H,  $CH_{Ar}$ ), 6.23 (d,  $J = 39.6$  Hz, 1H, CHH), 5.74 (d,  $J = 19.5$  Hz, 1H, CHH).

$^{13}C$  NMR ( $CDCl_3$ , 101 MHz):  $\delta$  143.5 (d,  $J = 92.6$  Hz), 139.4 (d,  $J = 9.9$  Hz), 134.4, 132.8 (d,  $J = 9.6$  Hz), 132.2 (d,  $J = 2.8$  Hz), 132.0 (d,  $J = 9.8$  Hz), 131.3 (d,  $J = 104.1$  Hz), 129.8, 128.7 (d,  $J = 12.1$  Hz), 128.4, 128.1 (d,  $J = 4.9$  Hz), 126.6 (d,  $J = 4.4$  Hz).

$^{31}P$  NMR ( $CDCl_3$ , 162 MHz):  $\delta$  26.9.

HRMS (ESI,  $m/z$ ): calcd. for  $C_{20}H_{17}ClOP$   $[M+H]^+$ : 339.0700, found: 339.0701.

**(1-(3-methoxyphenyl)vinyl)diphenylphosphine oxide (1k)**

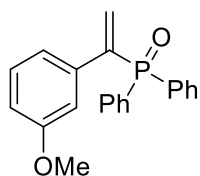

The product was synthesized following **Method A** obtained after column chromatography ( $SiO_2$ , EA:Pentane = 1:1) as a white solid 70% of yield.

$^1H$  NMR ( $CDCl_3$ , 400 MHz):  $\delta$  7.78 – 7.64 (m, 4H,  $CH_{Ar}$ ), 7.56 – 7.47 (m, 2H,  $CH_{Ar}$ ), 7.47 – 7.39 (m, 4H,  $CH_{Ar}$ ), 7.17 – 7.13 (m, 1H,  $CH_{Ar}$ ), 7.06 – 6.96 (m, 2H,  $CH_{Ar}$ ), 6.83 – 6.74 (m, 1H,  $CH_{Ar}$ ), 6.25 (dd,  $J = 39.8, 0.8$  Hz, 1H, CHH), 5.85 – 5.73 (m, 1H, CHH), 3.67 (s, 3H,  $OCH_3$ ).

$^{13}C$  NMR ( $CDCl_3$ , 101 MHz):  $\delta$  159.3, 144.2 (d,  $J = 92.4$  Hz), 138.9 (d,  $J = 10.3$  Hz), 132.1, 132.0 (d,  $J = 9.6$  Hz), 131.9, 131.1, 129.4, 128.4 (d,  $J = 12.1$  Hz), 120.6 (d,  $J = 4.8$  Hz), 114.2, 113.3 (d,  $J = 4.6$  Hz), 55.1.

$^{31}P$  NMR ( $CDCl_3$ , 162 MHz):  $\delta$  29.5.

HRMS (ESI,  $m/z$ ): calcd. for  $C_{21}H_{20}O_2P$   $[M+H]^+$ : 335.1195, found: 335.1197.

**(1-(2-fluorophenyl)vinyl)diphenylphosphine oxide (3l)**

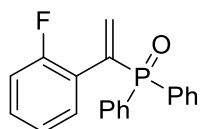

The product was synthesized following **Method A** obtained after column chromatography (SiO<sub>2</sub>, EA:Pentane = 1:1) as a white solid 70% of yield.

**<sup>1</sup>H NMR (CDCl<sub>3</sub>, 400 MHz):** δ 7.79 – 7.69 (m, 4H, CH<sub>Ar</sub>), 7.55 – 7.47 (m, 3H, CH<sub>Ar</sub>), 7.47 – 7.38 (m, 4H, CH<sub>Ar</sub>), 7.24 – 7.12 (m, 1H, CH<sub>Ar</sub>), 7.03 – 6.92 (m, 2H, CH<sub>Ar</sub>), 6.29 (d, *J* = 40.1 Hz, 1H, CHH), 6.03 (d, *J* = 19.8 Hz, 1H, CHH).

**<sup>13</sup>C NMR (CDCl<sub>3</sub>, 101 MHz):** δ 159.6 (dd, *J* = 247.7, 5.6 Hz), 138.0 (d, *J* = 94.3 Hz), 135.7 (dd, *J* = 8.8, 3.4 Hz), 132.1, 132.1, 132.0, 131.7, 131.3, 131.3, 131.3, 130.7, 129.8 (dd, *J* = 8.3, 1.4 Hz), 128.6 (d, *J* = 12.2 Hz), 125.0 (dd, *J* = 14.2, 10.4 Hz), 124.0 (dd, *J* = 3.7, 1.3 Hz), 115.9 (d, *J* = 22.6 Hz).

**<sup>31</sup>P NMR (CDCl<sub>3</sub>, 162 MHz):** δ 30.0.

**<sup>19</sup>F NMR (CDCl<sub>3</sub>, 376 MHz)** δ -115.4.

**HRMS (ESI, m/Z):** calcd. for C<sub>20</sub>H<sub>16</sub>FOP [M+H]<sup>+</sup>: 323.0996, found: 323.0999.

**diphenyl(1-(thiophen-3-yl)vinyl)phosphine oxide (1n)**

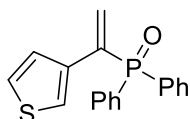

The product was synthesized following **Method A** obtained after column chromatography (SiO<sub>2</sub>, EA:Pentane = 1:1) as a white solid 71% of yield.

**<sup>1</sup>H NMR (CDCl<sub>3</sub>, 400 MHz):** δ 7.77 – 7.65 (m, 4H, CH<sub>Ar</sub>), 7.56 – 7.48 (m, 3H, CH<sub>Ar</sub>), 7.48 – 7.40 (m, 4H, CH<sub>Ar</sub>), 7.24 – 7.16 (m, 2H, CH<sub>Ar</sub>), 6.29 (d, *J* = 40.7 Hz, 1H, CHH), 5.58 (d, *J* = 20.0 Hz, 1H, CHH).

**<sup>13</sup>C NMR (CDCl<sub>3</sub>, 101 MHz):** δ 138.5 (d, *J* = 94.9 Hz), 137.2, 132.0, 131.9, 131.0, 129.4 (d, *J* = 9.3 Hz), 128.5 (d, *J* = 12.2 Hz), 126.5 (d, *J* = 6.0 Hz), 125.6, 124.8 (d, *J* = 3.5 Hz).

**<sup>31</sup>P NMR (CDCl<sub>3</sub>, 162 MHz):** δ 30.7.

**HRMS (ESI, m/Z):** calcd. for C<sub>18</sub>H<sub>16</sub>OPS [M+H]<sup>+</sup>: 311.0654, found: 311.0653.

**diphenyl(1-(pyridin-3-yl)vinyl)phosphine oxide (1o)**

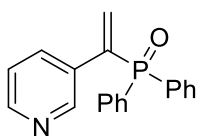

The product was synthesized following **Method A** obtained after column chromatography (SiO<sub>2</sub>, EA:Pentane = 1:1) as a white solid 66% of yield.

**<sup>1</sup>H NMR (CDCl<sub>3</sub>, 400 MHz):** δ 8.62 (s, 1H, CH<sub>Ar</sub>), 8.47 (d, *J* = 4.9 Hz, 1H, CH<sub>Ar</sub>), 7.98 – 7.89 (m, 1H, CH<sub>Ar</sub>), 7.78 – 7.64 (m, 4H, CH<sub>Ar</sub>), 7.56 – 7.49 (m, 2H, CH<sub>Ar</sub>), 7.49 – 7.41 (m, 4H, CH<sub>Ar</sub>), 7.16 (dd, *J* = 8.0, 4.8 Hz, 1H, CH<sub>Ar</sub>), 6.27 (d, *J* = 39.5 Hz, 1H, CHH), 5.77 (d, *J* = 19.5 Hz, 1H, CHH).

**<sup>13</sup>C NMR (CDCl<sub>3</sub>, 101 MHz):** δ 149.3 (d, *J* = 1.3 Hz), 148.6 (d, *J* = 5.5 Hz), 141.7 (d, *J* = 92.7 Hz), 136.0 (d, *J* = 3.6 Hz), 133.8 (d, *J* = 9.8 Hz), 133.0 (d, *J* = 9.4 Hz), 132.3 (d, *J* = 2.8 Hz), 132.0 (d, *J* = 9.7 Hz), 130.9 (d, *J* = 104.2 Hz), 128.8 (d, *J* = 12.3 Hz), 123.2.

**<sup>31</sup>P NMR (CDCl<sub>3</sub>, 162 MHz):** δ 30.0.

**HRMS (ESI, m/Z):** calcd. for C<sub>19</sub>H<sub>16</sub>NOP [M+H]<sup>+</sup>: 306.1042, found: 306.1046.

### hex-1-en-2-yl)diphenylphosphine oxide (1q)

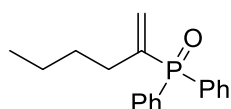

The product was synthesized following **Method A** obtained after column chromatography (SiO<sub>2</sub>, EA:Pentane = 1:1) as a white solid 67% of yield.

**<sup>1</sup>H NMR (CDCl<sub>3</sub>, 400 MHz):** δ 7.76 – 7.63 (m, 4H, CH<sub>Ar</sub>), 7.59 – 7.35 (m, 6H, CH<sub>Ar</sub>), 5.93 (d, *J* = 43.1 Hz, 1H, CH<sub>2</sub>CCHH), 5.60 (d, *J* = 20.9 Hz, 1H, CH<sub>2</sub>CCHH), 2.30 (q, *J* = 8.6 Hz, 2H), 1.54 – 1.38 (m, 2H), 1.33 – 1.19 (m, 2H), 0.82 (t, *J* = 7.3 Hz, 3H, CH<sub>3</sub>).

**<sup>13</sup>C NMR (CDCl<sub>3</sub>, 101 MHz):** δ 144.2 (d, *J* = 91.5 Hz), 132.1, 132.0, 131.0, 128.8, 128.6 (d, *J* = 12.0 Hz), 31.4 (d, *J* = 10.4 Hz), 30.3 (d, *J* = 5.4 Hz), 22.4, 14.0.

**<sup>31</sup>P NMR (CDCl<sub>3</sub>, 162 MHz):** δ 28.8.

**HRMS (ESI, m/z):** calcd. for C<sub>18</sub>H<sub>22</sub>OP [M+H]<sup>+</sup>: 285.1403, found: 285.1406.

### (3-cyclohexylprop-1-en-2-yl)diphenylphosphine oxide (1r)

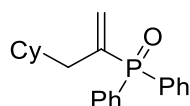

The product was synthesized following **Method A** obtained after column chromatography (SiO<sub>2</sub>, EA:Pentane = 1:1) as a white solid 86% of yield.

**<sup>1</sup>H NMR (CDCl<sub>3</sub>, 400 MHz):** δ 7.74 – 7.63 (m, 4H, CH<sub>Ar</sub>), 7.57 – 7.40 (m, 6H, CH<sub>Ar</sub>), 5.88 (dd, *J* = 43.2, 1.1 Hz, 1H, C=CHH), 5.63 (d, *J* = 20.8 Hz, 1H, C=CHH), 2.19 (dd, *J* = 12.0, 7.0 Hz, 2H, CH<sub>2</sub>=CCH<sub>2</sub>), 1.74 – 1.51 (m, 5H), 1.50 – 1.35 (m, 1H), 1.17 – 0.99 (m, 3H), 0.84 – 0.67 (m, 2H).

**<sup>13</sup>C NMR (CDCl<sub>3</sub>, 101 MHz):** δ 142.1 (d, *J* = 91.0 Hz), 131.9 (d, *J* = 9.6 Hz), 131.8 (d, *J* = 2.6 Hz), 131.6 (d, *J* = 101.3 Hz), 129.8 (d, *J* = 10.1 Hz), 128.4 (d, *J* = 12.0 Hz), 39.9 (d, *J* = 10.1 Hz), 35.8 (d, *J* = 4.0 Hz), 33.0, 26.4, 26.1.

**<sup>31</sup>P NMR (CDCl<sub>3</sub>, 162 MHz):** δ 31.6.

**HRMS (ESI, m/z):** calcd. for C<sub>21</sub>H<sub>26</sub>OP [M+H]<sup>+</sup>: 325.1716, found: 325.1720.

### (1-cyclopropylvinyl)diphenylphosphine oxide (1s)

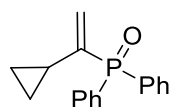

The product was synthesized following **Method A** obtained after column chromatography (SiO<sub>2</sub>, EA:Pentane = 1:1) as a white solid 56% of yield.

**<sup>1</sup>H NMR (CDCl<sub>3</sub>, 400 MHz):** δ 7.79 – 7.69 (m, 4H, CH<sub>Ar</sub>), 7.57 – 7.48 (m, 2H, CH<sub>Ar</sub>), 7.49 – 7.42 (m, 4H, CH<sub>Ar</sub>), 5.65 (d, *J* = 40.5 Hz, 1H, C=CHH), 5.60 (d, *J* = 20.0 Hz, 1H, C=CHH), 1.62 – 1.48 (m, 1H, CH<sub>2</sub>CH<sub>2</sub>CH), 0.80 – 0.67 (m, 2H, CHCH<sub>2</sub>CH<sub>2</sub>), 0.60 – 0.52 (m, 2H, CHCH<sub>2</sub>CH<sub>2</sub>).

**<sup>13</sup>C NMR (CDCl<sub>3</sub>, 101 MHz):** δ 145.8 (d, *J* = 93.5 Hz), 132.0 (d, *J* = 9.8 Hz), 131.8 (d, *J* = 2.6 Hz), 131.6 (d, *J* = 102.0 Hz), 128.4 (d, *J* = 11.9 Hz), 124.6 (d, *J* = 9.9 Hz), 12.8 (d, *J* = 16.2 Hz), 8.9 (d, *J* = 3.7 Hz).

**<sup>31</sup>P NMR (CDCl<sub>3</sub>, 162 MHz):** δ 31.2.

**HRMS (ESI, m/Z):** calcd. for C<sub>17</sub>H<sub>18</sub>OP [M+H]<sup>+</sup>: 269.1090, found: 269.1091.

**4-(diphenylphosphoryl)pent-4-enitrile (1u)**

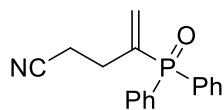

The product was synthesized following **Method A** obtained after column chromatography (SiO<sub>2</sub>, EA:Pentane = 1:1) as a white solid 83% of yield.

**<sup>1</sup>H NMR (CDCl<sub>3</sub>, 400 MHz):** δ 7.77 – 7.64 (m, 4H, CH<sub>Ar</sub>), 7.62 – 7.42 (m, 6H, CH<sub>Ar</sub>), 6.07 (d, *J* = 41.4 Hz, 1H, C=CHH), 5.58 (d, *J* = 19.7 Hz, 1H, C=CHH), 2.77 – 2.56 (m, 4H, CH<sub>2</sub>CH<sub>2</sub>).

**<sup>13</sup>C NMR (CDCl<sub>3</sub>, 101 MHz):** δ 140.5 (d, *J* = 93.3 Hz), 132.4 (d, *J* = 2.7 Hz), 131.8 (d, *J* = 9.8 Hz), 131.7 (d, *J* = 9.9 Hz), 130.4 (d, *J* = 102.8 Hz), 128.8 (d, *J* = 12.1 Hz), 118.8, 28.7 (d, *J* = 11.4 Hz), 17.2 (d, *J* = 3.9 Hz).

**<sup>31</sup>P NMR (CDCl<sub>3</sub>, 162 MHz):** δ 30.9.

**HRMS (ESI, m/Z):** calcd. for C<sub>17</sub>H<sub>17</sub>NOP [M+H]<sup>+</sup>: 282.1042, found: 282.1046.

**(1-phenylvinyl)di-p-tolylphosphine oxide (1w)**

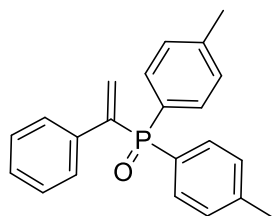

The product was synthesized following **Method A** obtained after column chromatography (SiO<sub>2</sub>, EA:Pentane = 1:1) as a white solid 70% of yield.

**<sup>1</sup>H NMR (CDCl<sub>3</sub>, 400 MHz):** δ 7.61 – 7.52 (m, 4H, CH<sub>Ar</sub>), 7.48 – 7.40 (m, 2H, CH<sub>Ar</sub>), 7.26 – 7.16 (m, 7H, CH<sub>Ar</sub>), 6.19 (d, *J* = 39.9 Hz, 1H, CHH), 5.72 (d, *J* = 19.6 Hz, 1H, CHH), 2.35 (s, 6H, 2xCH<sub>3</sub>).

**<sup>13</sup>C NMR (CDCl<sub>3</sub>, 101 MHz):** δ 144.7 (d, *J* = 92.4 Hz), 142.4 (d, *J* = 2.9 Hz), 137.8 (d, *J* = 9.9 Hz), 132.1 (d, *J* = 9.9 Hz), 131.7 (d, *J* = 9.7 Hz), 129.3 (d, *J* = 12.5 Hz), 128.5, 128.6 (d, *J* = 106.0 Hz), 128.2 (d, *J* = 4.7 Hz), 128.2 (d, *J* = 0.9 Hz), 21.7 (d, *J* = 1.4 Hz).

**<sup>31</sup>P NMR (CDCl<sub>3</sub>, 162 MHz):** δ 27.4.

**HRMS (ESI, m/Z):** calcd. for C<sub>22</sub>H<sub>22</sub>OP [M+H]<sup>+</sup>: 333.1403, found: 333.1404.

**bis(4-chlorophenyl)(1-phenylvinyl)phosphine oxide (1x)**

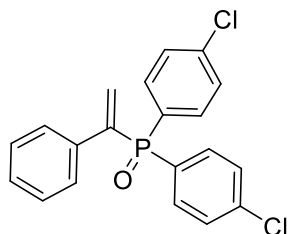

The product was synthesized following **Method A** obtained after column chromatography (SiO<sub>2</sub>, EA:Pentane = 1:1) as a white solid 54% of yield.

**<sup>1</sup>H NMR (CDCl<sub>3</sub>, 400 MHz):** δ 7.69 – 7.54 (m, 4H, CH<sub>Ar</sub>), 7.50 – 7.36 (m, 6H, CH<sub>Ar</sub>), 7.33 – 7.19 (m, 3H, CH<sub>Ar</sub>), 6.27 (d, *J* = 40.8 Hz, 1H, CHH), 5.77 (d, *J* = 20.2 Hz, 1H, CHH).



**<sup>13</sup>C NMR (CDCl<sub>3</sub>, 101 MHz):** δ 144.0 (d, *J* = 94.3 Hz), 138.9 (d, *J* = 2.8 Hz), 137.1 (d, *J* = 9.8 Hz), 133.4 (d, *J* = 10.4 Hz), 132.5 (d, *J* = 9.4 Hz), 129.9 (d, *J* = 105.2 Hz), 129.1 (d, *J* = 12.8 Hz), 128.7, 128.7, 128.2 (d, *J* = 4.7 Hz).

**<sup>31</sup>P NMR (CDCl<sub>3</sub>, 162 MHz):** δ 28.5.

**HRMS (ESI, m/z):** calcd. for C<sub>20</sub>H<sub>16</sub>Cl<sub>2</sub>OP [M+H]<sup>+</sup>: 373.0310, found: 373.0312.

**di(naphthalen-2-yl)(1-phenylvinyl)phosphine oxide (1y)**

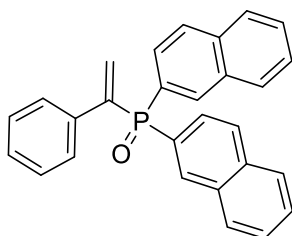

The product was synthesized following **Method A** obtained after column chromatography (SiO<sub>2</sub>, EA:Pentane = 1:1) as a white solid 50% of yield.

**<sup>1</sup>H NMR (CDCl<sub>3</sub>, 400 MHz):** δ 8.42 (d, *J* = 13.6 Hz, 2H), 7.92 – 7.82 (m, 6H), 7.75 – 7.67 (m, 2H), 7.62 – 7.48 (m, 6H), 7.27 – 7.21 (m, 3H), 6.32 (dd, *J* = 40.4, 0.8 Hz, 1H), 5.87 (dd, *J* = 19.9, 0.8 Hz, 1H).

**<sup>13</sup>C NMR (CDCl<sub>3</sub>, 101 MHz):** δ 144.5 (d, *J* = 92.7 Hz), 137.7 (d, *J* = 9.9 Hz), 134.8 (d, *J* = 2.3 Hz), 134.2 (d, *J* = 9.0 Hz), 132.6 (d, *J* = 13.4 Hz), 132.3 (d, *J* = 9.9 Hz), 129.1, 129.0 (d, *J* = 103.8 Hz), 128.6, 128.4, 128.4, 128.3, 128.3, 128.2 (d, *J* = 3.3 Hz), 127.0 (d, *J* = 0.7 Hz), 126.9 (d, *J* = 10.5 Hz).

**<sup>31</sup>P NMR (CDCl<sub>3</sub>, 162 MHz):** δ 27.0.

**HRMS (ESI, m/z):** calcd. for C<sub>28</sub>H<sub>22</sub>OP [M+H]<sup>+</sup>: 405.1403, found: 405.1402.

## 6. References

- (1) W. J. Yue, J. Z. Xiao, S. Zhang and L. Yin, *Angew. Chem., Int. Ed.* 2020, **59**, 7057–7062.
- (2) Y.-B. Li, H. Tian and L. Yin, *J. Am. Chem. Soc.* 2020, **142**, 20098–20106.
- (3) N. Dobashi, K. Fuse, T. Hoshino, J. Kanada, T. Kashiwabara, C. Kobata, S. K. Nune and M. Tanaka, *Tetrahedron Lett.* 2007, **48**, 4669–4673.
- (4) T. Chen, C. Q. Zhao and L. B. Han, *J. Am. Chem. Soc.* 2018, **140**, 3139–3155.
- (5) V. Hornillos, C. Vila, E. Otten and B. L. Feringa, *Angew. Chem., Int. Ed.* 2015, **54**, 7867–7871.
- (6) Y.-B. Huang, Y.-X. Li, P.-H. Leung and T. Hayashi, *J. Am. Chem. Soc.* 2014, **136**, 4865–4868

## 7. NMR spectra

### <sup>1</sup>H NMR (CDCl<sub>3</sub>, 400 MHz) Spectrum of 3aa

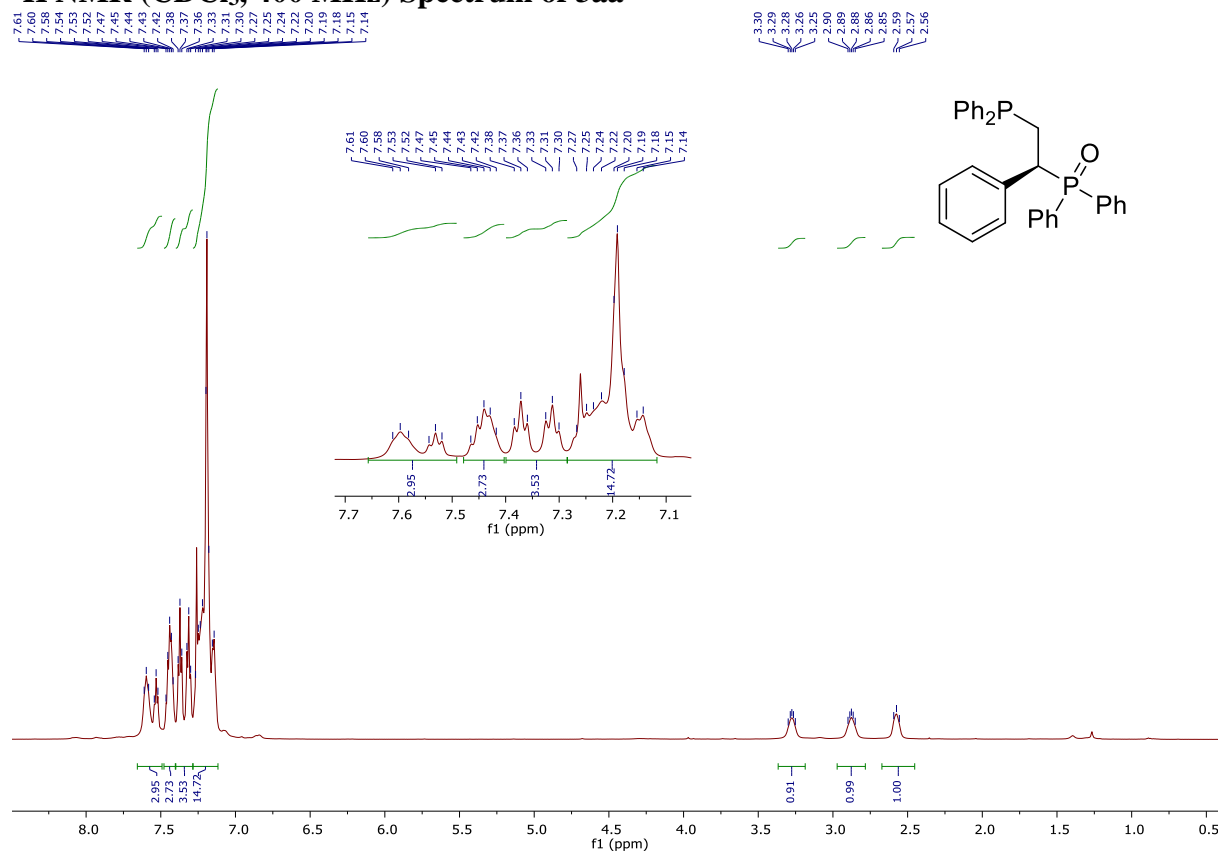

### <sup>13</sup>C NMR (CDCl<sub>3</sub>, 101 MHz) Spectrum of 3aa

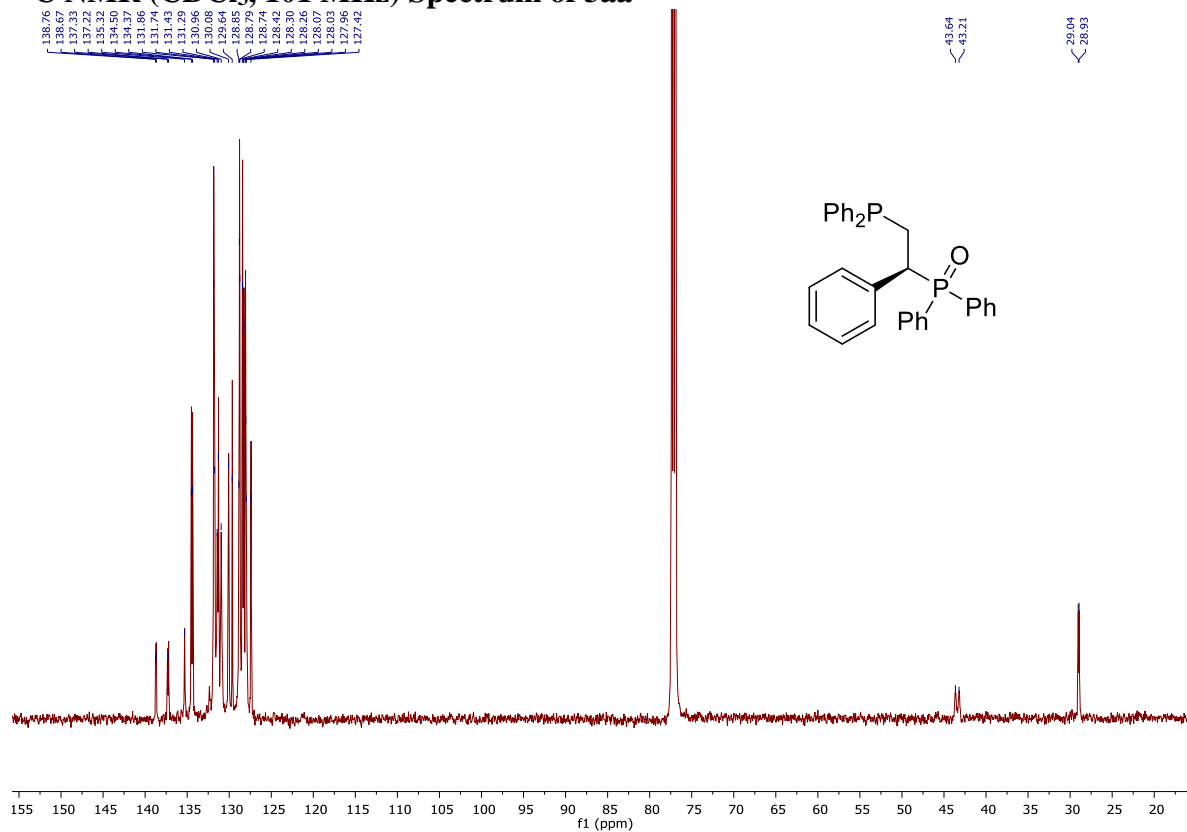

### <sup>13</sup>P NMR (CDCl<sub>3</sub>, 162 MHz) Spectrum of 3aa

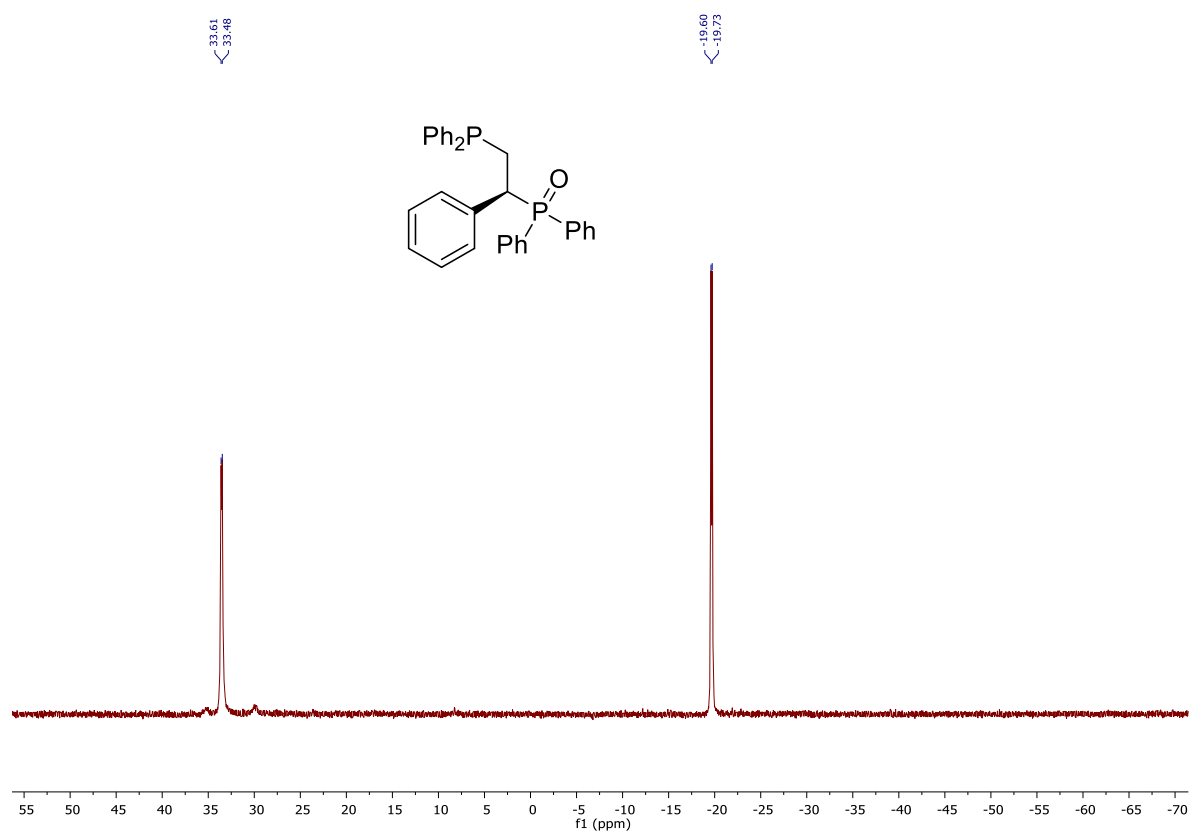

### <sup>1</sup>H NMR (CDCl<sub>3</sub>, 400 MHz) Spectrum of 3ba

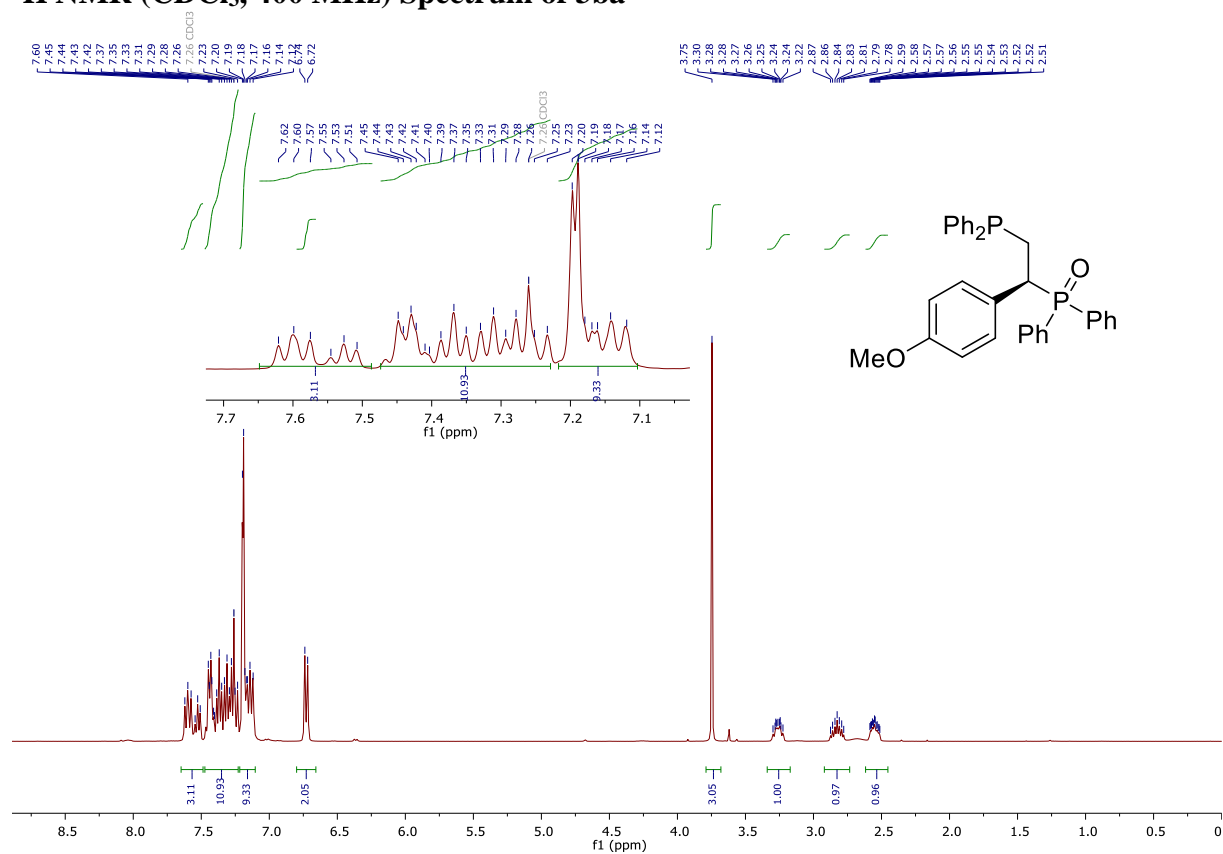



# <sup>1</sup>H NMR (CDCl<sub>3</sub>, 400 MHz) Spectrum of 3a

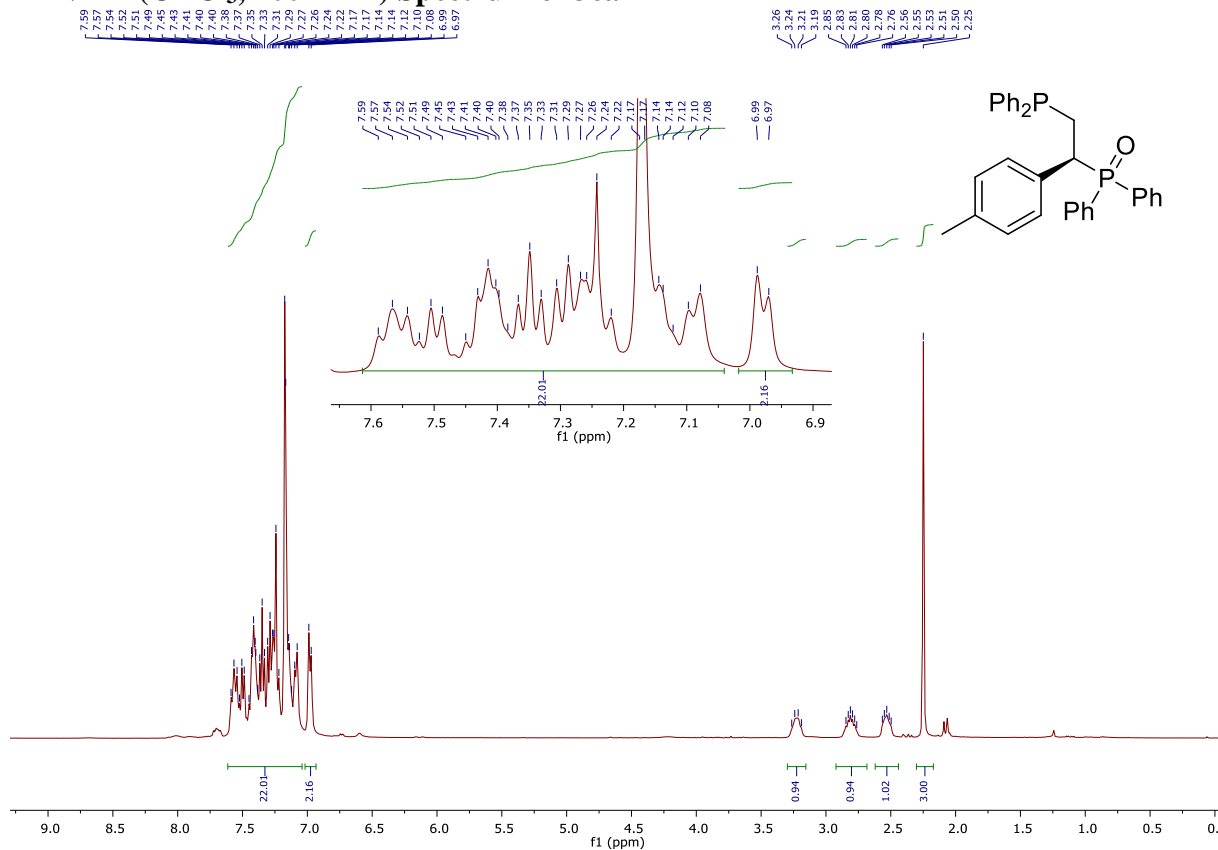

# <sup>13</sup>C NMR (CDCl<sub>3</sub>, 101 MHz) Spectrum of 3a

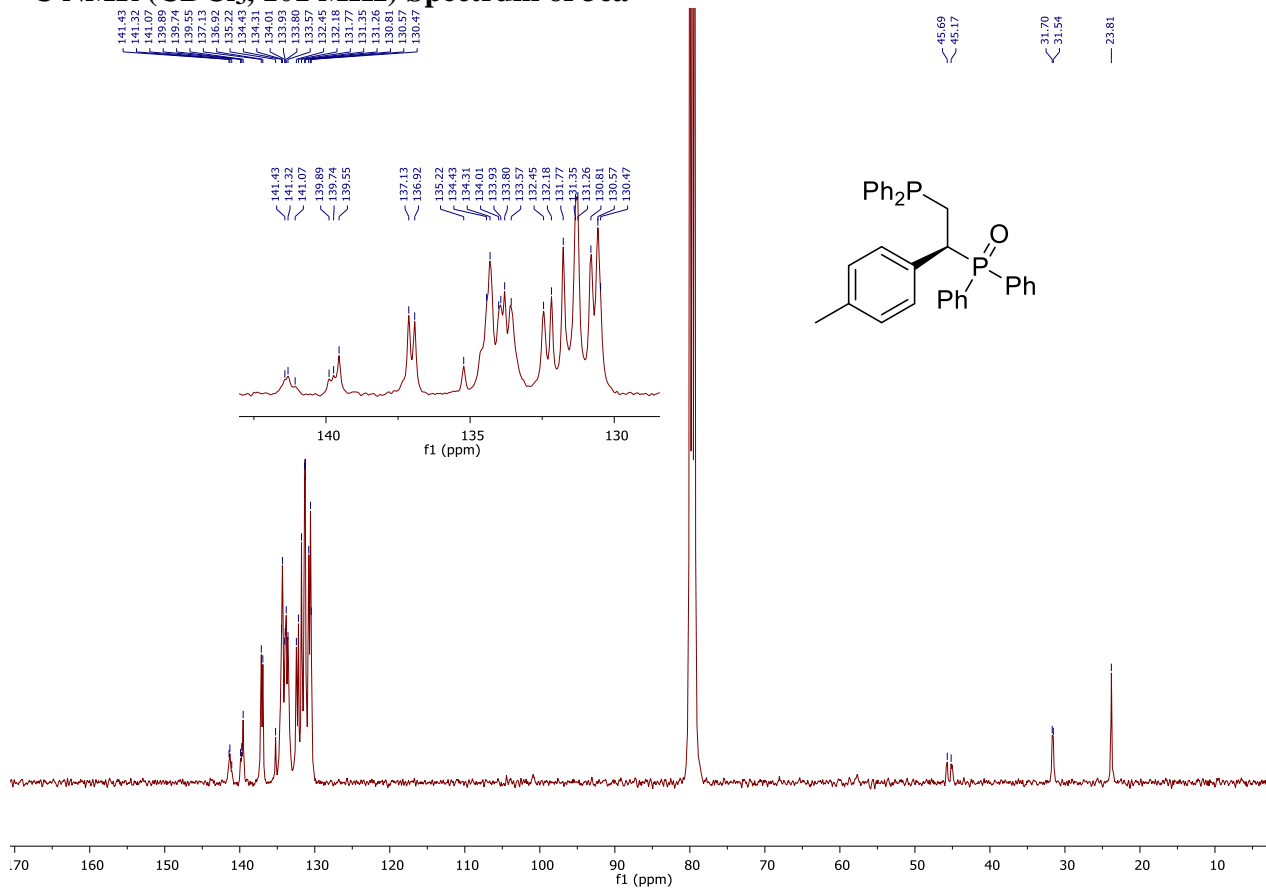

### <sup>31</sup>P NMR (CDCl<sub>3</sub>, 162 MHz) Spectrum of 3ca

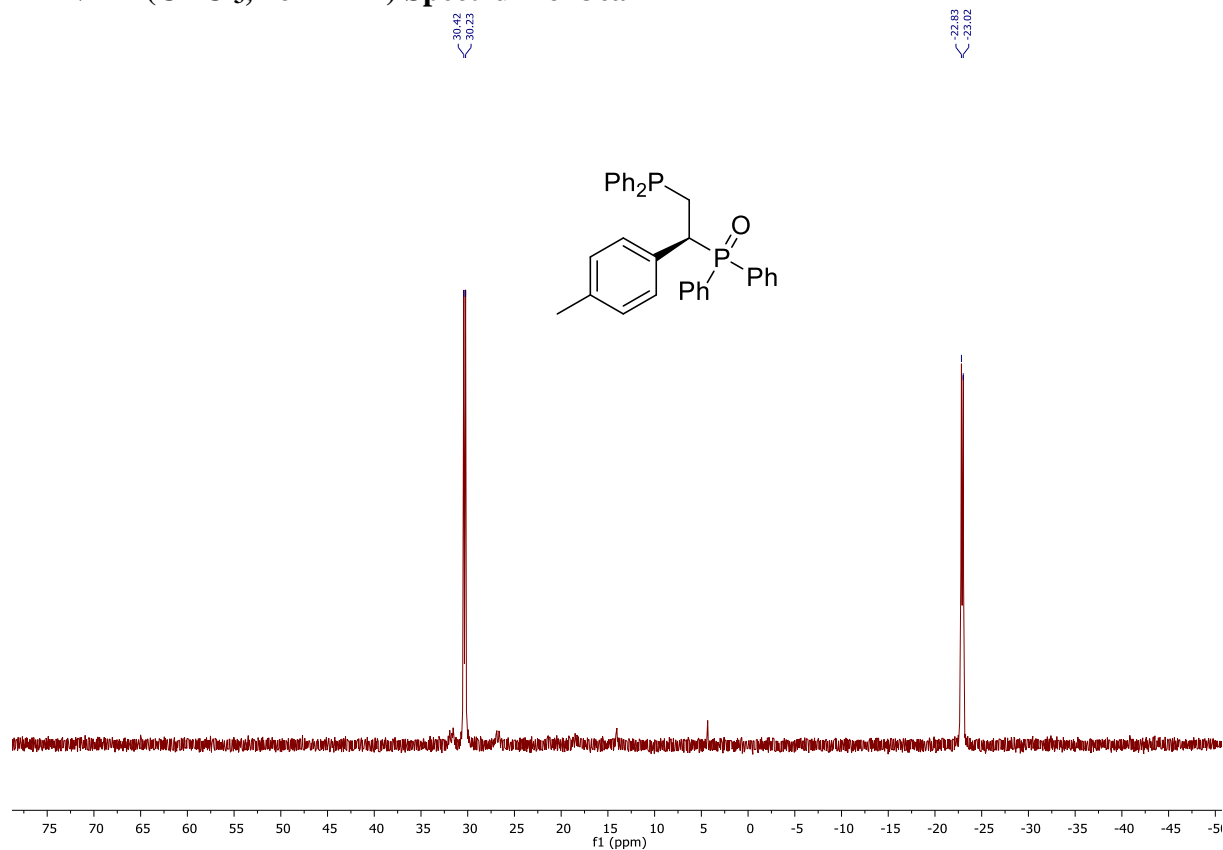

### <sup>1</sup>H NMR (CDCl<sub>3</sub>, 400 MHz) Spectrum of 3da

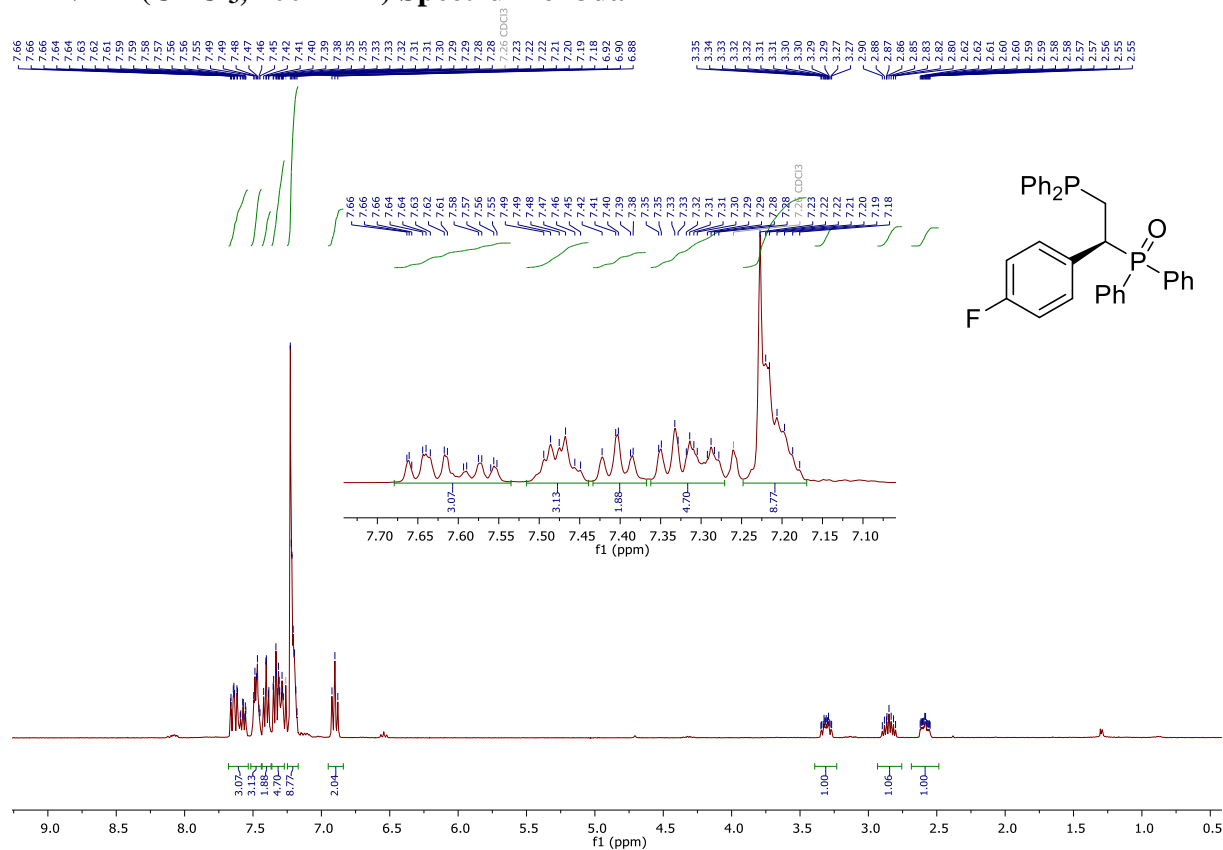

### <sup>13</sup>C NMR (CDCl<sub>3</sub>, 101 MHz) Spectrum of 3da

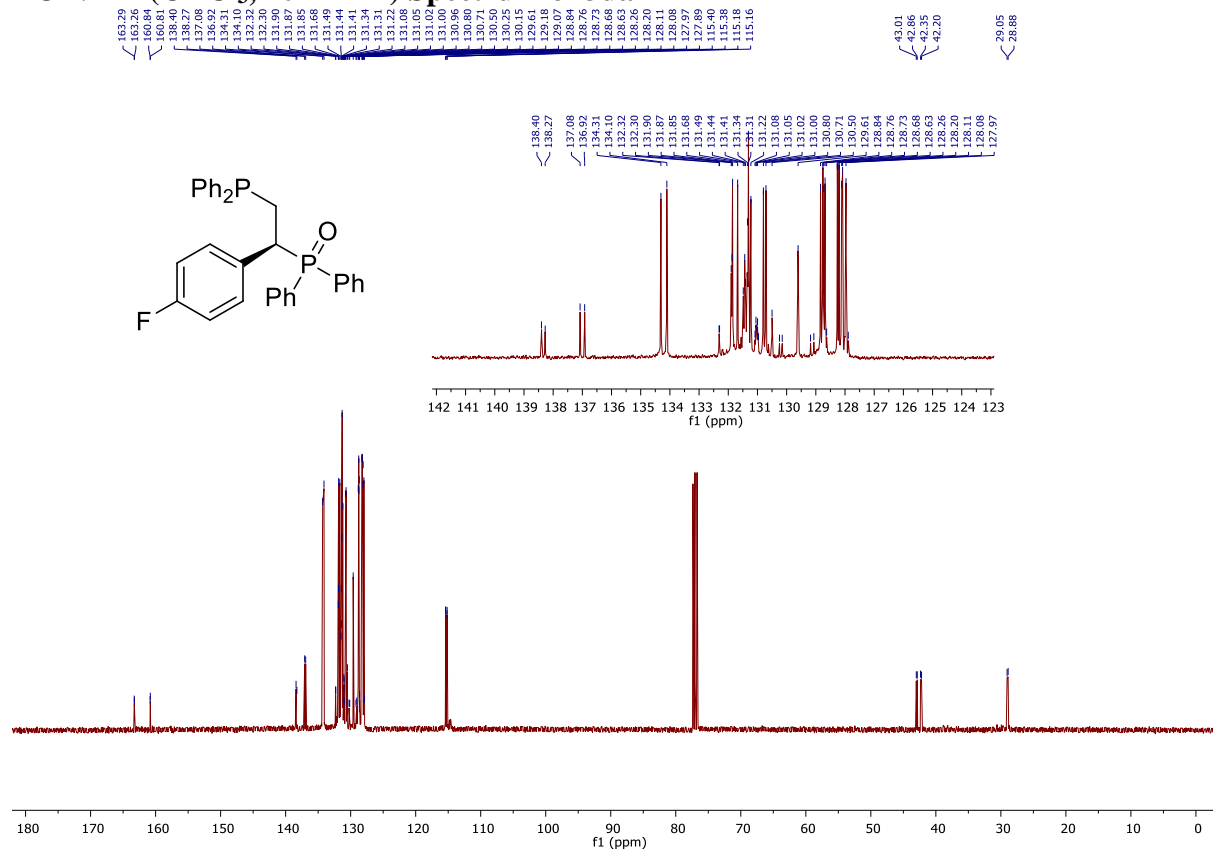

### <sup>31</sup>P NMR (CDCl<sub>3</sub>, 162 MHz) Spectrum of 3da

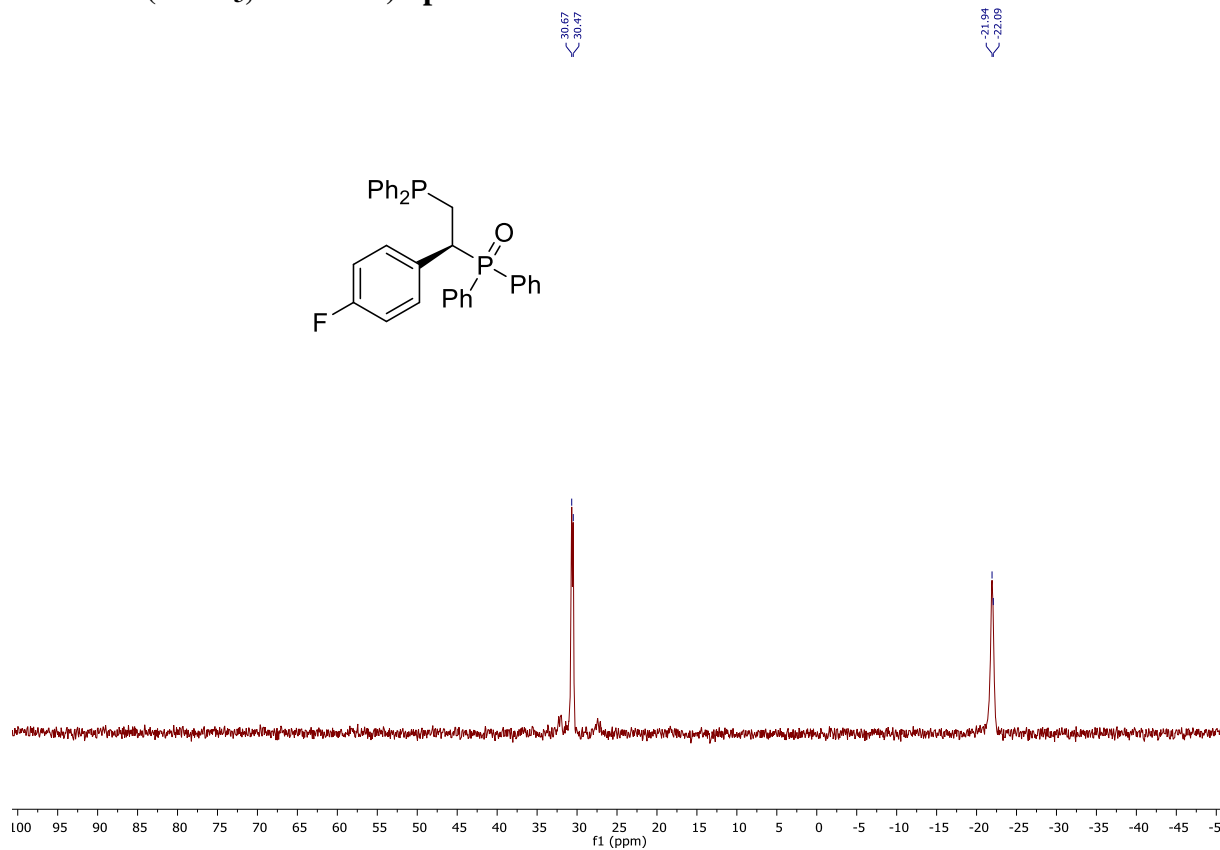

### <sup>19</sup>F NMR (CDCl<sub>3</sub>, 376 MHz) Spectrum of 3da



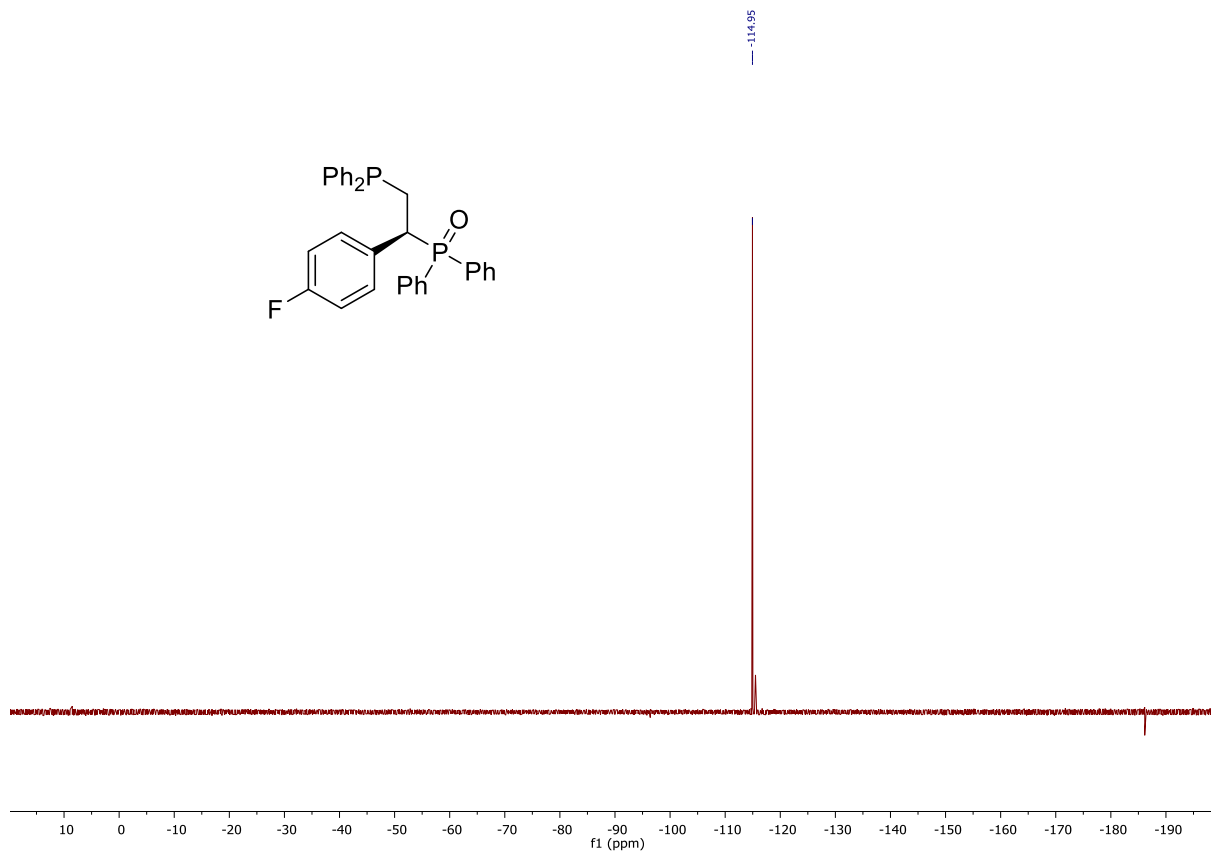

### <sup>1</sup>H NMR (CDCl<sub>3</sub>, 400 MHz) Spectrum of 3ea

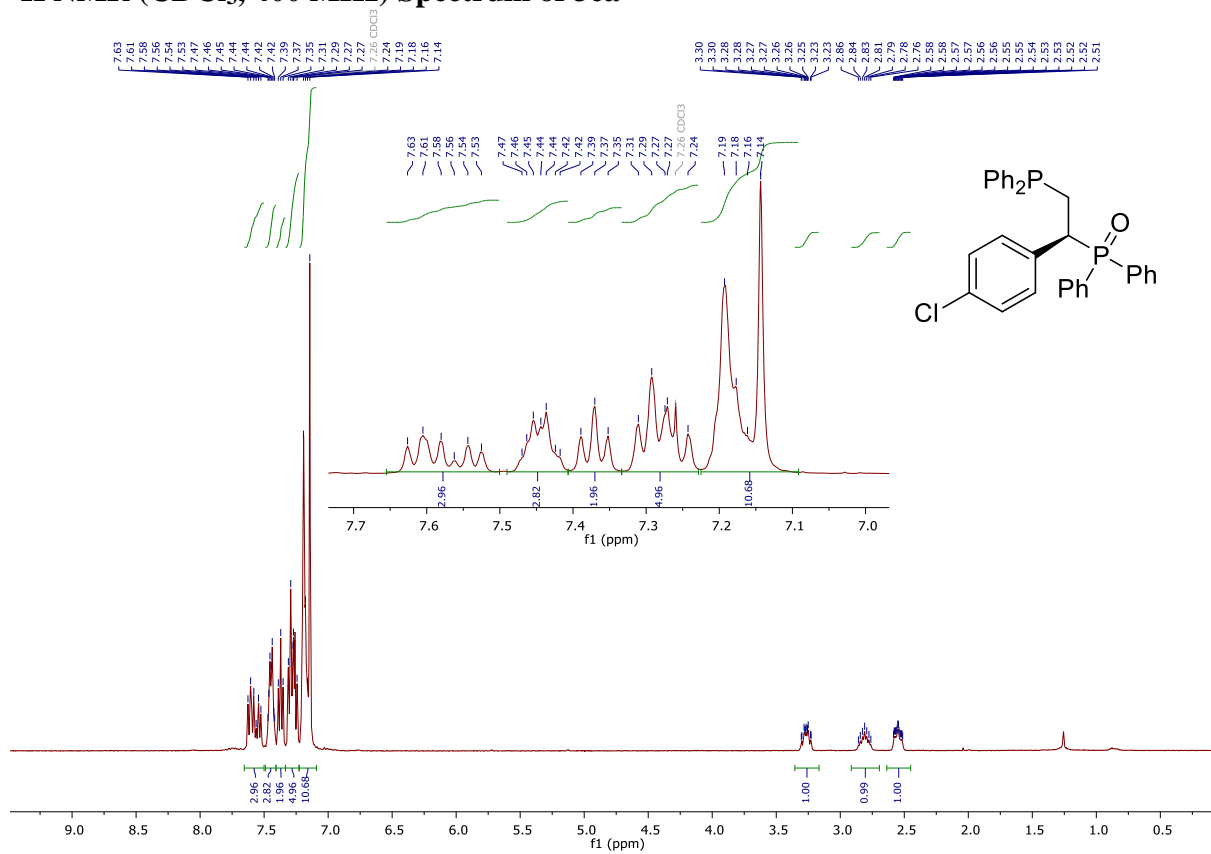

### <sup>13</sup>C NMR (CDCl<sub>3</sub>, 101 MHz) Spectrum of 3ea

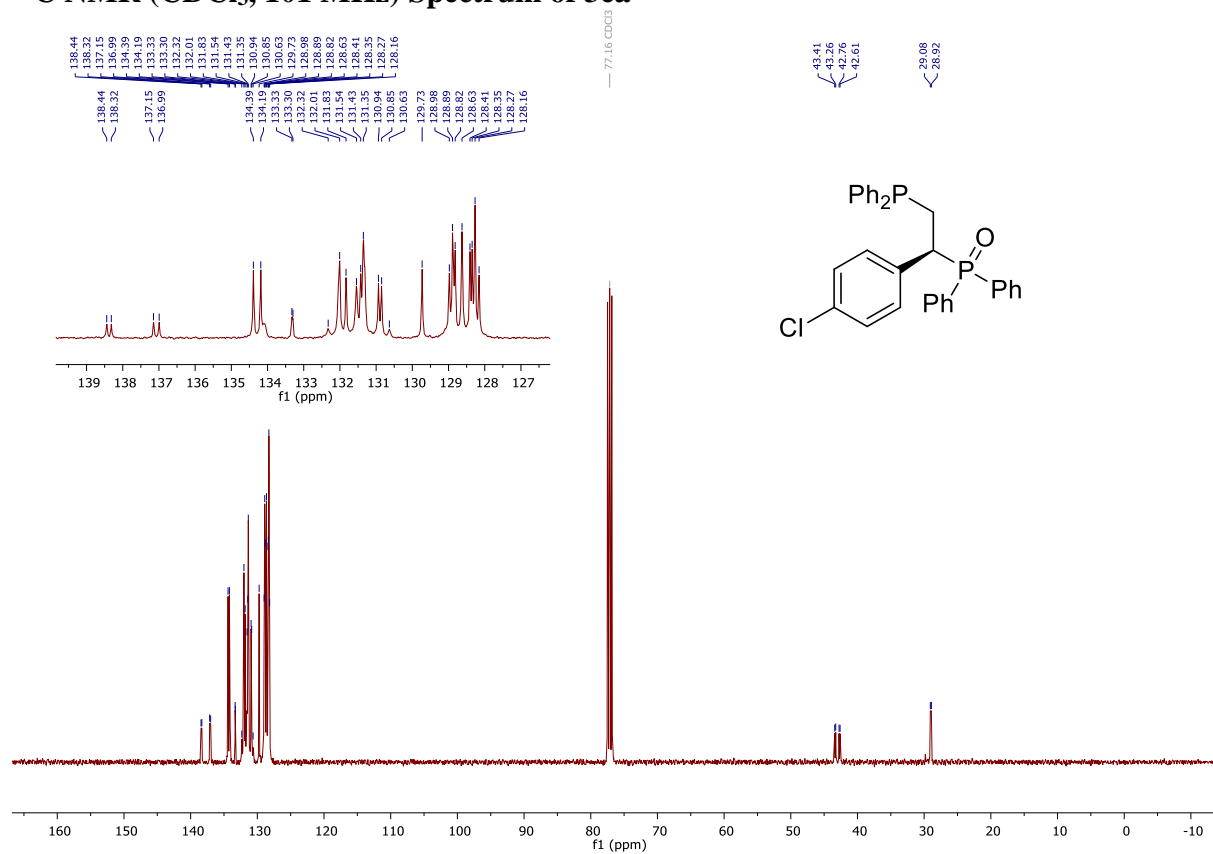

### <sup>31</sup>P NMR (CDCl<sub>3</sub>, 162 MHz) Spectrum of 3ea

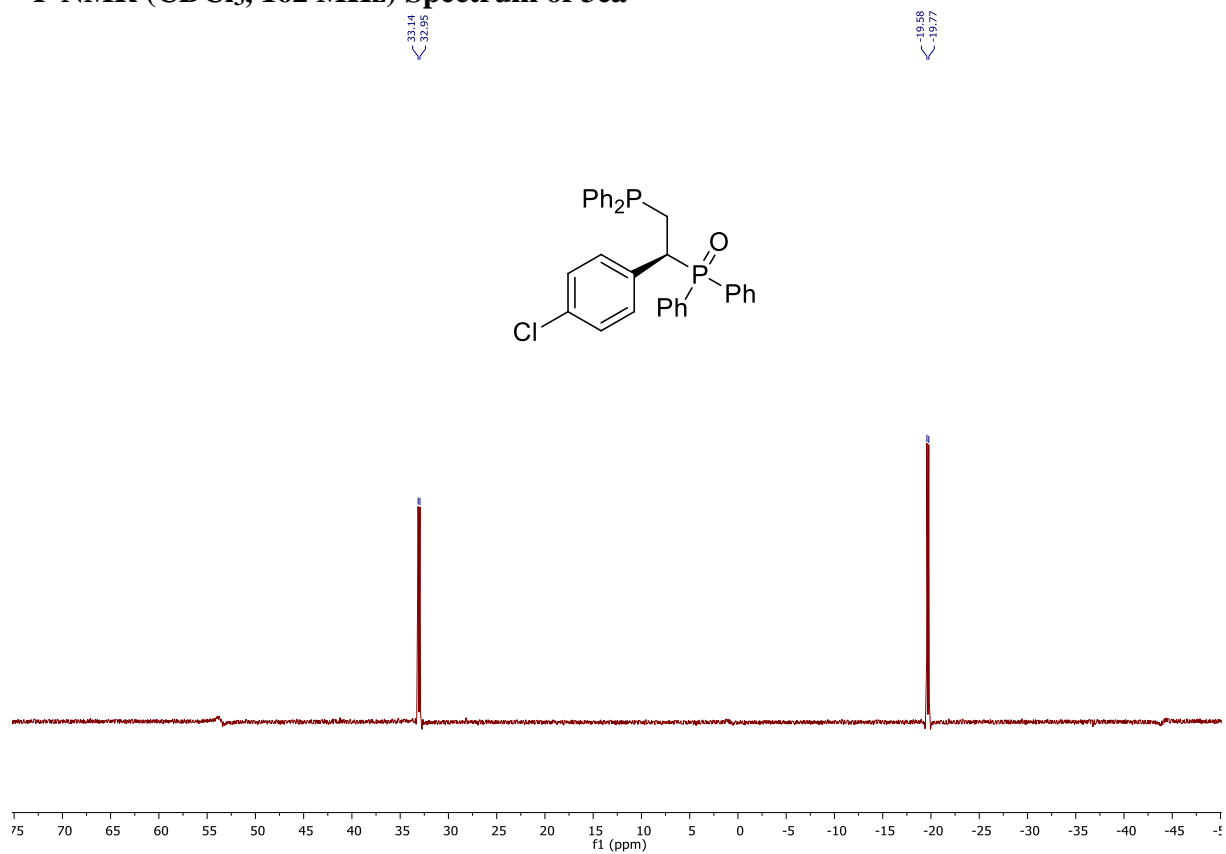

# <sup>1</sup>H NMR (CDCl<sub>3</sub>, 400 MHz) Spectrum of 3fa

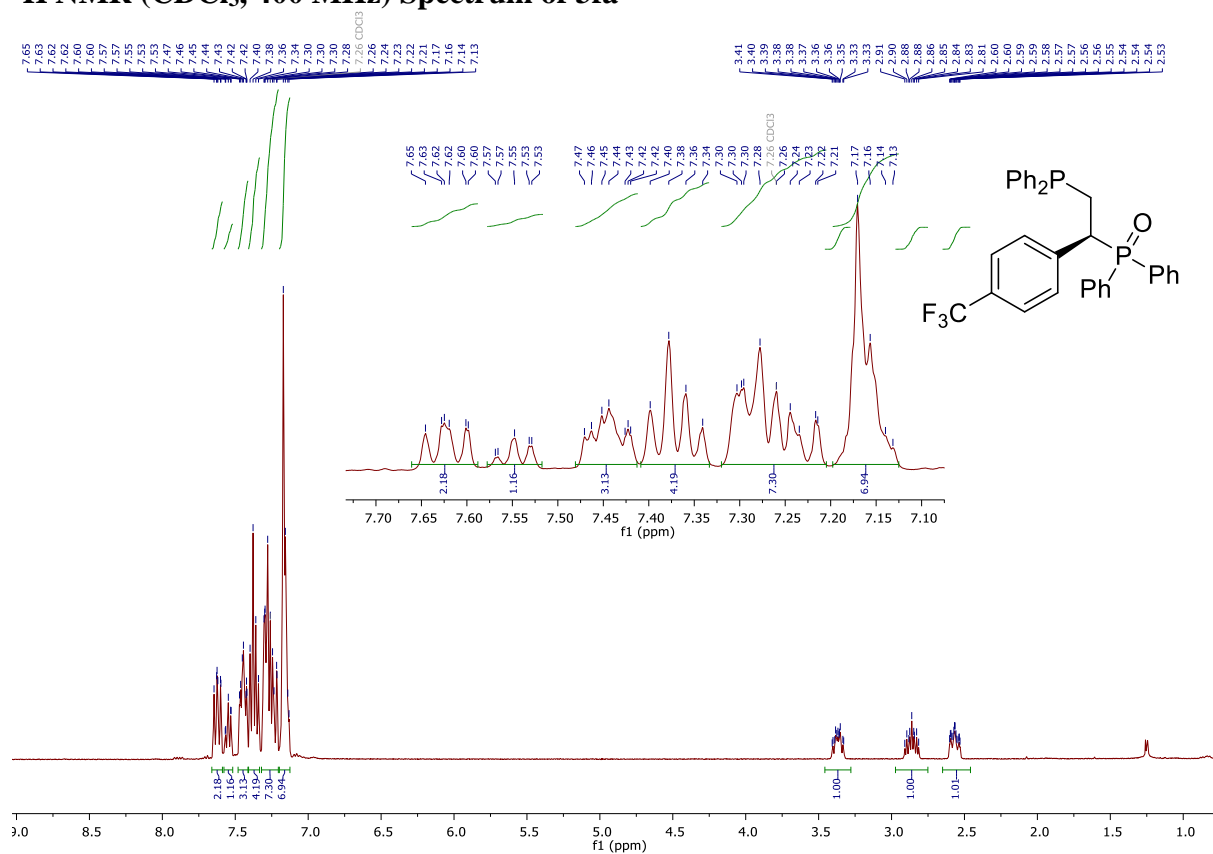

# <sup>13</sup>C NMR (CDCl<sub>3</sub>, 101 MHz) Spectrum of 3fa

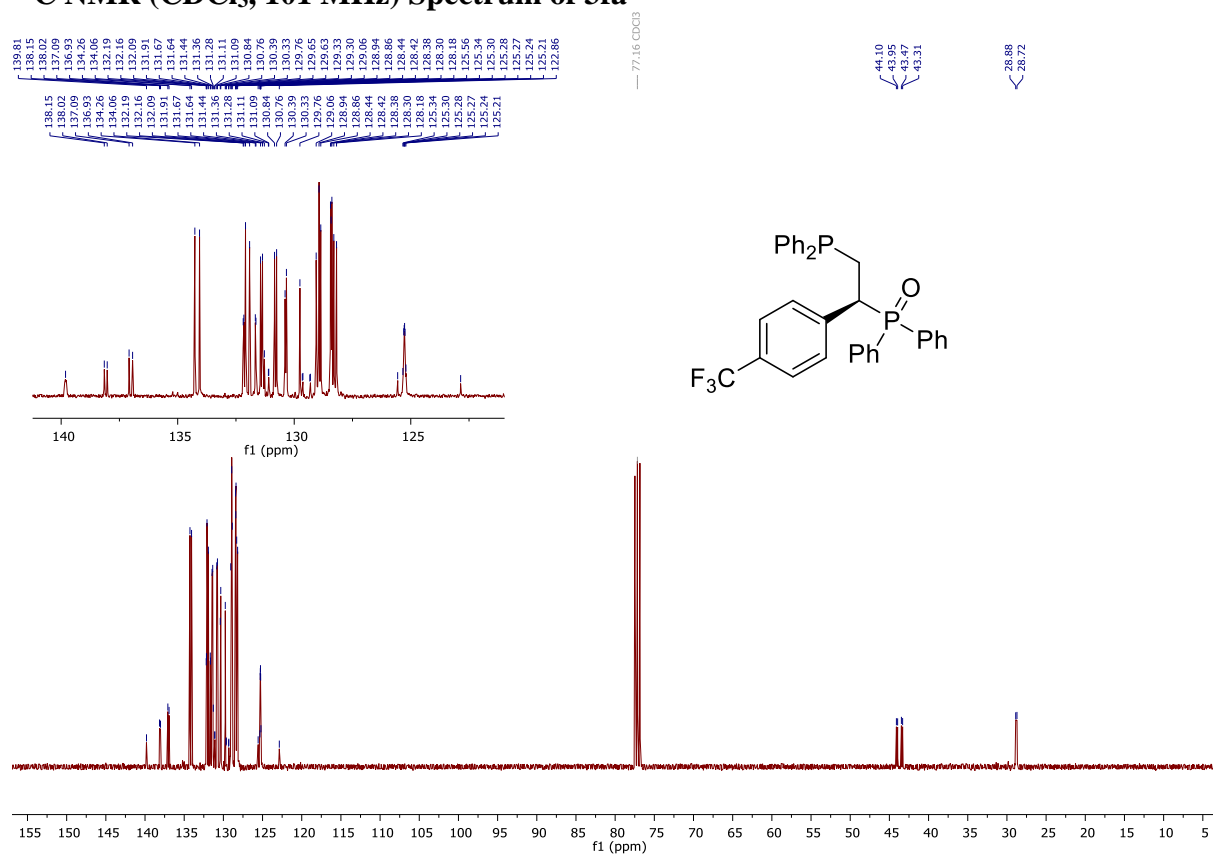

### $^{31}\text{P}$ NMR ( $\text{CDCl}_3$ , 162 MHz) Spectrum of 3fa

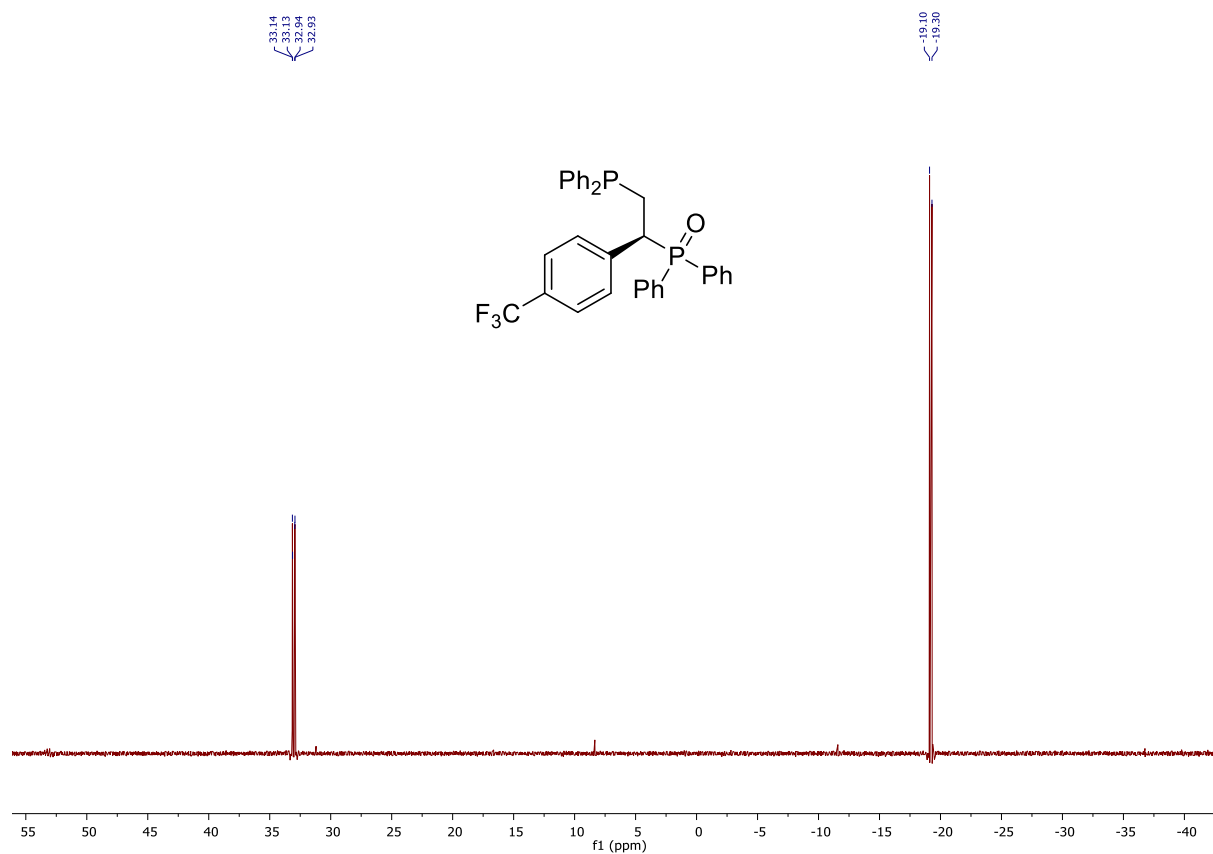

### $^{19}\text{F}$ NMR ( $\text{CDCl}_3$ , 376 MHz) Spectrum of 3fa

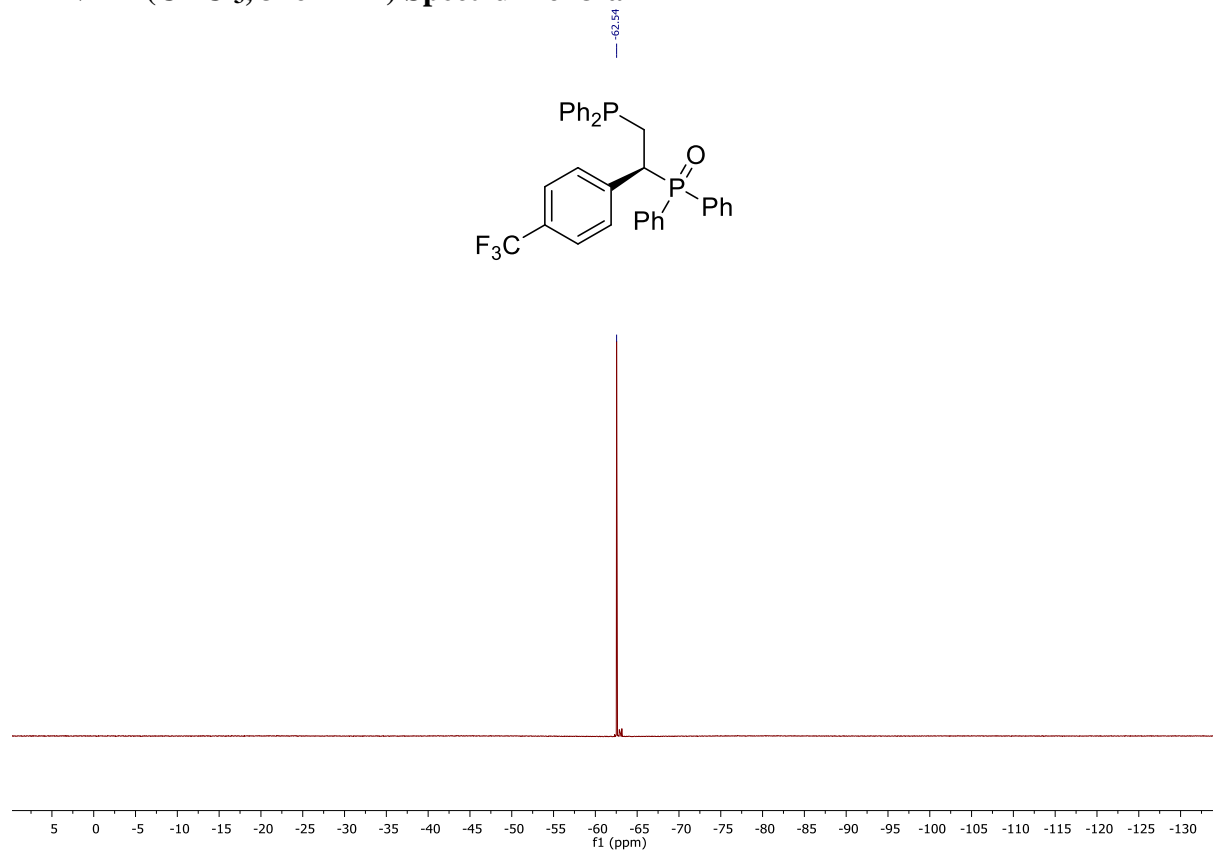

# <sup>1</sup>H NMR (CDCl<sub>3</sub>, 400 MHz) Spectrum of 3ga

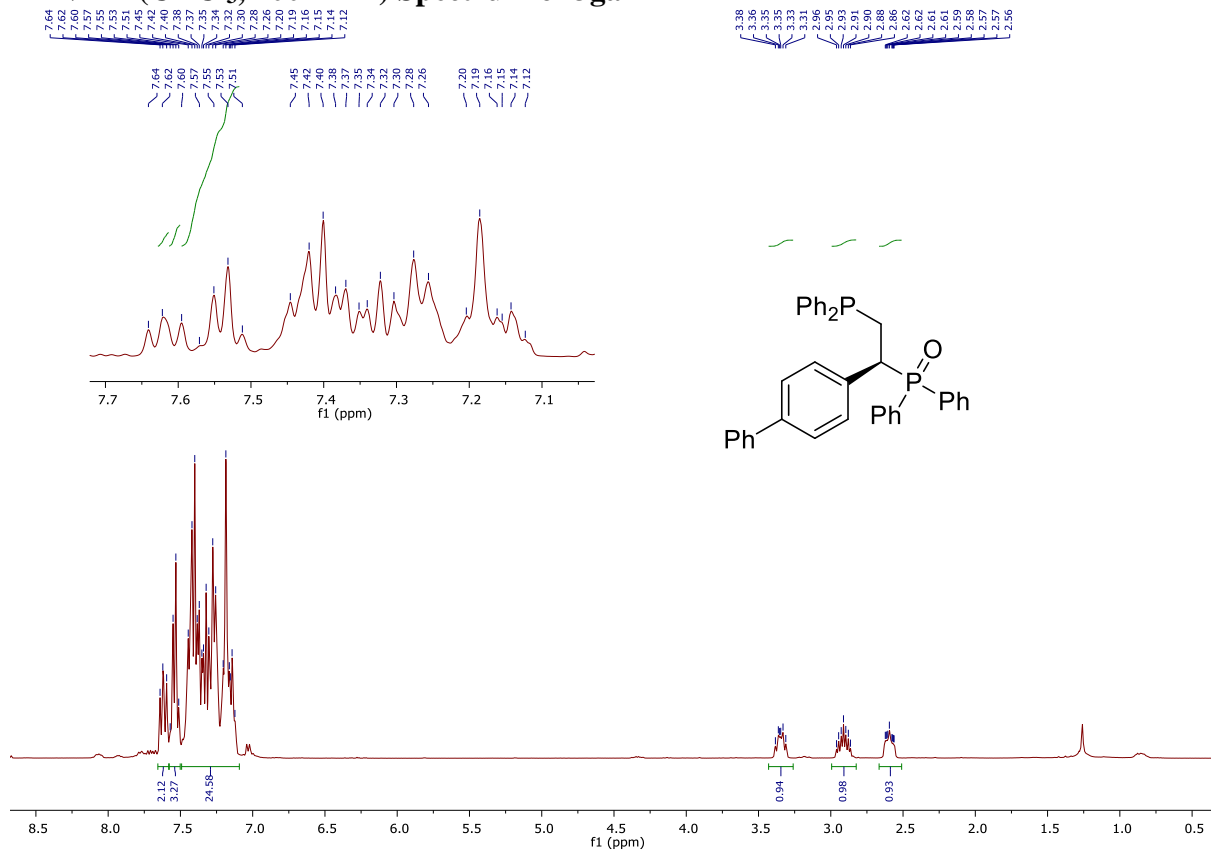

# <sup>13</sup>C NMR (CDCl<sub>3</sub>, 101 MHz) Spectrum of 3ga

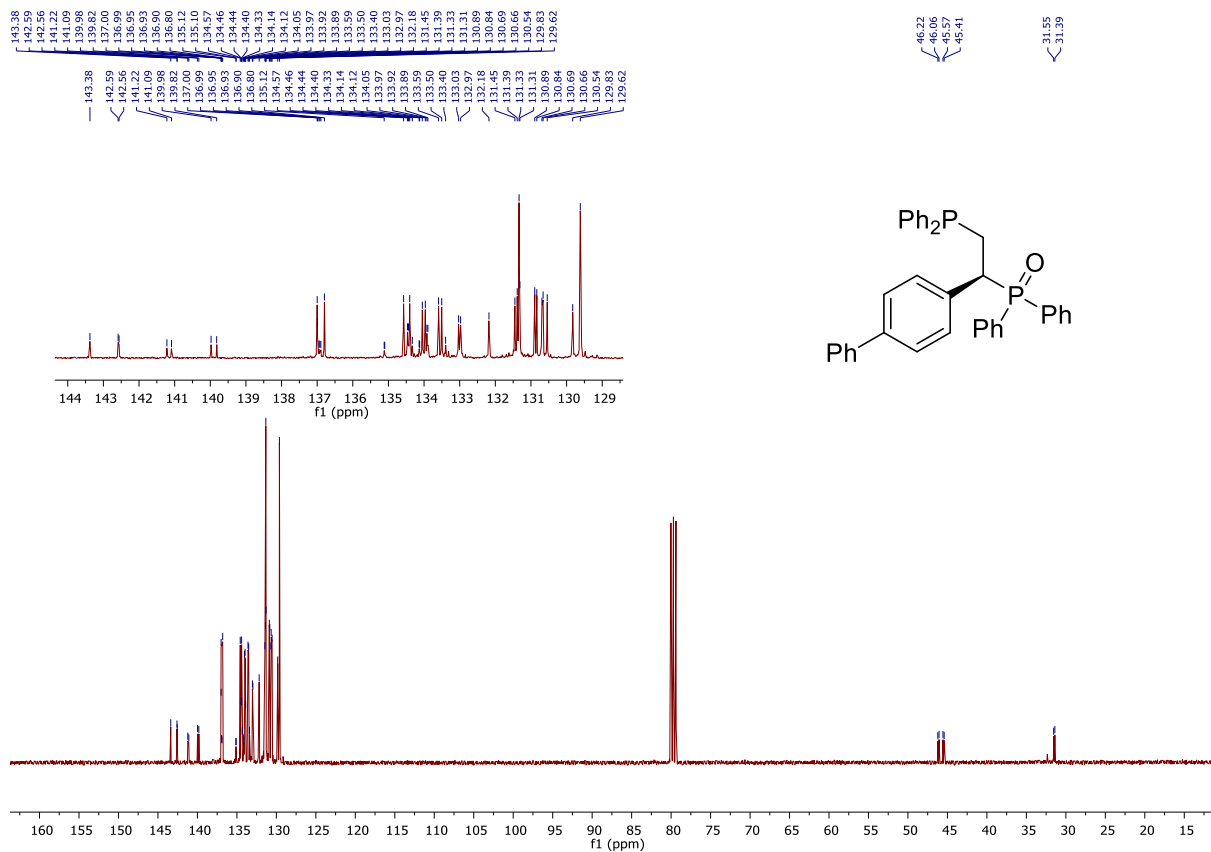

### $^{31}\text{P}$ NMR ( $\text{CDCl}_3$ , 162 MHz) Spectrum of 3ga

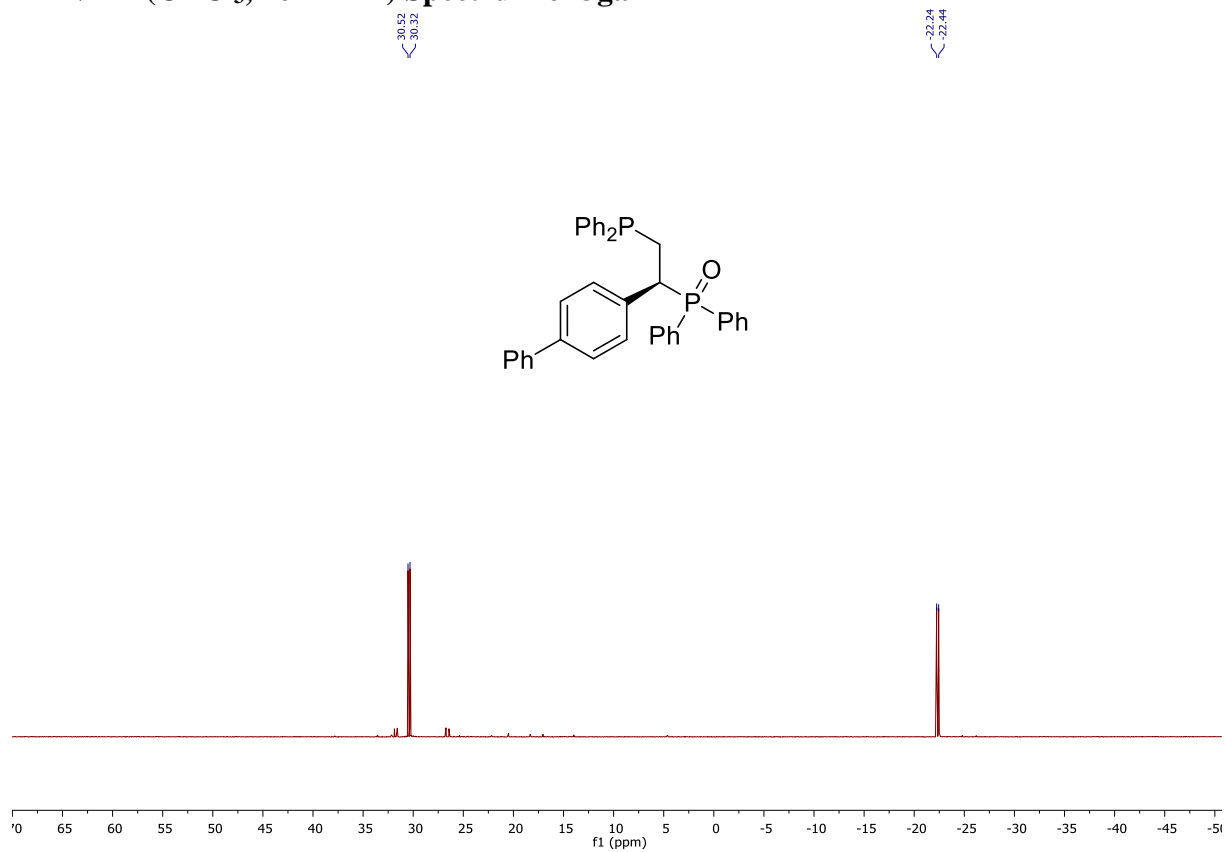

### $^1\text{H}$ NMR ( $\text{CDCl}_3$ , 400 MHz) Spectrum of 3ha

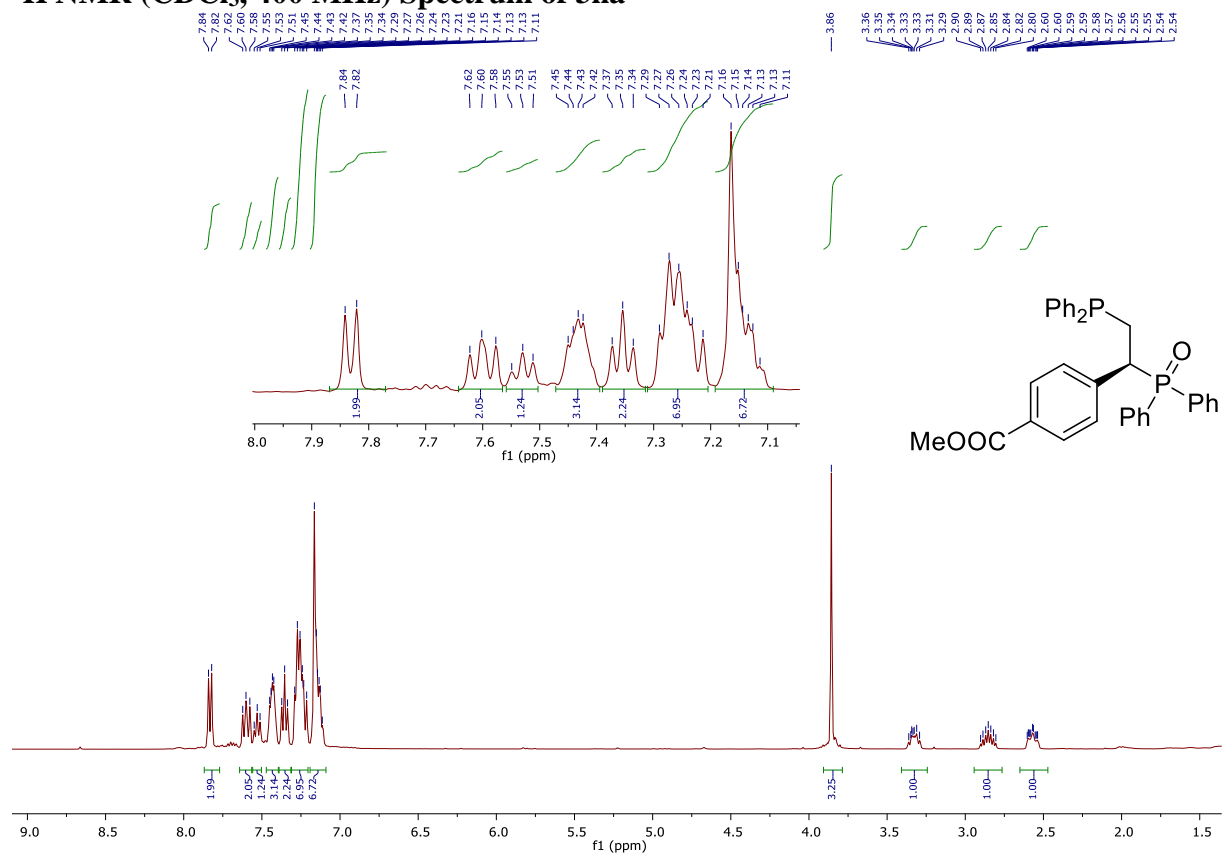

### <sup>13</sup>C NMR (CDCl<sub>3</sub>, 101 MHz) Spectrum of 3ha

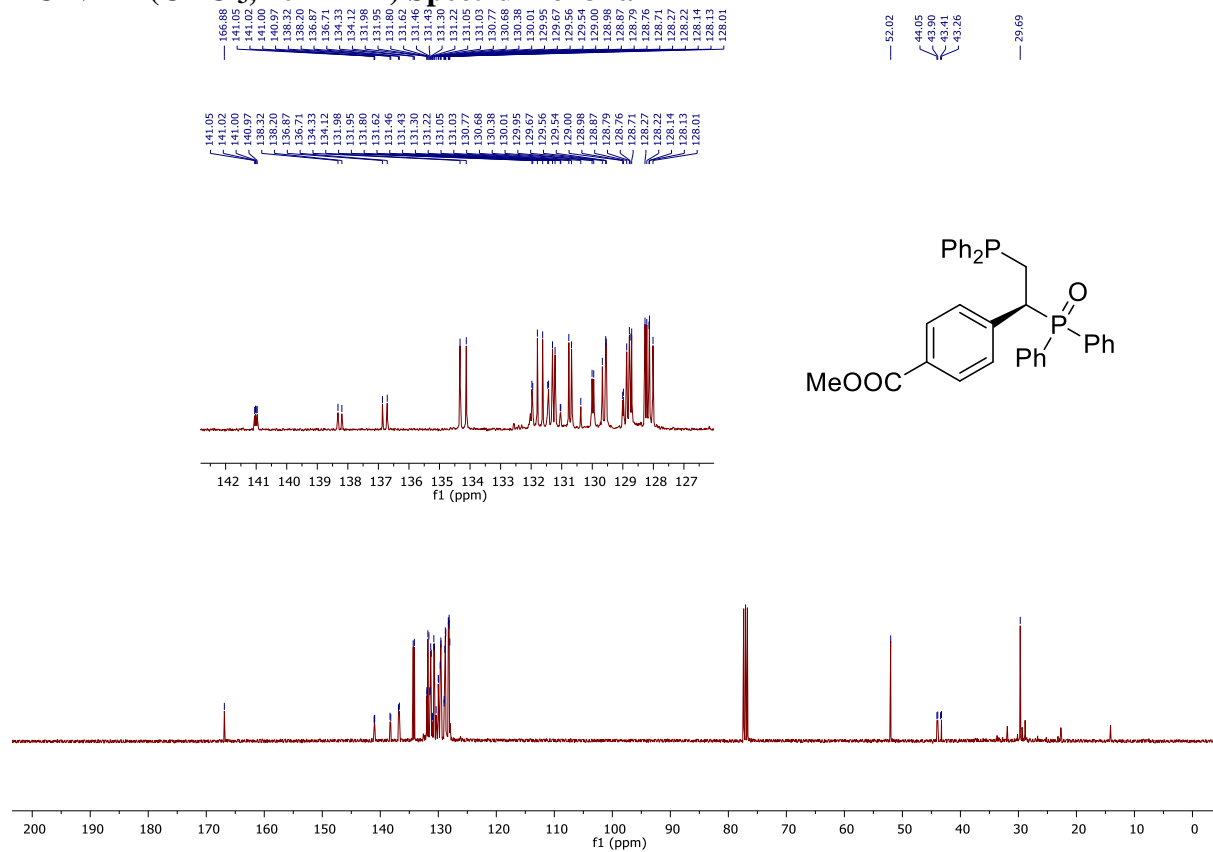

### <sup>31</sup>P NMR (CDCl<sub>3</sub>, 162 MHz) Spectrum of 3ha

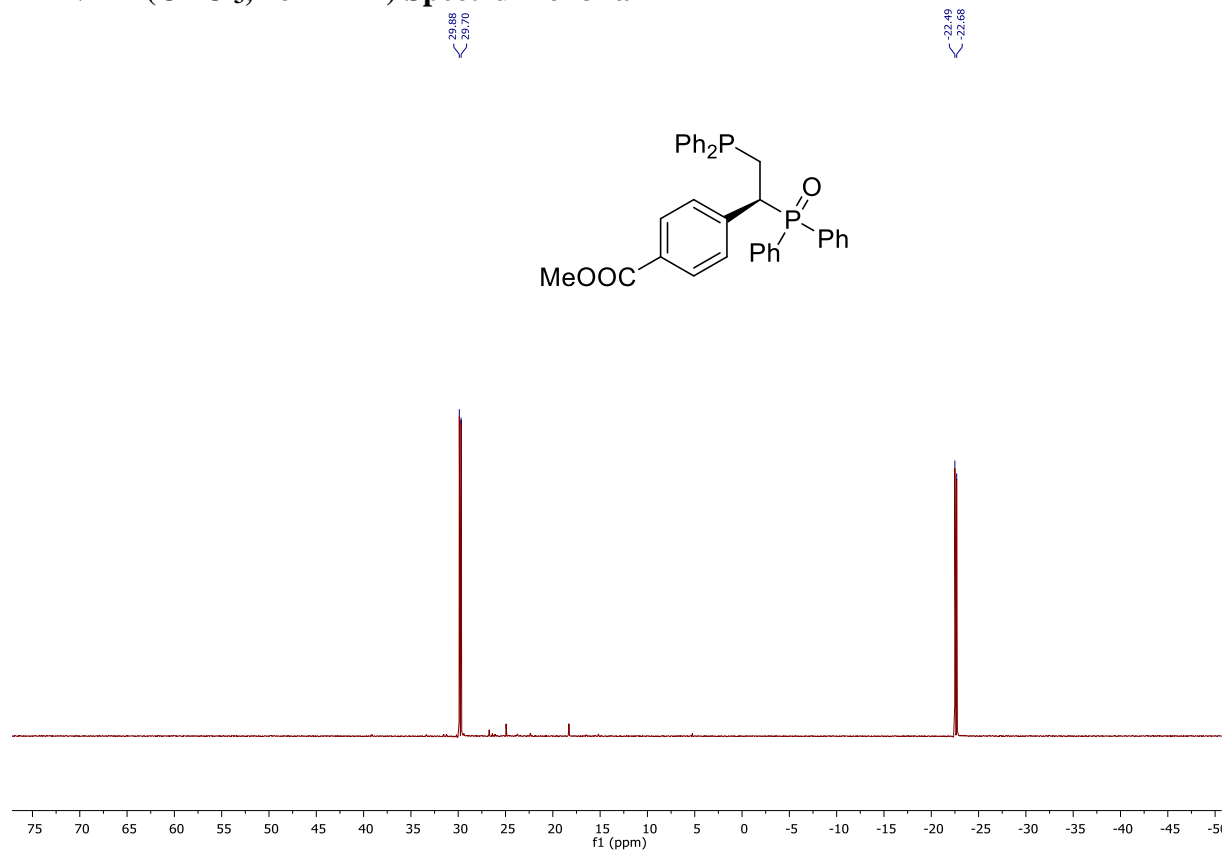

### <sup>1</sup>H NMR (CDCl<sub>3</sub>, 400 MHz) Spectrum of 3ia

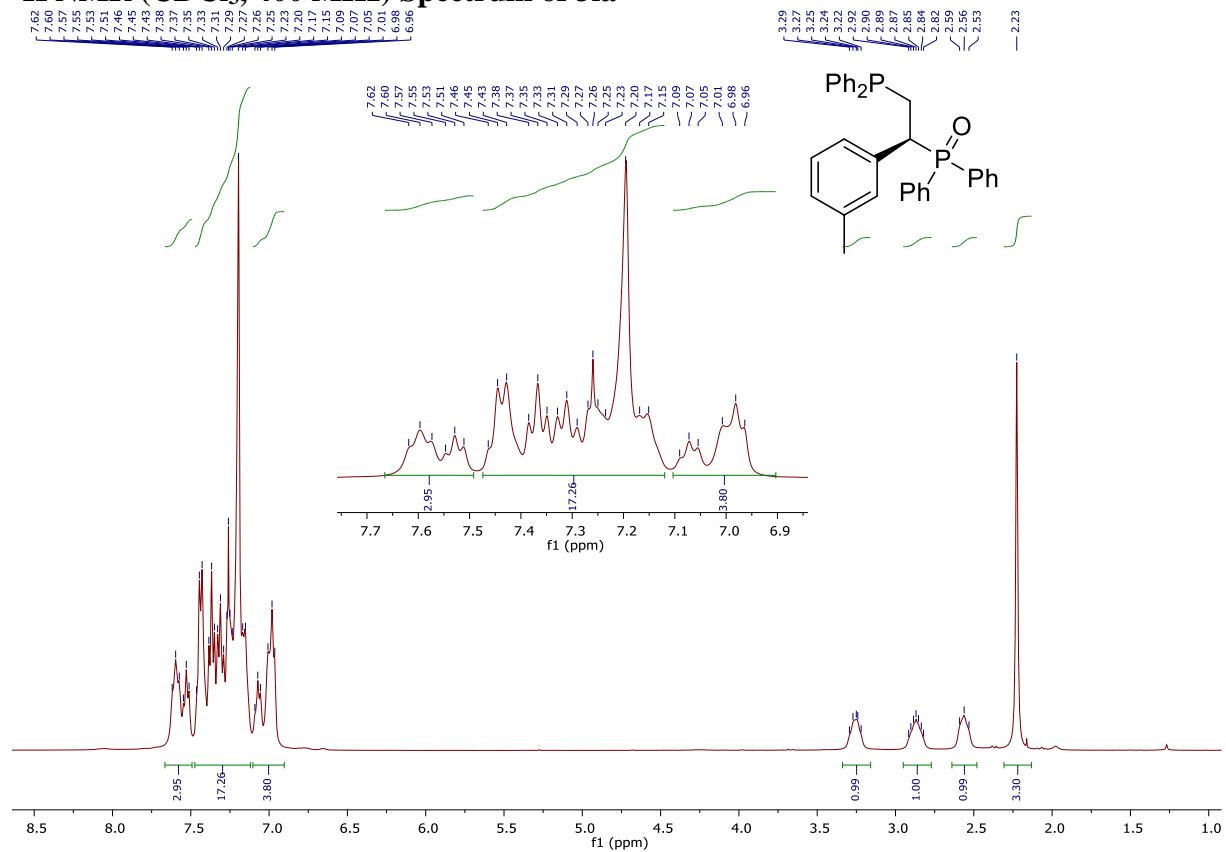

### <sup>13</sup>C NMR (CDCl<sub>3</sub>, 101 MHz) Spectrum of 3ia

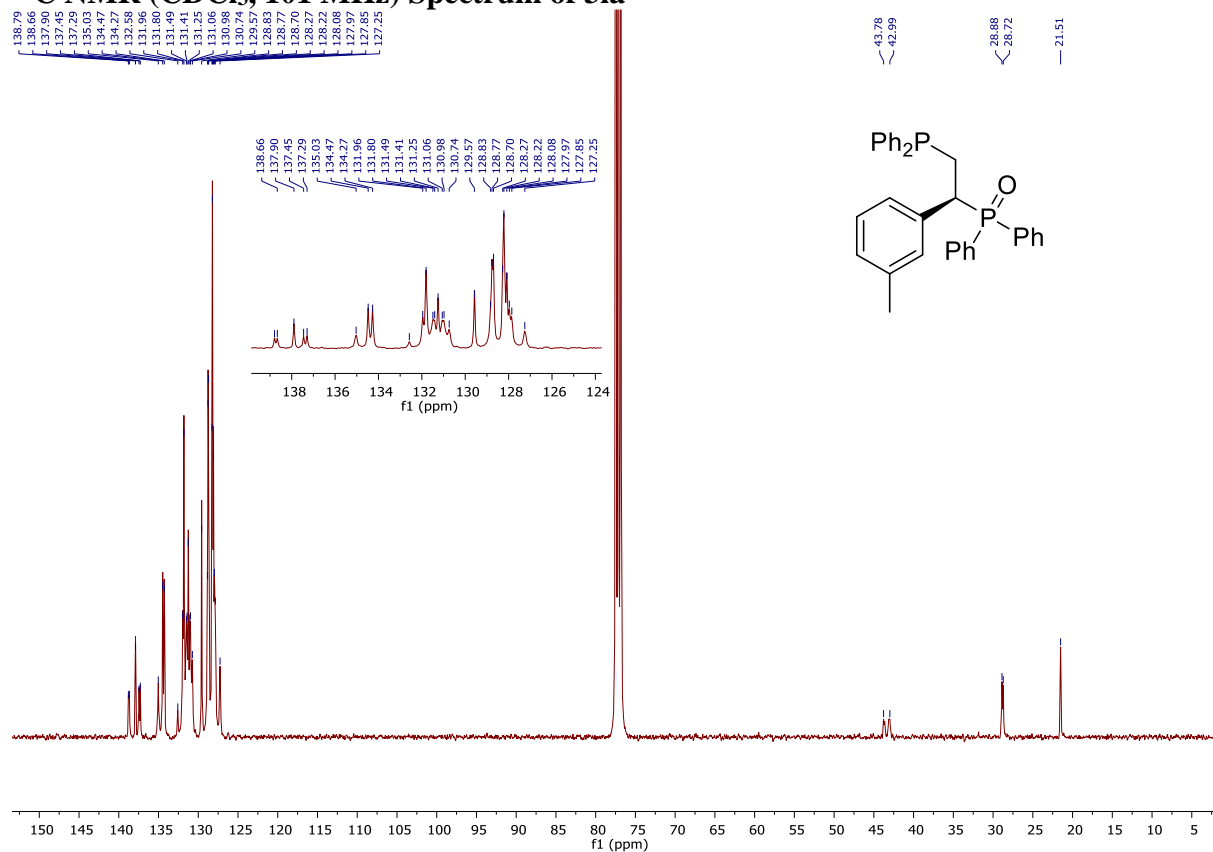



### $^{31}\text{P}$ NMR ( $\text{CDCl}_3$ , 162 MHz) Spectrum of 3ia

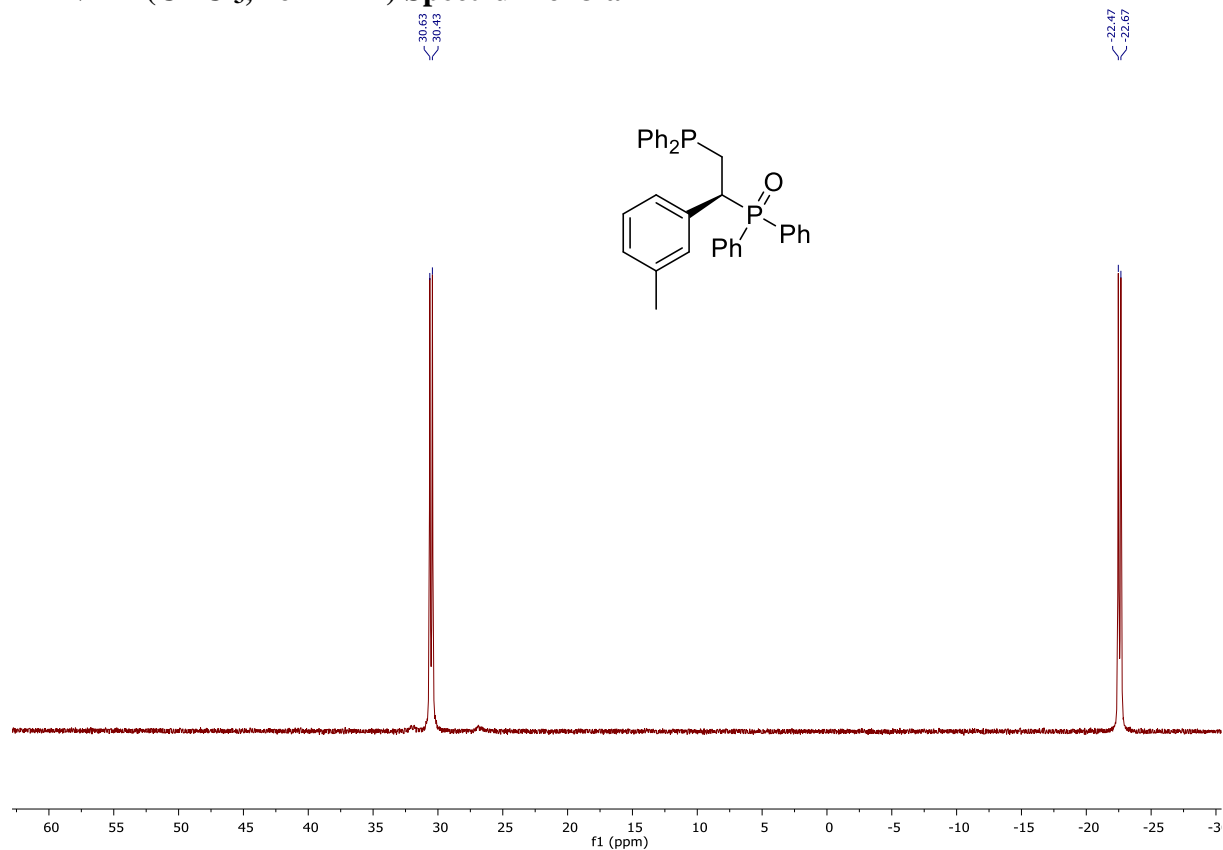

### $^1\text{H}$ NMR ( $\text{CDCl}_3$ , 400 MHz) Spectrum of 3ja

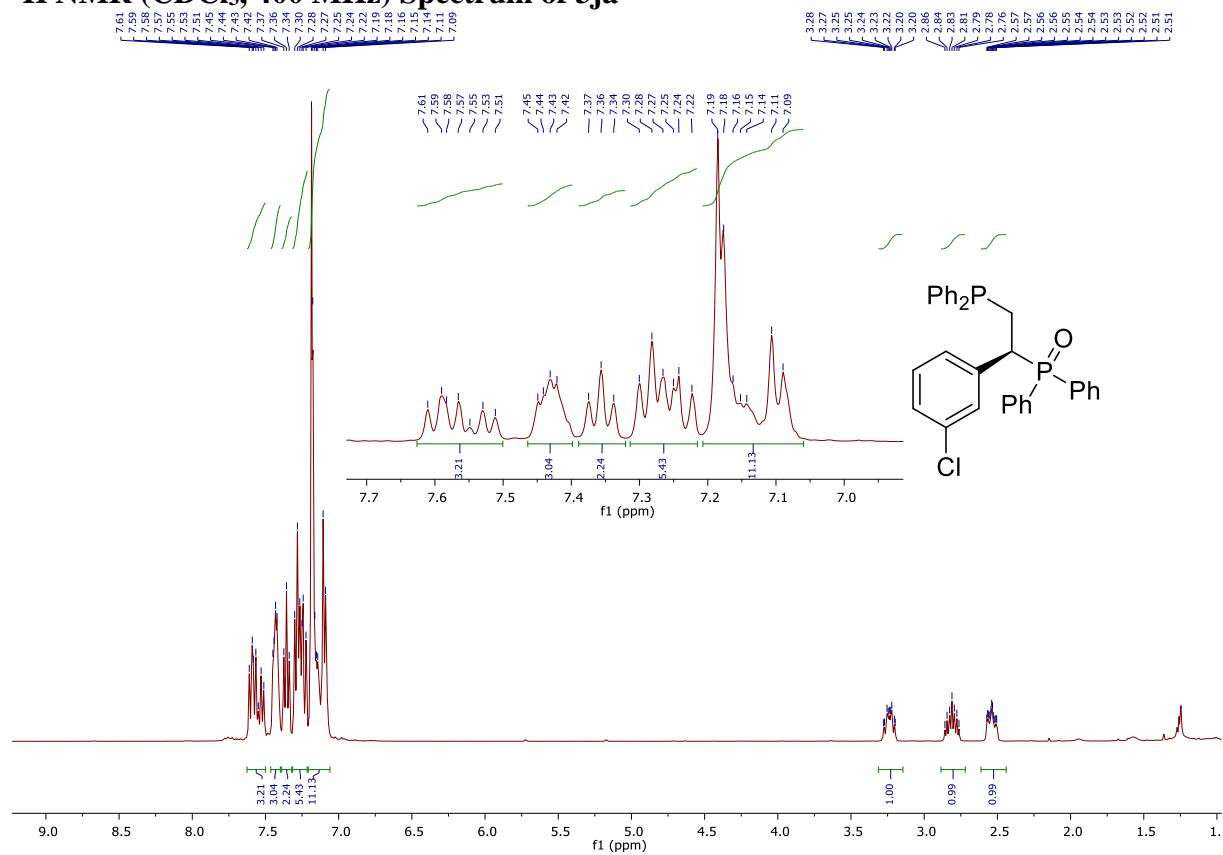

### <sup>13</sup>C NMR (CDCl<sub>3</sub>, 101 MHz) Spectrum of 3ja

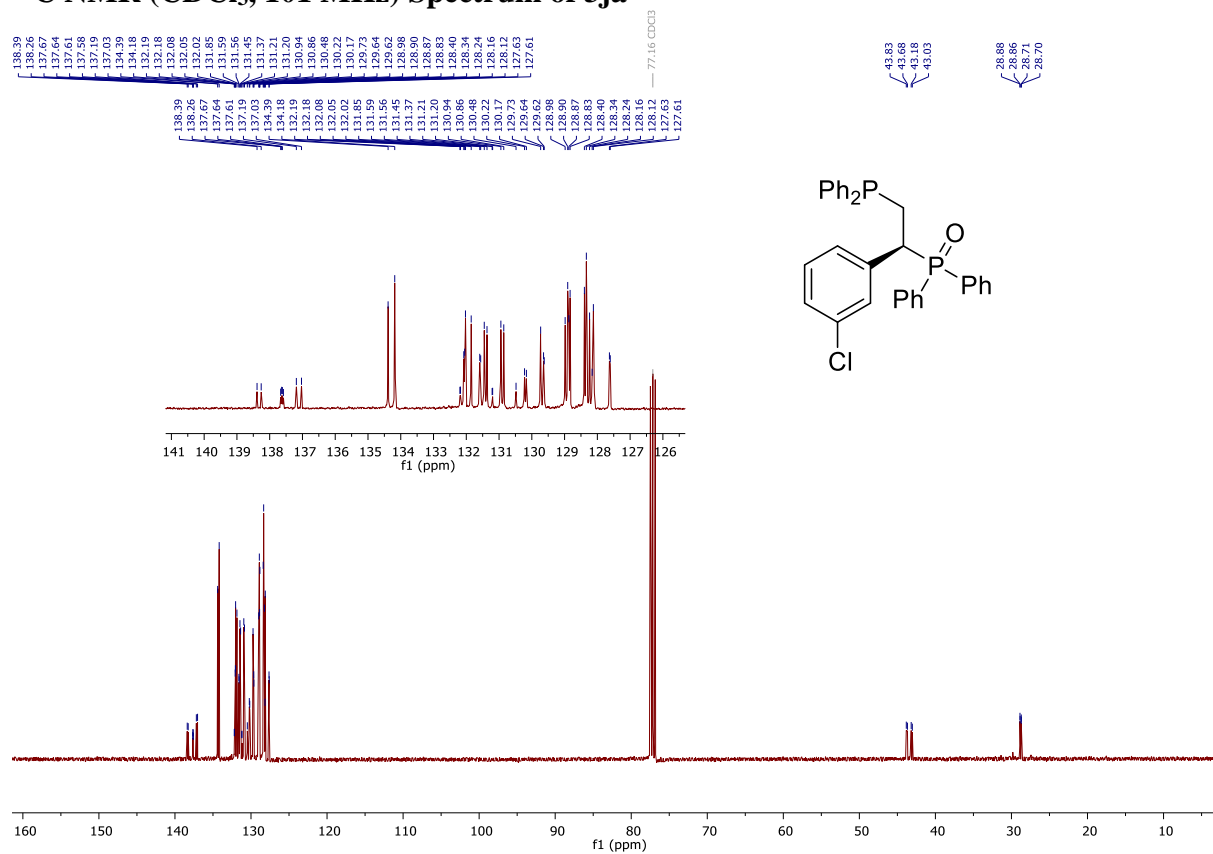

### <sup>31</sup>P NMR (CDCl<sub>3</sub>, 162 MHz) Spectrum of 3ja

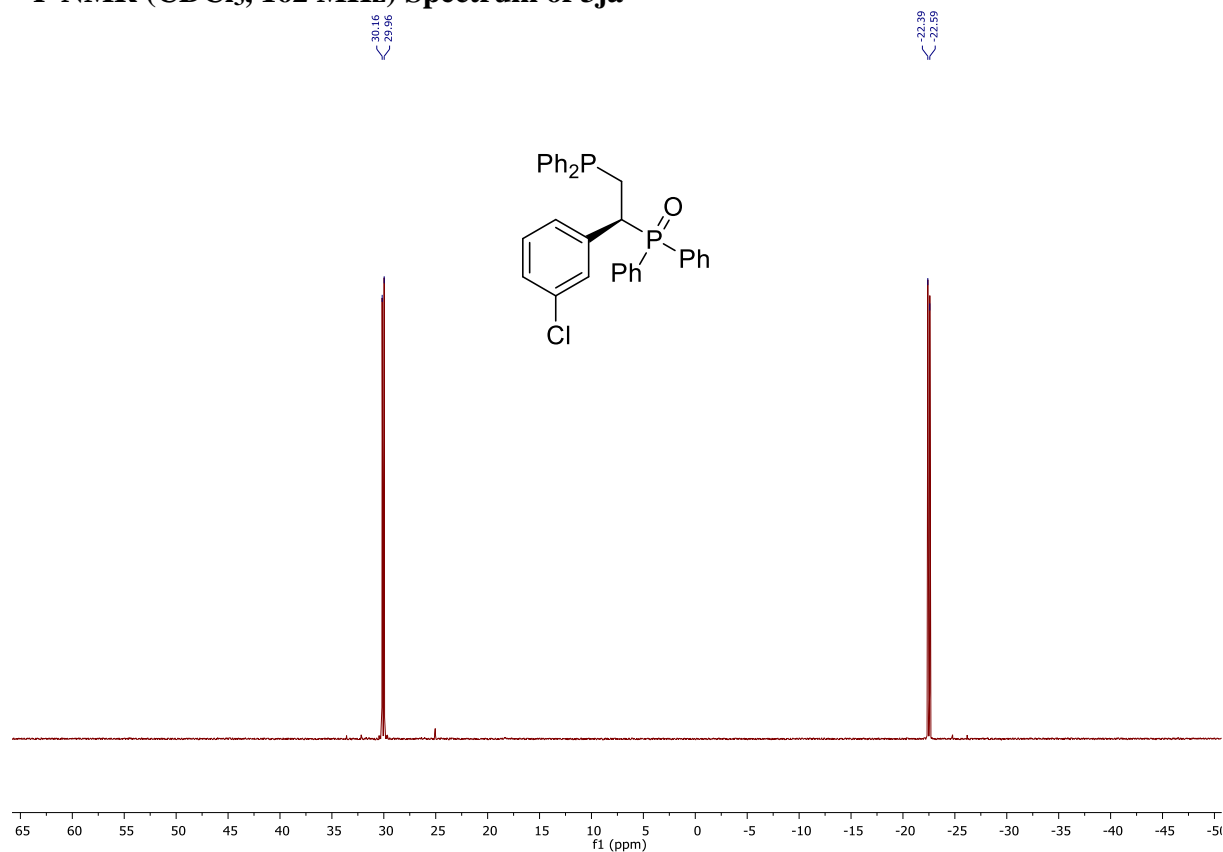

# <sup>1</sup>H NMR (CDCl<sub>3</sub>, 400 MHz) Spectrum of 3ka

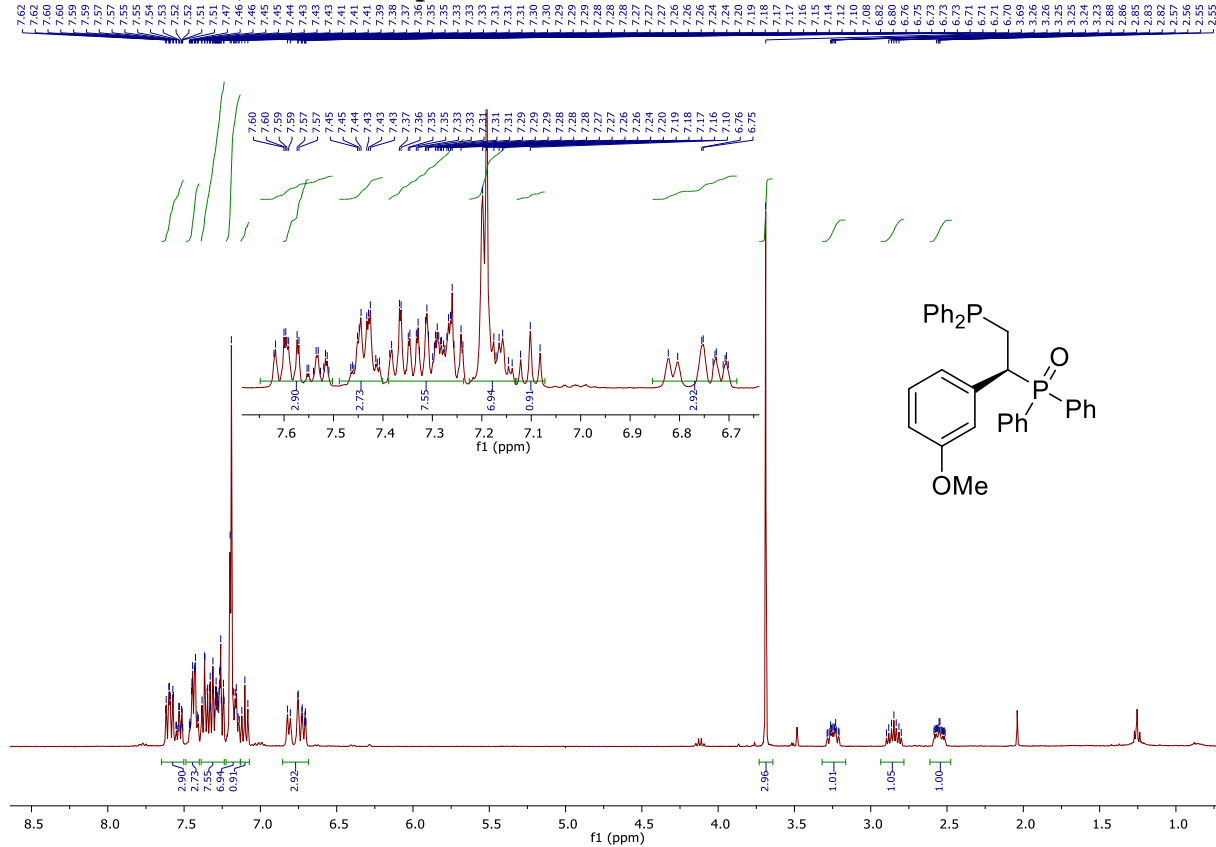

# <sup>13</sup>C NMR (CDCl<sub>3</sub>, 101 MHz) Spectrum of 3ka

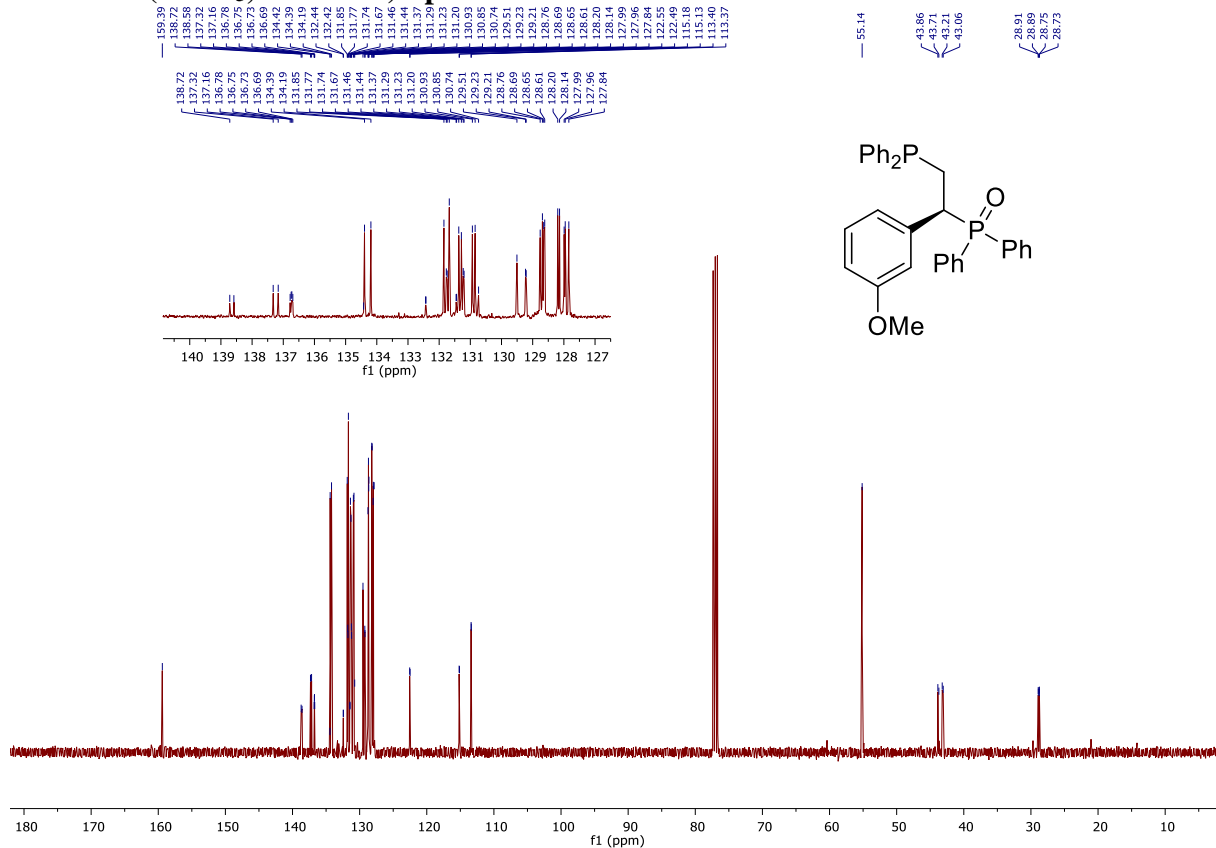

### <sup>31</sup>P NMR (CDCl<sub>3</sub>, 162 MHz) Spectrum of 3ka

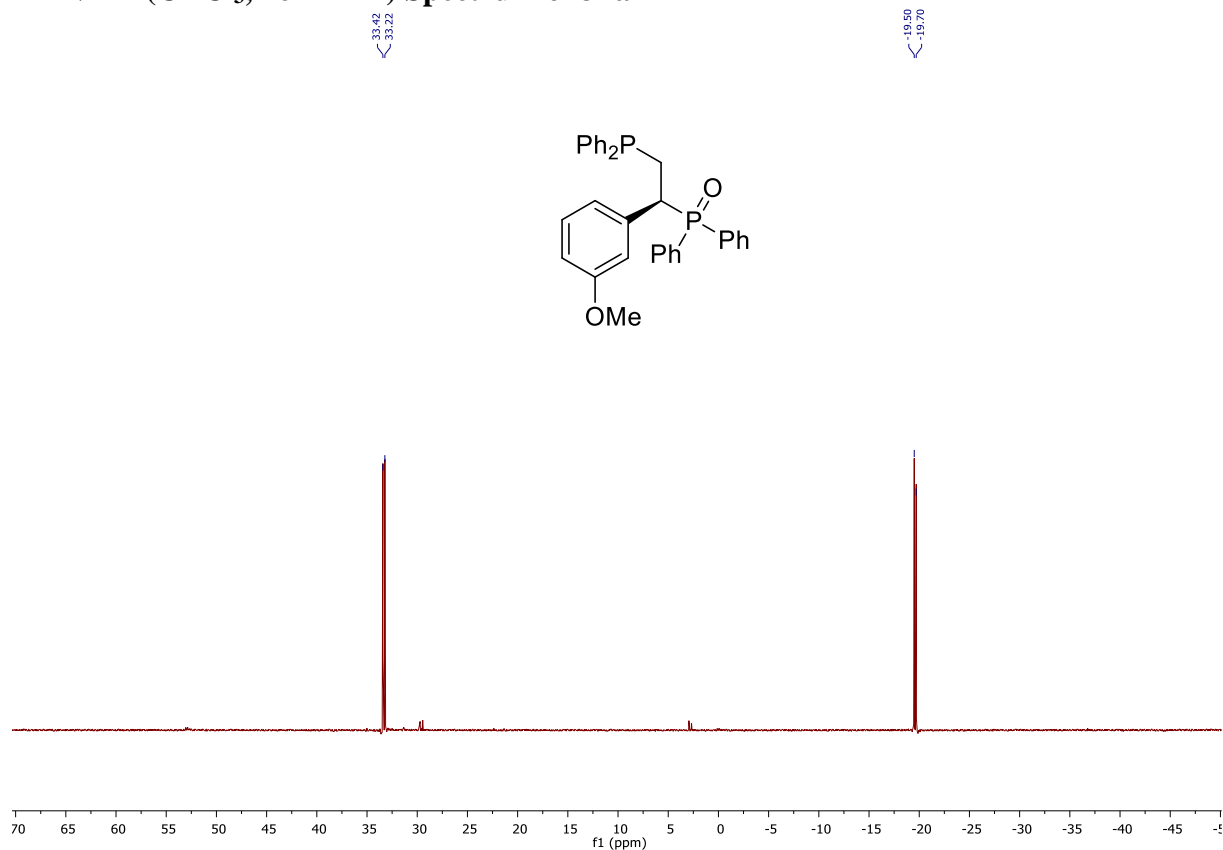

### <sup>1</sup>H NMR (CDCl<sub>3</sub>, 400 MHz) Spectrum of 3la

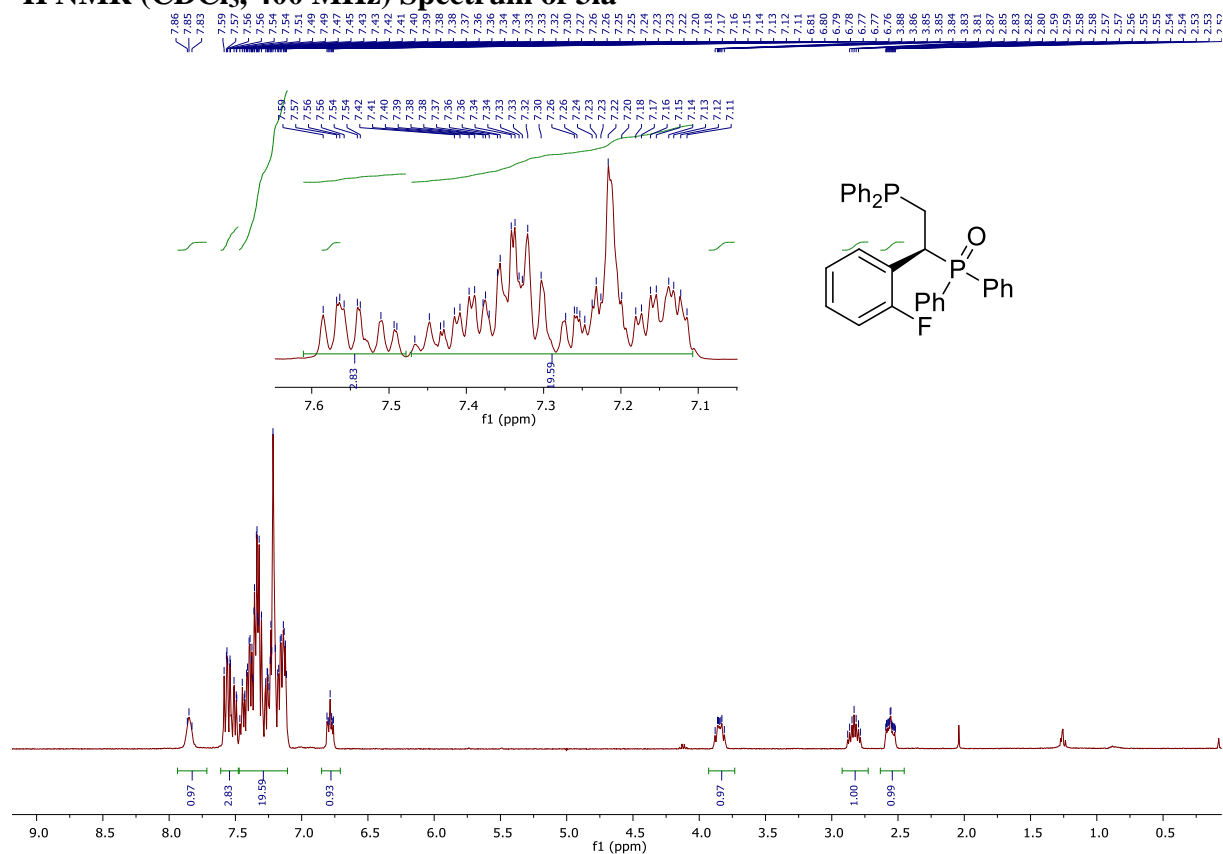

### $^{13}\text{C}$ NMR ( $\text{CDCl}_3$ , 101 MHz) Spectrum of 3a

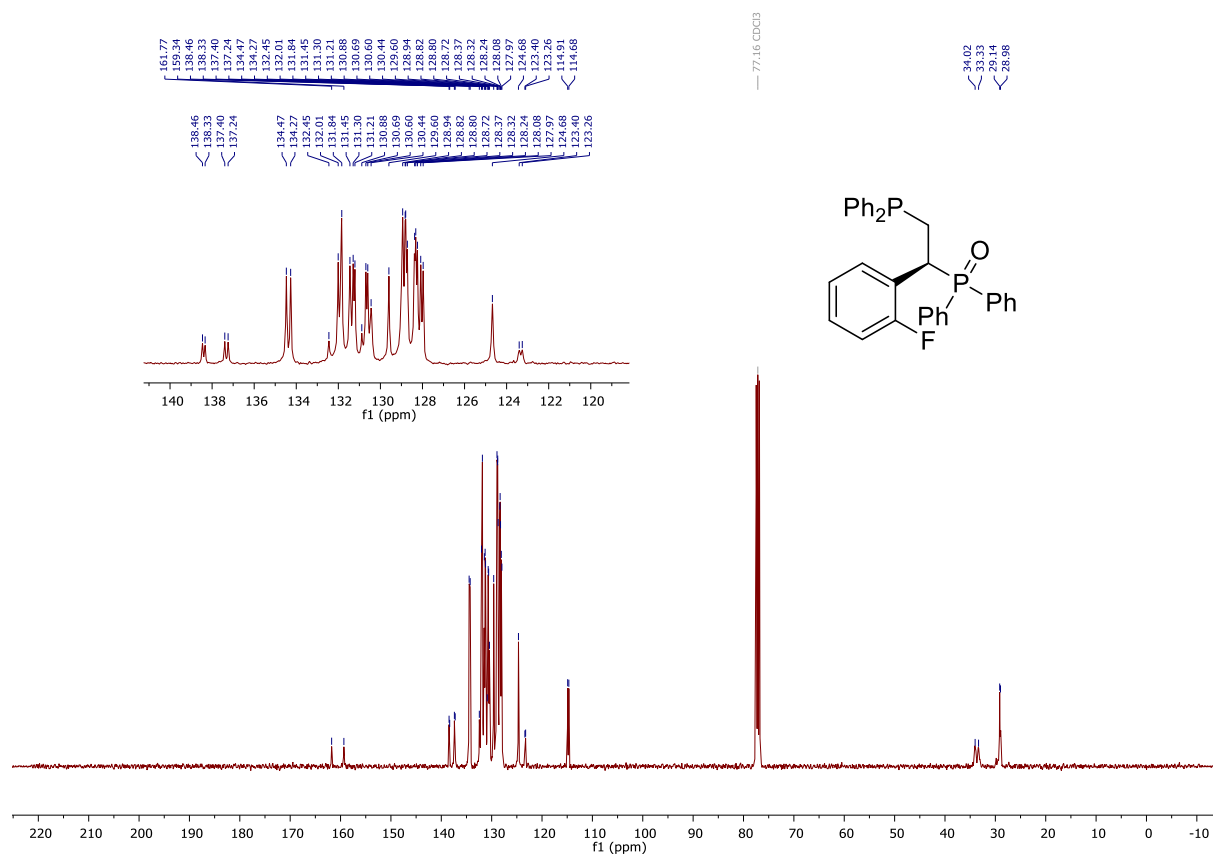

### $^{31}\text{P}$ NMR ( $\text{CDCl}_3$ , 162 MHz) Spectrum of 3a

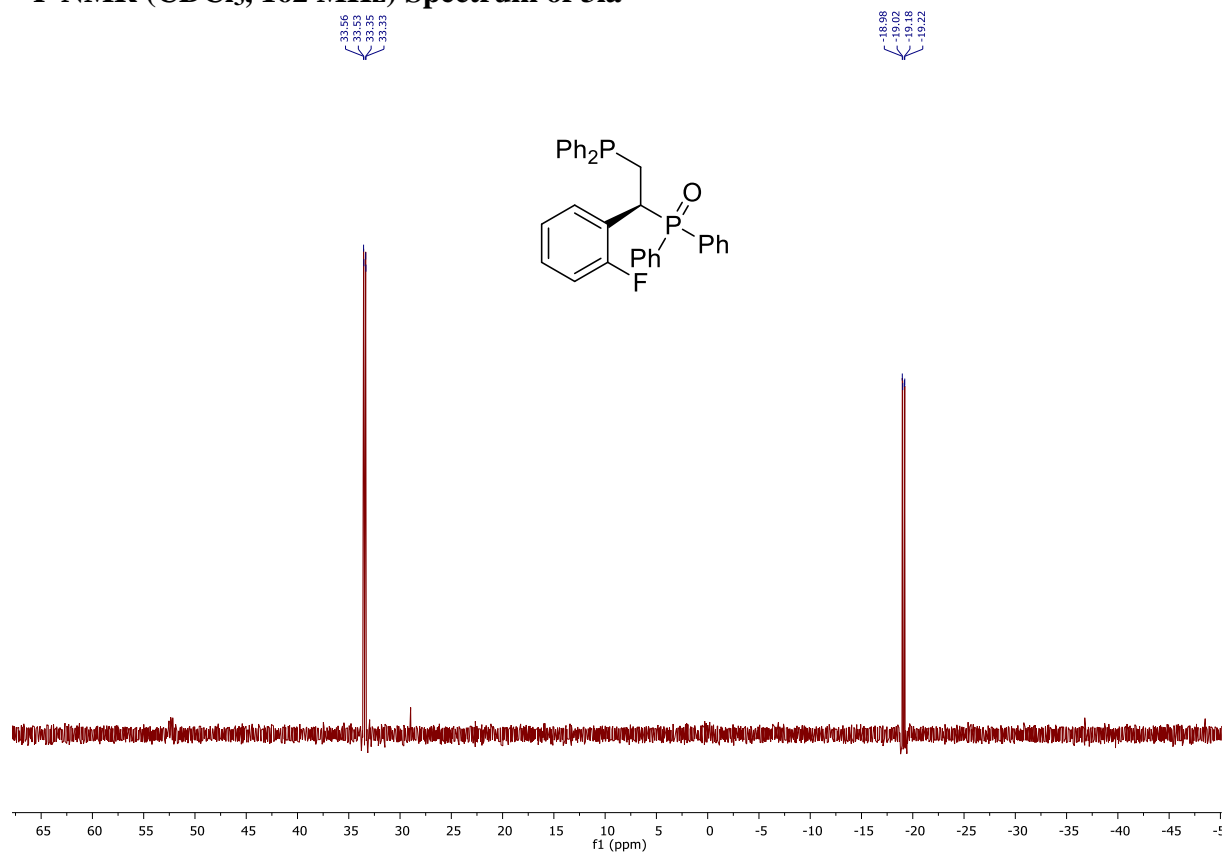

### $^{19}\text{F}$ NMR ( $\text{CDCl}_3$ , 376 MHz) Spectrum of 3la

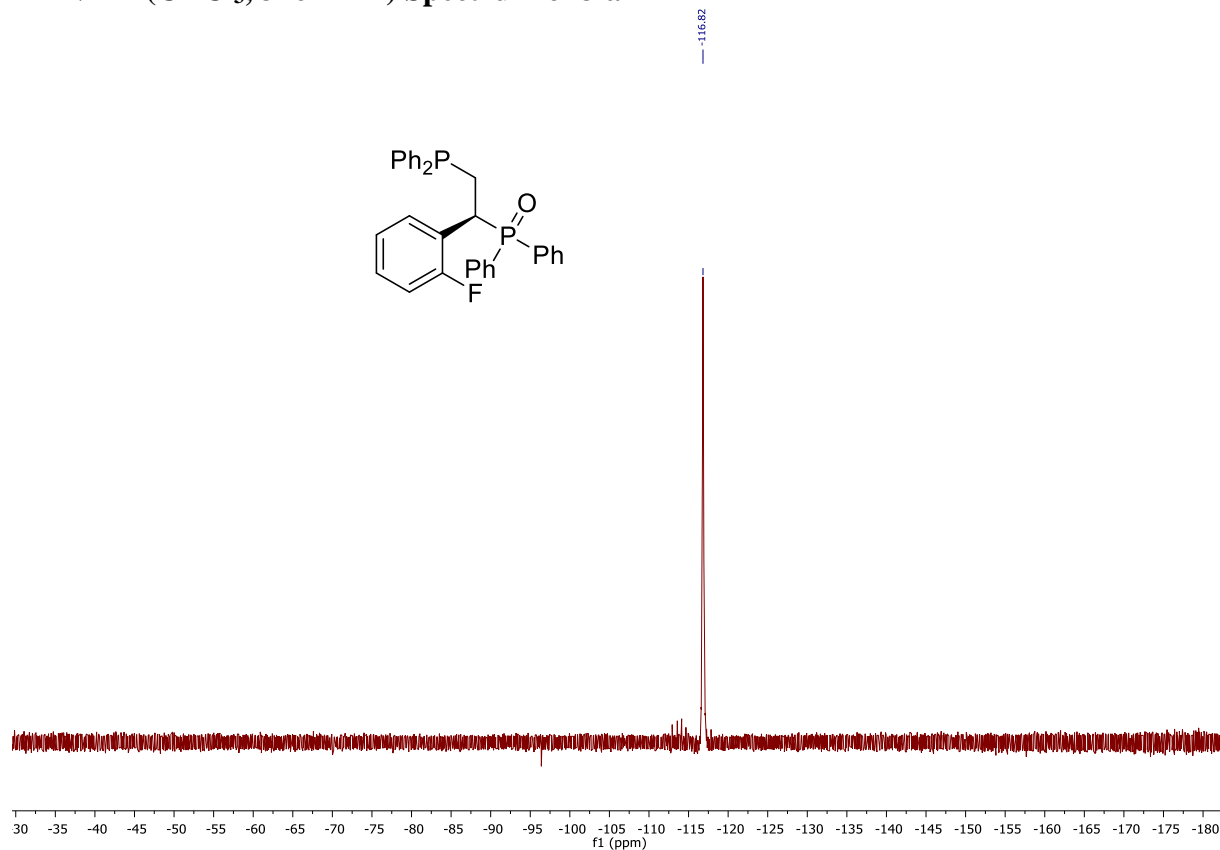

### $^1\text{H}$ NMR ( $\text{CDCl}_3$ , 400 MHz) Spectrum of 3ma

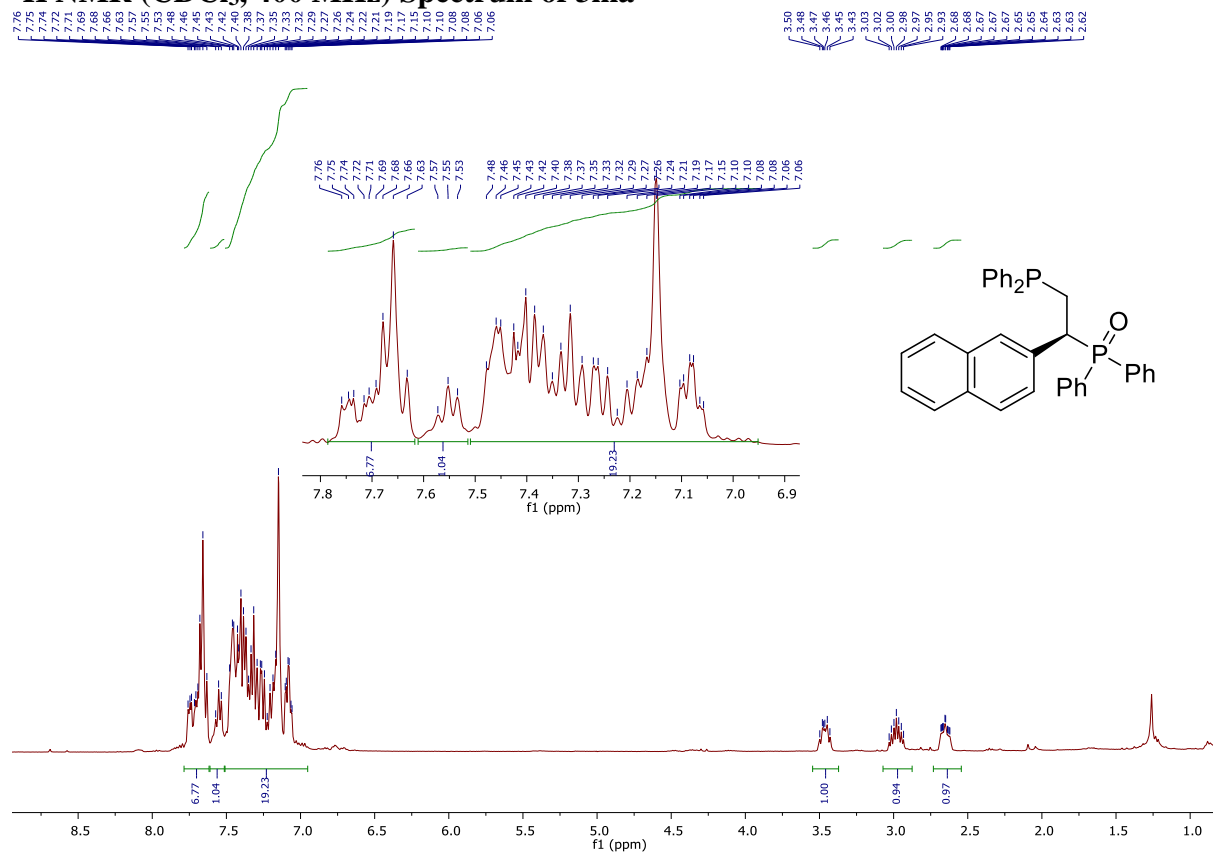

### <sup>13</sup>C NMR (CDCl<sub>3</sub>, 101 MHz) Spectrum of 3ma

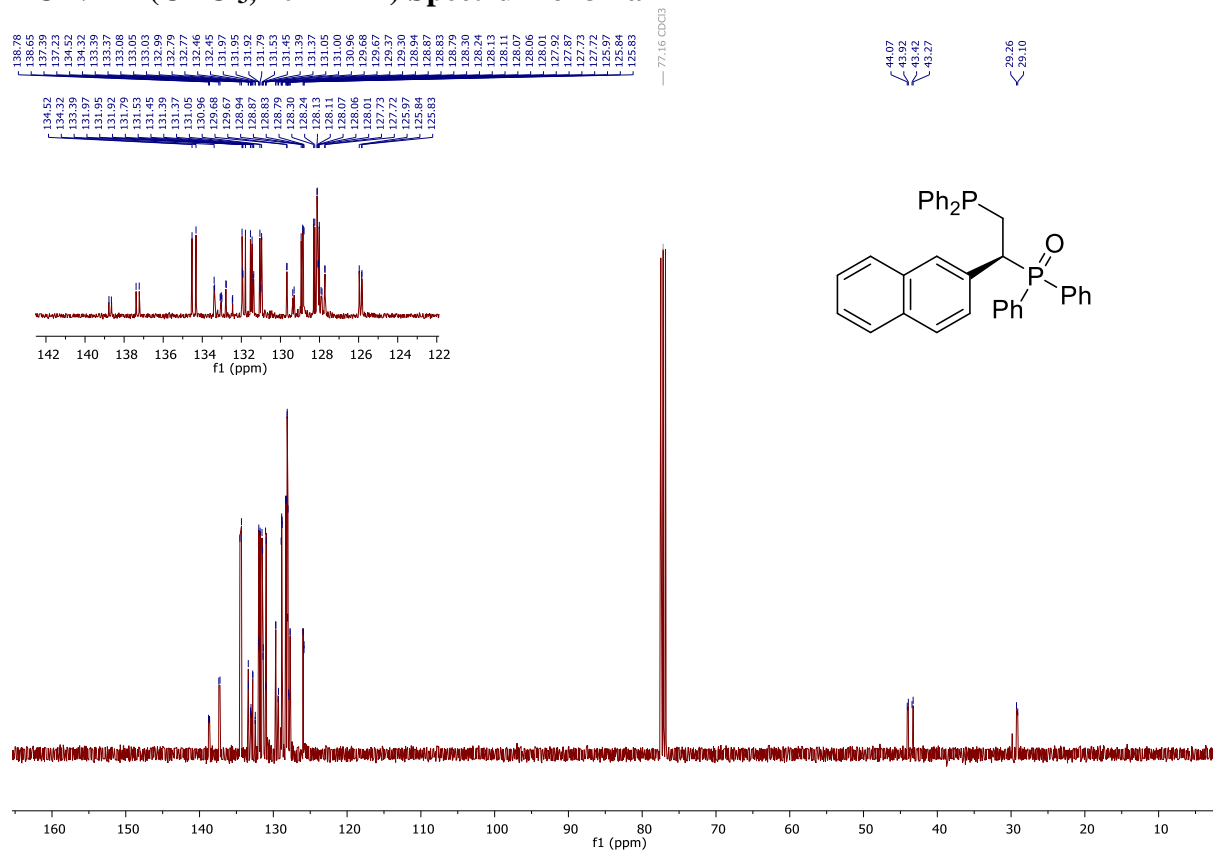

### <sup>31</sup>P NMR (CDCl<sub>3</sub>, 162 MHz) Spectrum of 3ma

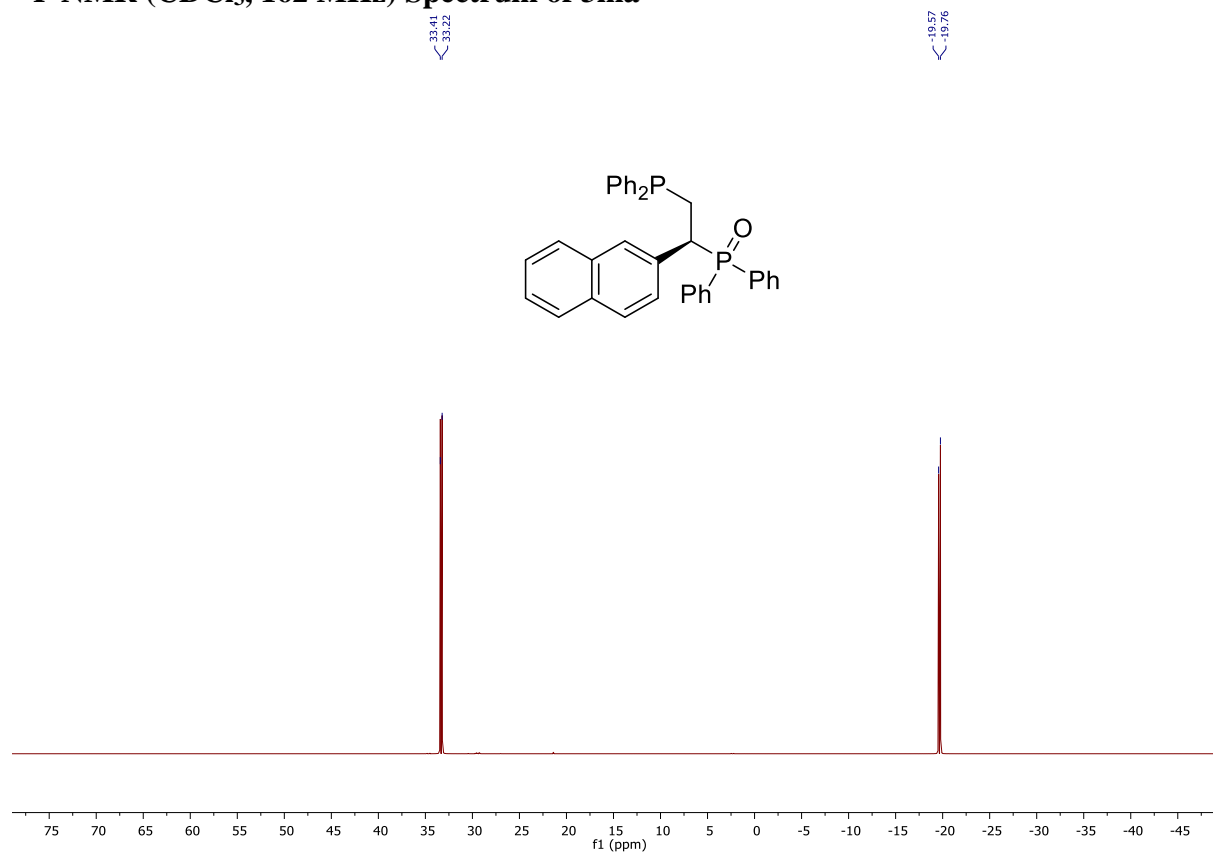

### <sup>1</sup>H NMR (CDCl<sub>3</sub>, 400 MHz) Spectrum of 3na

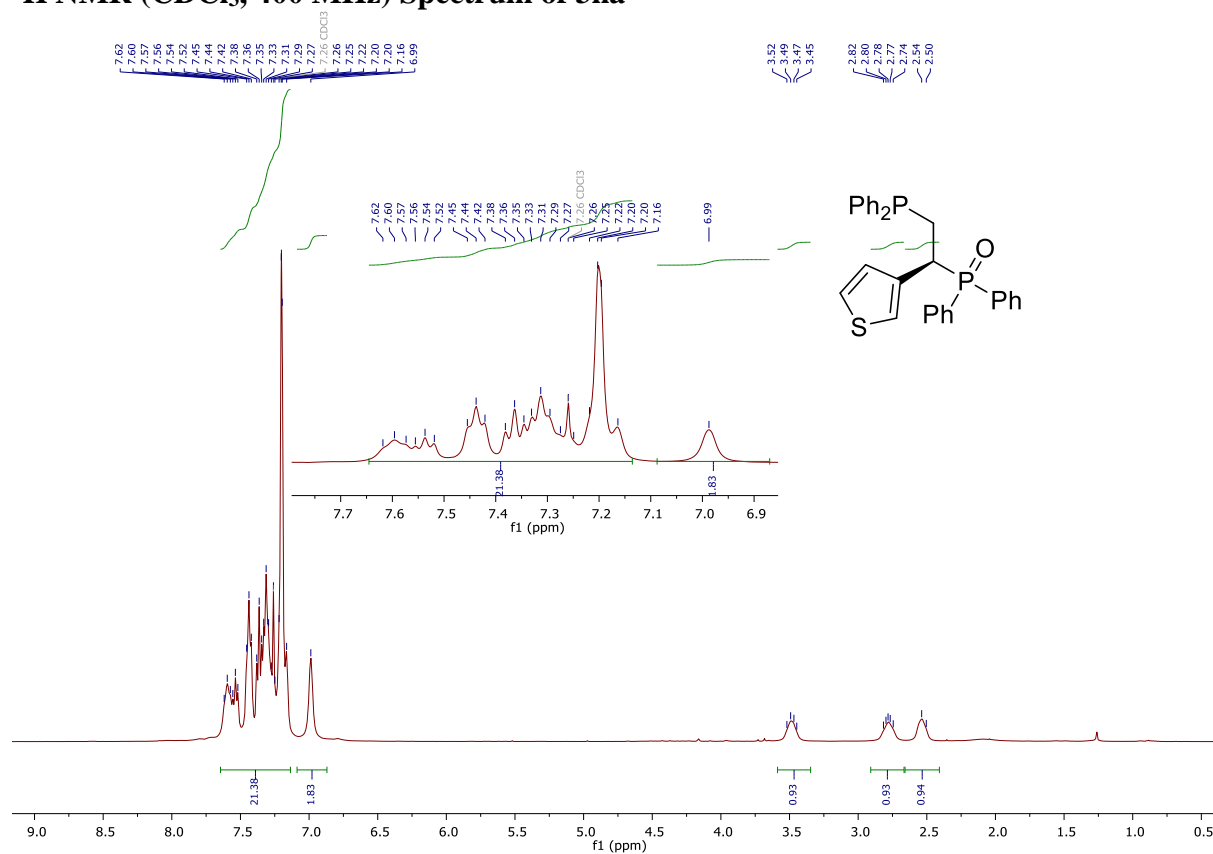

### <sup>13</sup>C NMR (CDCl<sub>3</sub>, 101 MHz) Spectrum of 3na

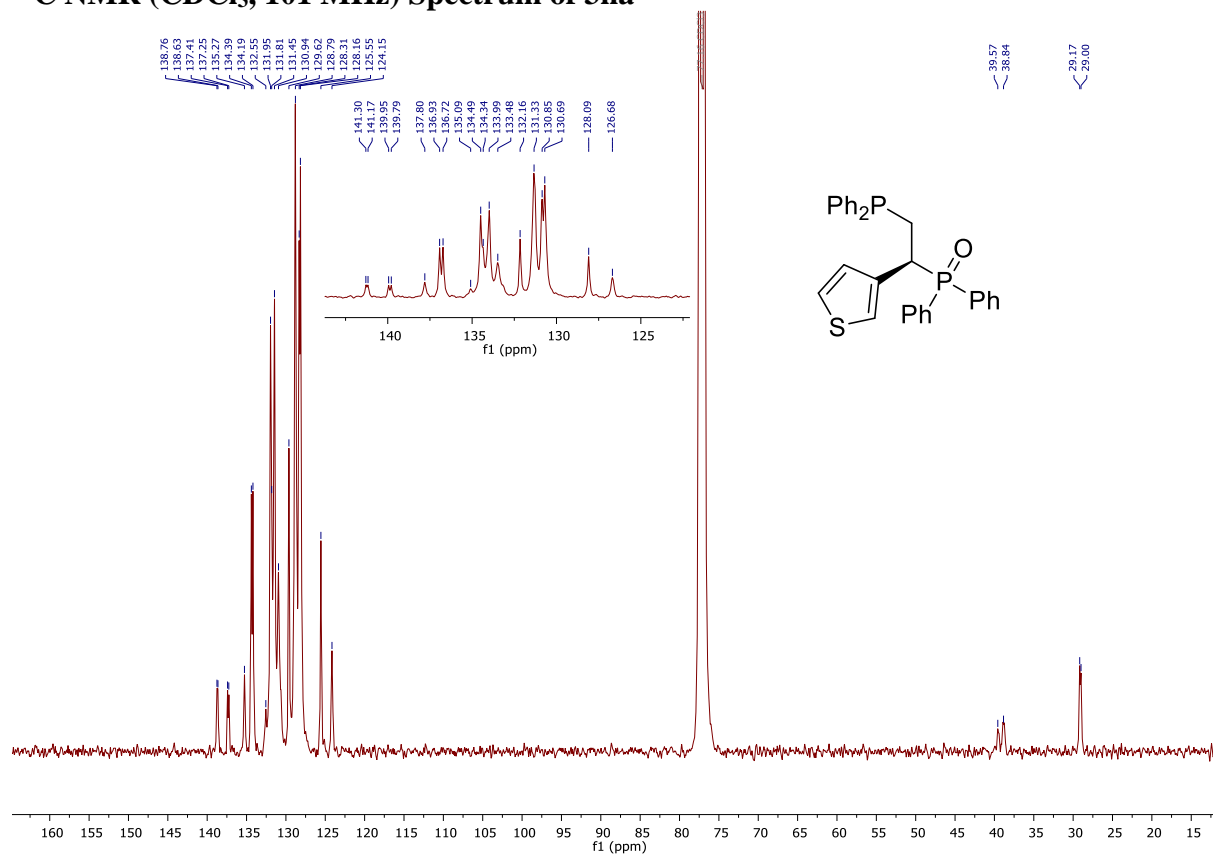



### $^{31}\text{P}$ NMR ( $\text{CDCl}_3$ , 162 MHz) Spectrum of 3na

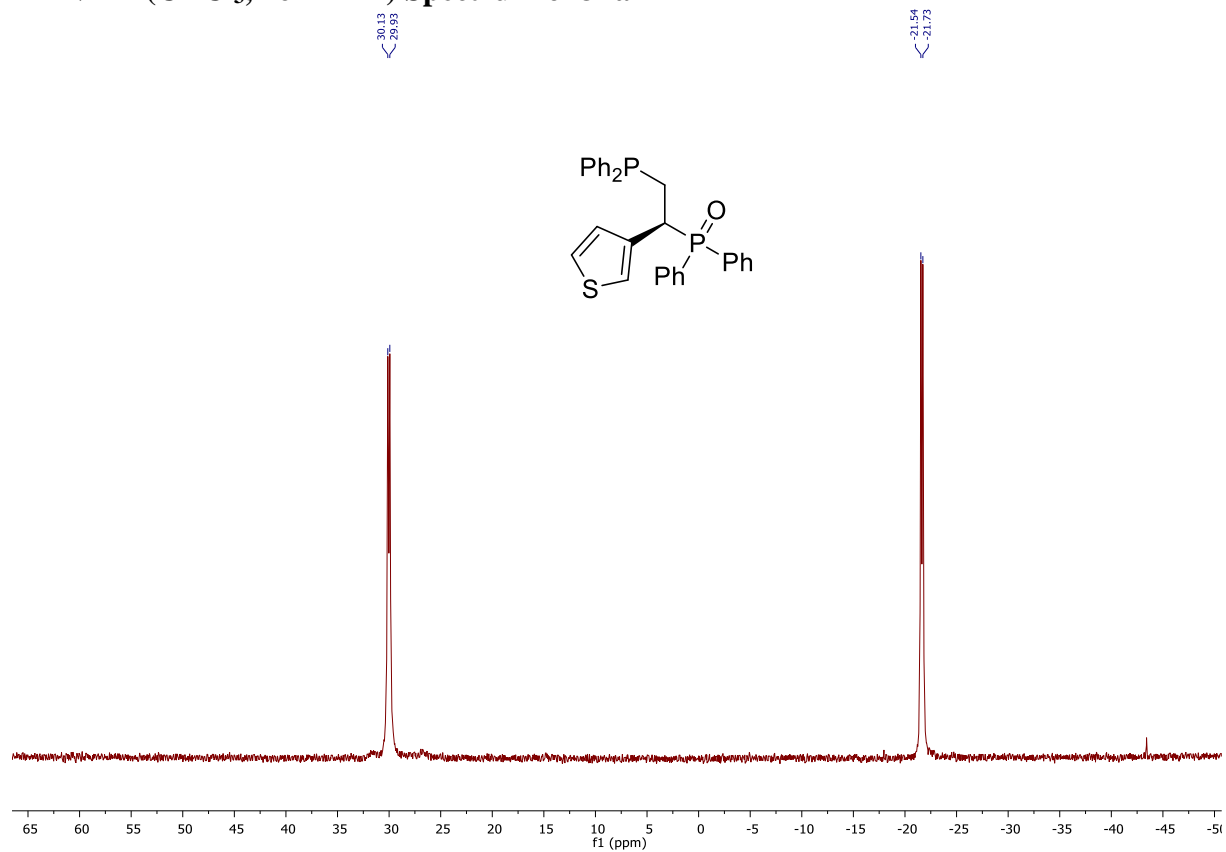

### $^1\text{H}$ NMR ( $\text{CDCl}_3$ , 400 MHz) Spectrum of 3oa

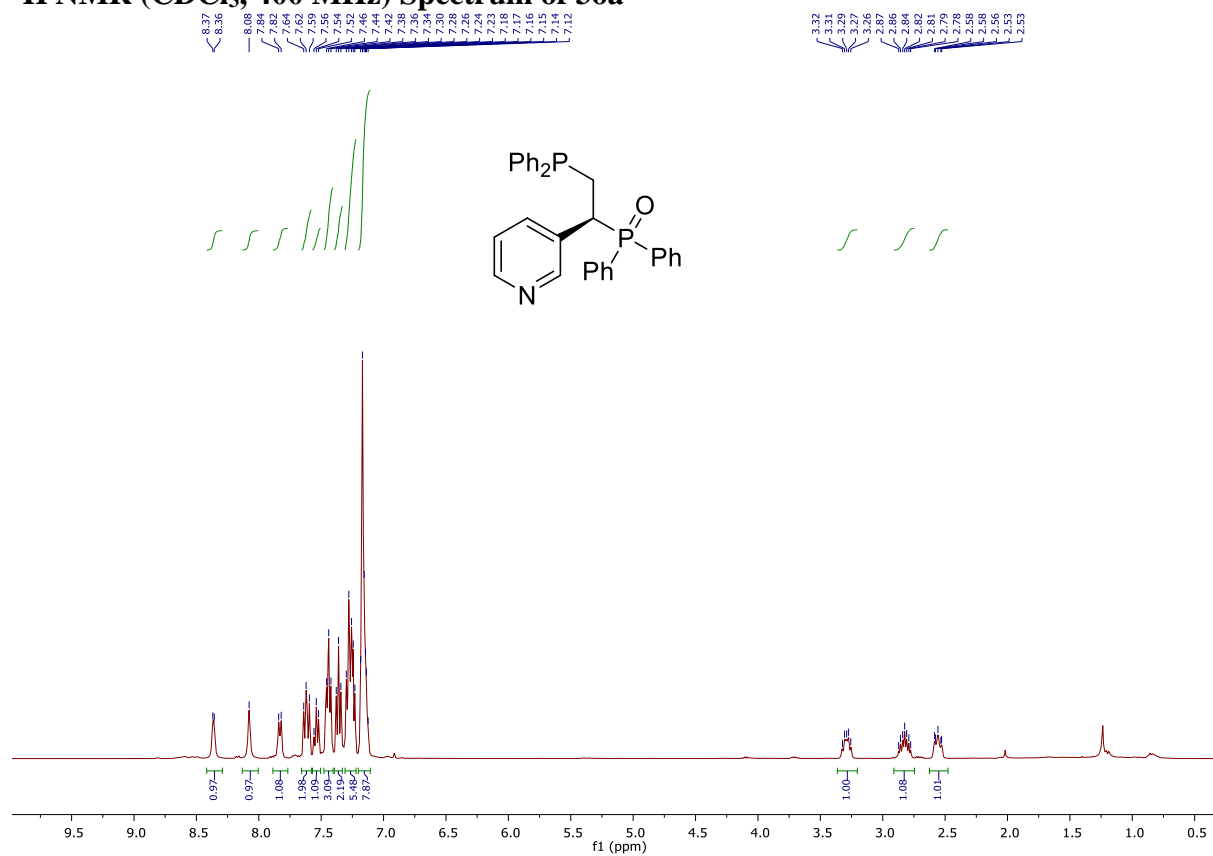

### <sup>13</sup>C NMR (CDCl<sub>3</sub>, 101 MHz) Spectrum of 30a

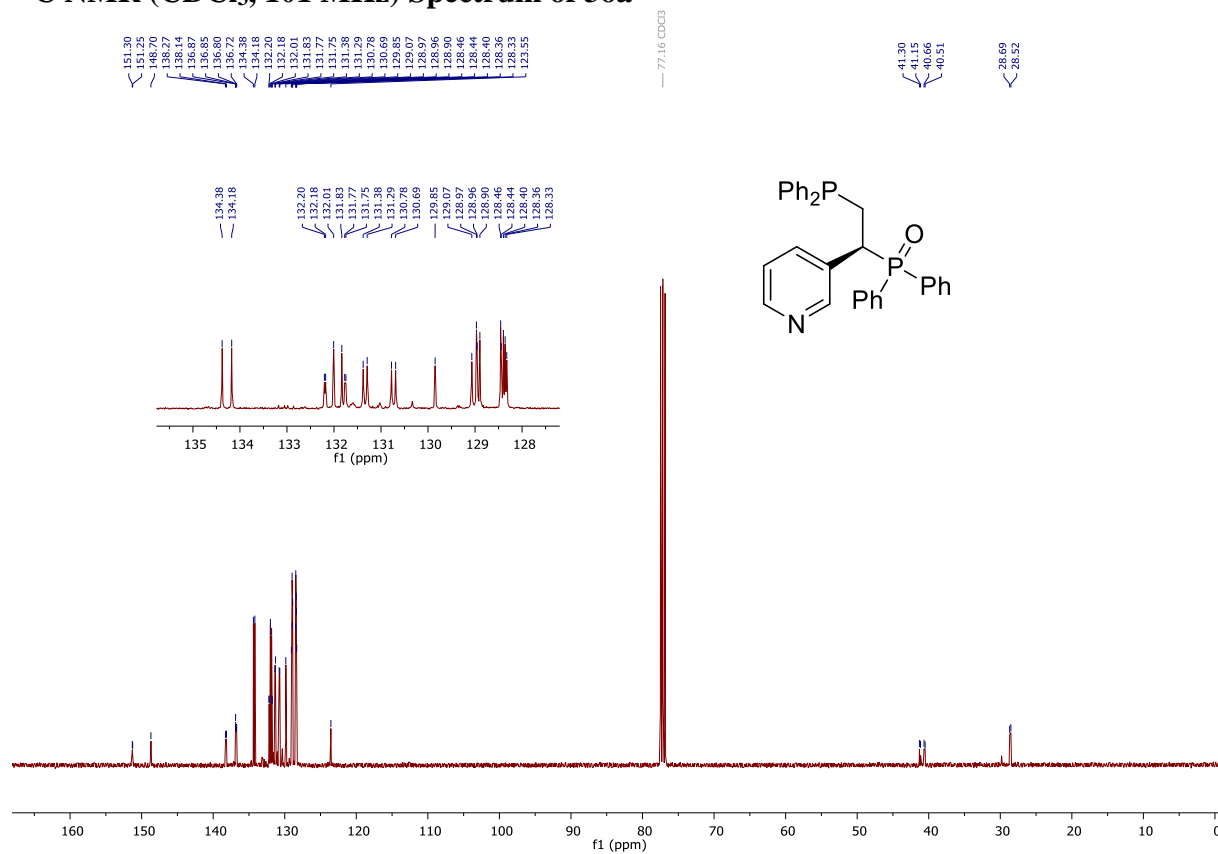

### <sup>31</sup>P NMR (CDCl<sub>3</sub>, 162 MHz) Spectrum of 30a

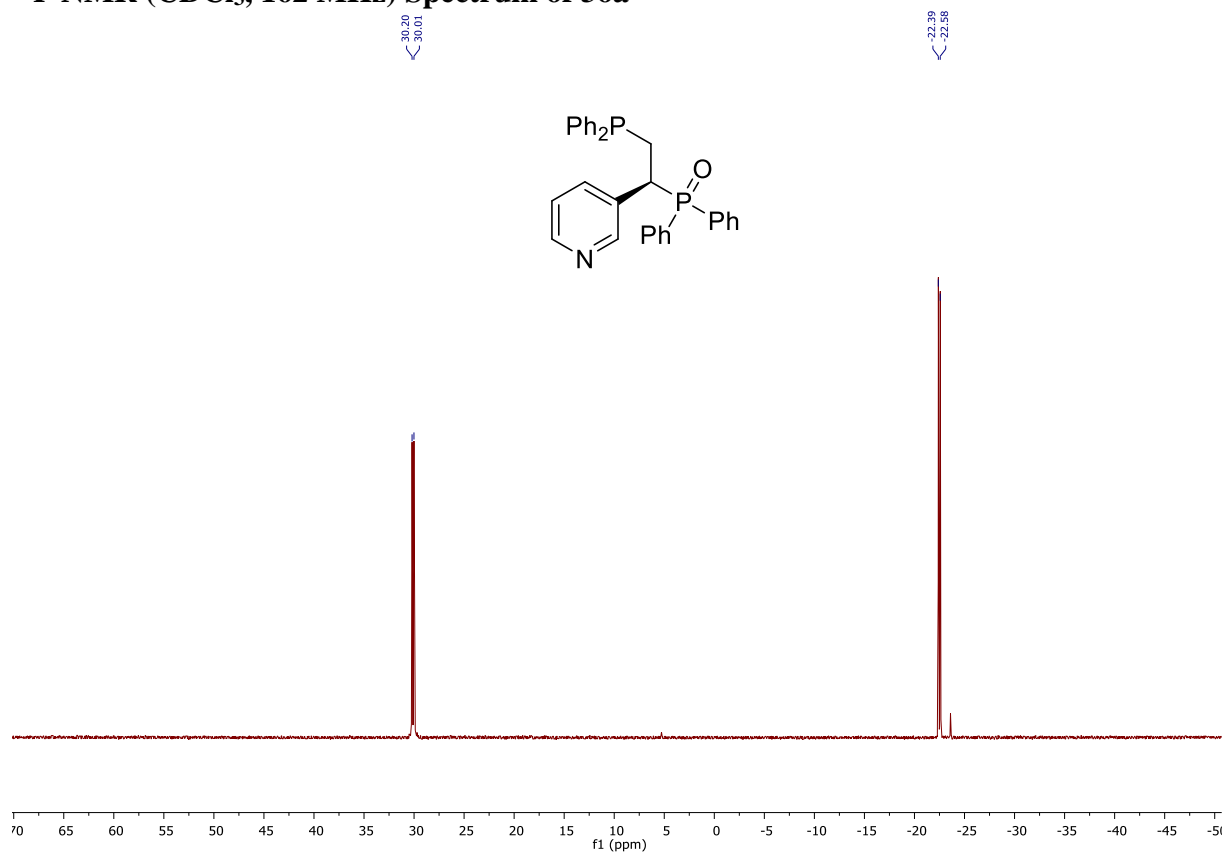

### <sup>1</sup>H NMR (CDCl<sub>3</sub>, 400 MHz) Spectrum of 3pa

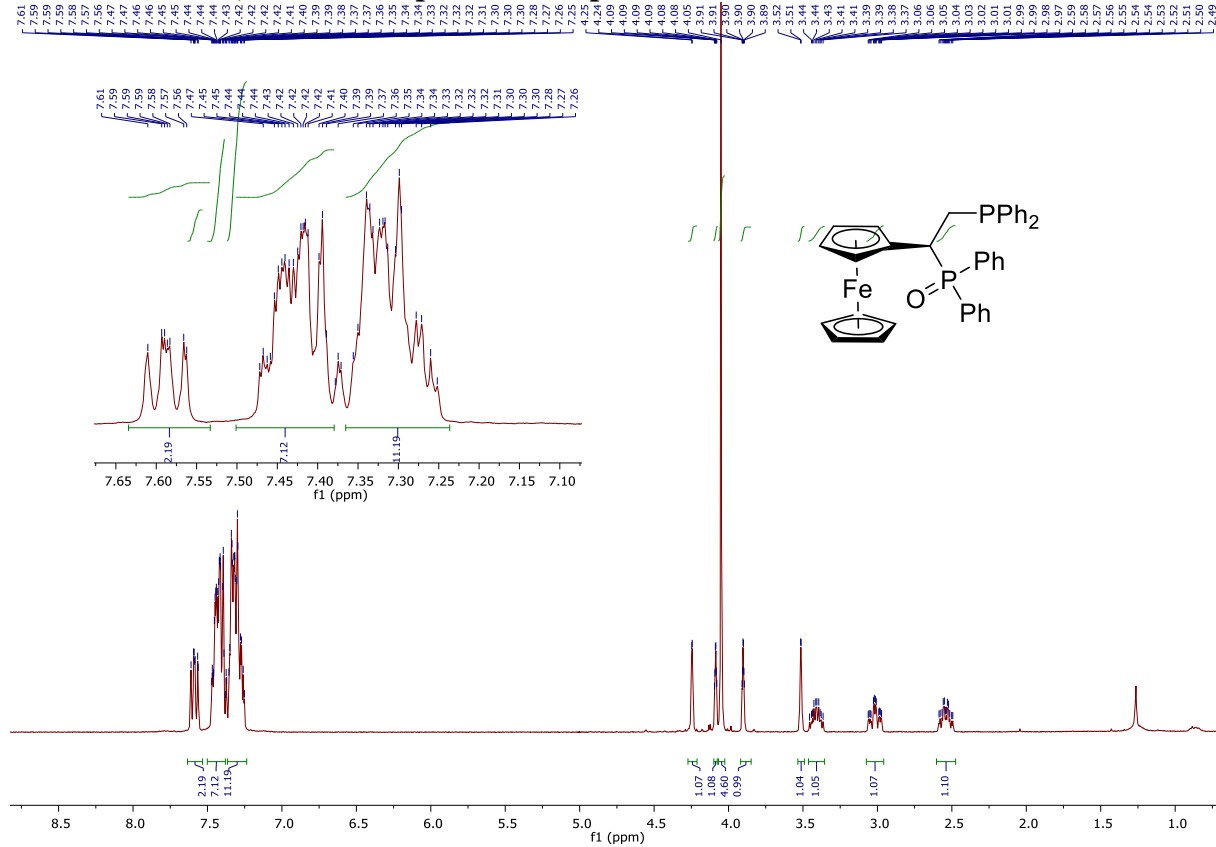

### <sup>13</sup>C NMR (CDCl<sub>3</sub>, 101 MHz) Spectrum of 3pa

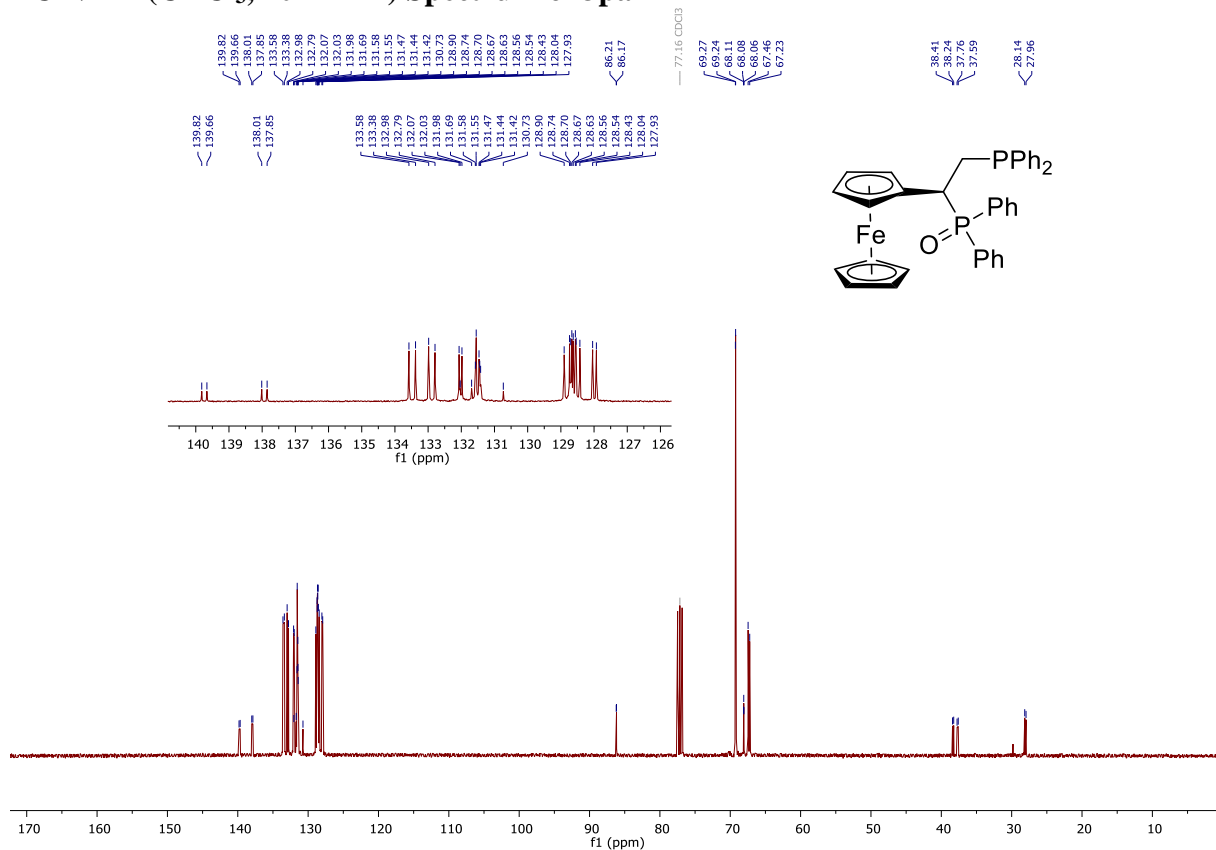

### <sup>31</sup>P NMR (CDCl<sub>3</sub>, 162 MHz) Spectrum of 3pa

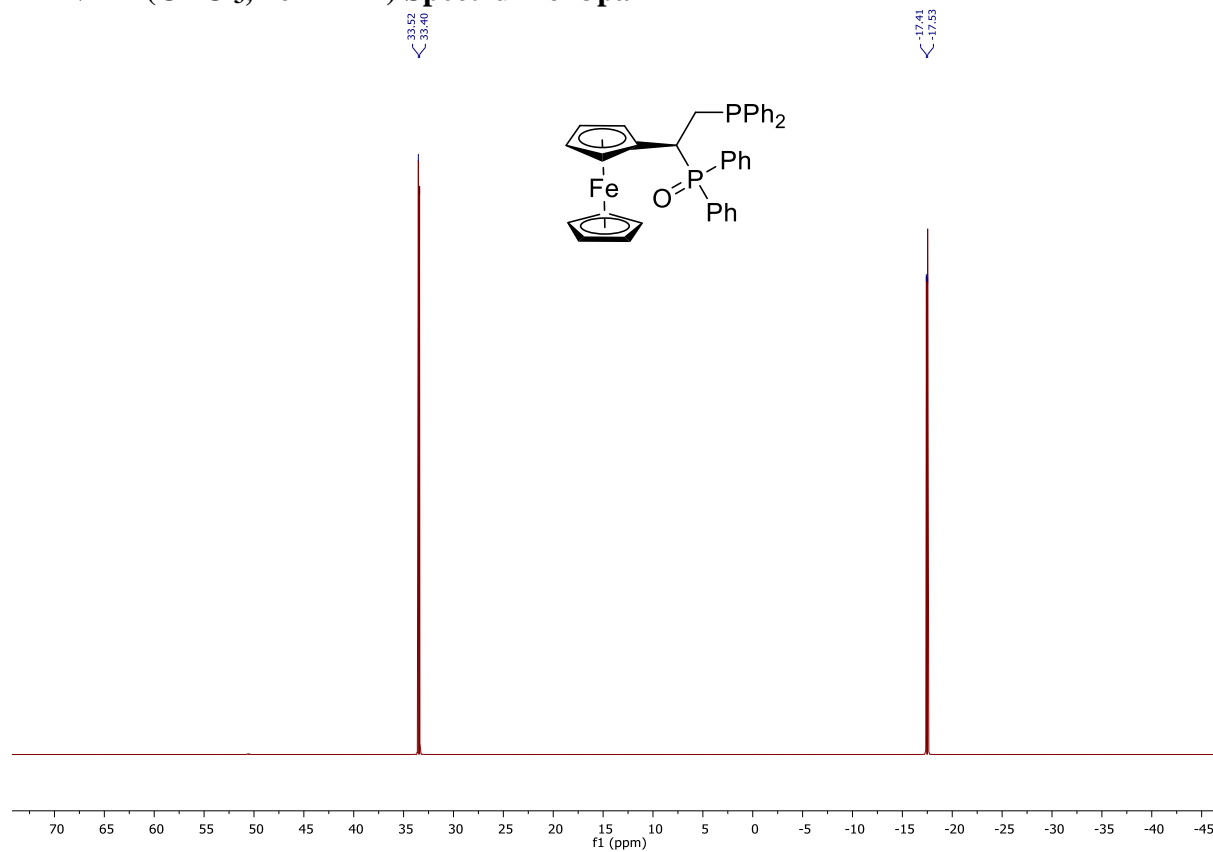

### <sup>1</sup>H NMR (CDCl<sub>3</sub>, 400 MHz) Spectrum of 3qa

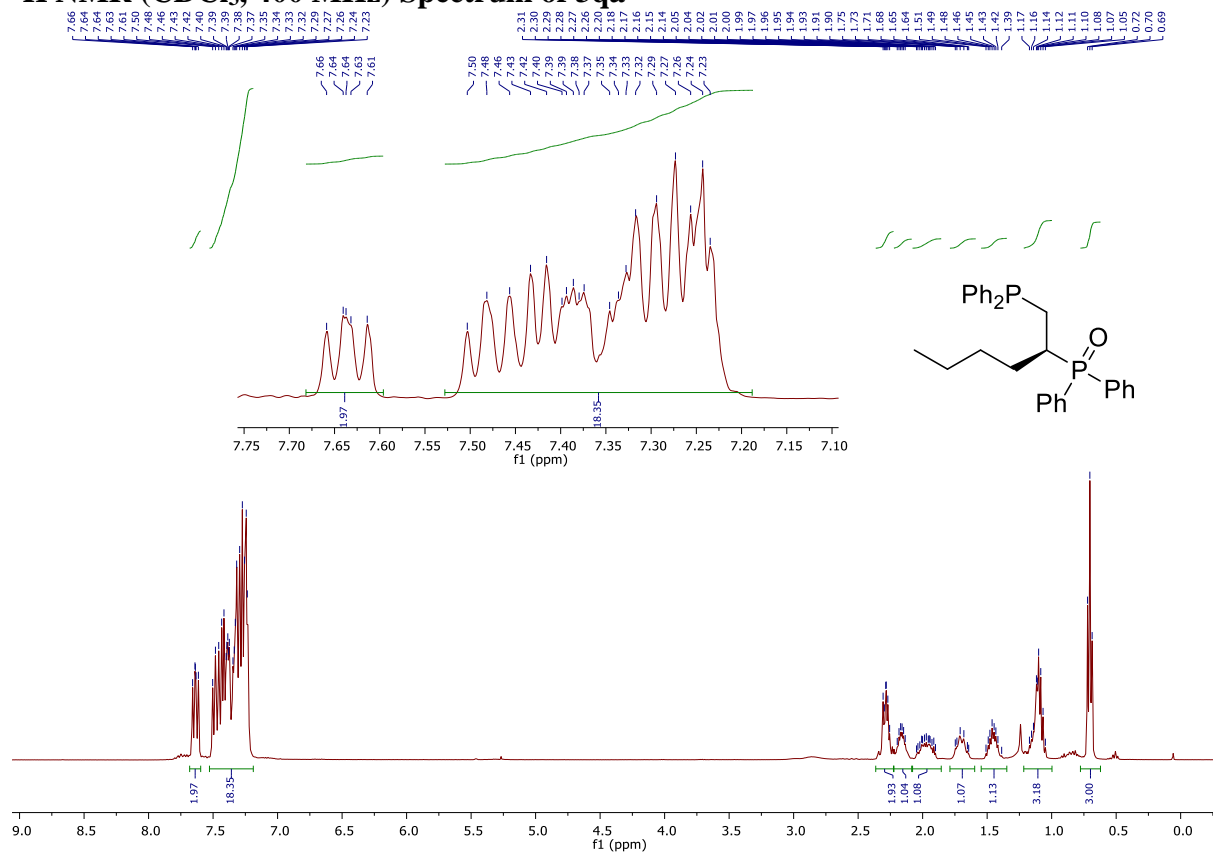

### <sup>13</sup>C NMR (CDCl<sub>3</sub>, 101 MHz) Spectrum of 3qa

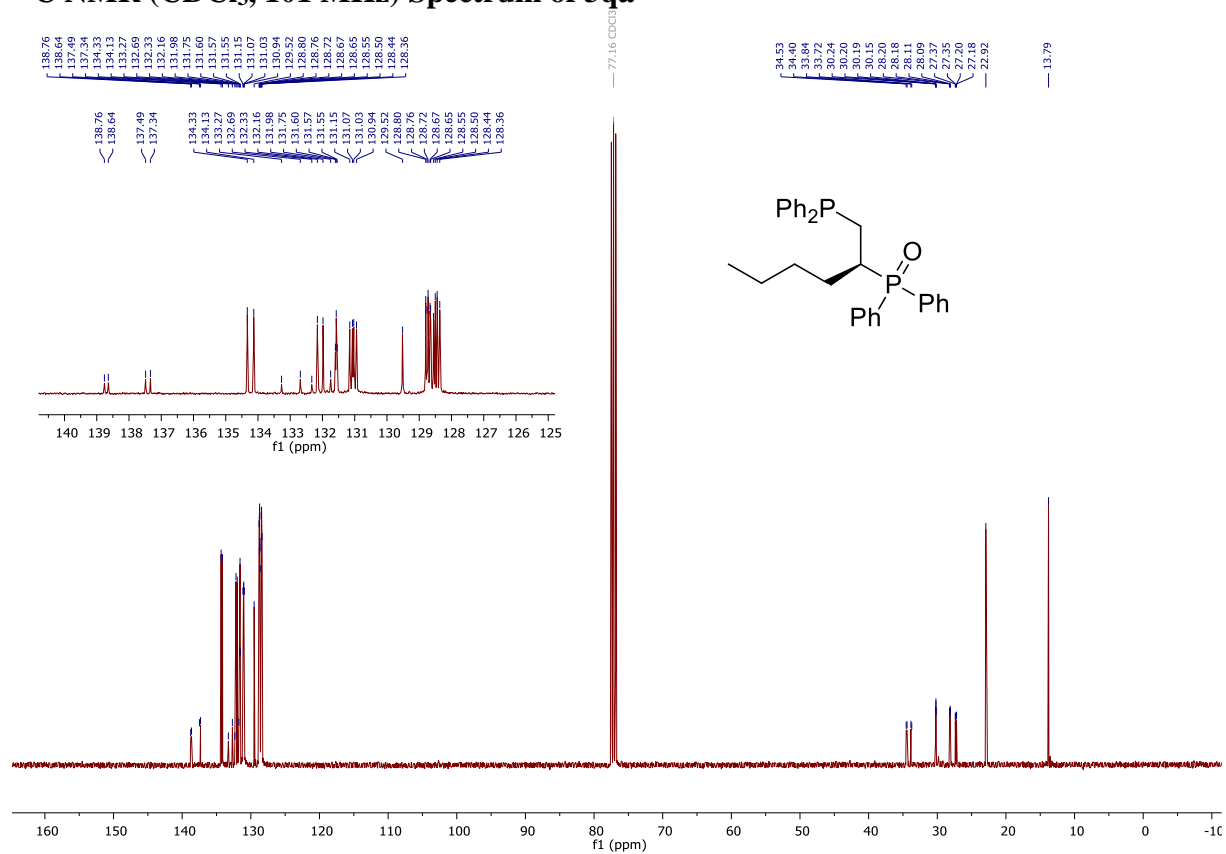

### <sup>31</sup>P NMR (CDCl<sub>3</sub>, 101 MHz) Spectrum of 3qa

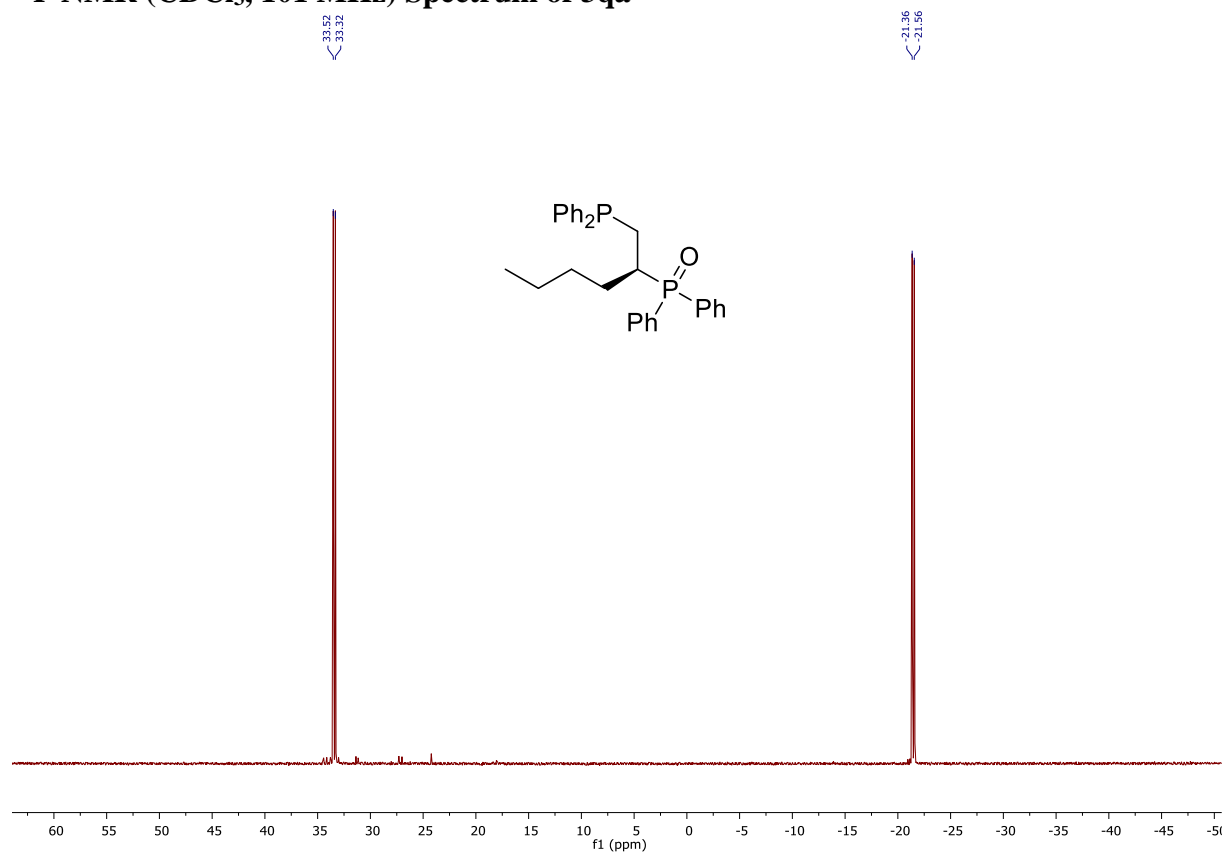

# <sup>1</sup>H NMR (CDCl<sub>3</sub>, 400 MHz) Spectrum of 3ra

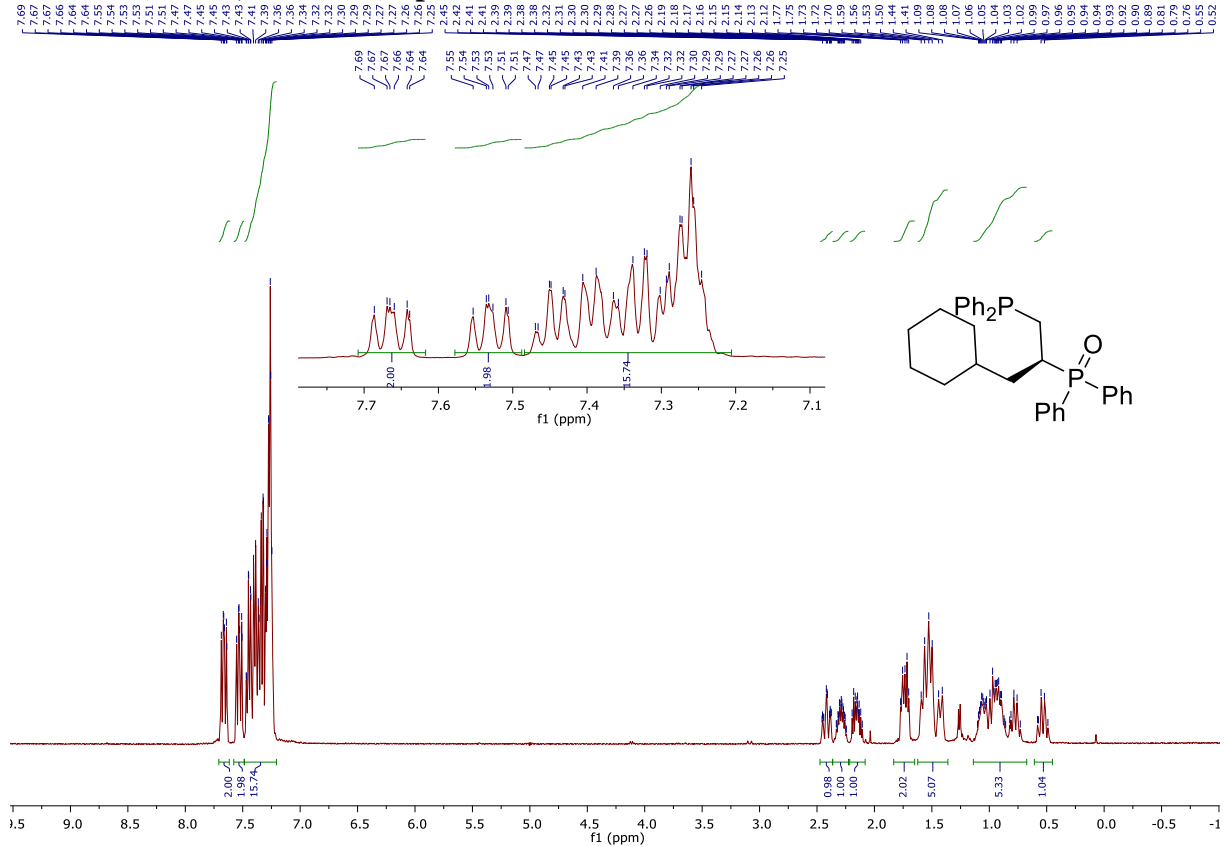

# <sup>13</sup>C NMR (CDCl<sub>3</sub>, 101 MHz) Spectrum of 3ra

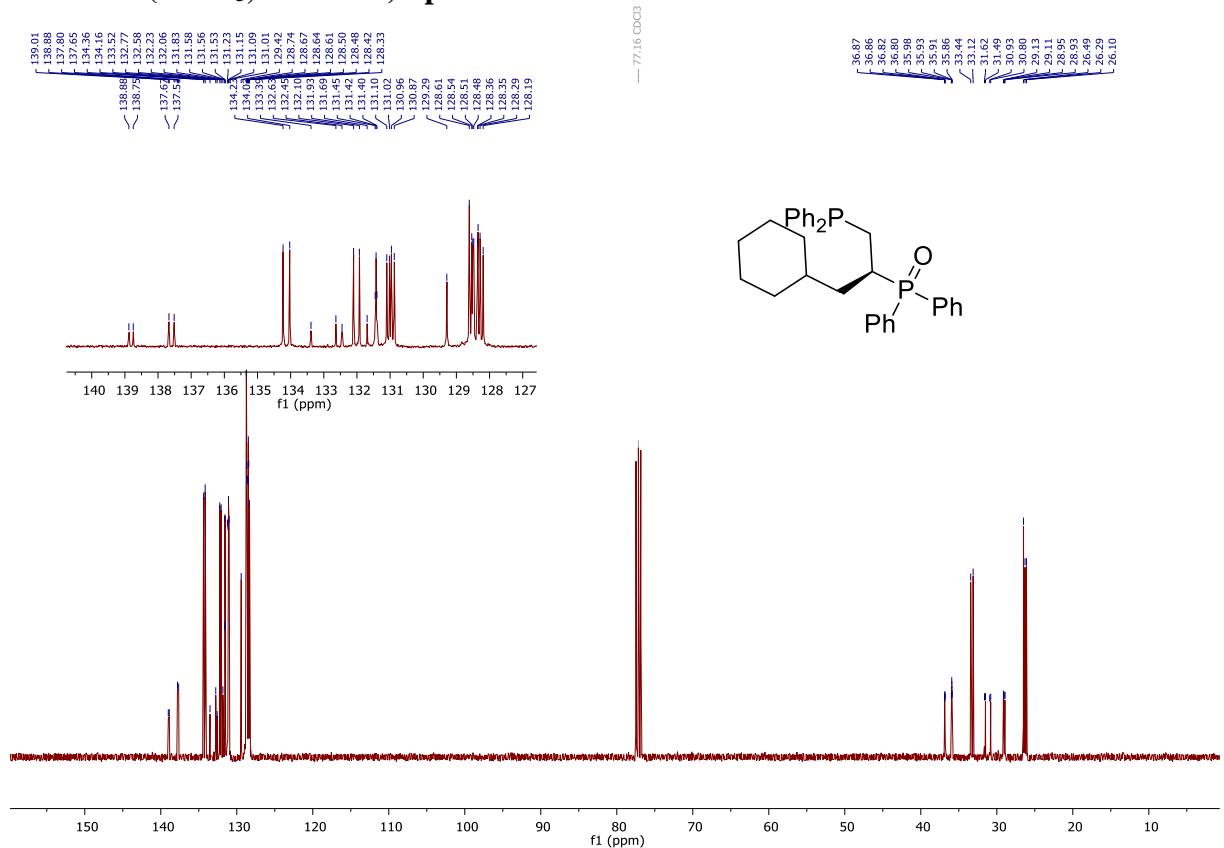

### <sup>31</sup>P NMR (CDCl<sub>3</sub>, 101 MHz) Spectrum of 3ra

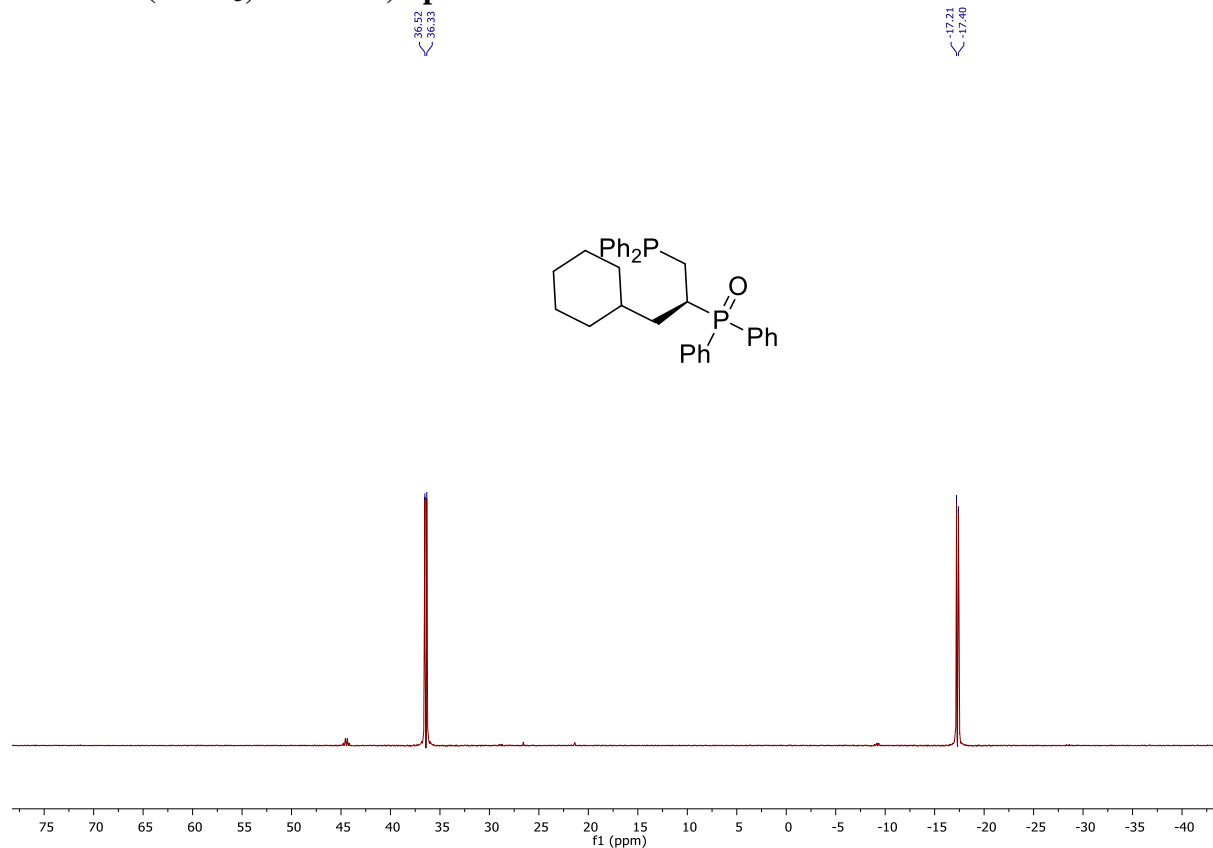

### <sup>1</sup>H NMR (CDCl<sub>3</sub>, 400 MHz) Spectrum of 3sa

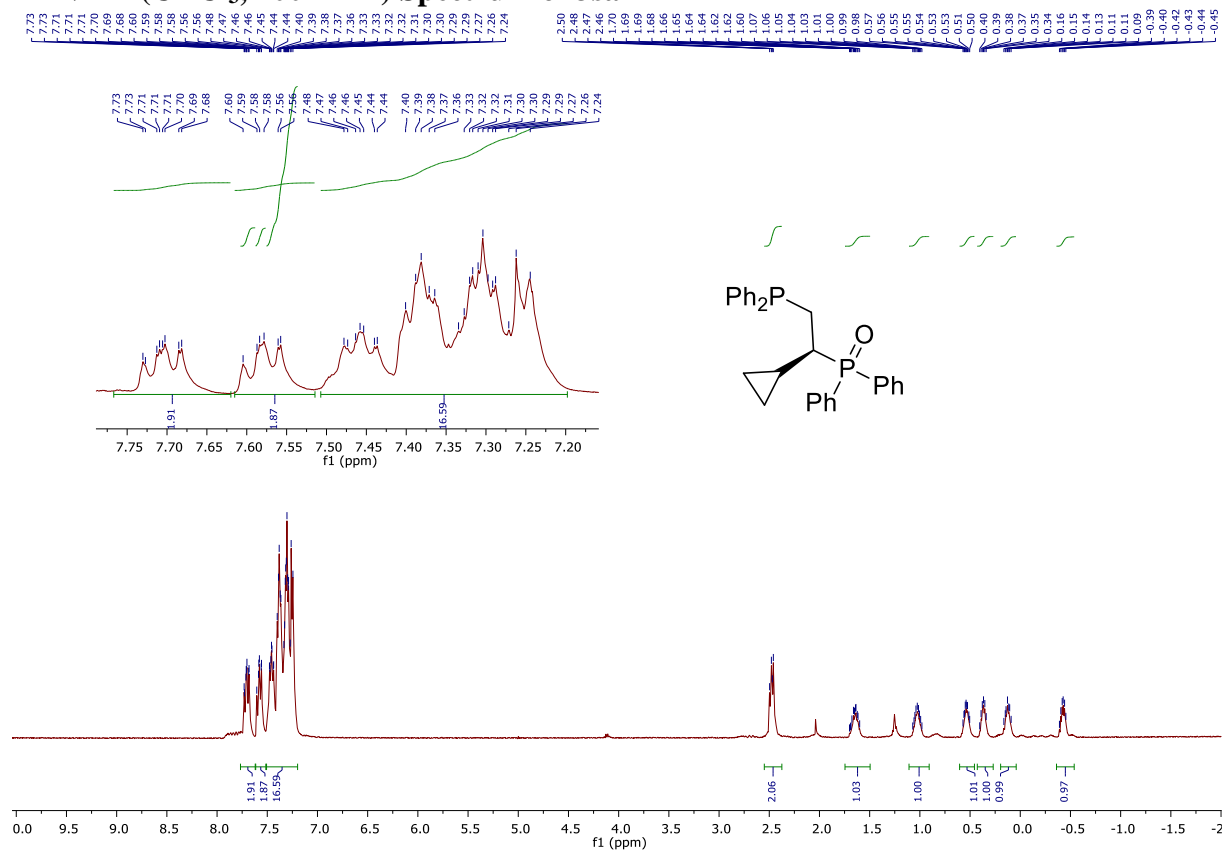

### <sup>13</sup>C NMR (CDCl<sub>3</sub>, 101 MHz) Spectrum of 3sa

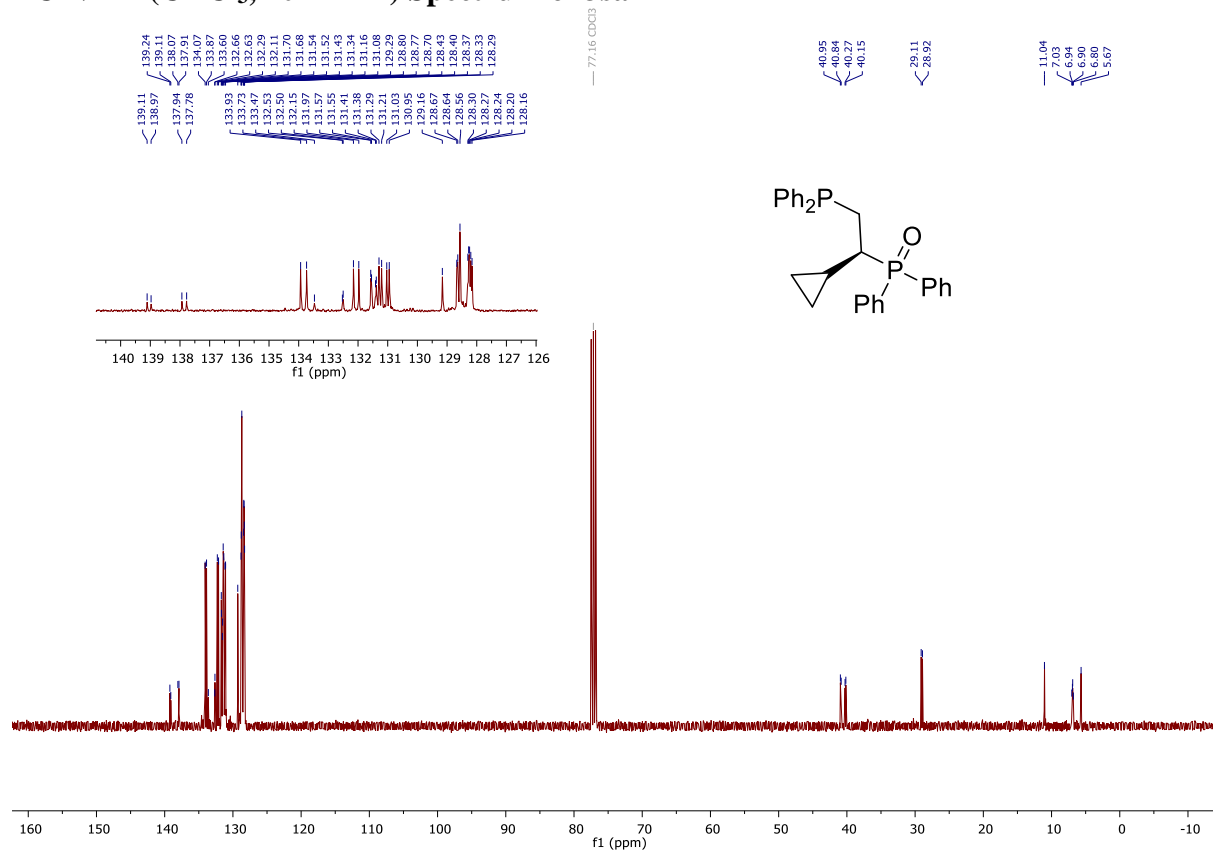

### <sup>31</sup>P NMR (CDCl<sub>3</sub>, 162 MHz) Spectrum of 3sa

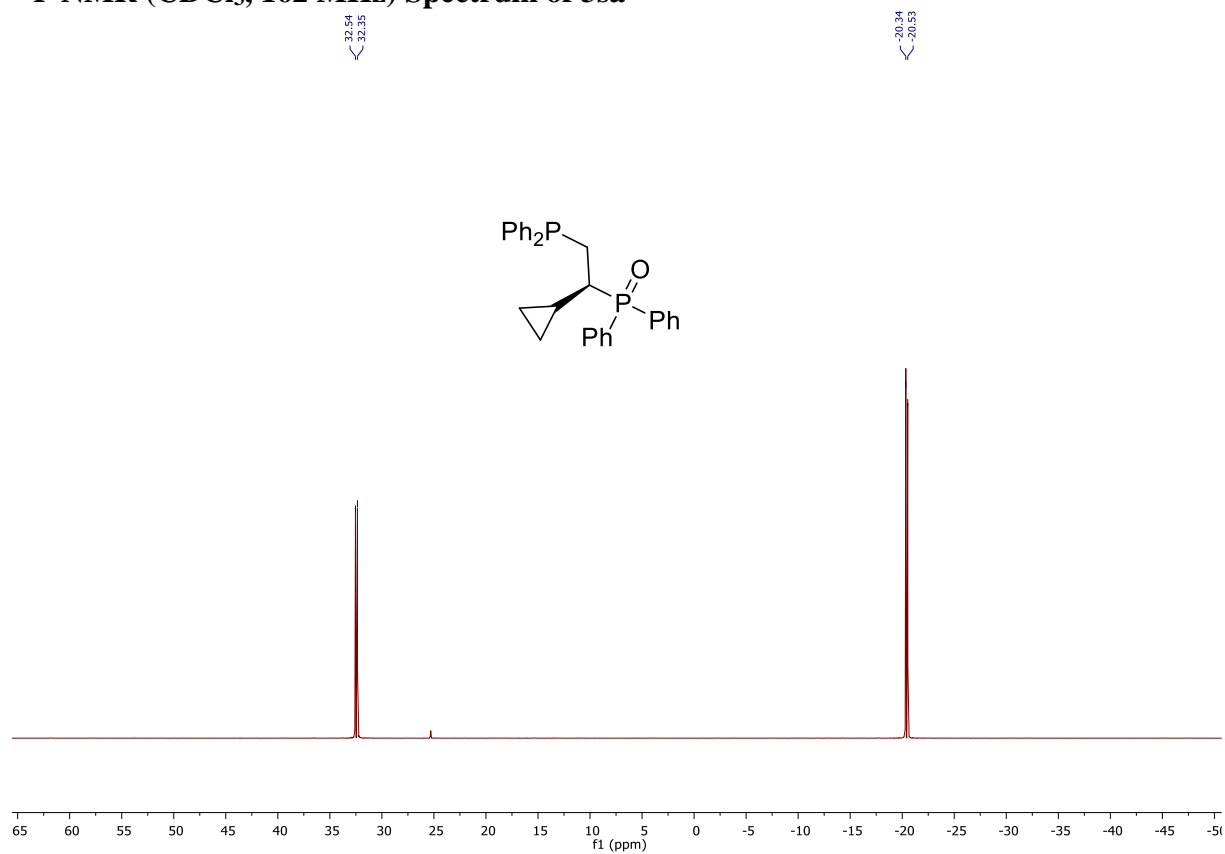



# <sup>1</sup>H NMR (CDCl<sub>3</sub>, 400 MHz) Spectrum of 3ta

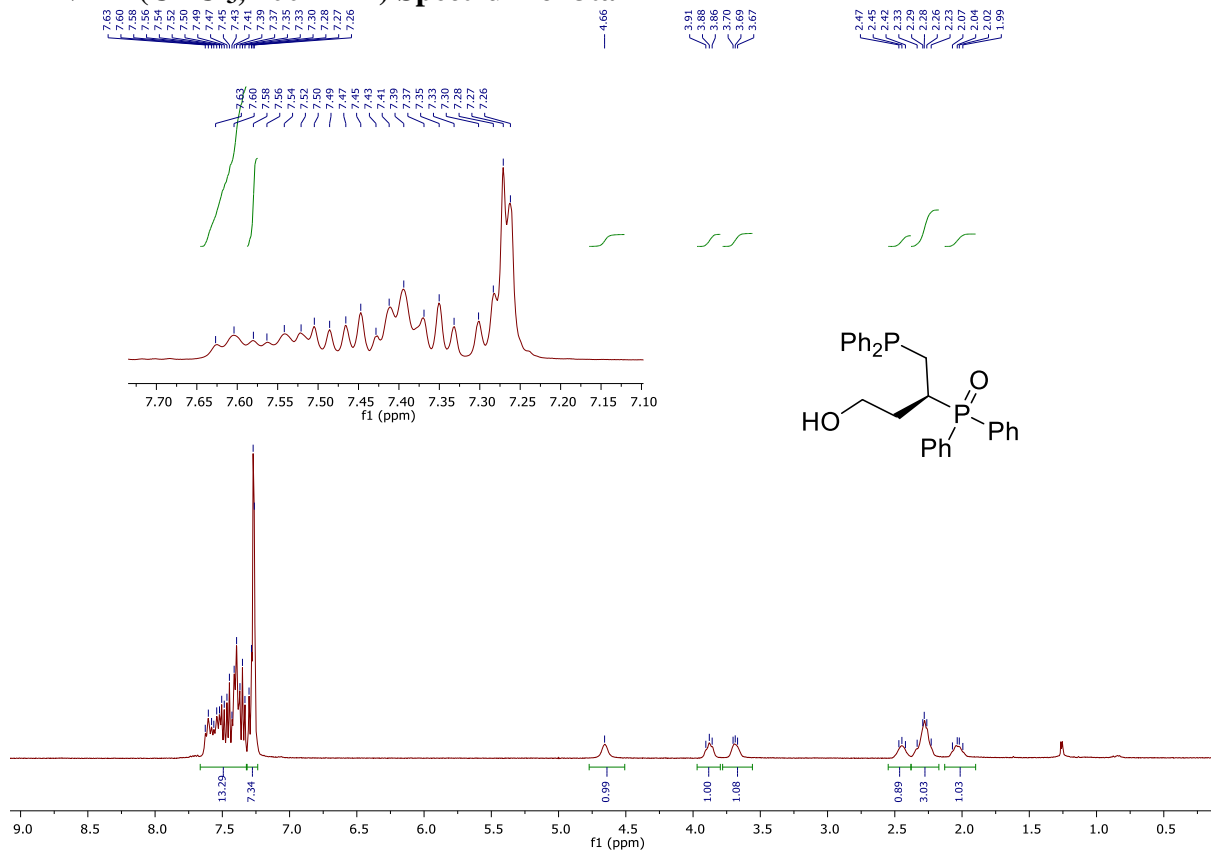

# <sup>13</sup>C NMR (CDCl<sub>3</sub>, 101 MHz) Spectrum of 3ta

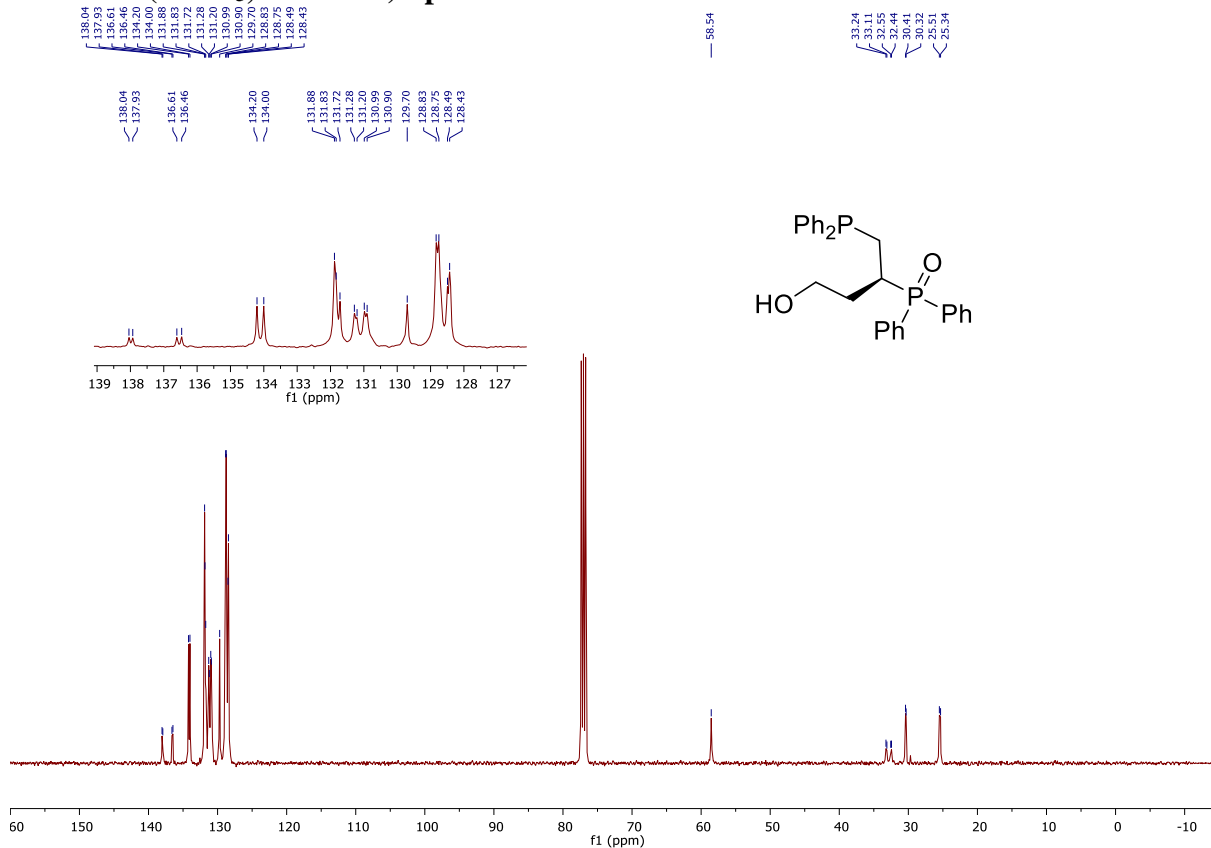

### $^{31}\text{P}$ NMR ( $\text{CDCl}_3$ , 162 MHz) Spectrum of 3ta

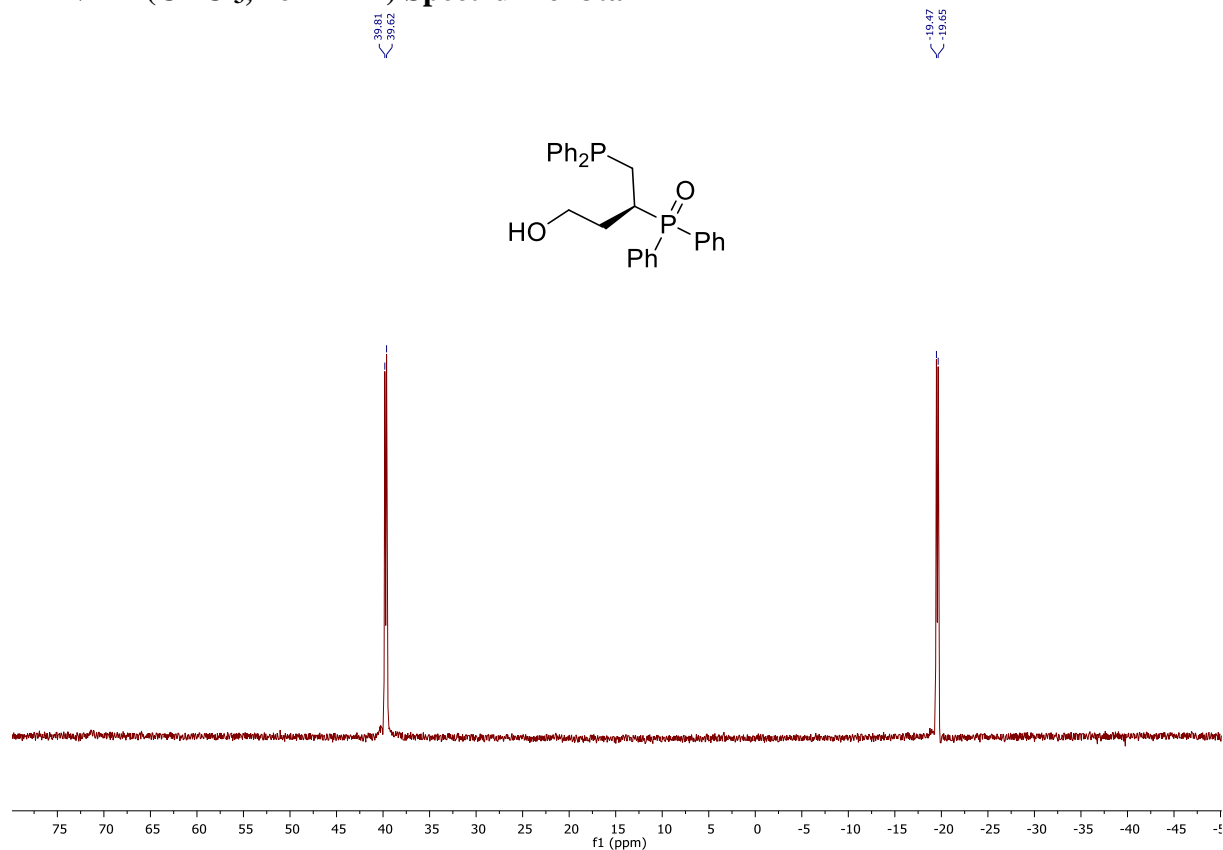

### $^1\text{H}$ NMR ( $\text{CDCl}_3$ , 400 MHz) Spectrum of 3ua

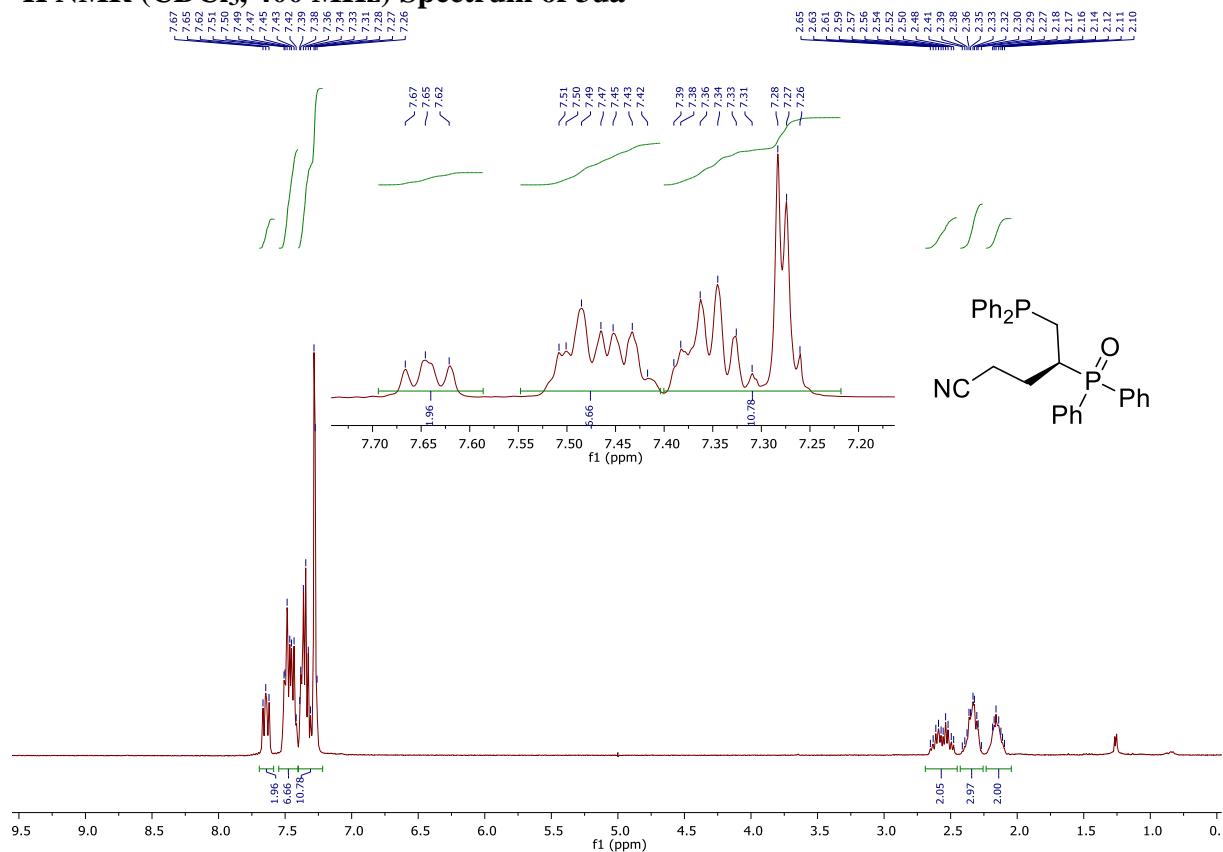

### <sup>13</sup>C NMR (CDCl<sub>3</sub>, 101 MHz) Spectrum of 3ua

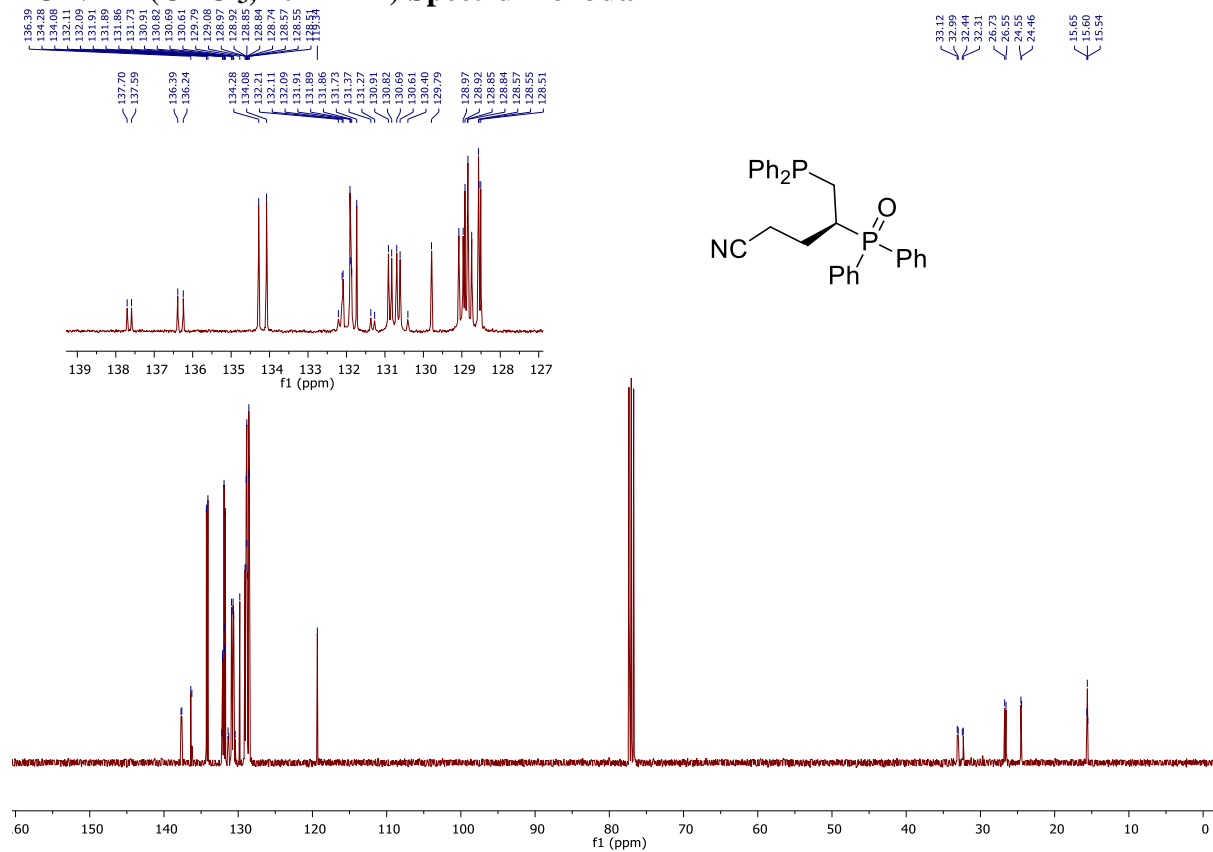

### <sup>31</sup>P NMR (CDCl<sub>3</sub>, 162 MHz) Spectrum of 3ua

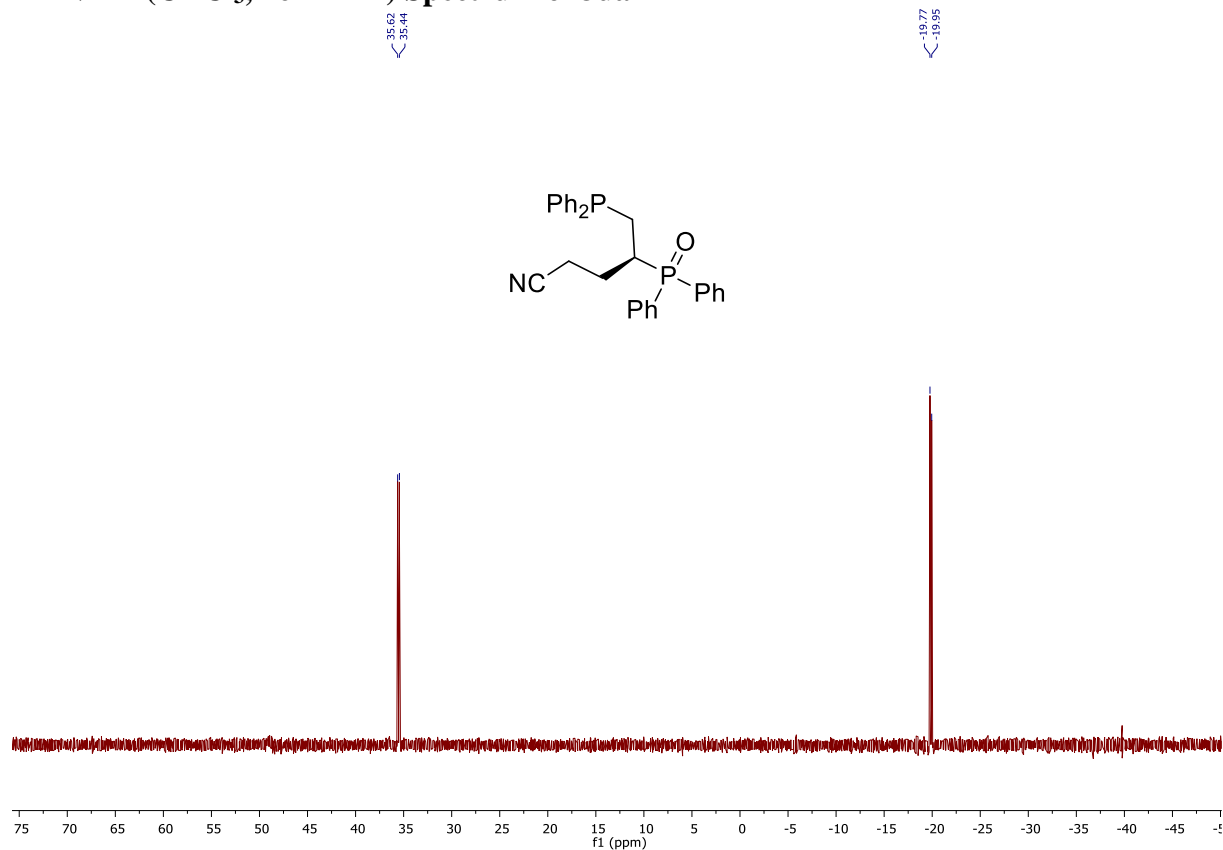

### <sup>1</sup>H NMR (CDCl<sub>3</sub>, 400 MHz) Spectrum of 3va

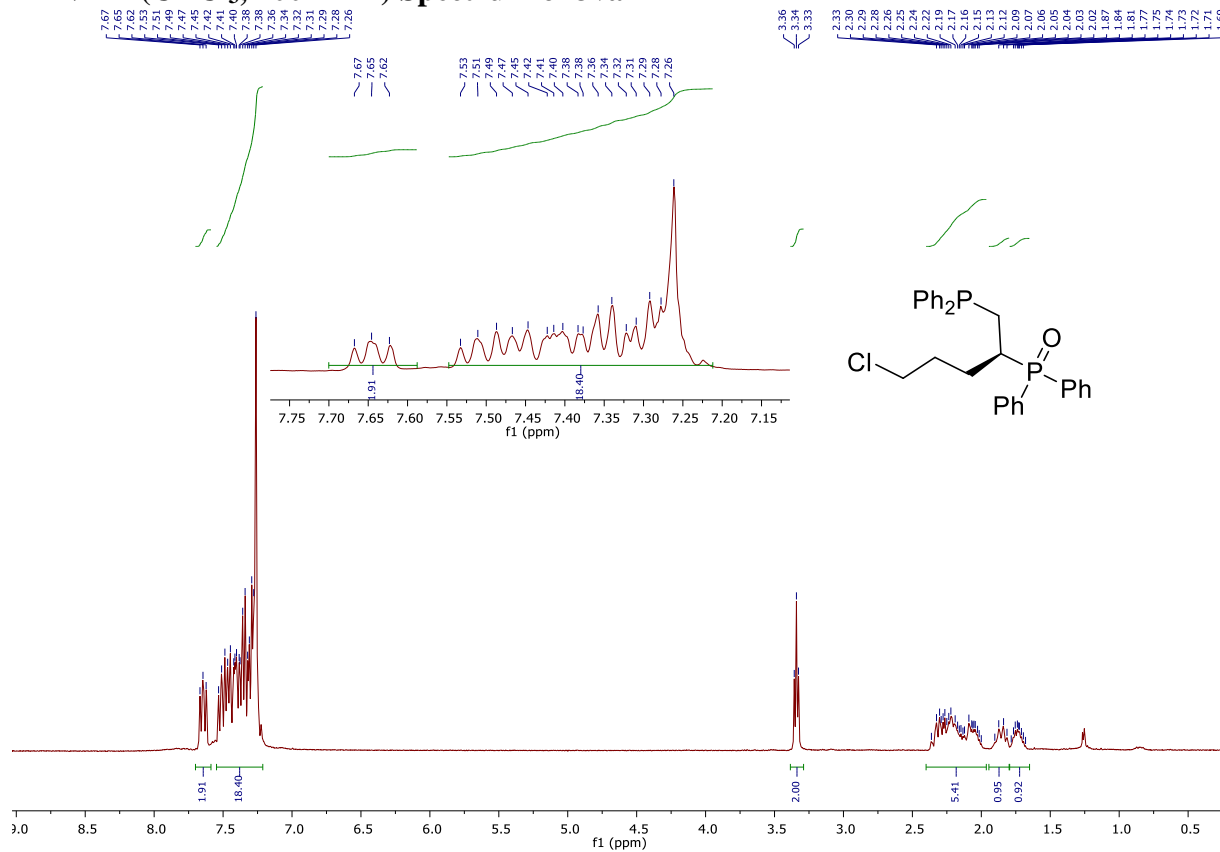

### <sup>13</sup>C NMR (CDCl<sub>3</sub>, 101 MHz) Spectrum of 3va

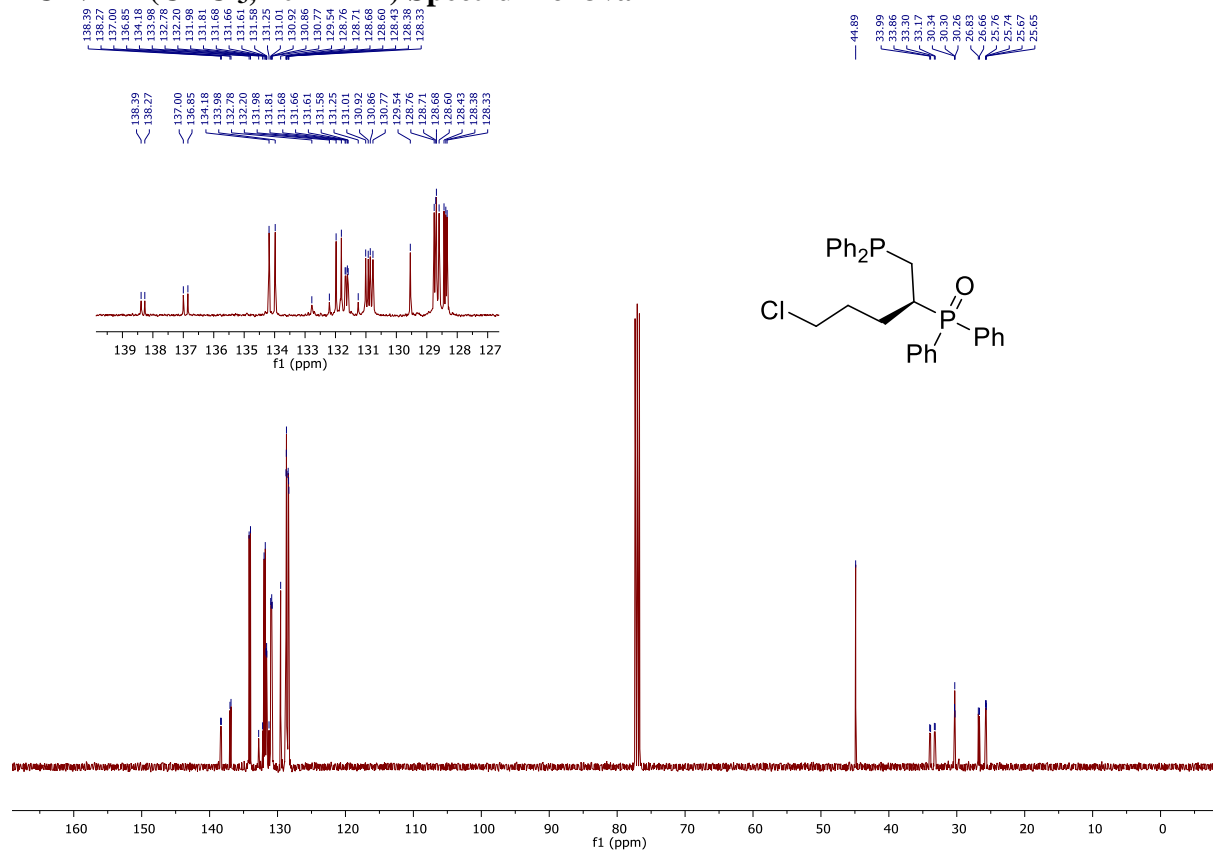

### $^{31}\text{P}$ NMR ( $\text{CDCl}_3$ , 162 MHz) Spectrum of 3va

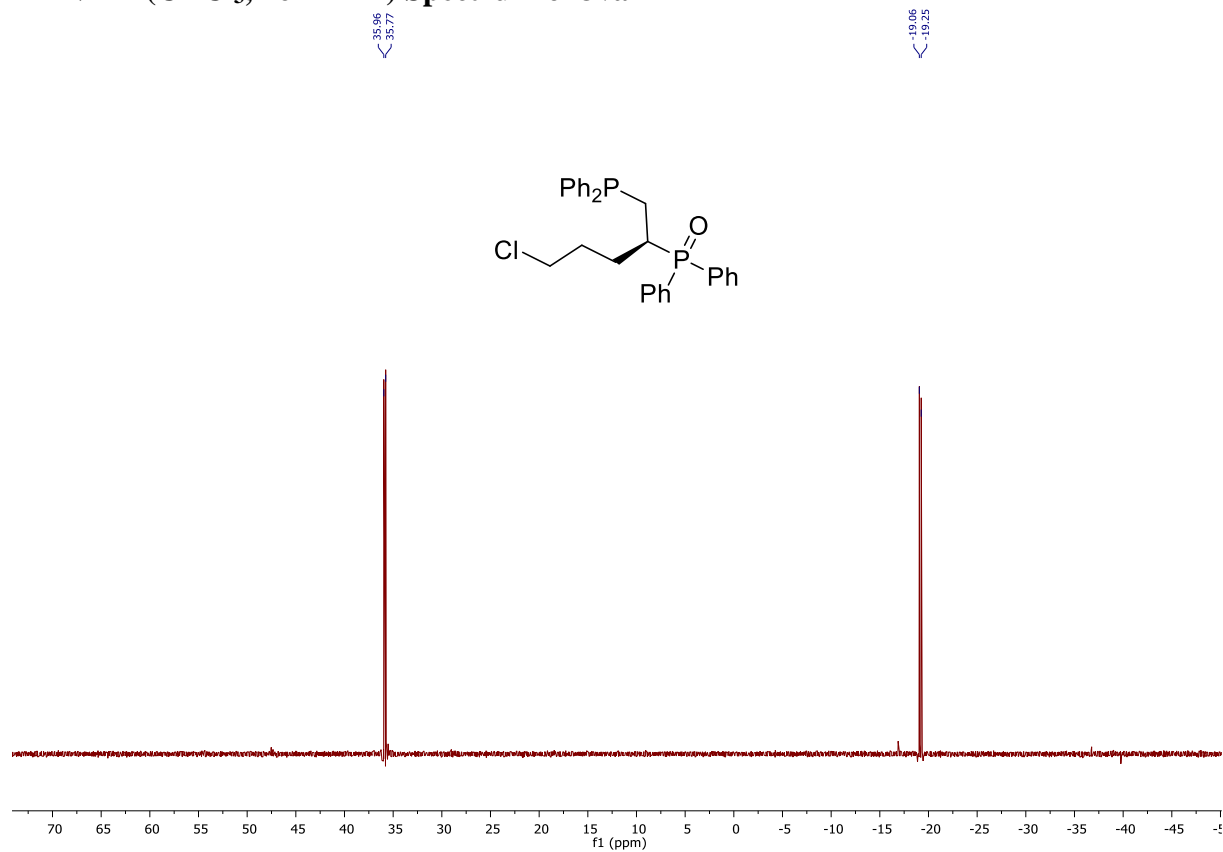

### $^1\text{H}$ NMR ( $\text{CDCl}_3$ , 400 MHz) Spectrum of 3wa

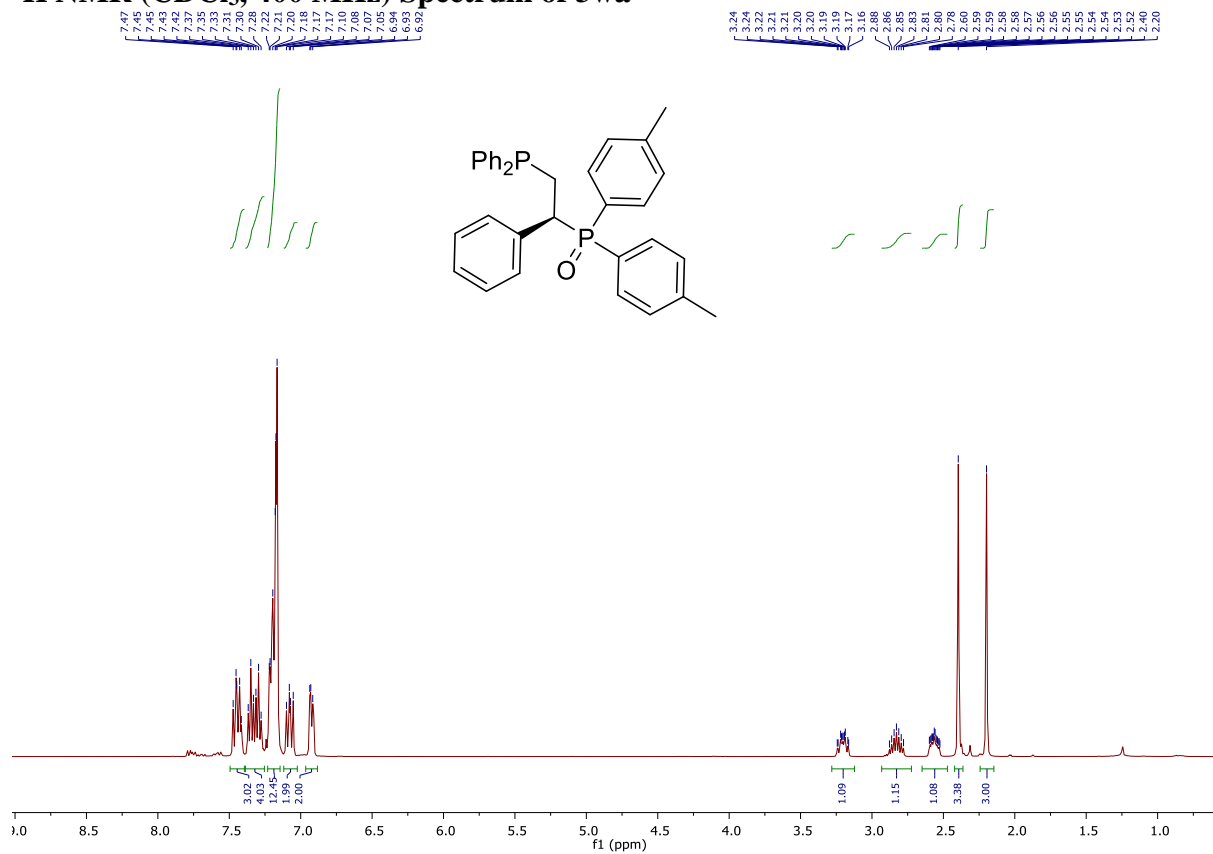

### <sup>13</sup>C NMR (CDCl<sub>3</sub>, 101 MHz) Spectrum of 3wa

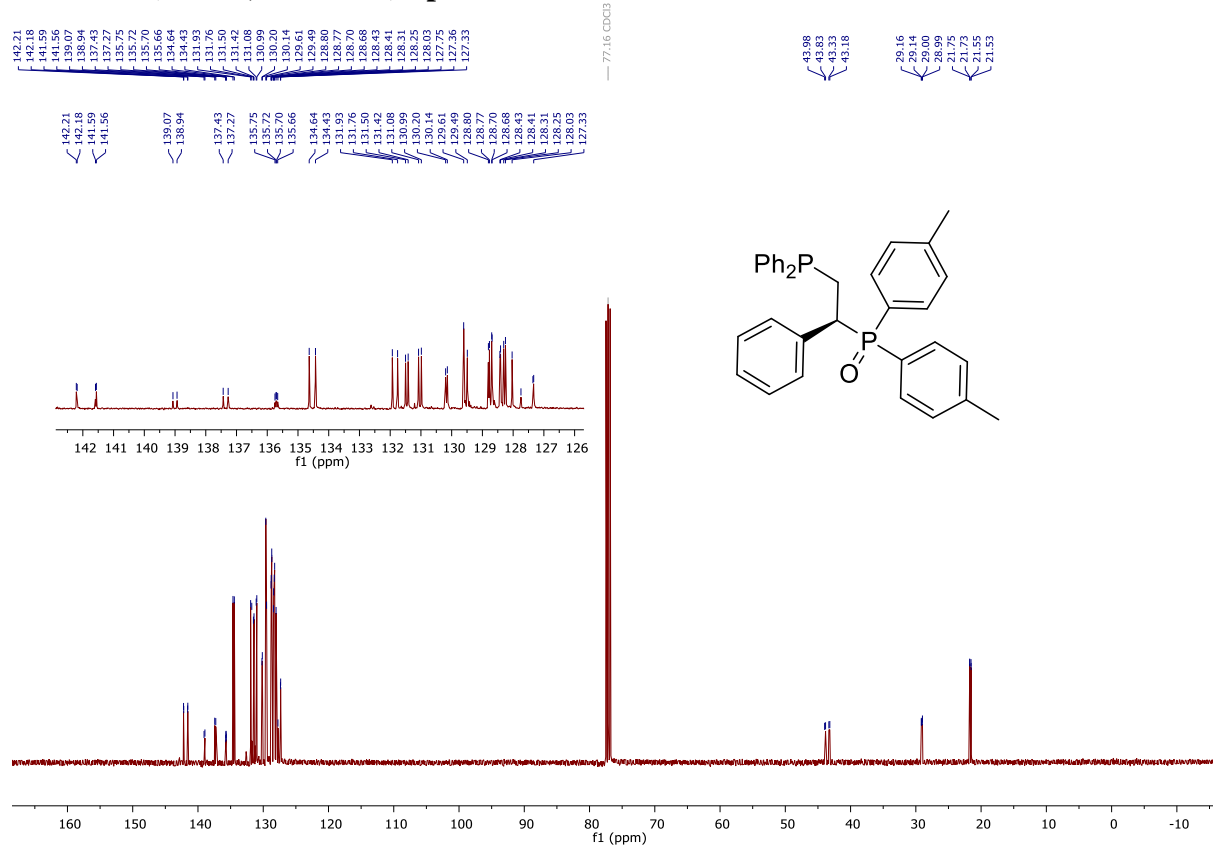

### <sup>31</sup>P NMR (CDCl<sub>3</sub>, 162 MHz) Spectrum of 3wa

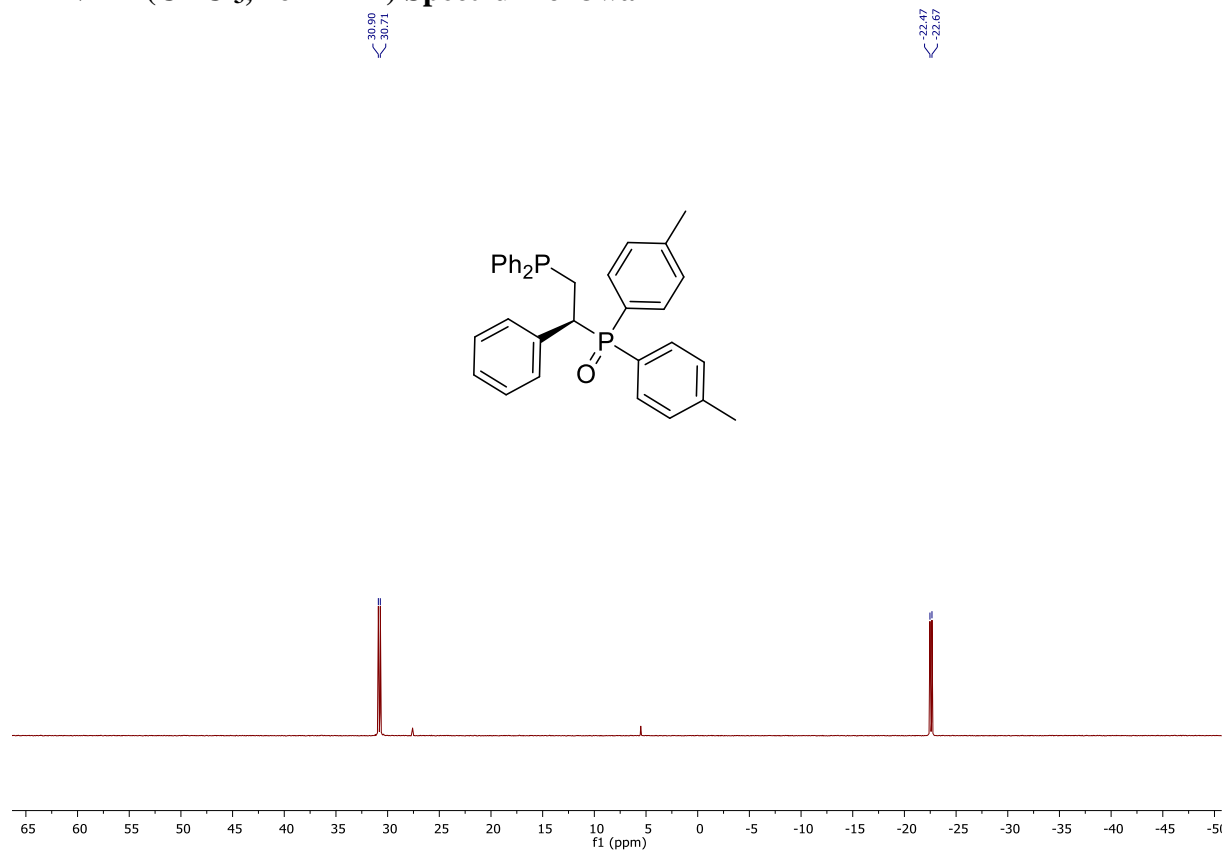



### $^{31}\text{P}$ NMR ( $\text{CDCl}_3$ , 162 MHz) Spectrum of 3xa

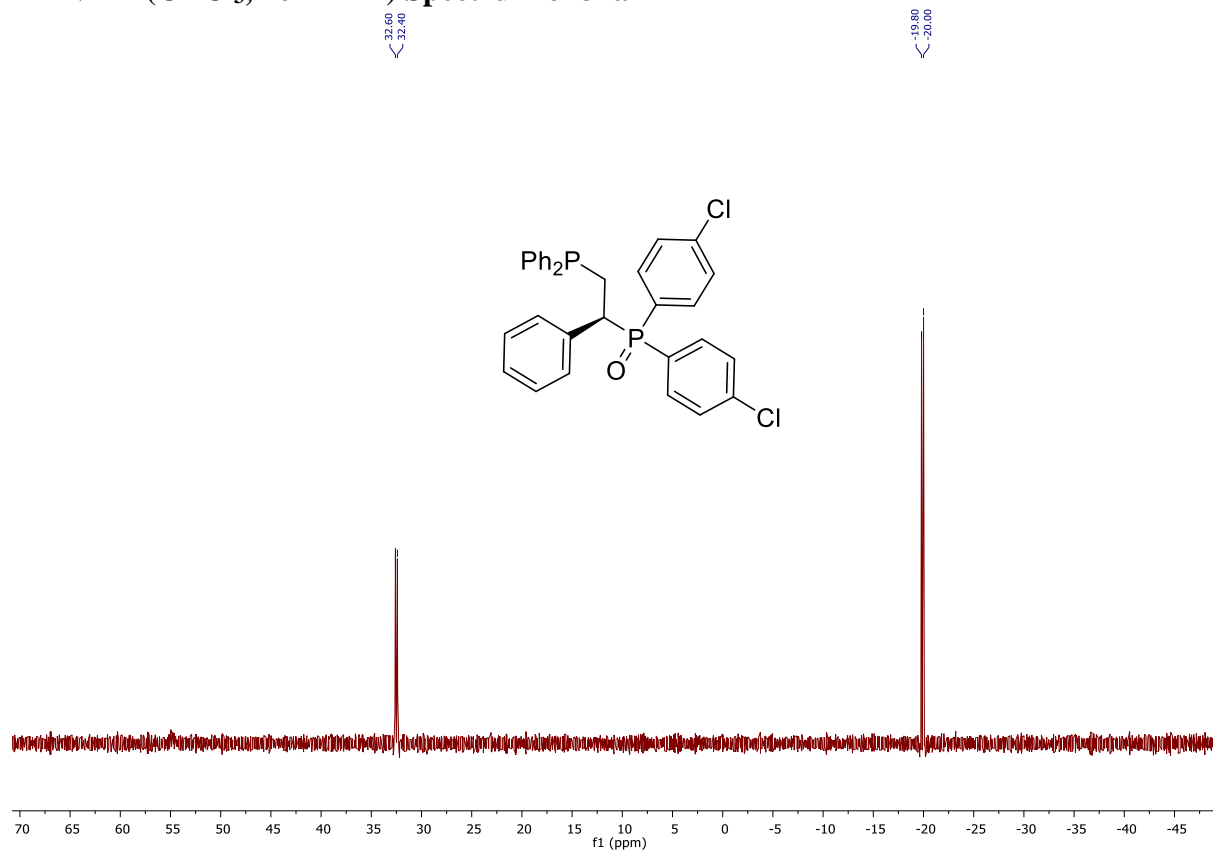

### $^1\text{H}$ NMR ( $\text{CDCl}_3$ , 400 MHz) Spectrum of 3ya

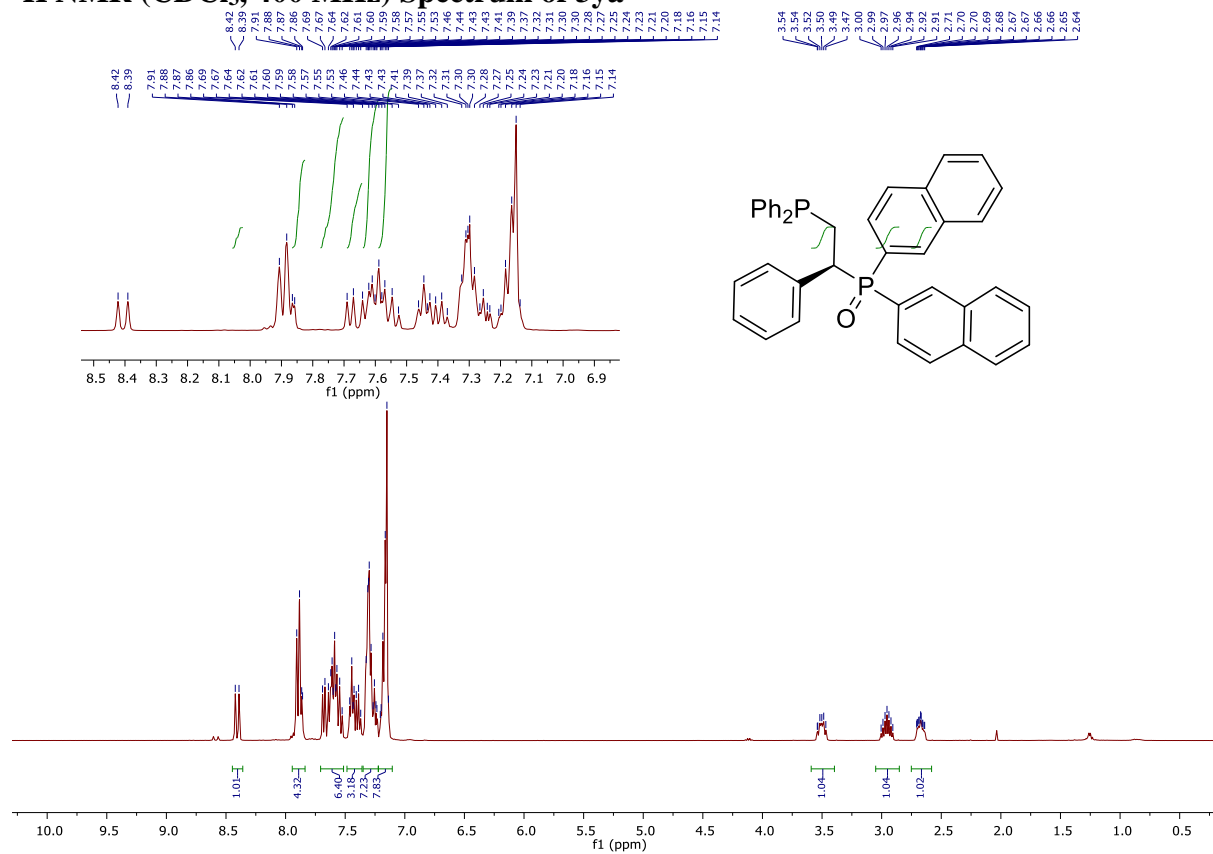



### $^{13}\text{C}$ NMR ( $\text{CDCl}_3$ , 101 MHz) Spectrum of 3ya

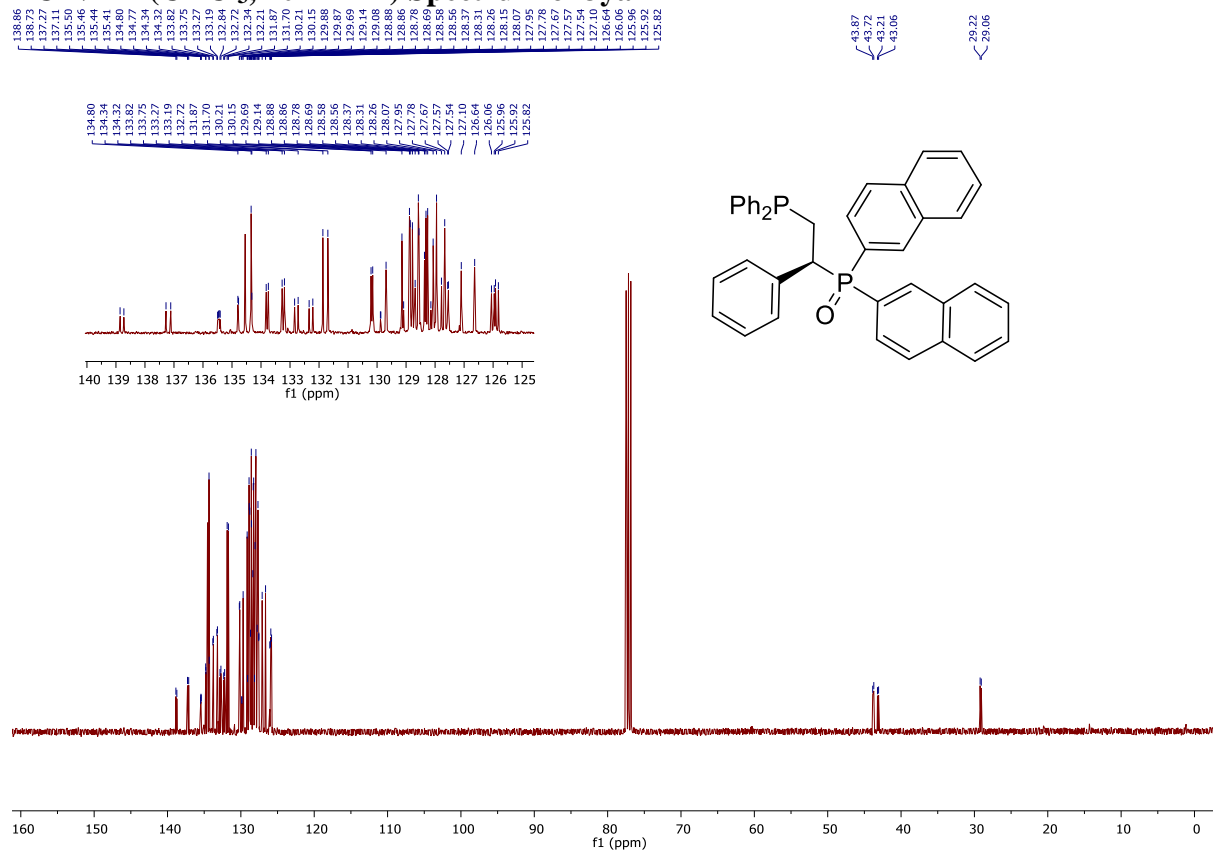

### $^{31}\text{P}$ NMR ( $\text{CDCl}_3$ , 162 MHz) Spectrum of 3ya

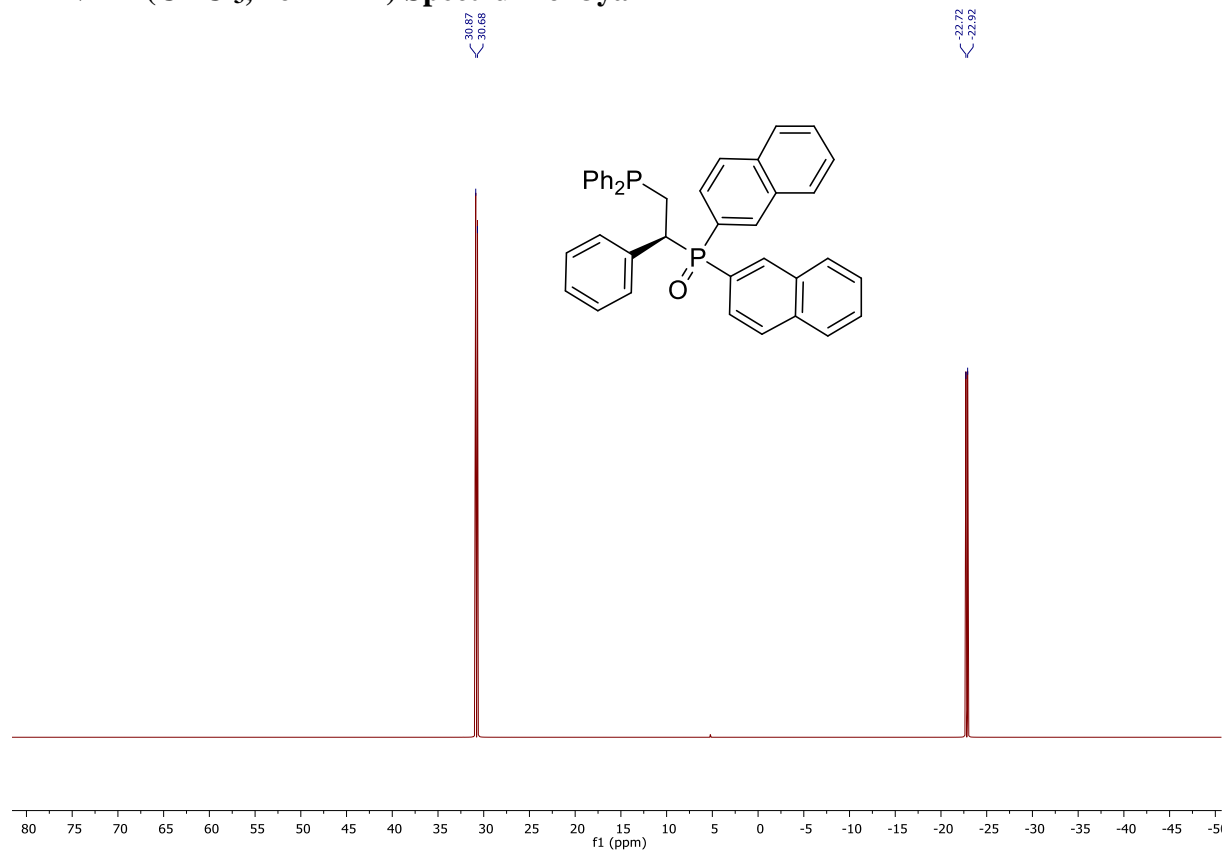

# <sup>1</sup>H NMR (CDCl<sub>3</sub>, 400 MHz) Spectrum of 3za

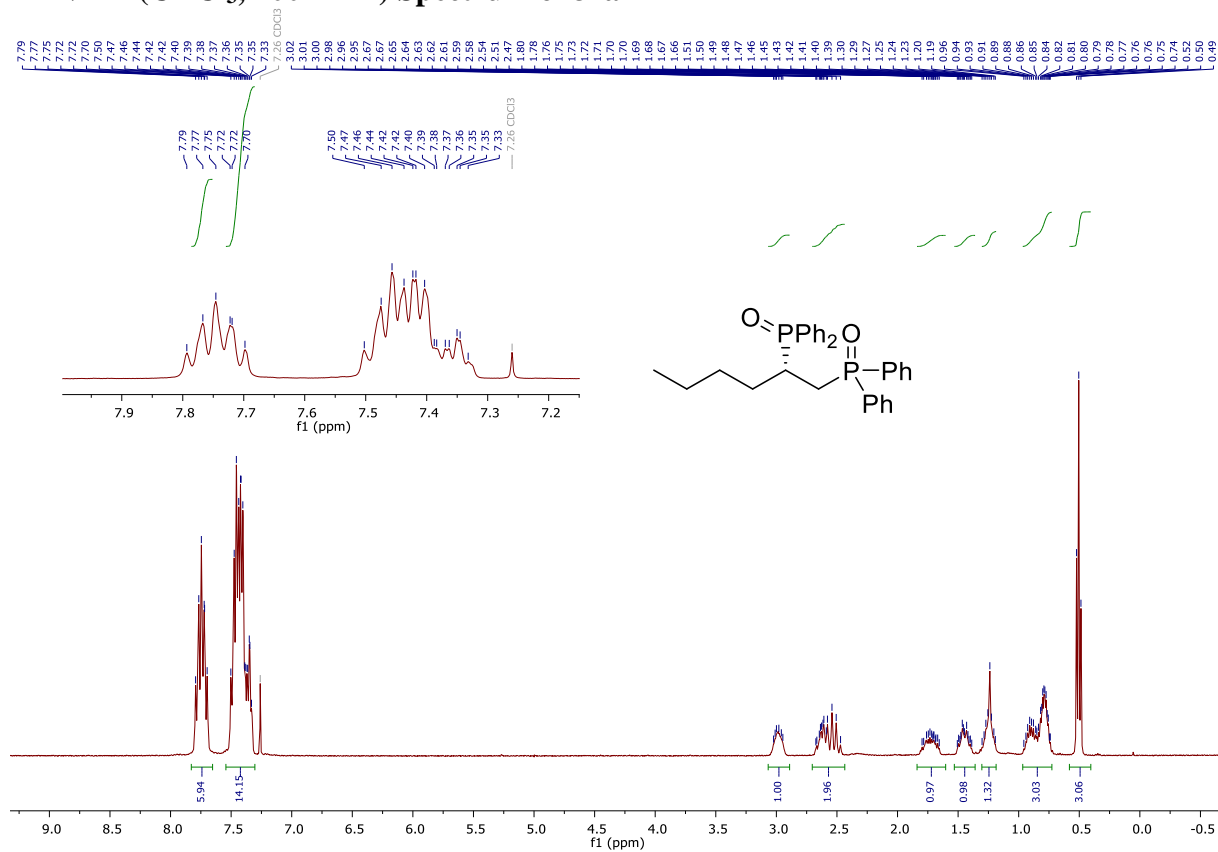

# <sup>13</sup>C NMR (CDCl<sub>3</sub>, 101 MHz) Spectrum of 3za

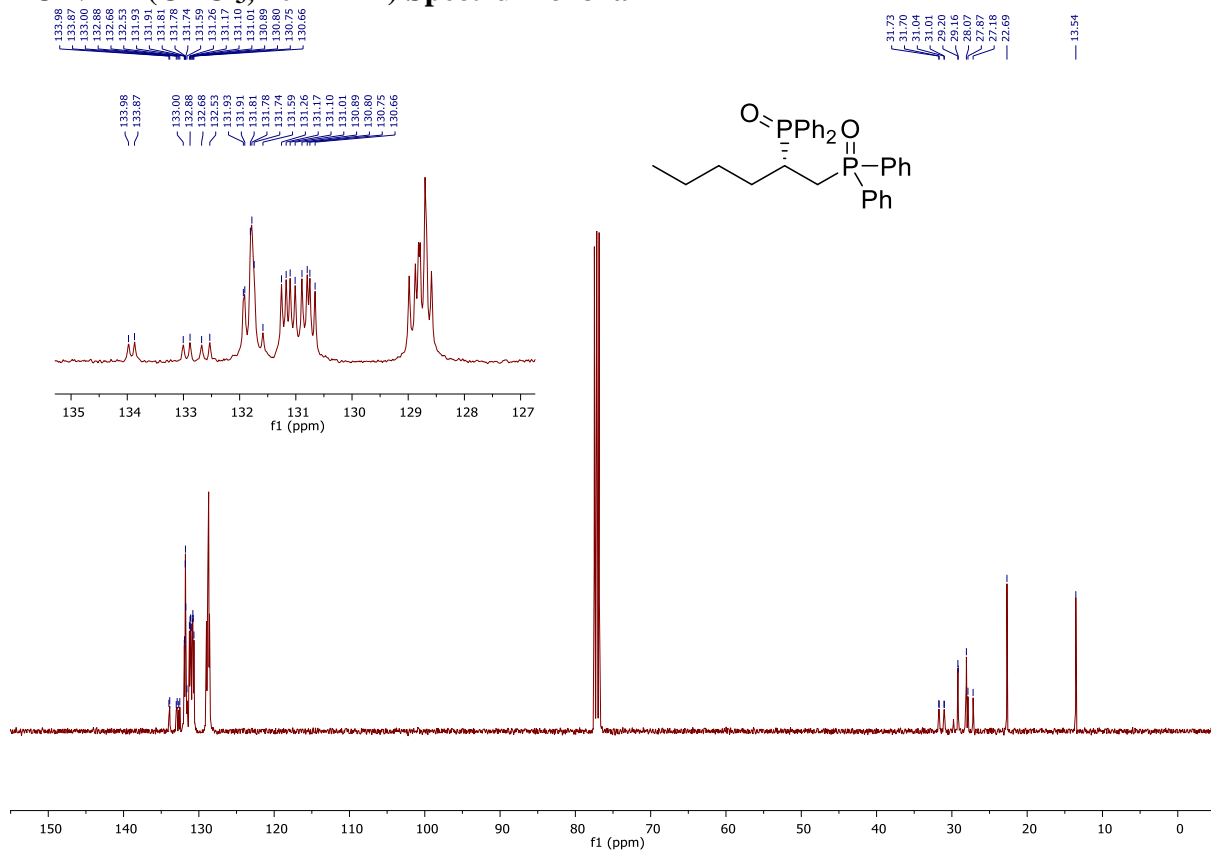

### <sup>31</sup>P NMR (CDCl<sub>3</sub>, 162 MHz) Spectrum of 3za

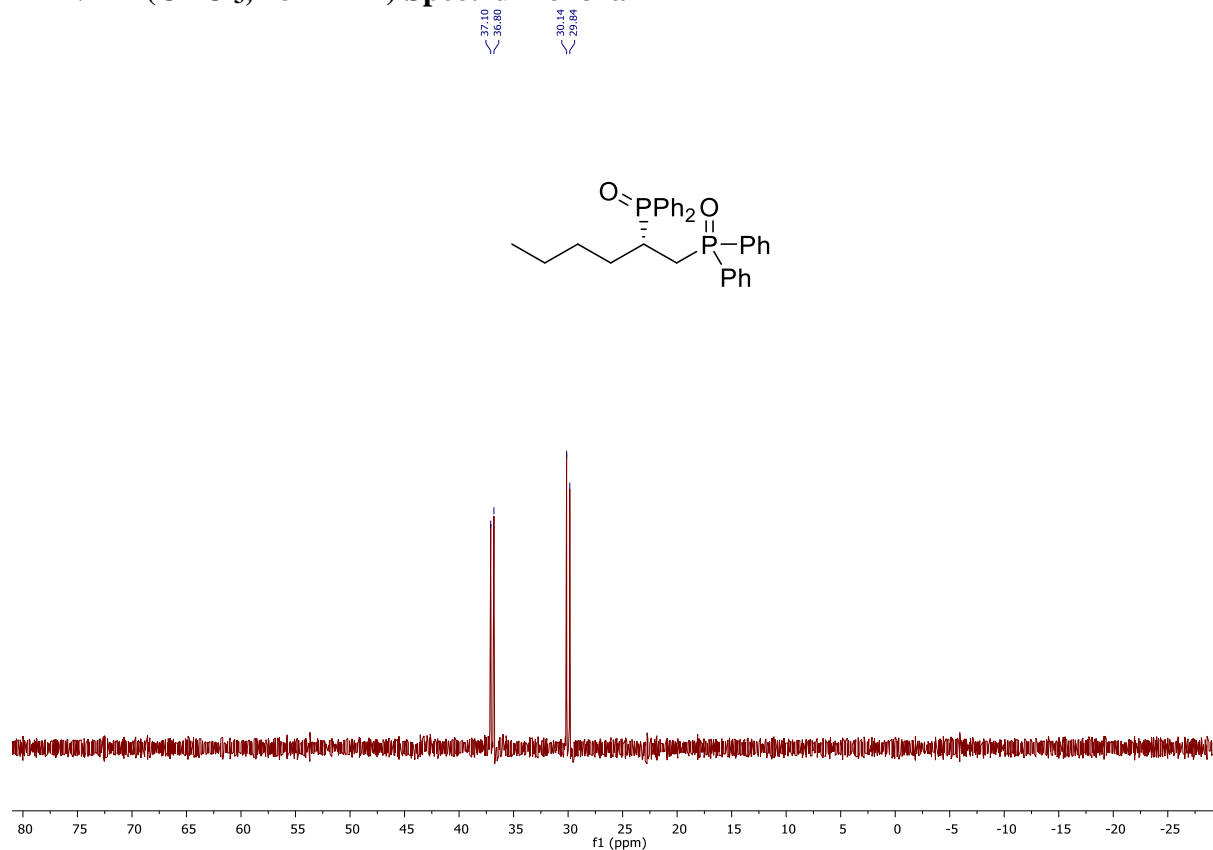

### <sup>1</sup>H NMR (CDCl<sub>3</sub>, 400 MHz) Spectrum of 4a'a

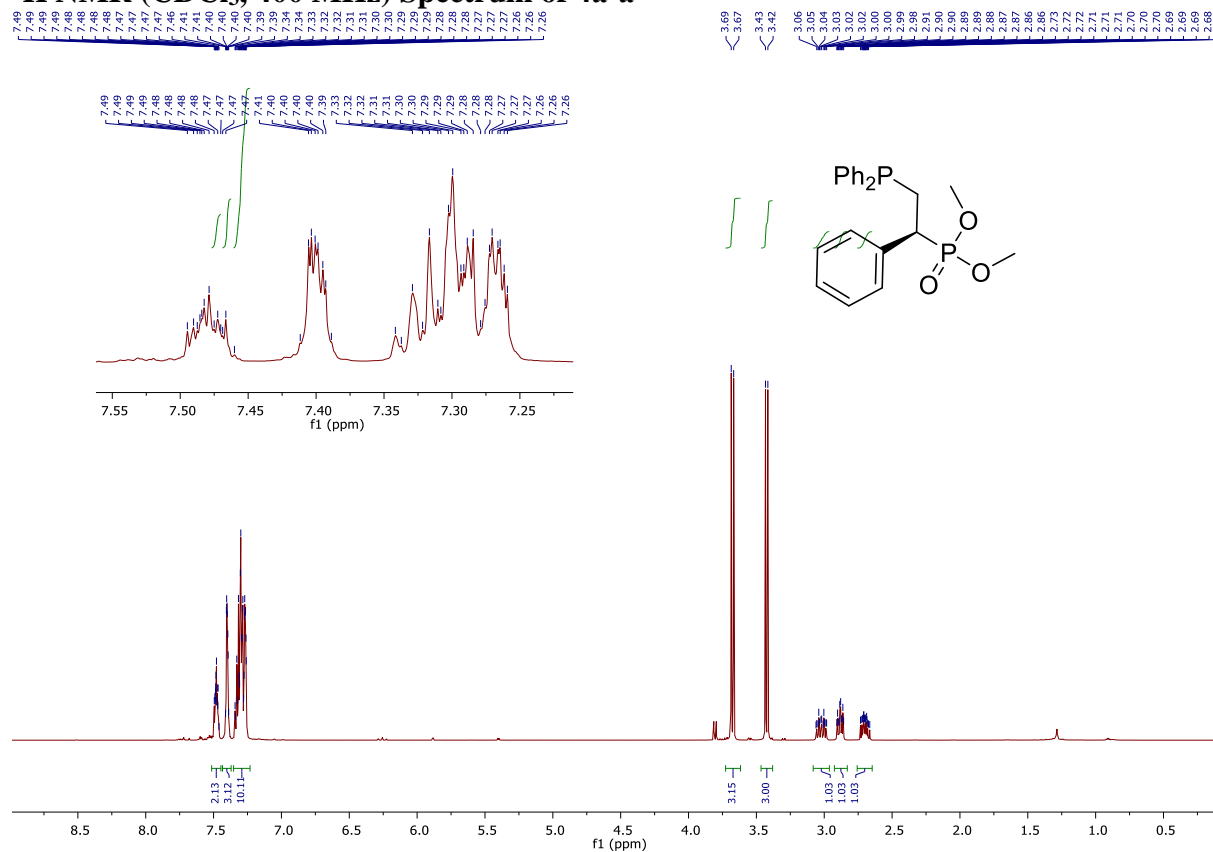

### $^{13}\text{C}$ NMR ( $\text{CDCl}_3$ , 101 MHz) Spectrum of 4a'a

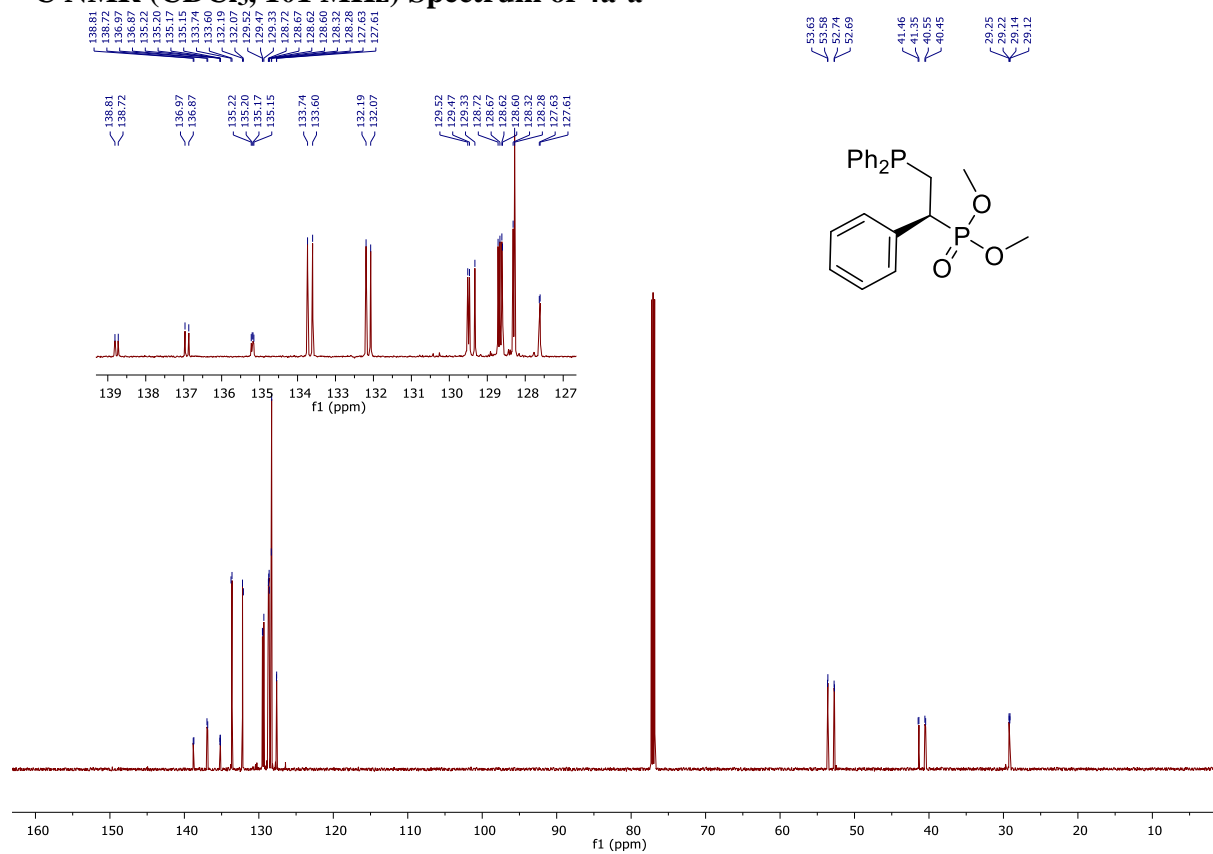

### $^{31}\text{P}$ NMR ( $\text{CDCl}_3$ , 162 MHz) Spectrum of 4a'a

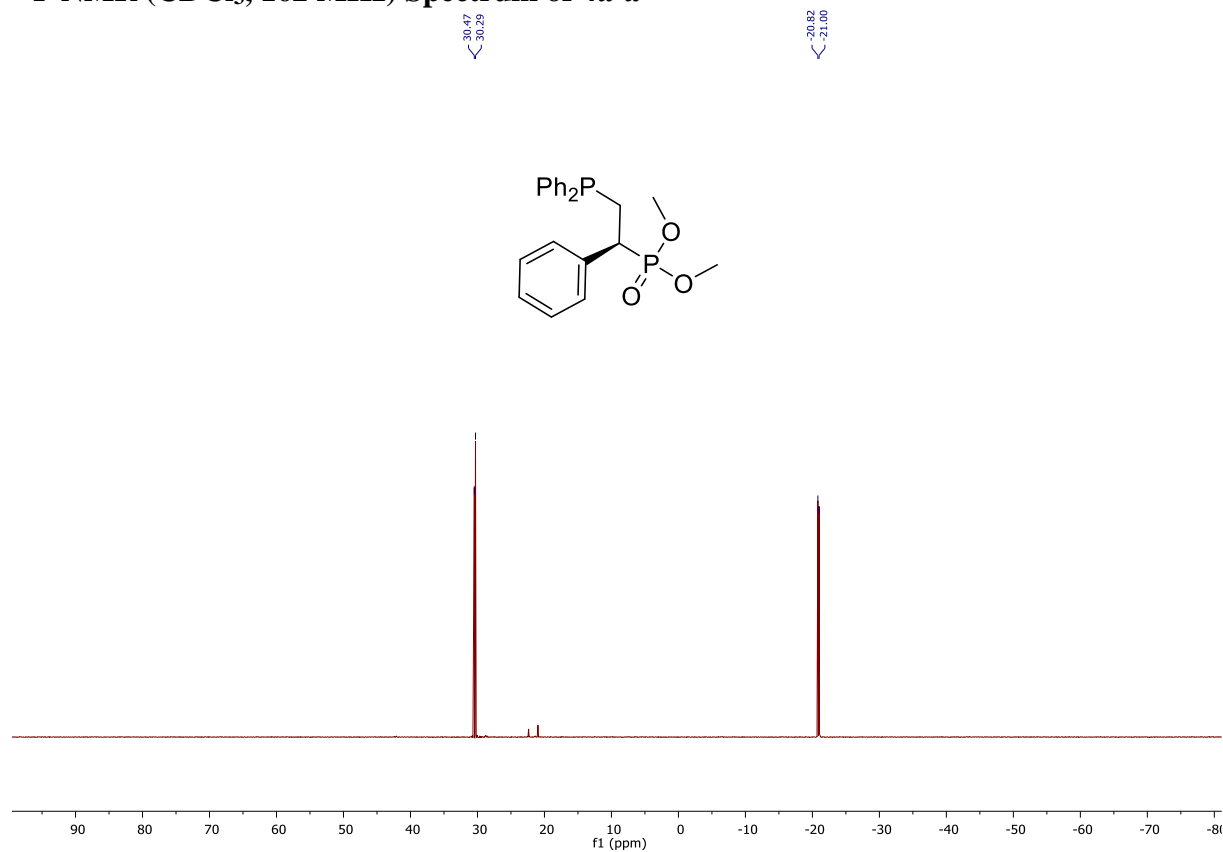

### $^1\text{H}$ NMR ( $\text{CDCl}_3$ , 400 MHz) Spectrum of 4b'a

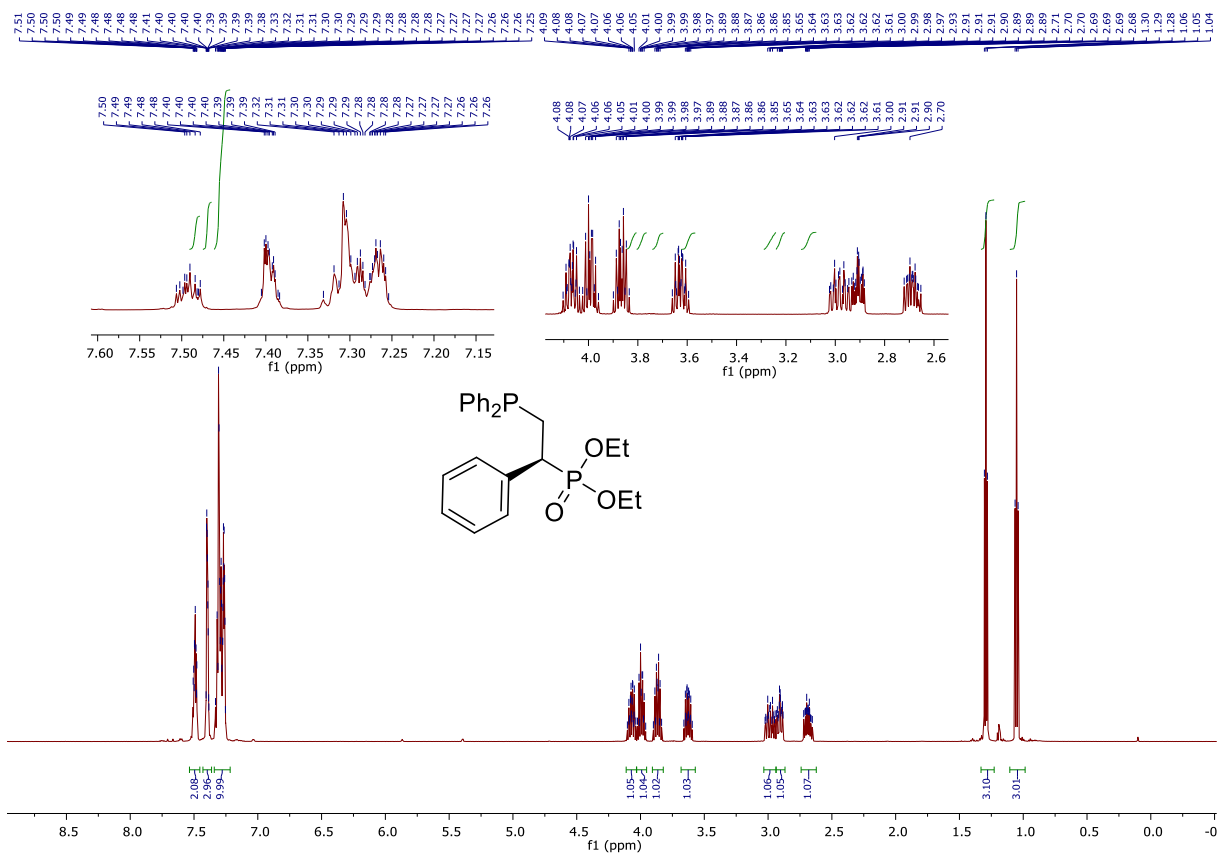

**<sup>13</sup>C NMR (CDCl<sub>3</sub>, 101 MHz) Spectrum of 4b'a**

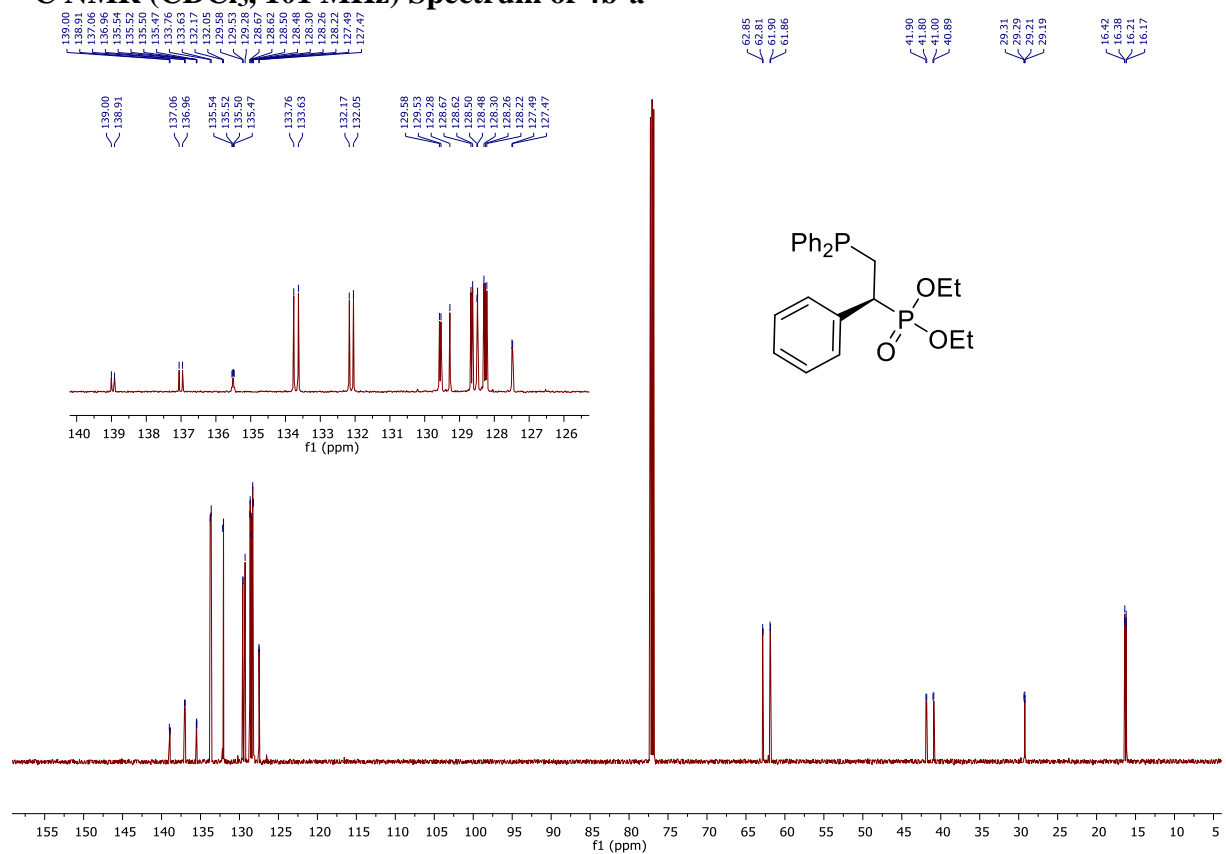

**<sup>31</sup>P NMR (CDCl<sub>3</sub>, 162 MHz) Spectrum of 4b'a**

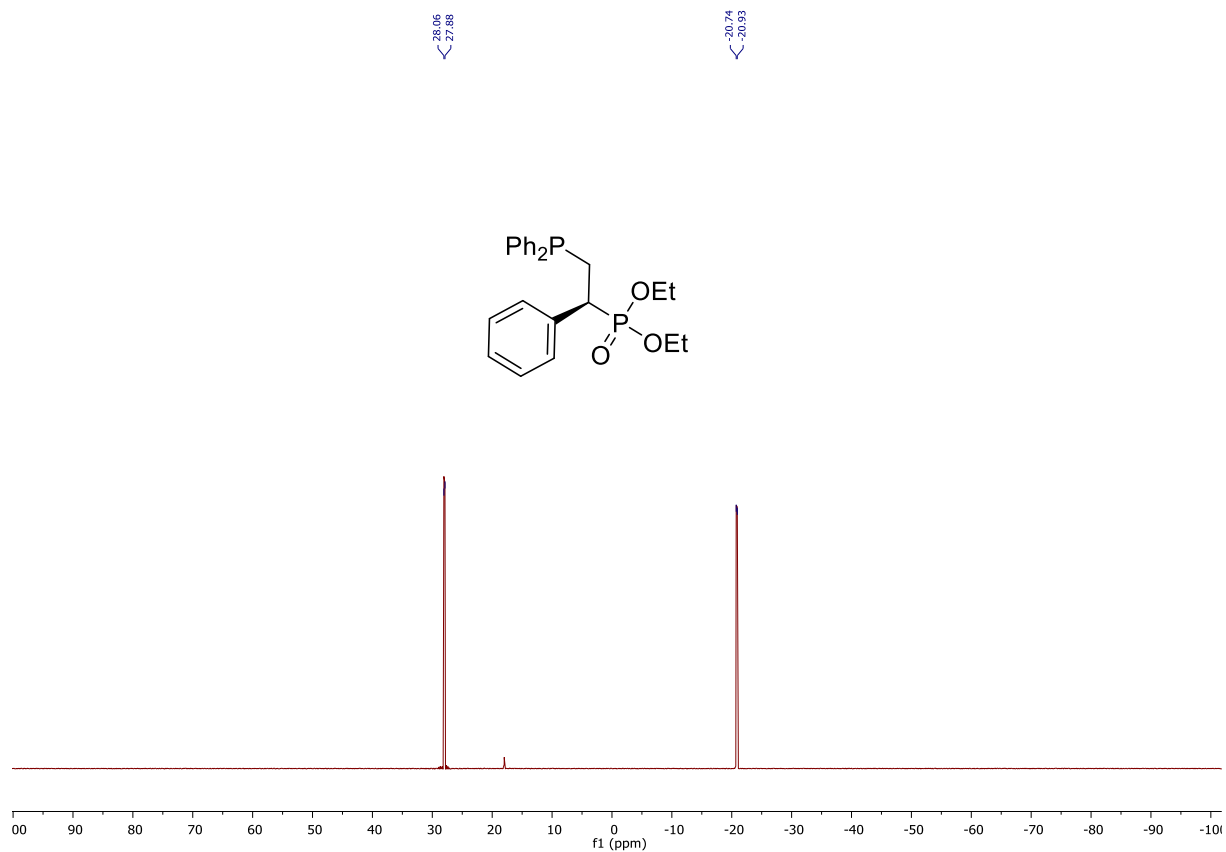

**<sup>1</sup>H NMR (CDCl<sub>3</sub>, 400 MHz) Spectrum of 4c'a**

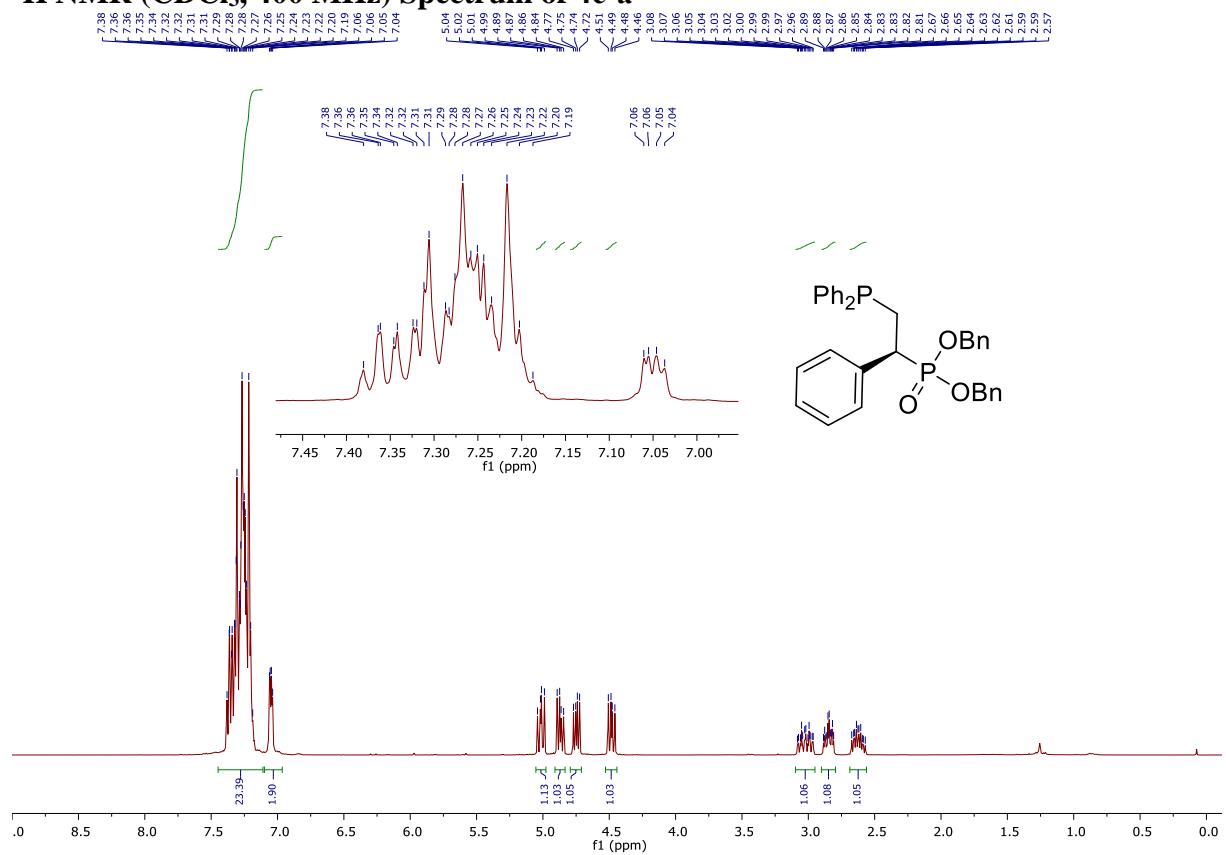

**<sup>13</sup>C NMR (CDCl<sub>3</sub>, 101 MHz) Spectrum of 4c'a**

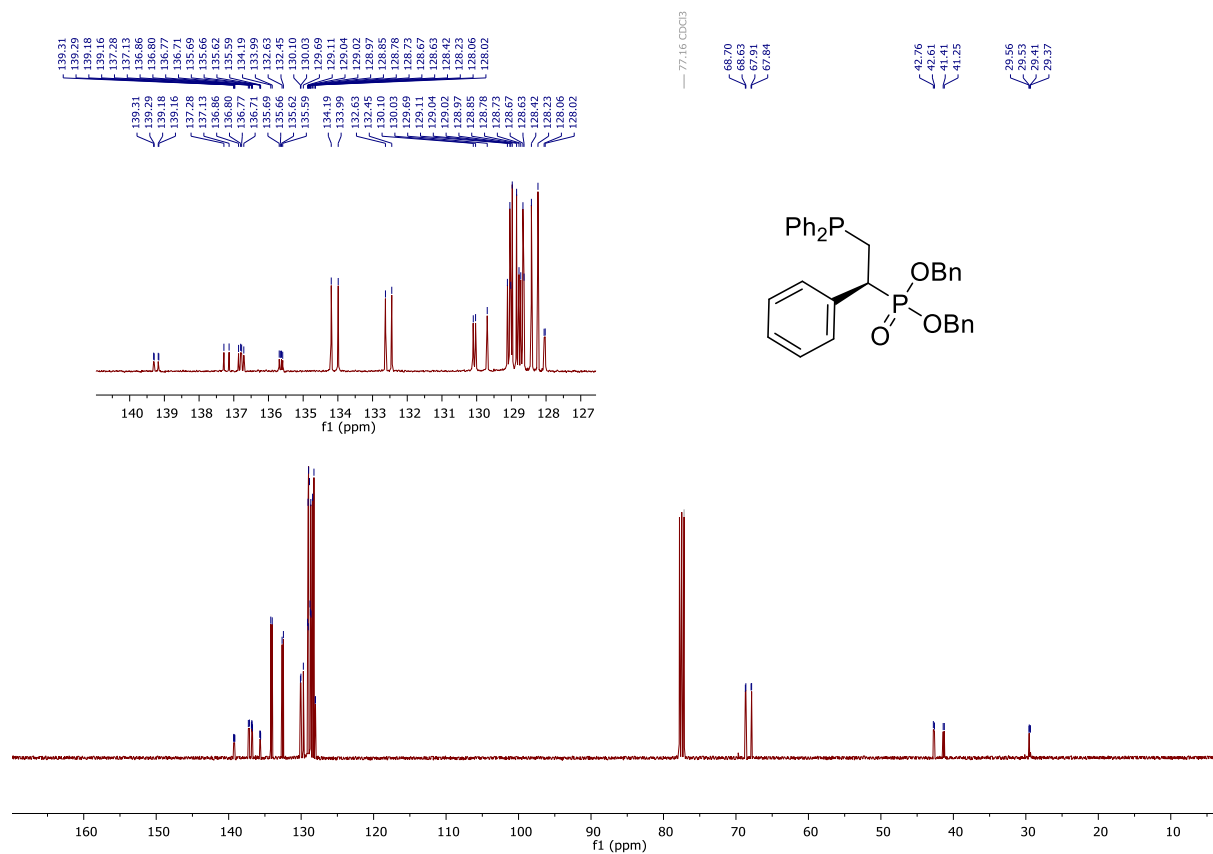

**<sup>31</sup>P NMR (CDCl<sub>3</sub>, 162 MHz) Spectrum of 4c'a**

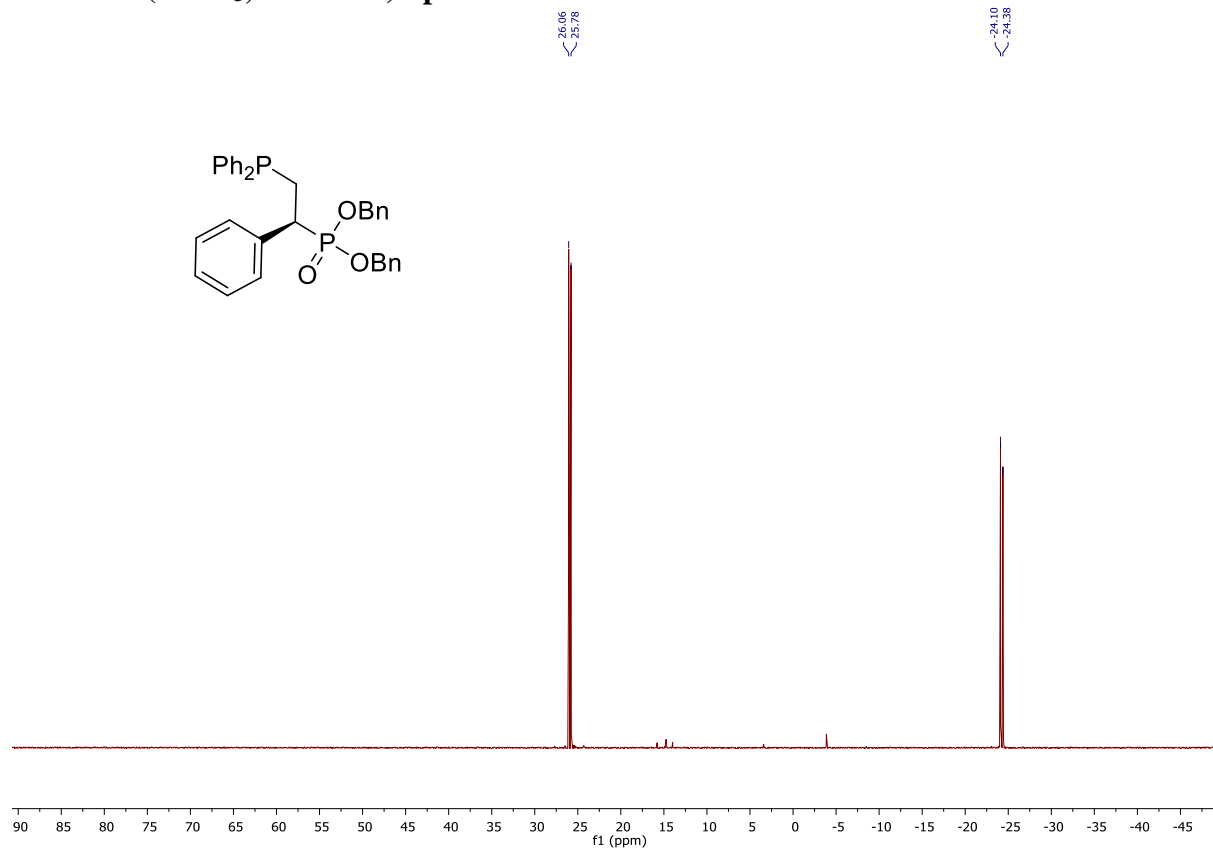

**<sup>1</sup>H NMR (CDCl<sub>3</sub>, 400 MHz) Spectrum of 4d'a**

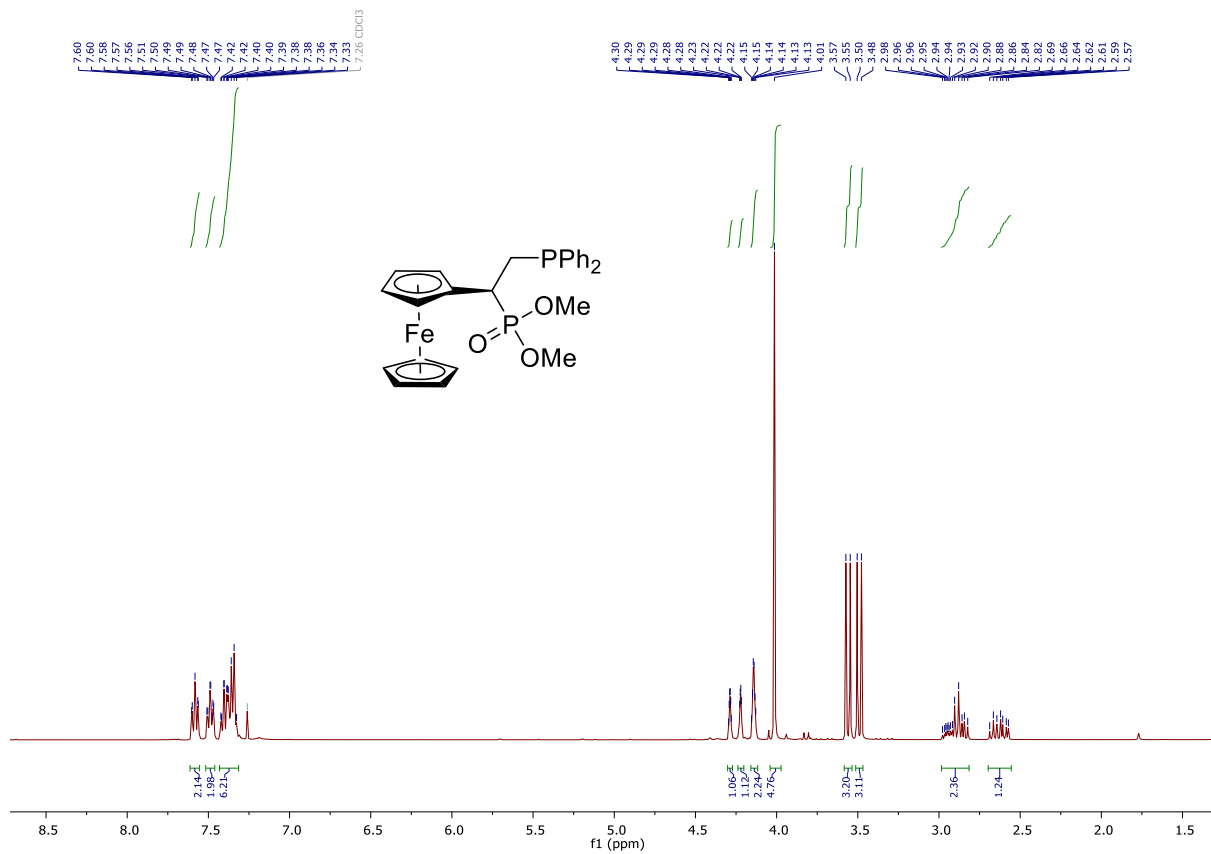



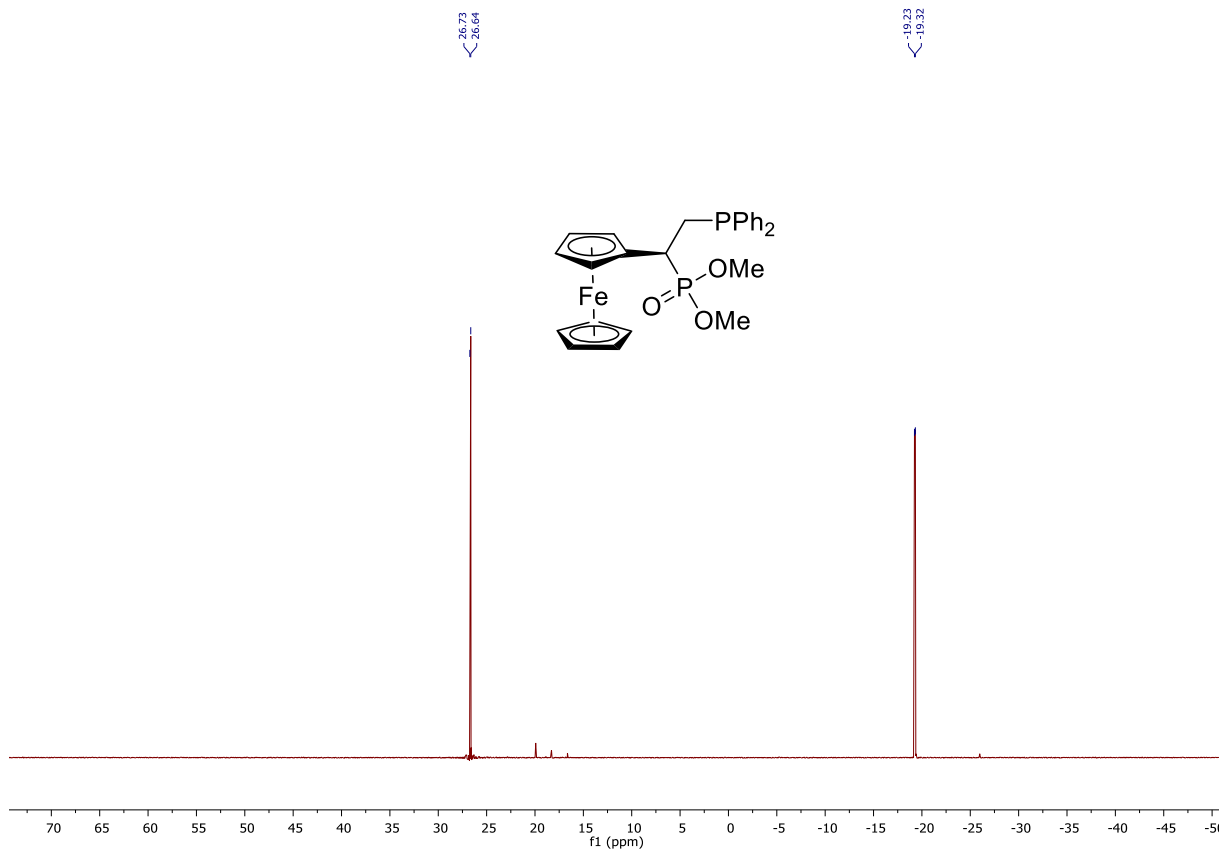

**$^1\text{H}$  NMR (CDCl<sub>3</sub>, 400 MHz) Spectrum of 4e'a**

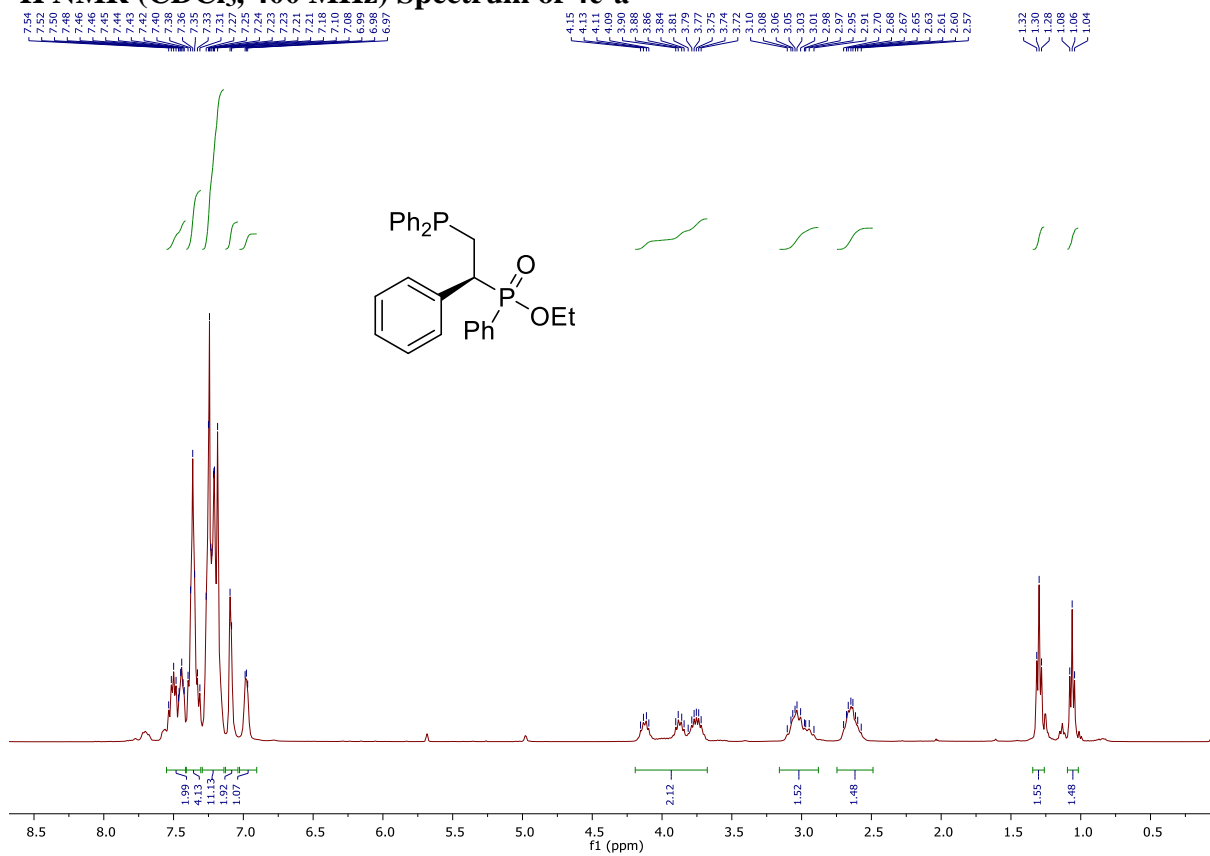

**$^{13}\text{C}$  NMR (CDCl<sub>3</sub>, 101 MHz) Spectrum of 4e'a**

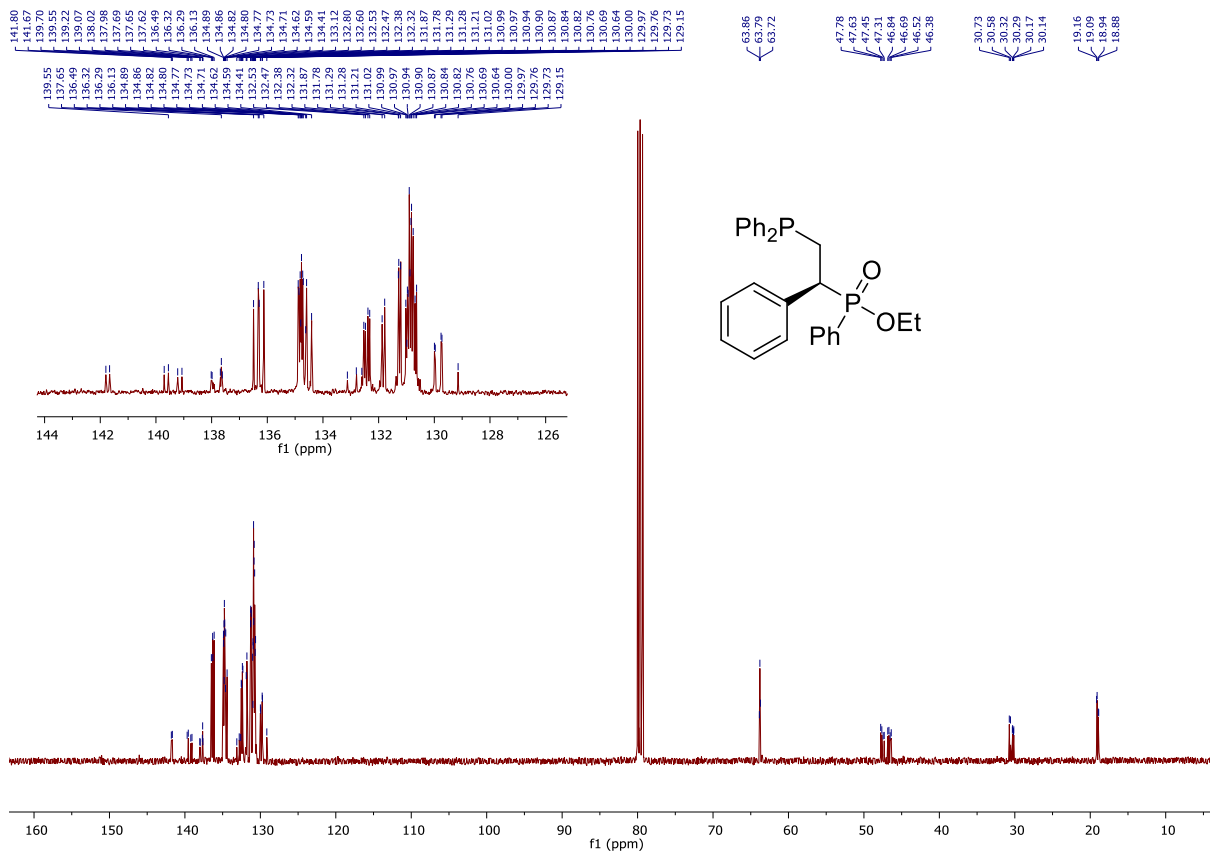

**<sup>31</sup>P NMR (CDCl<sub>3</sub>, 162 MHz) Spectrum of 4e'a**

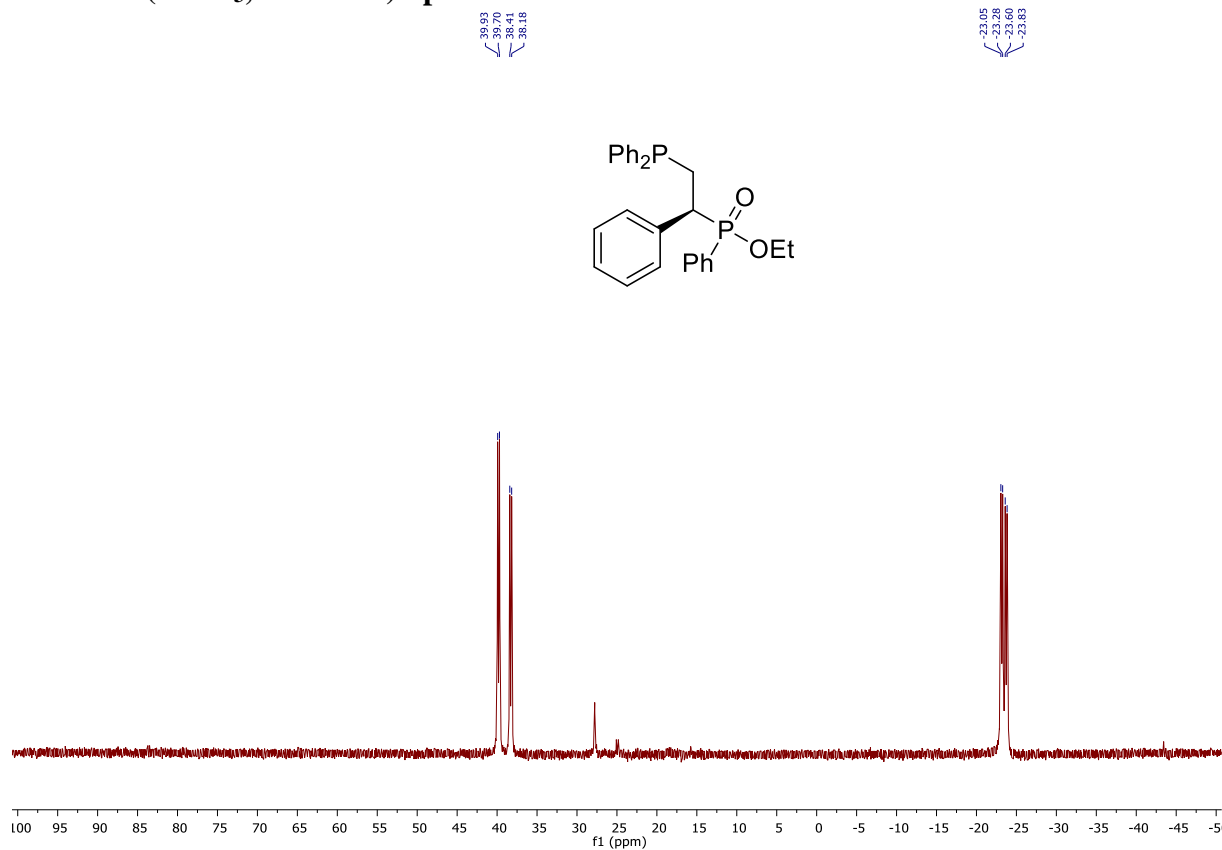



### $^{31}\text{P}$ NMR ( $\text{CDCl}_3$ , 162 MHz) Spectrum of 5ab

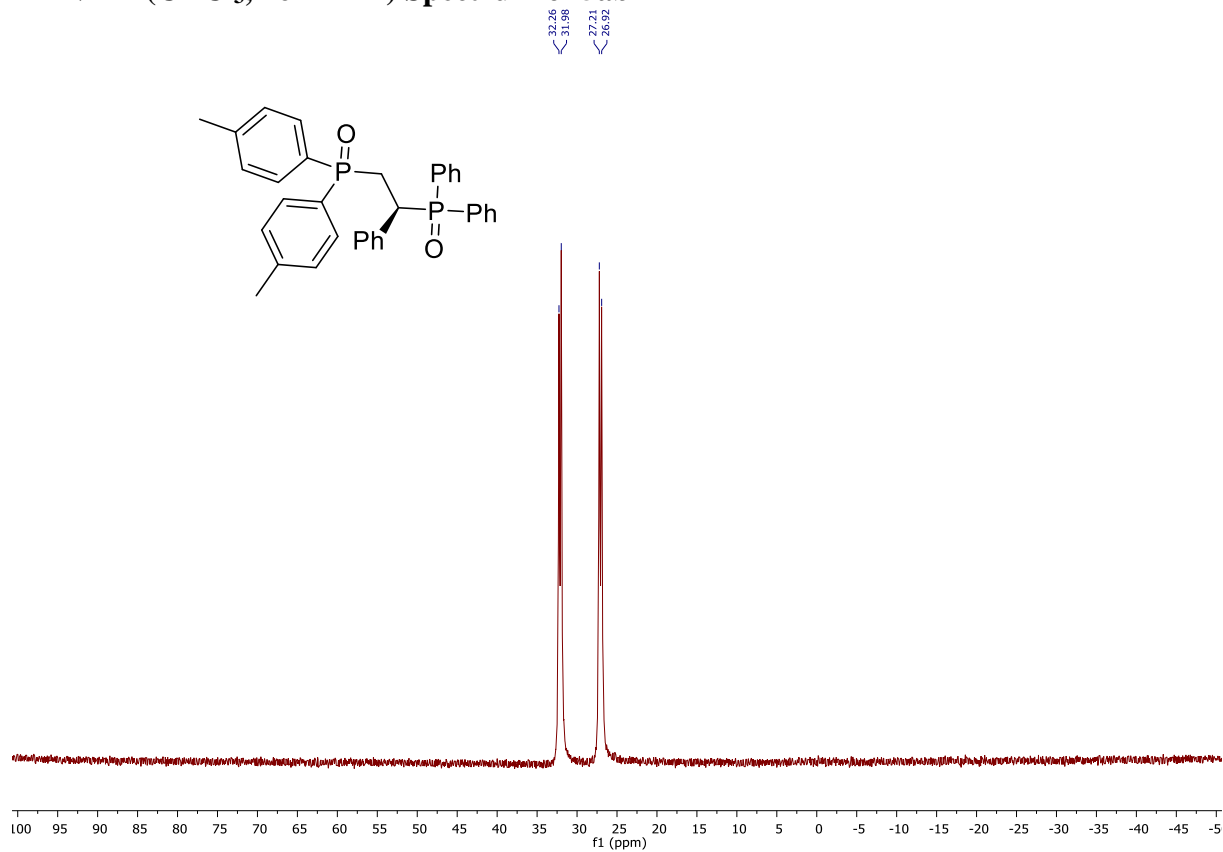

### $^1\text{H}$ NMR ( $\text{CDCl}_3$ , 400 MHz) Spectrum of 5ac

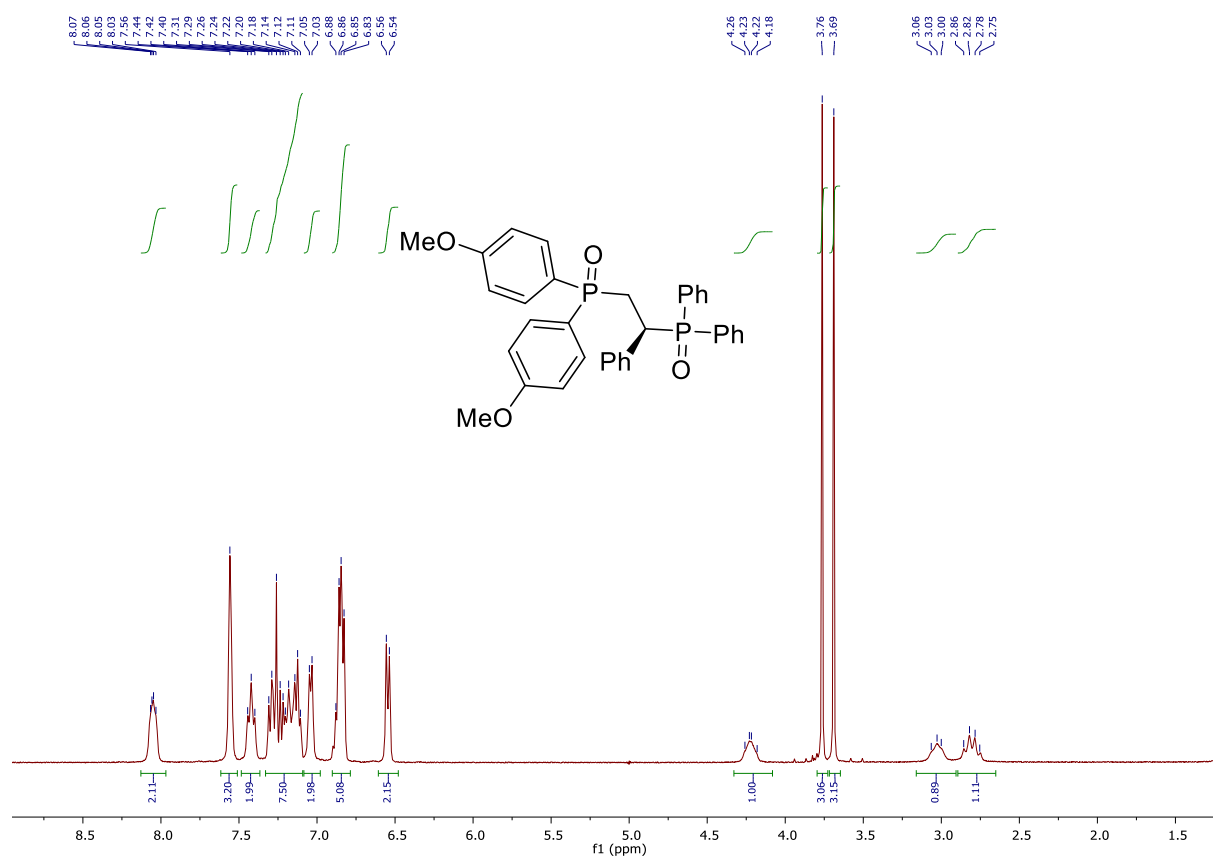

### <sup>13</sup>C NMR (CDCl<sub>3</sub>, 101 MHz) Spectrum of 5ac

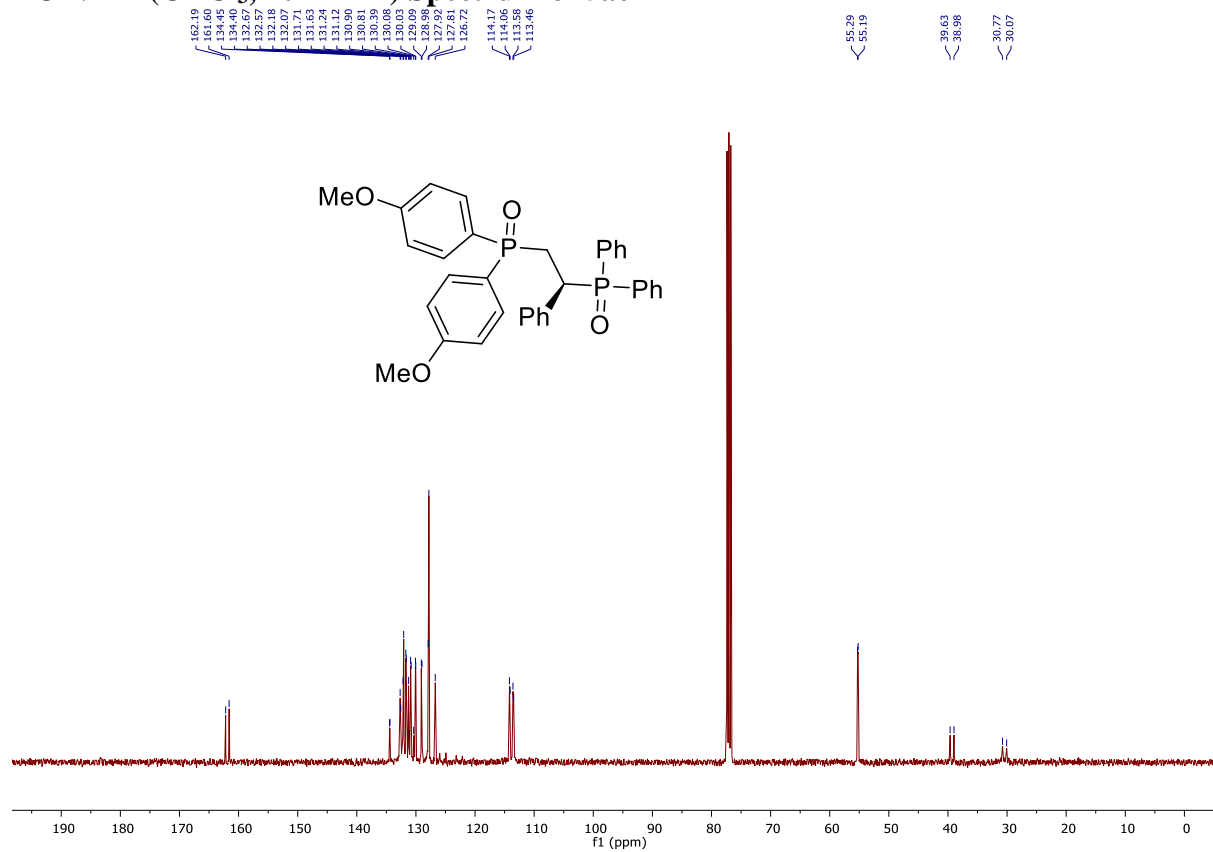

### <sup>31</sup>P NMR (CDCl<sub>3</sub>, 162 MHz) Spectrum of 5ac

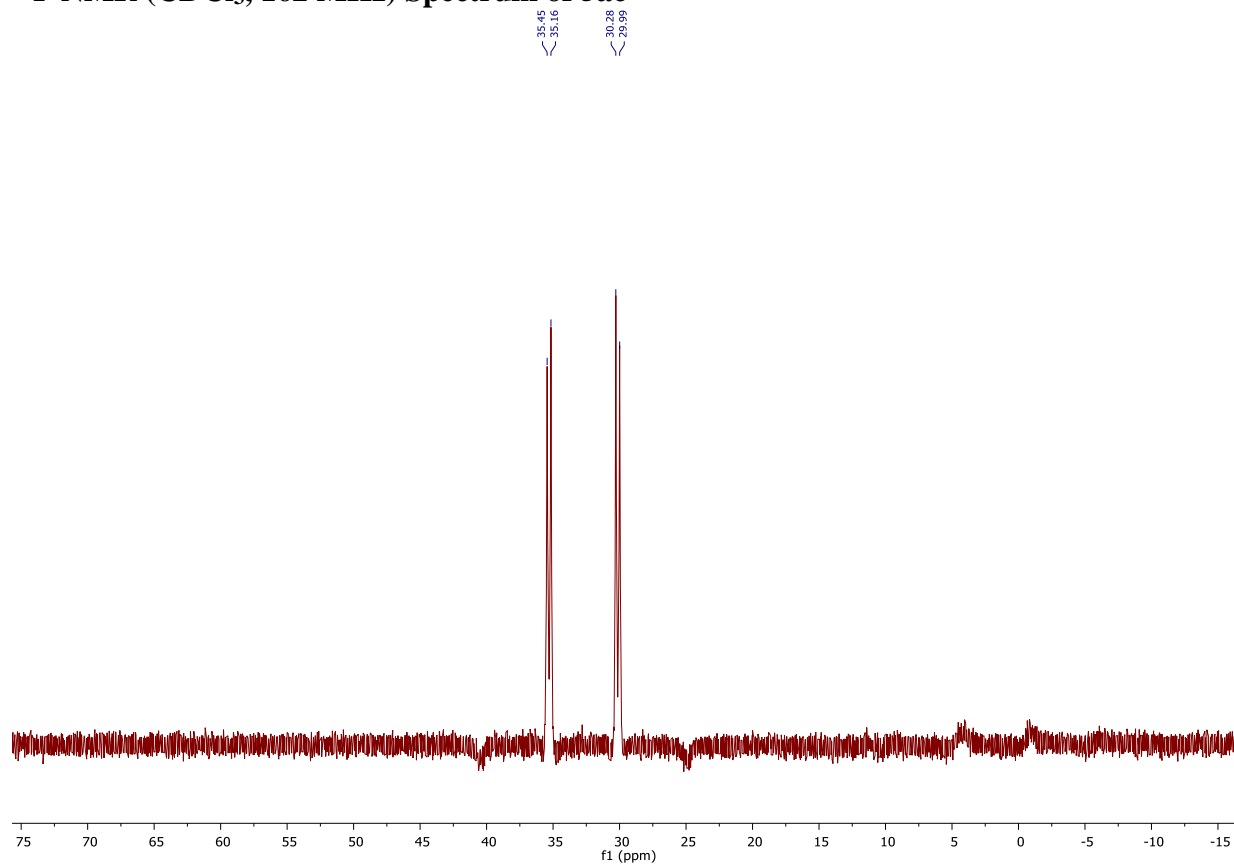

# <sup>1</sup>H NMR (CDCl<sub>3</sub>, 400 MHz) Spectrum of 5b'h

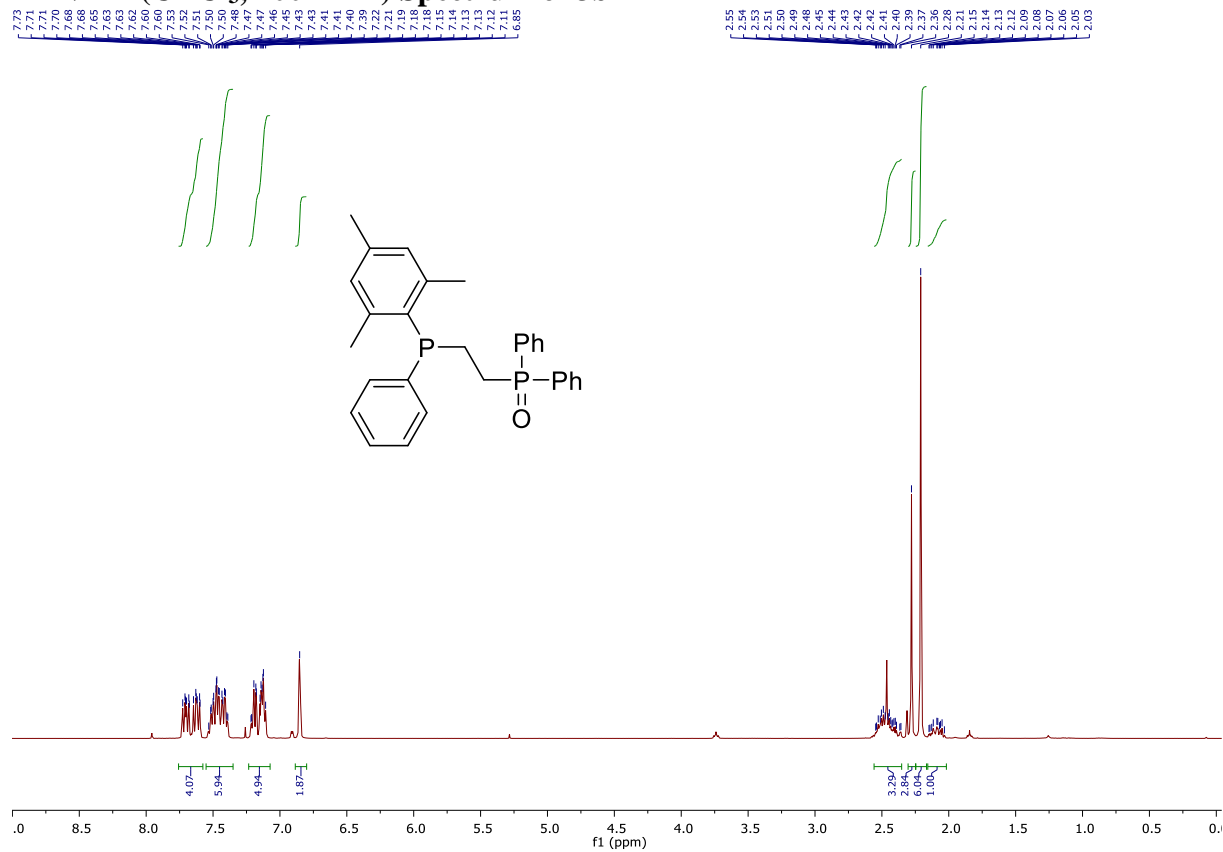

# <sup>13</sup>C NMR (CDCl<sub>3</sub>, 101 MHz) Spectrum of 5b'h

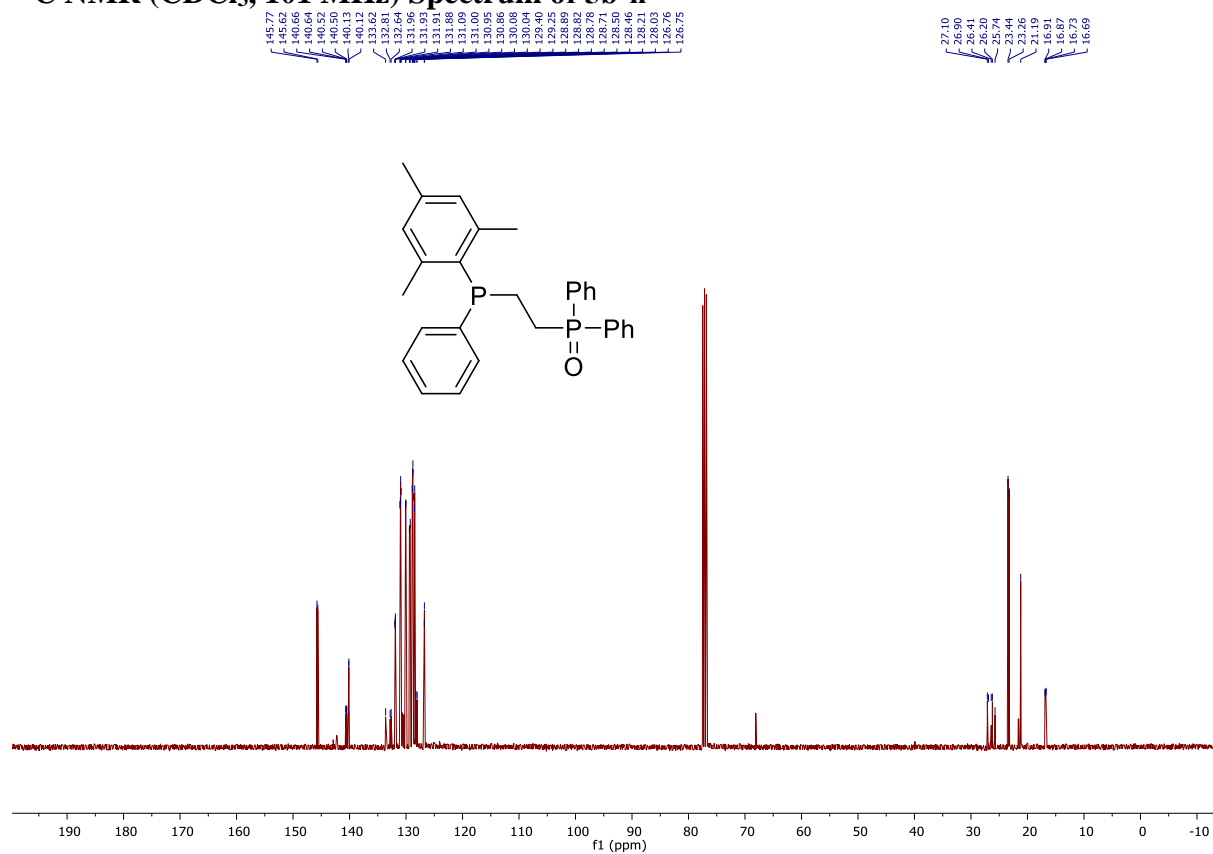

**$^{31}\text{P}$  NMR ( $\text{CDCl}_3$ , 162 MHz) Spectrum of 5b'h**

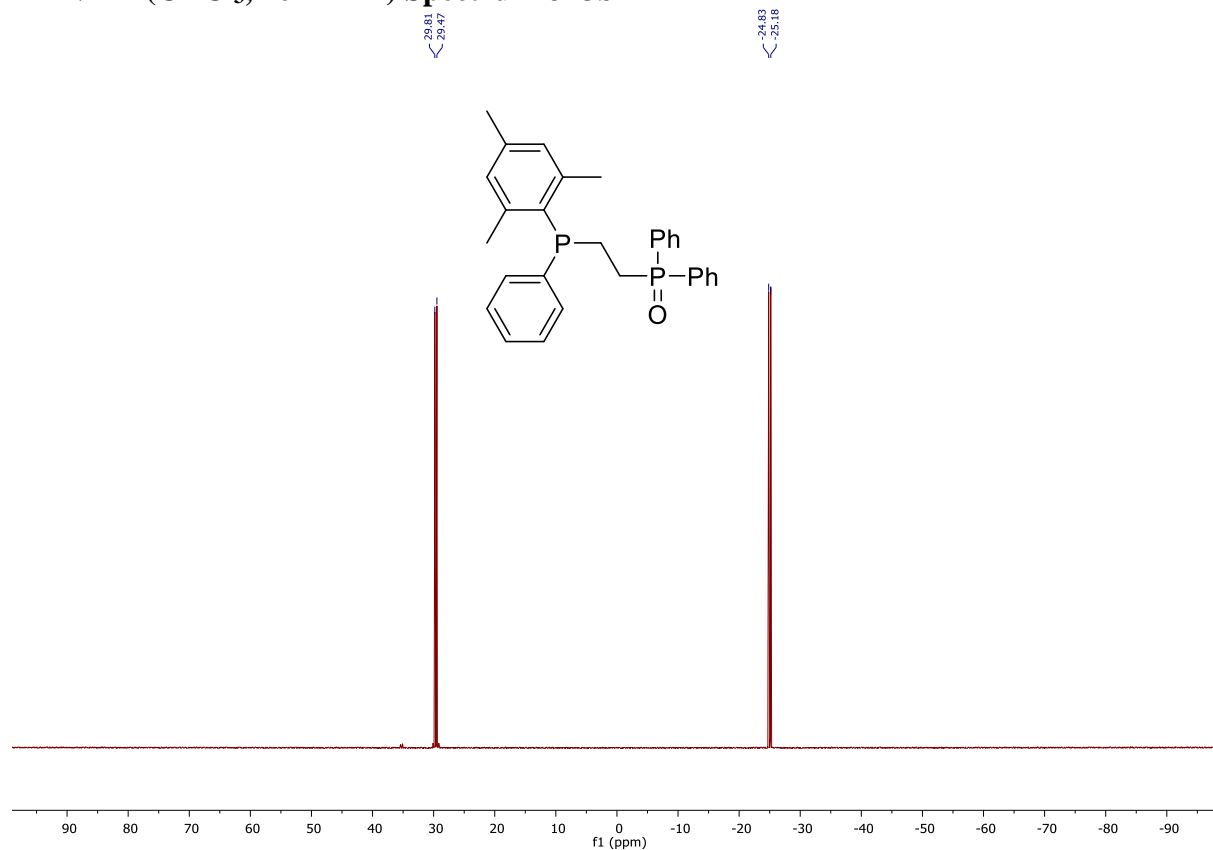

**$^1\text{H}$  NMR ( $\text{CDCl}_3$ , 400 MHz) Spectrum of 6aa**

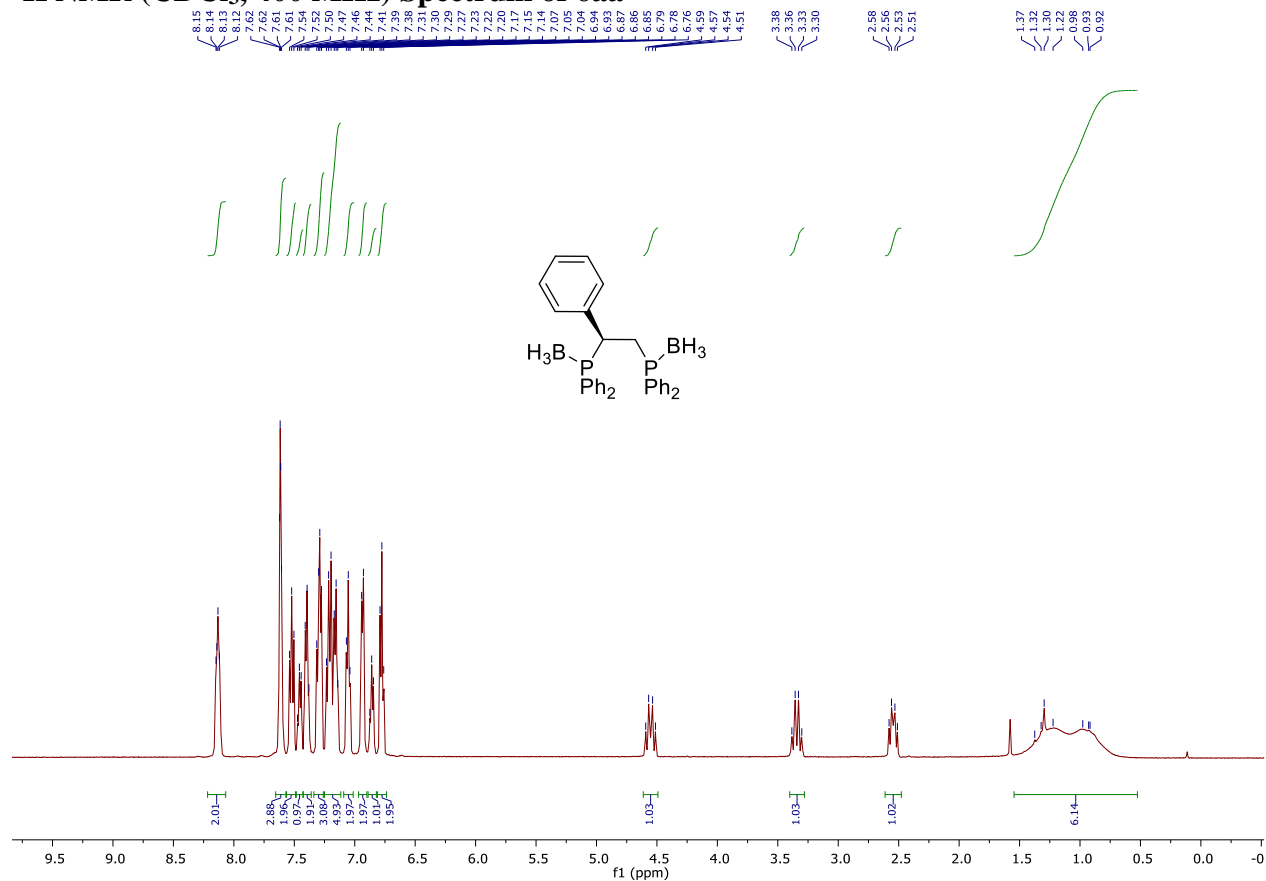

### <sup>13</sup>C NMR (CDCl<sub>3</sub>, 101 MHz) Spectrum of 6aa

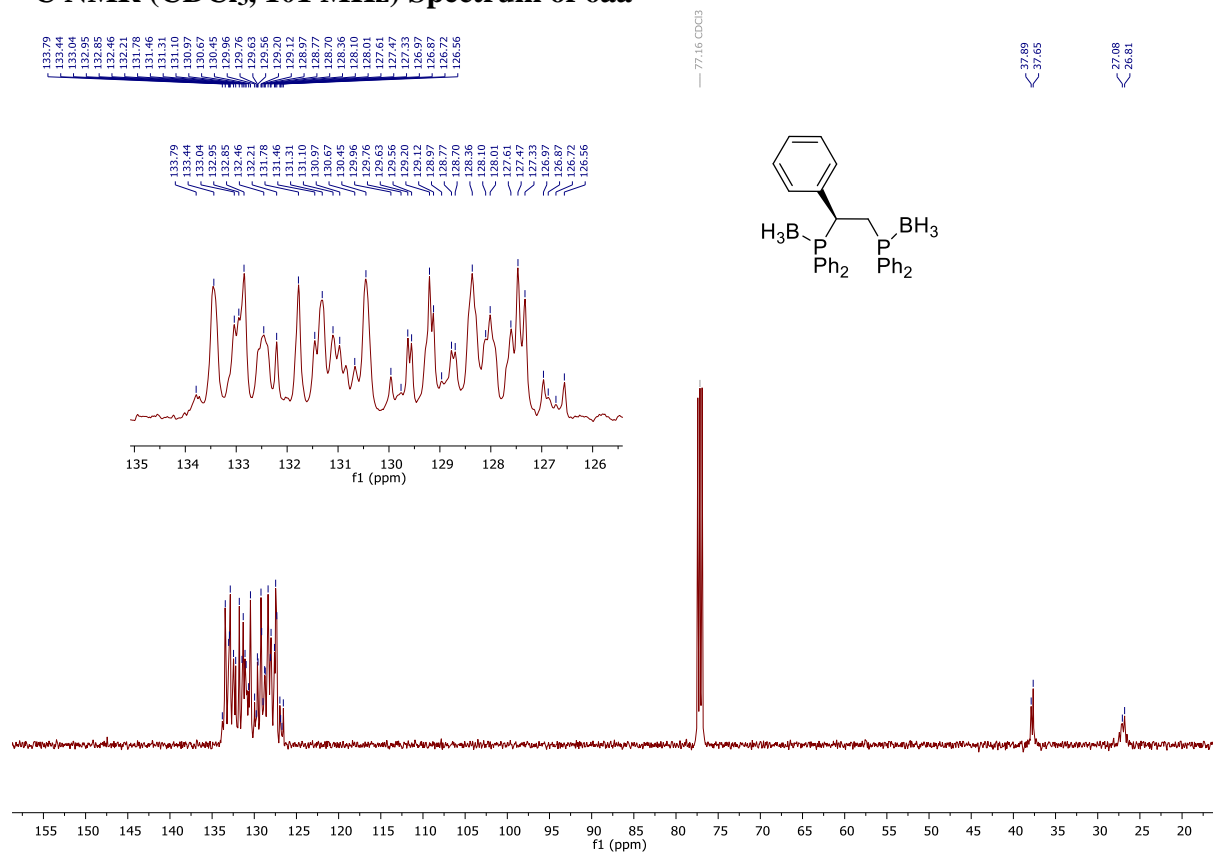

### <sup>31</sup>P NMR (CDCl<sub>3</sub>, 162 MHz) Spectrum of 6aa

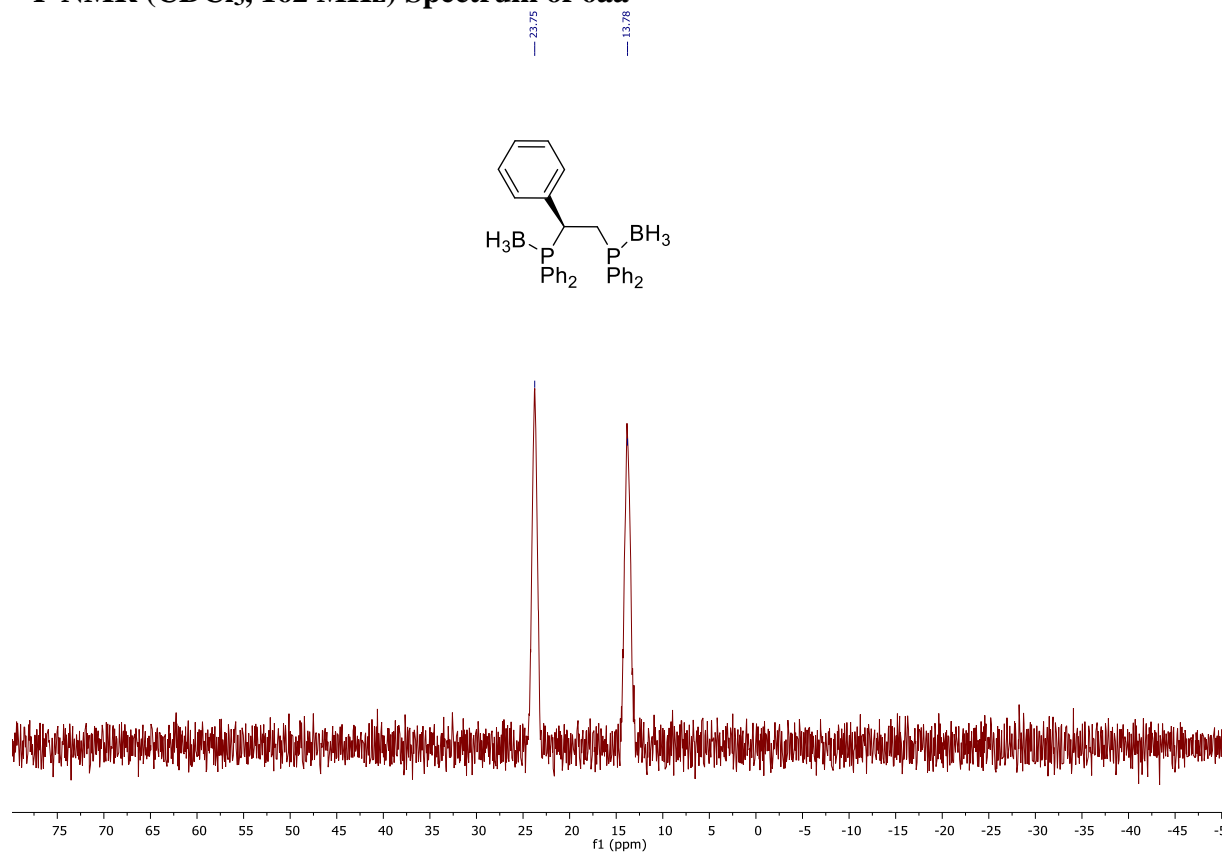



# <sup>1</sup>H NMR (CDCl<sub>3</sub>, 400 MHz) Spectrum of 6ba

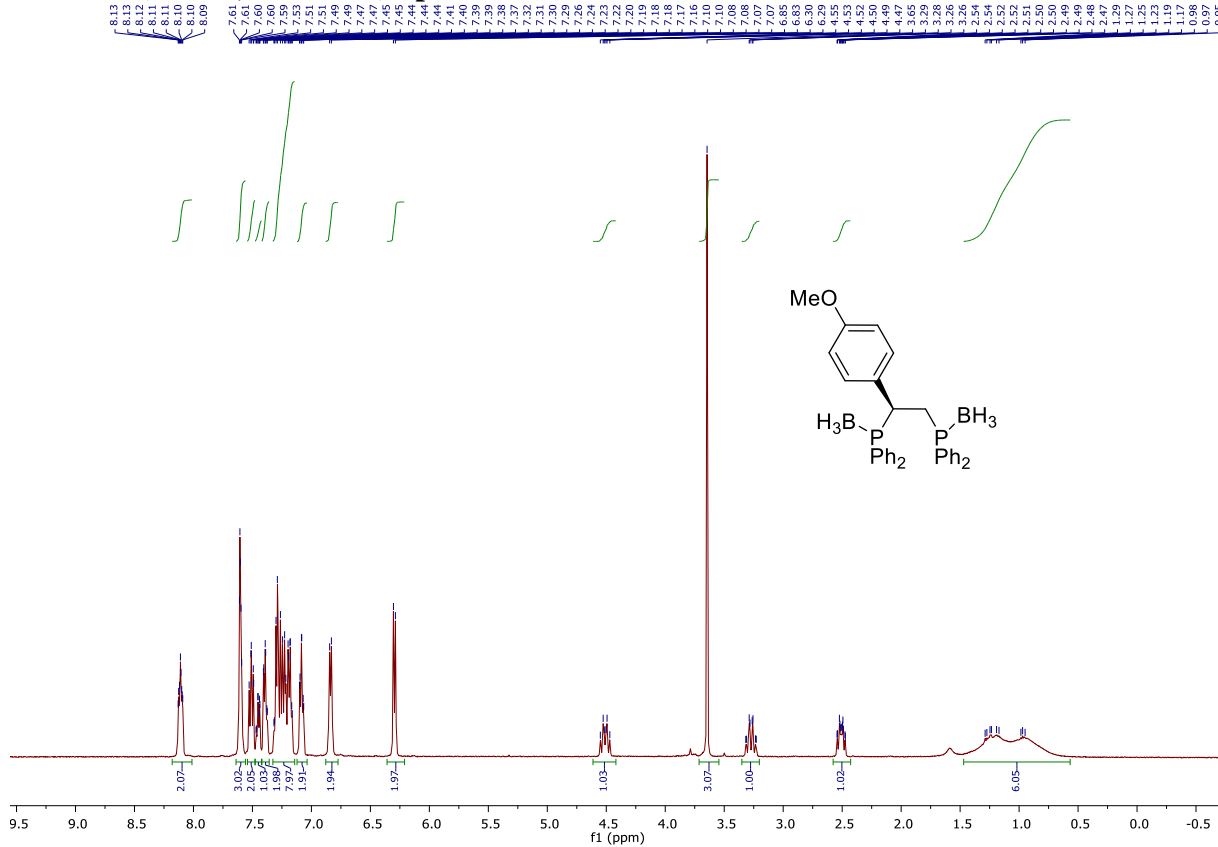

# <sup>13</sup>C NMR (CDCl<sub>3</sub>, 101 MHz) Spectrum of 6ba

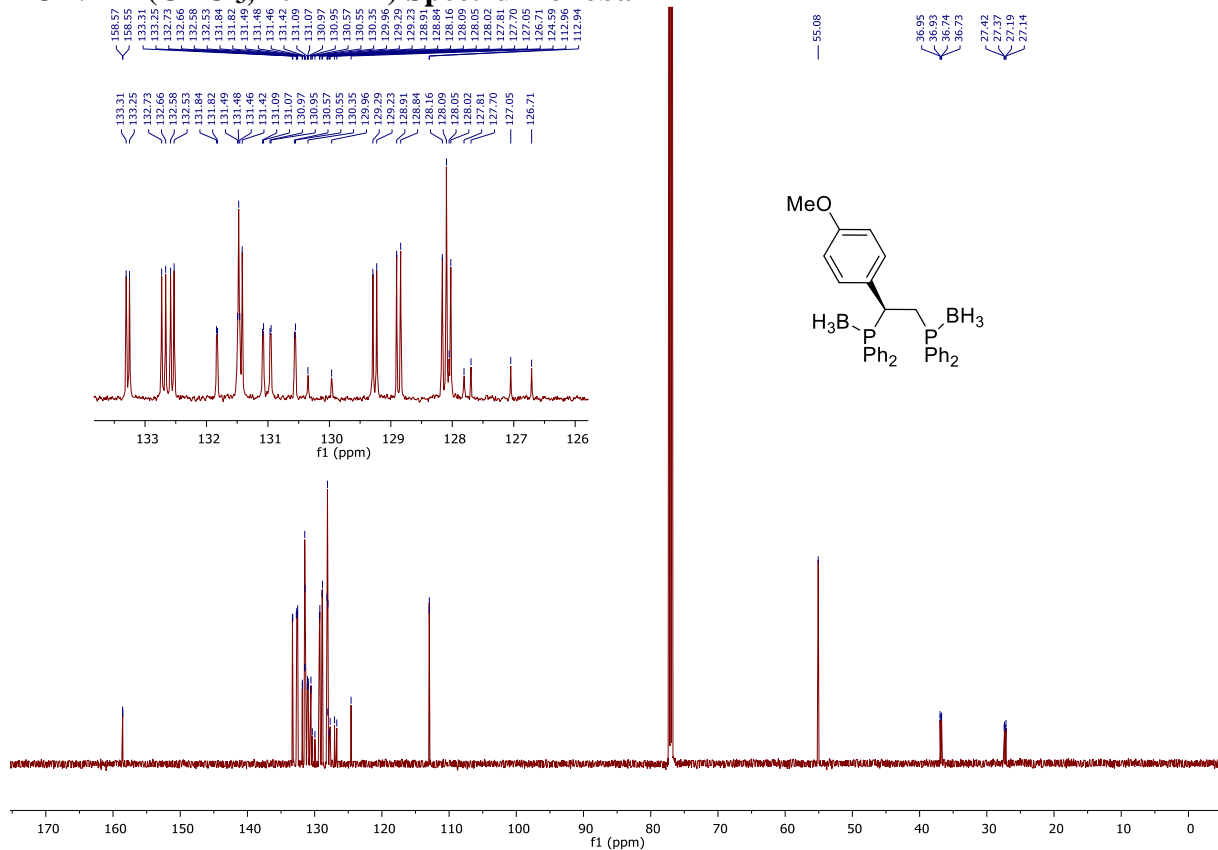

### <sup>31</sup>P NMR (CDCl<sub>3</sub>, 162 MHz) Spectrum of 6ba

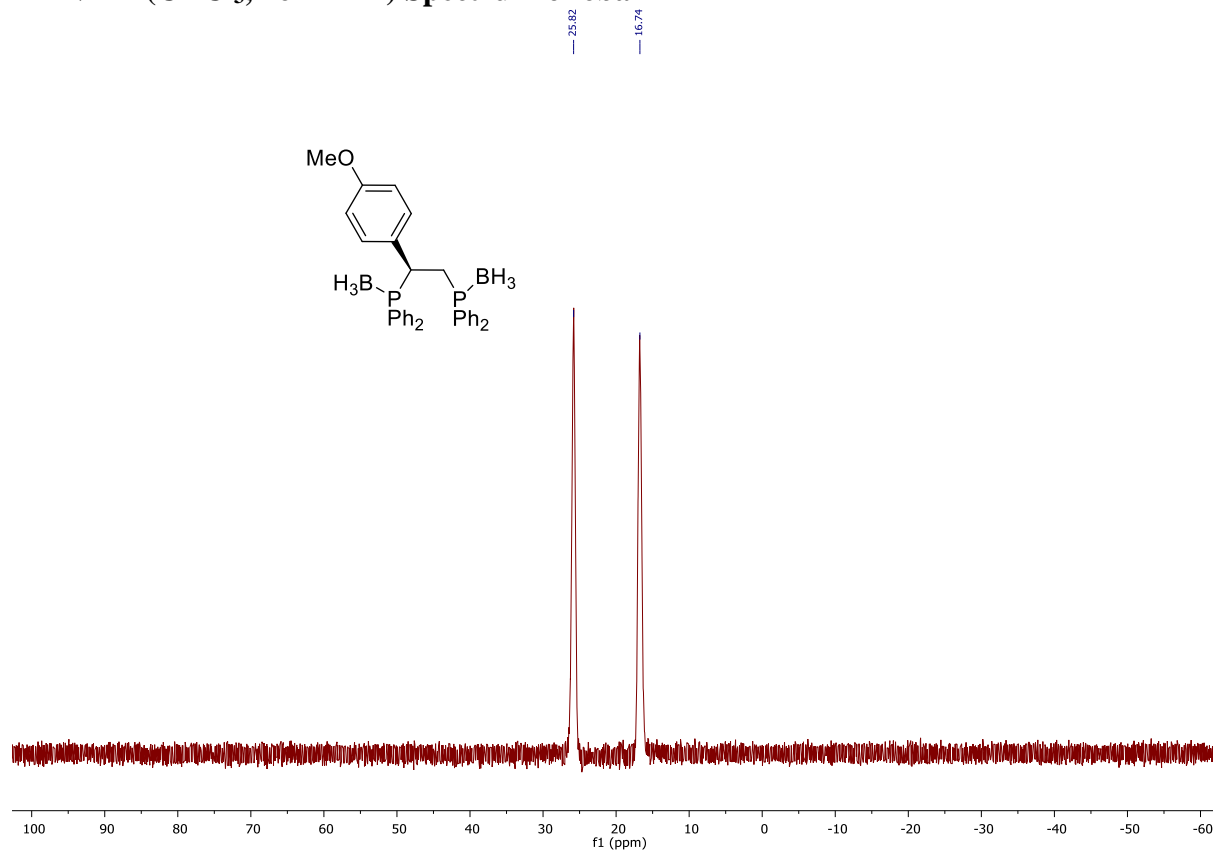

### <sup>1</sup>H NMR (CDCl<sub>3</sub>, 400 MHz) Spectrum of 6ca

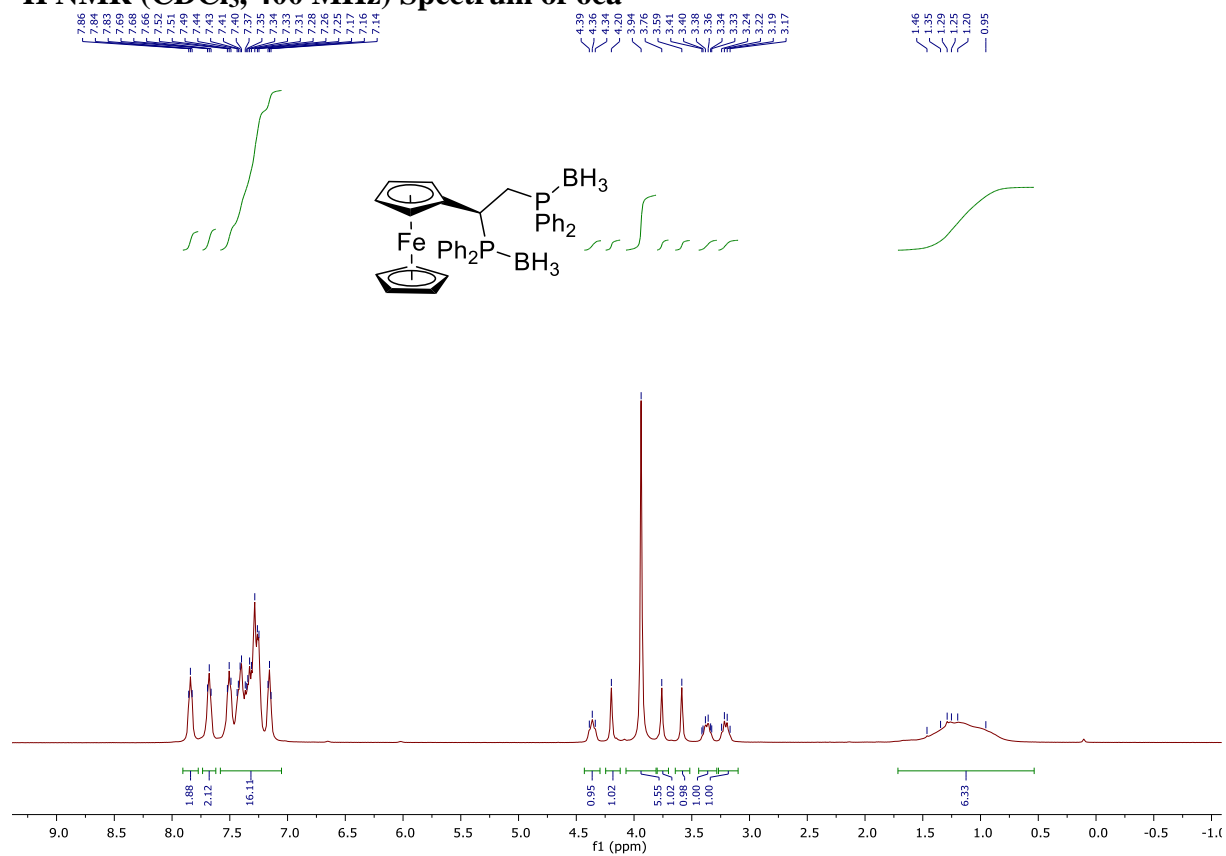

### $^{13}\text{C}$ NMR ( $\text{CDCl}_3$ , 101 MHz) Spectrum of **6ca**

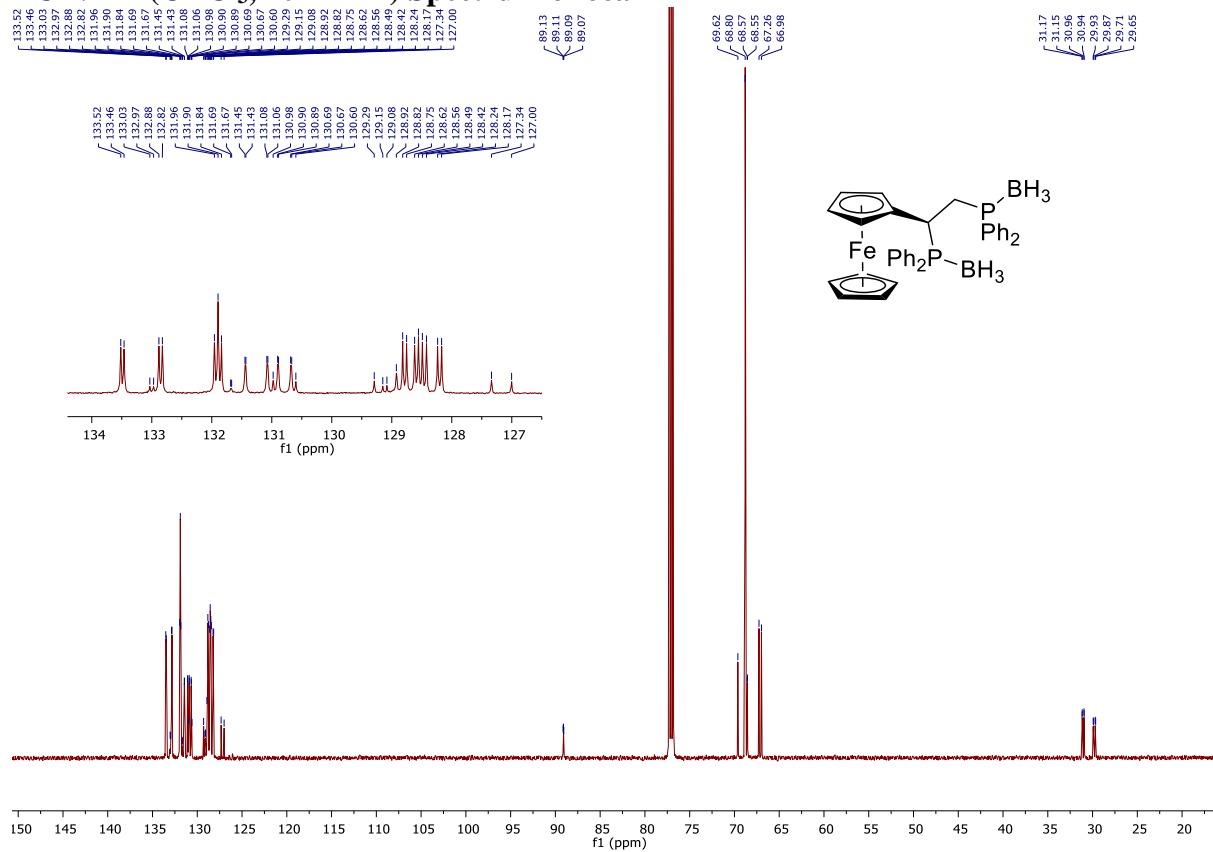

### $^{31}\text{P}$ NMR ( $\text{CDCl}_3$ , 162 MHz) Spectrum of **6ca**

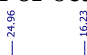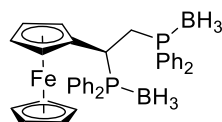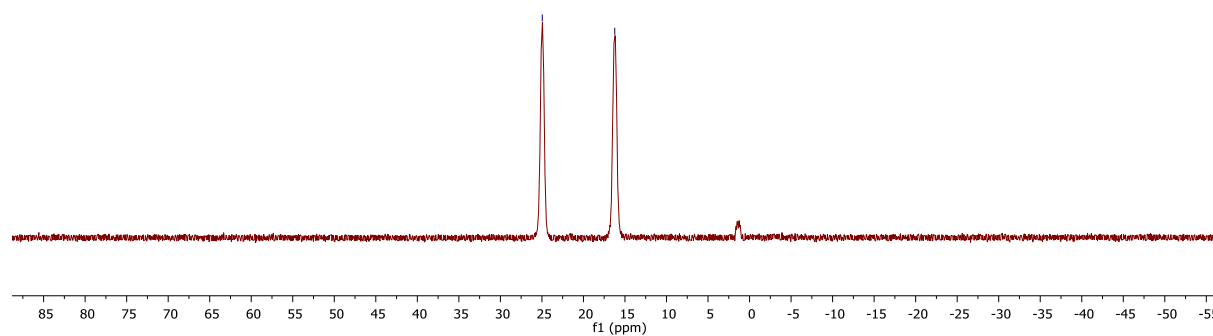

### $^1\text{H}$ NMR ( $\text{CDCl}_3$ , 400 MHz) Spectrum of **6da**



### <sup>31</sup>P NMR (CDCl<sub>3</sub>, 162 MHz) Spectrum of 6da

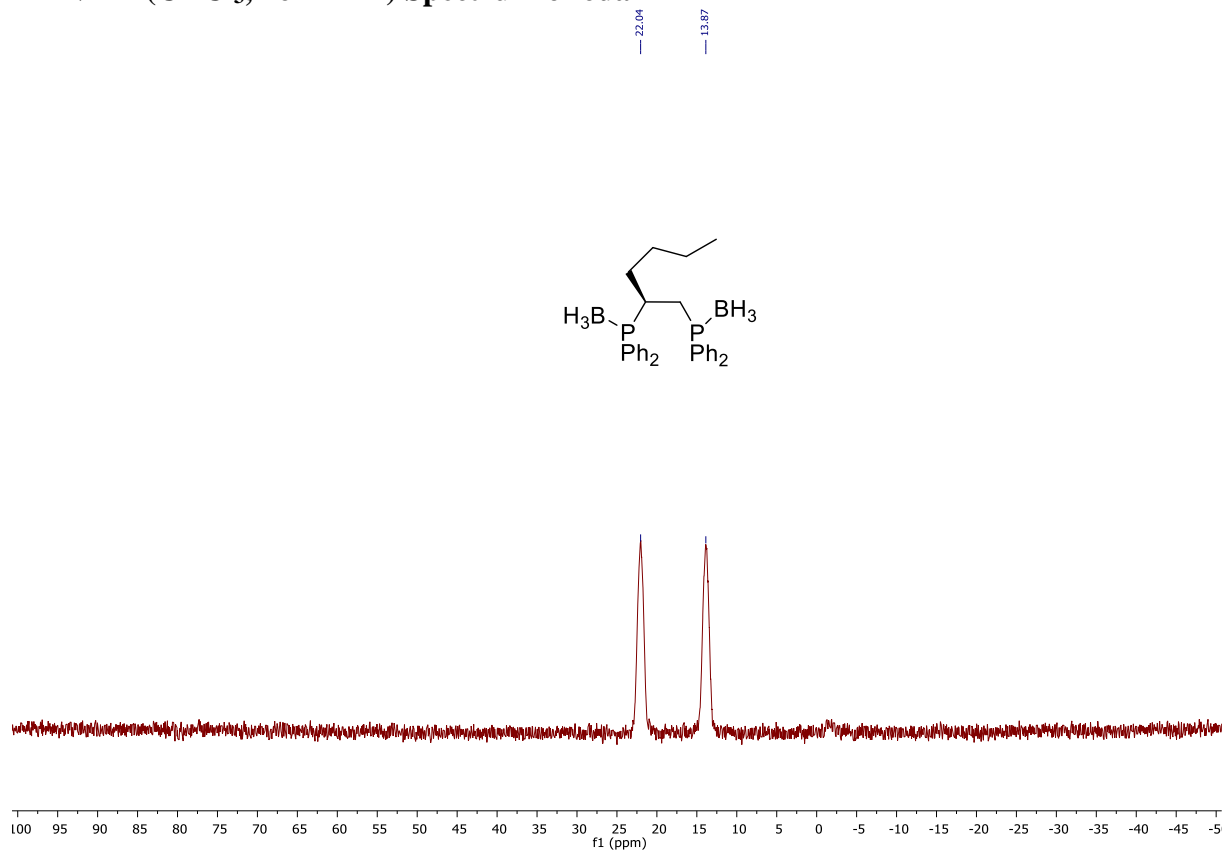

### <sup>1</sup>H NMR (Toluene-d<sub>8</sub>, 400 MHz) Spectrum of 7aa

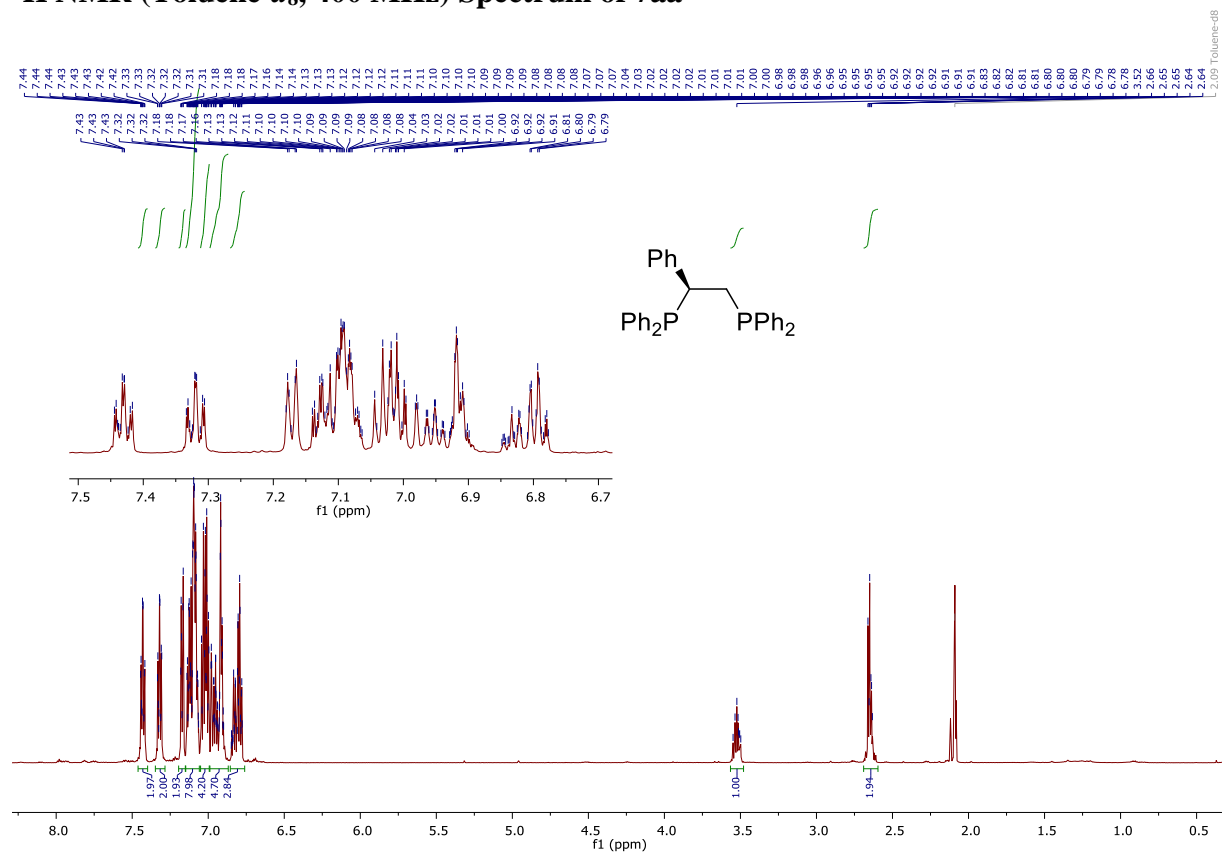

### <sup>13</sup>C NMR (Toluene-*d*<sub>8</sub>, 101 MHz) Spectrum of 7aa

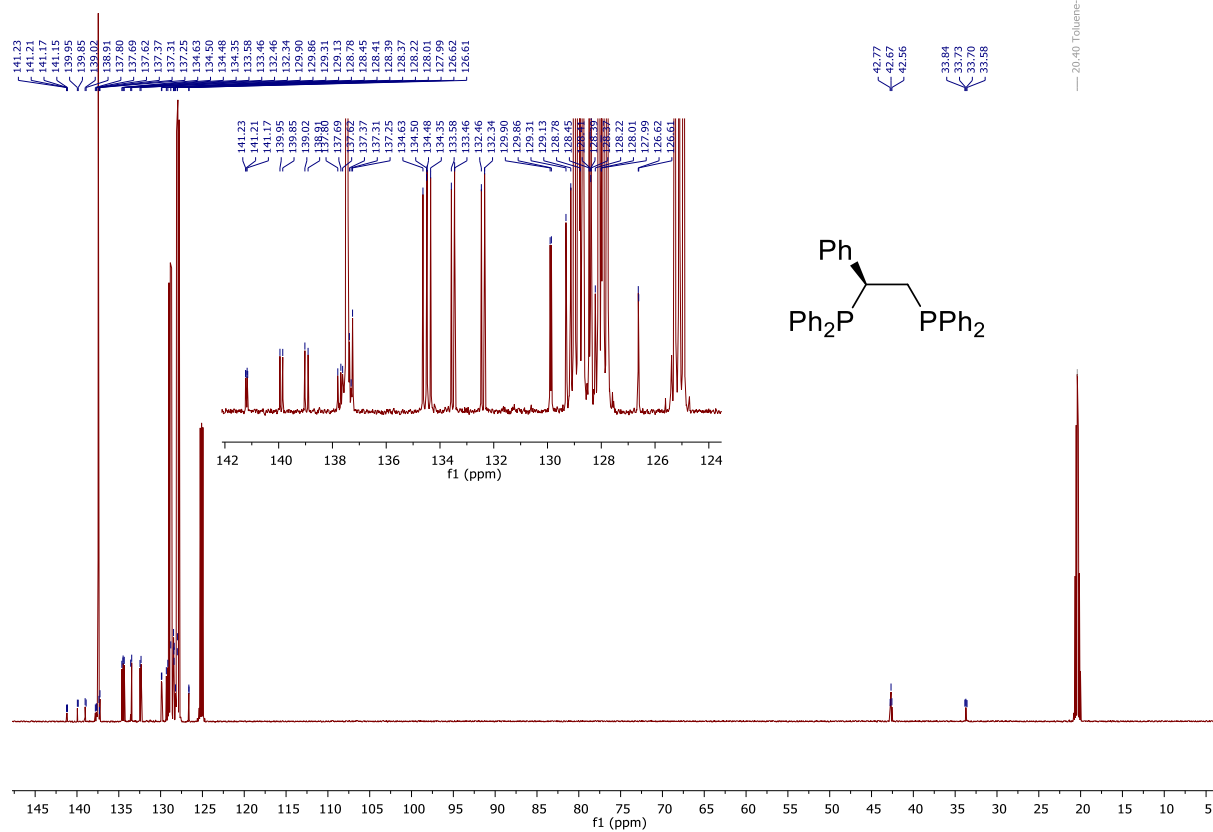

### <sup>31</sup>P NMR (CDCl<sub>3</sub>, 162 MHz) Spectrum of 7aa

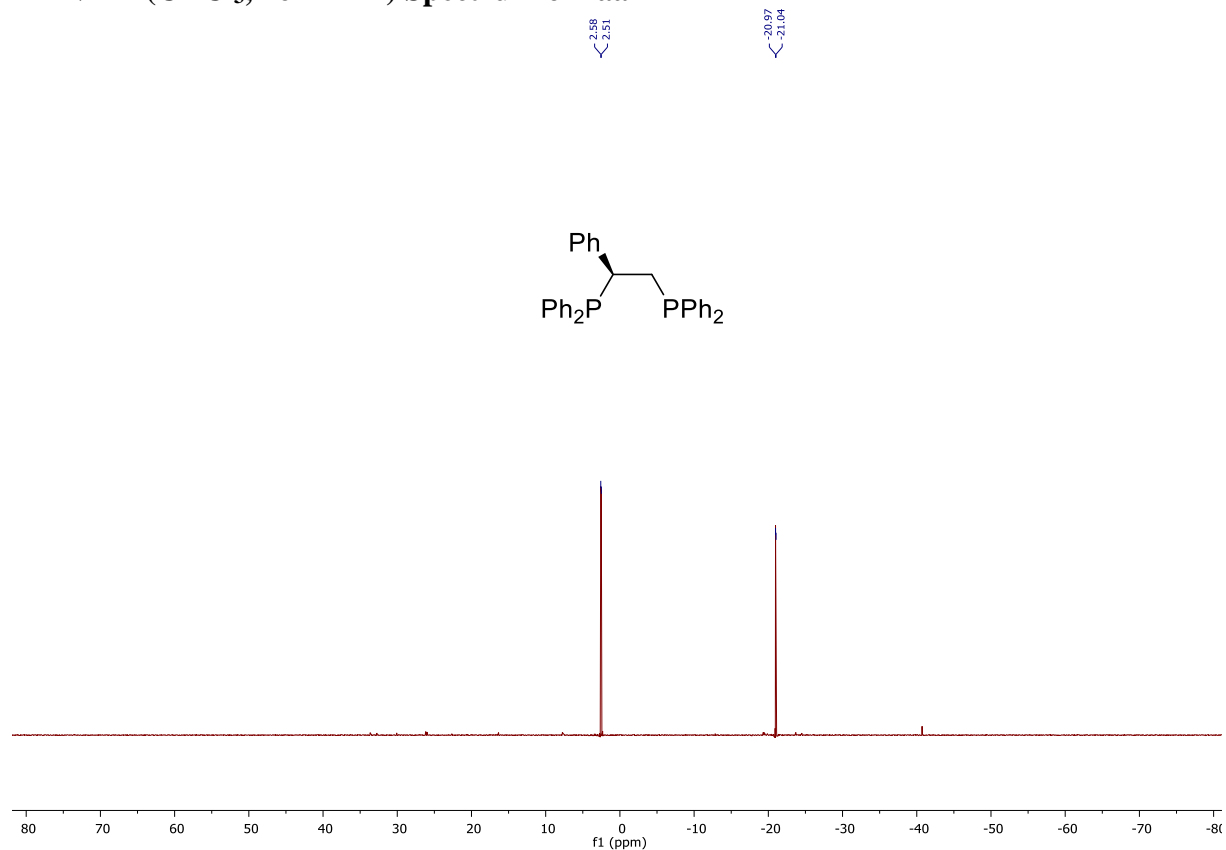

# <sup>1</sup>H NMR (Toluene-d<sub>8</sub>, 400 MHz) Spectrum of 7ba

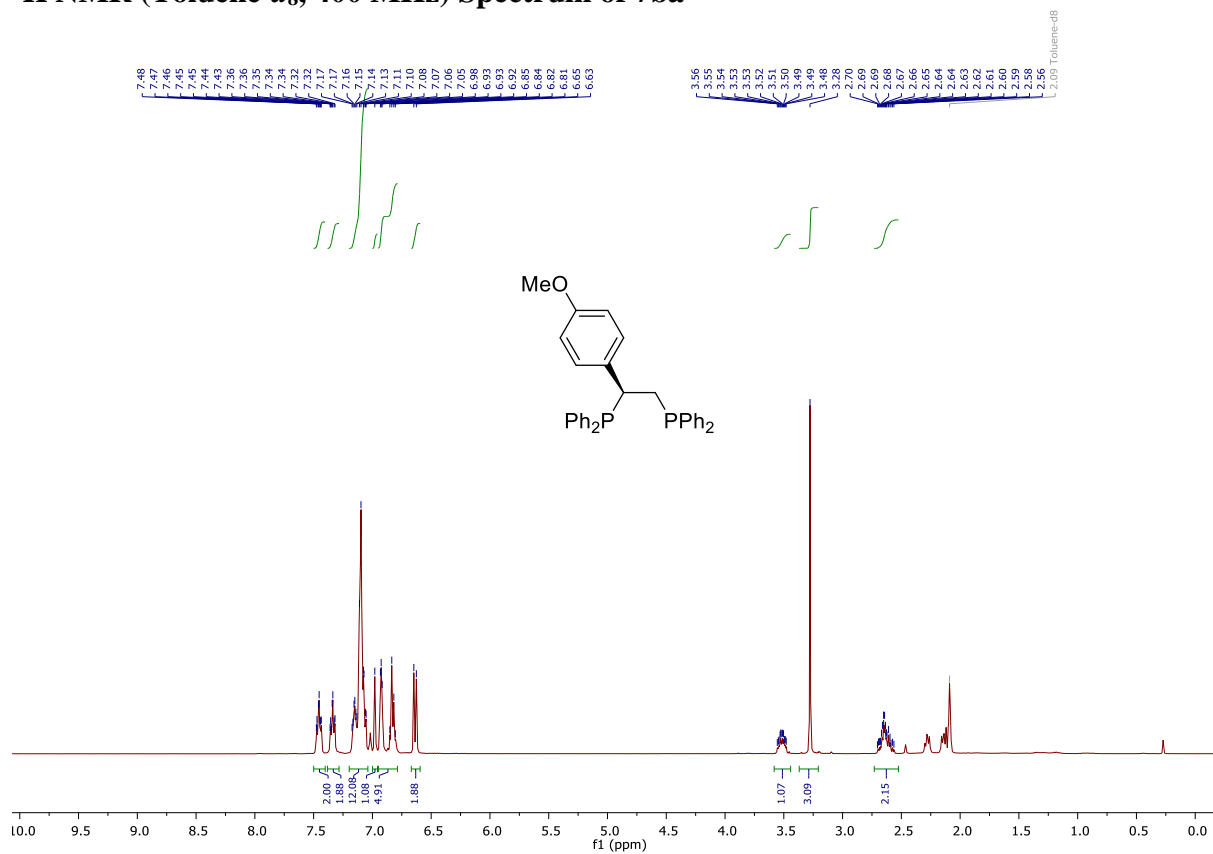

# <sup>13</sup>C NMR (Toluene-d<sub>8</sub>, 101 MHz) Spectrum of 7ba

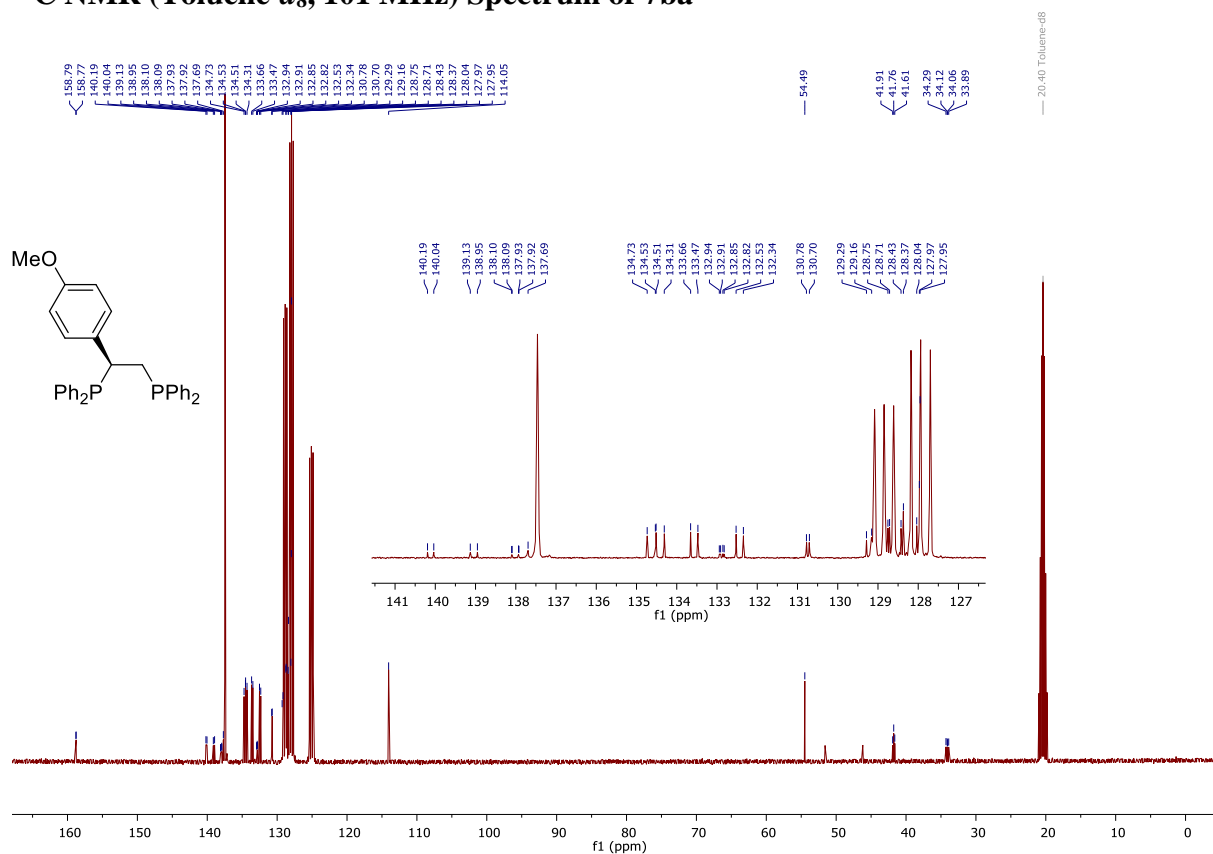

### $^{31}\text{P}$ NMR (Toluene- $d_8$ , 162 MHz) Spectrum of 7ba

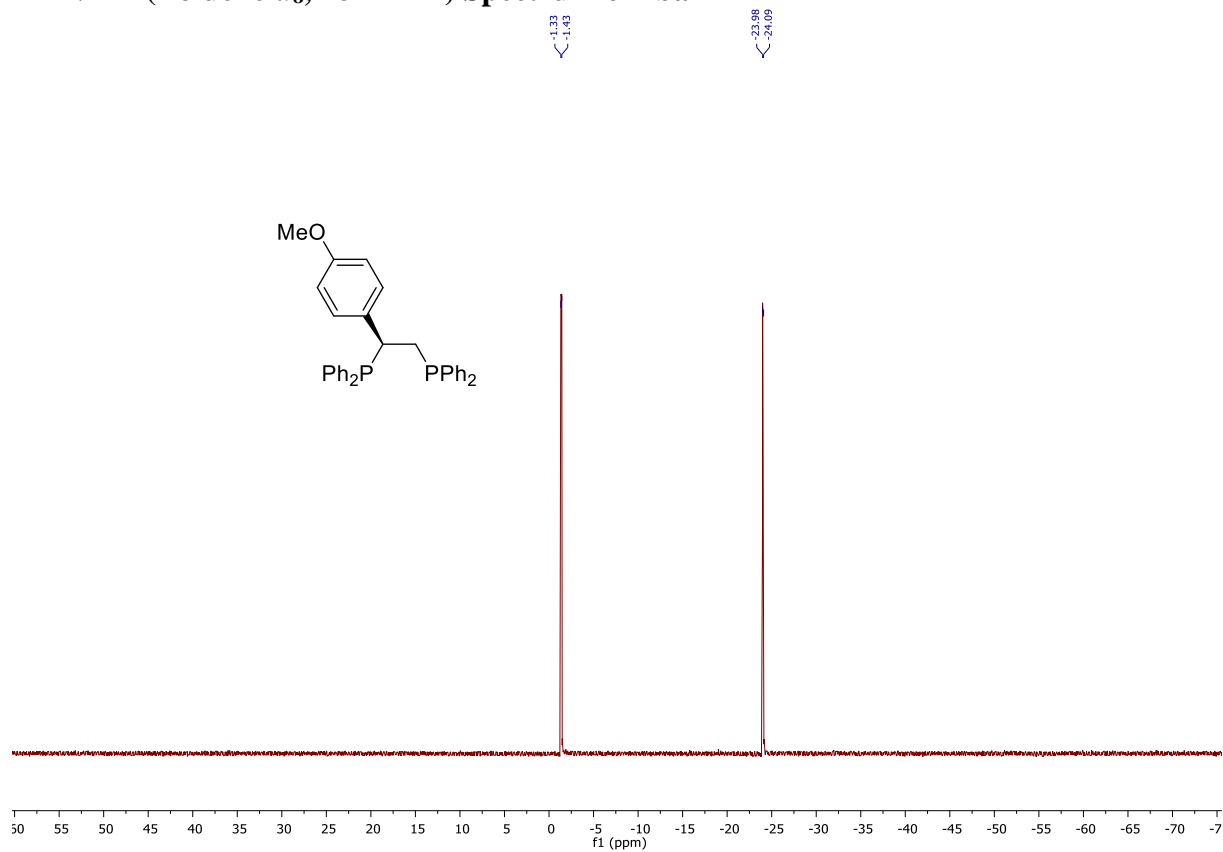

### $^1\text{H}$ NMR ( $\text{CDCl}_3$ , 400 MHz) Spectrum of 7ca

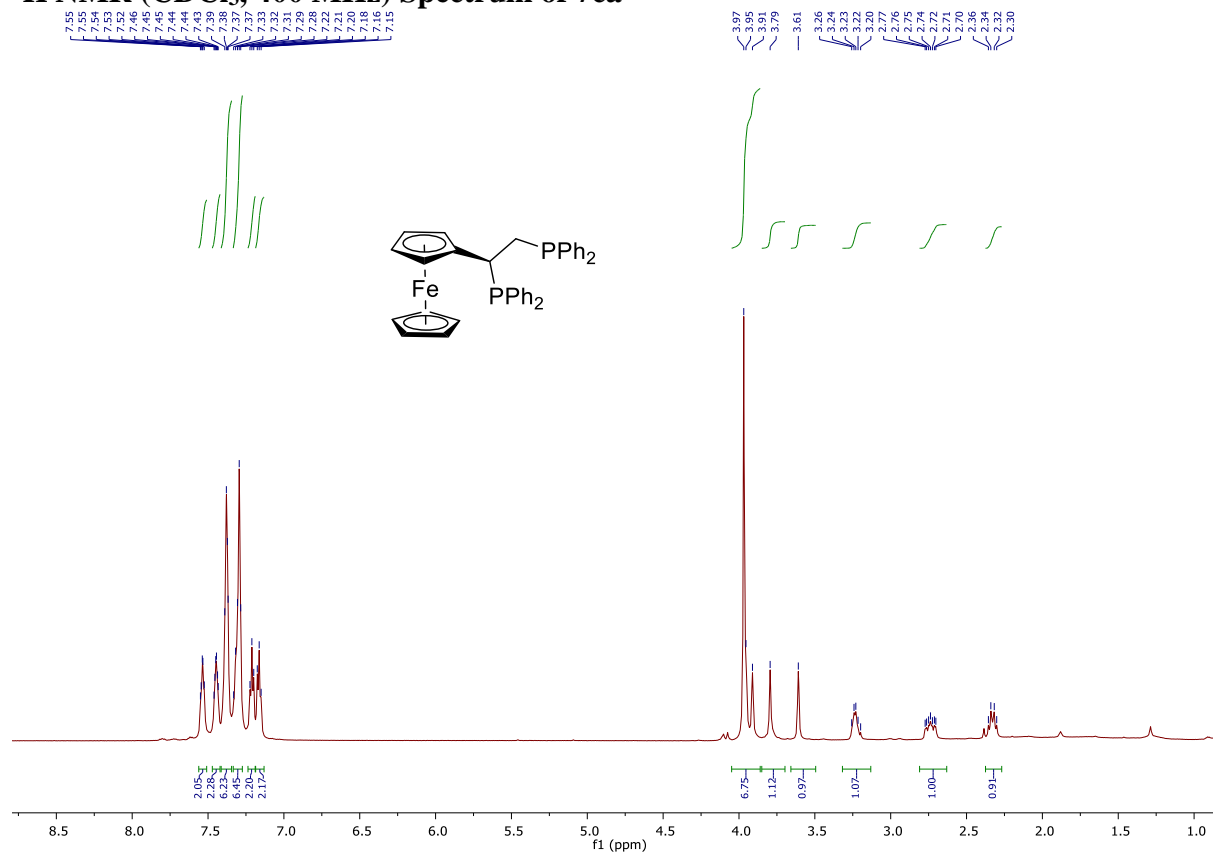



### $^{13}\text{C}$ NMR ( $\text{CDCl}_3$ , 101 MHz) Spectrum of 7ca

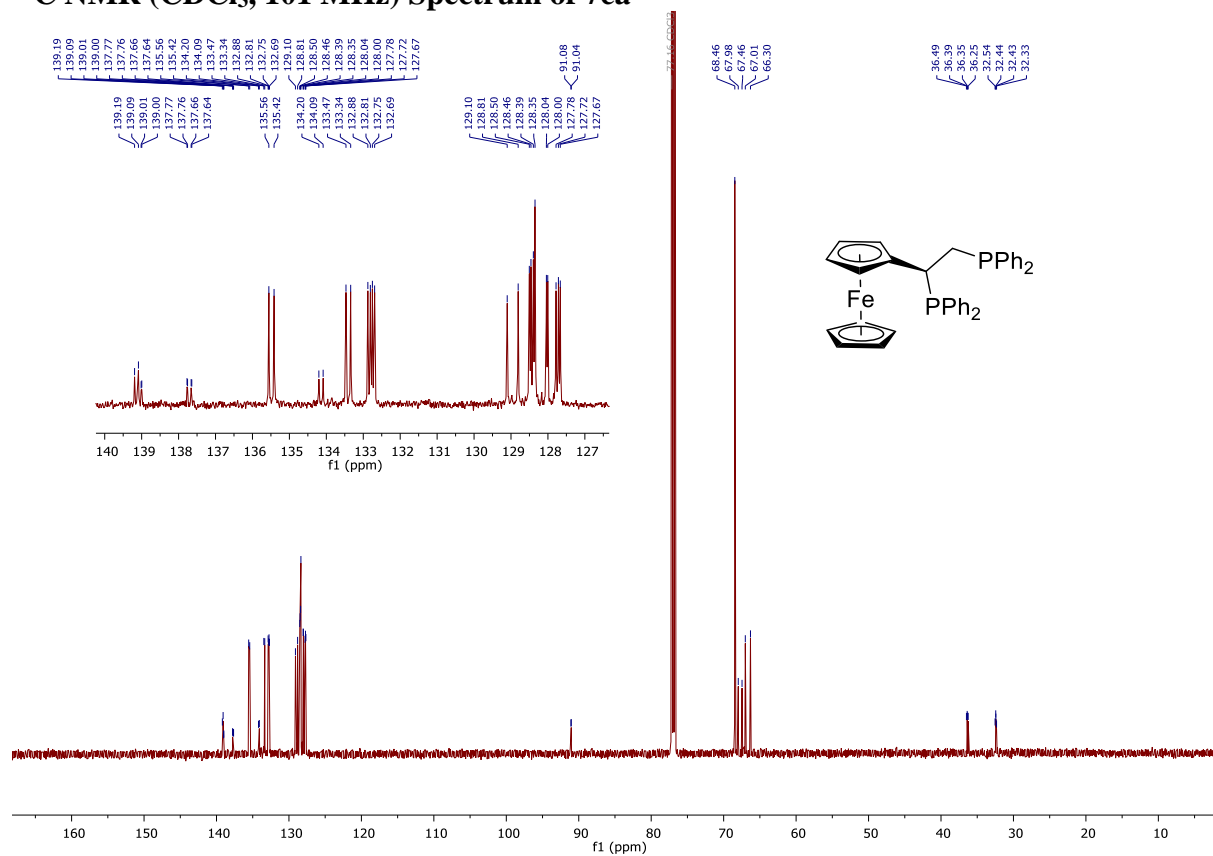

### $^{31}\text{P}$ NMR ( $\text{CDCl}_3$ , 162 MHz) Spectrum of 7ca

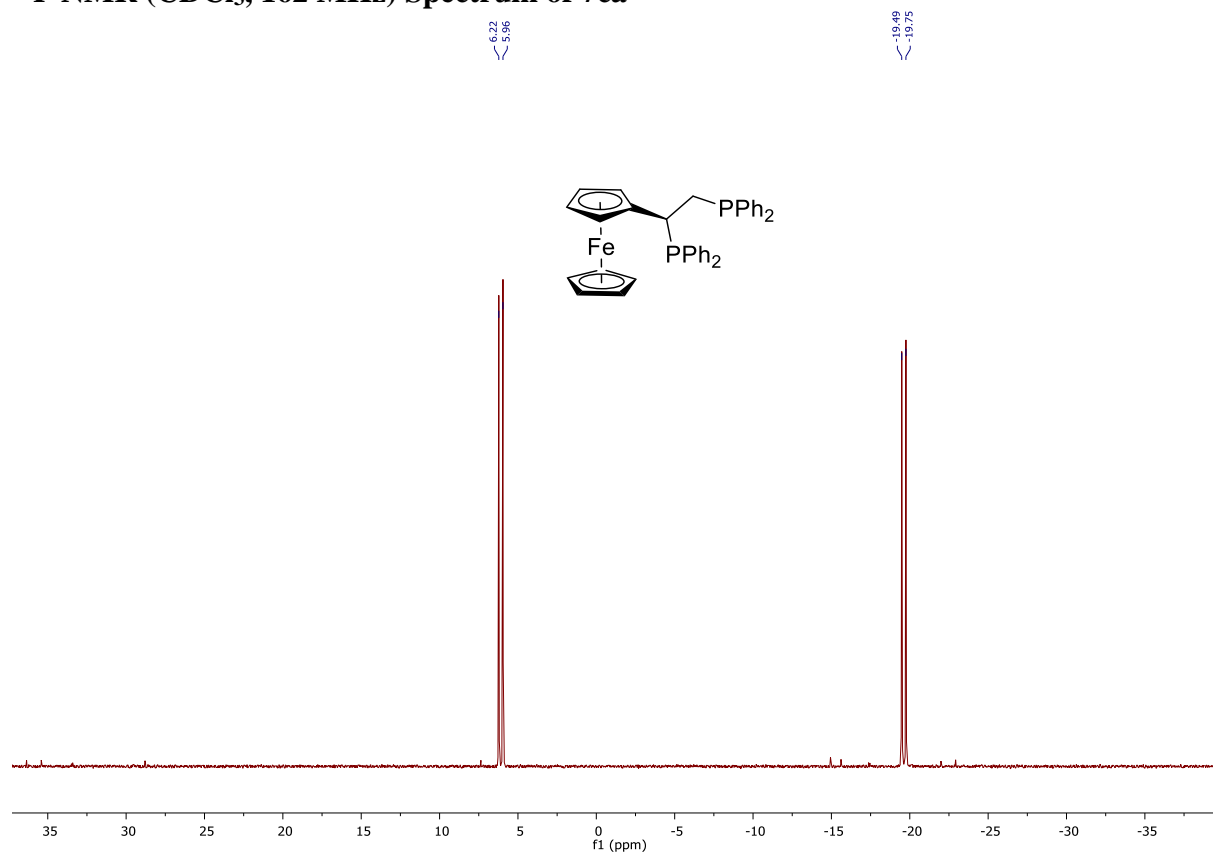



### <sup>31</sup>P NMR (Toluene-*d*<sub>8</sub>, 162 MHz) Spectrum of 7da

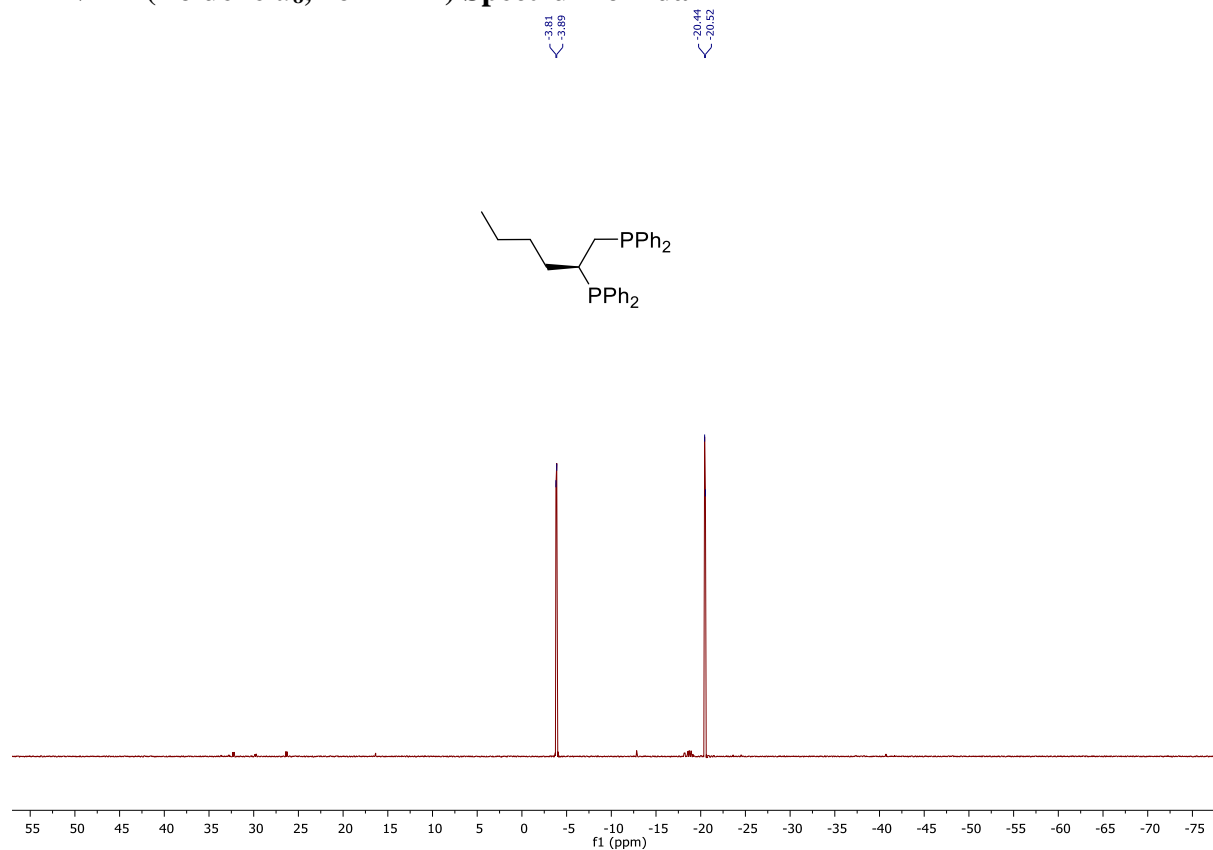

### <sup>1</sup>H NMR (CDCl<sub>3</sub>, 400 MHz) Spectrum of 1g

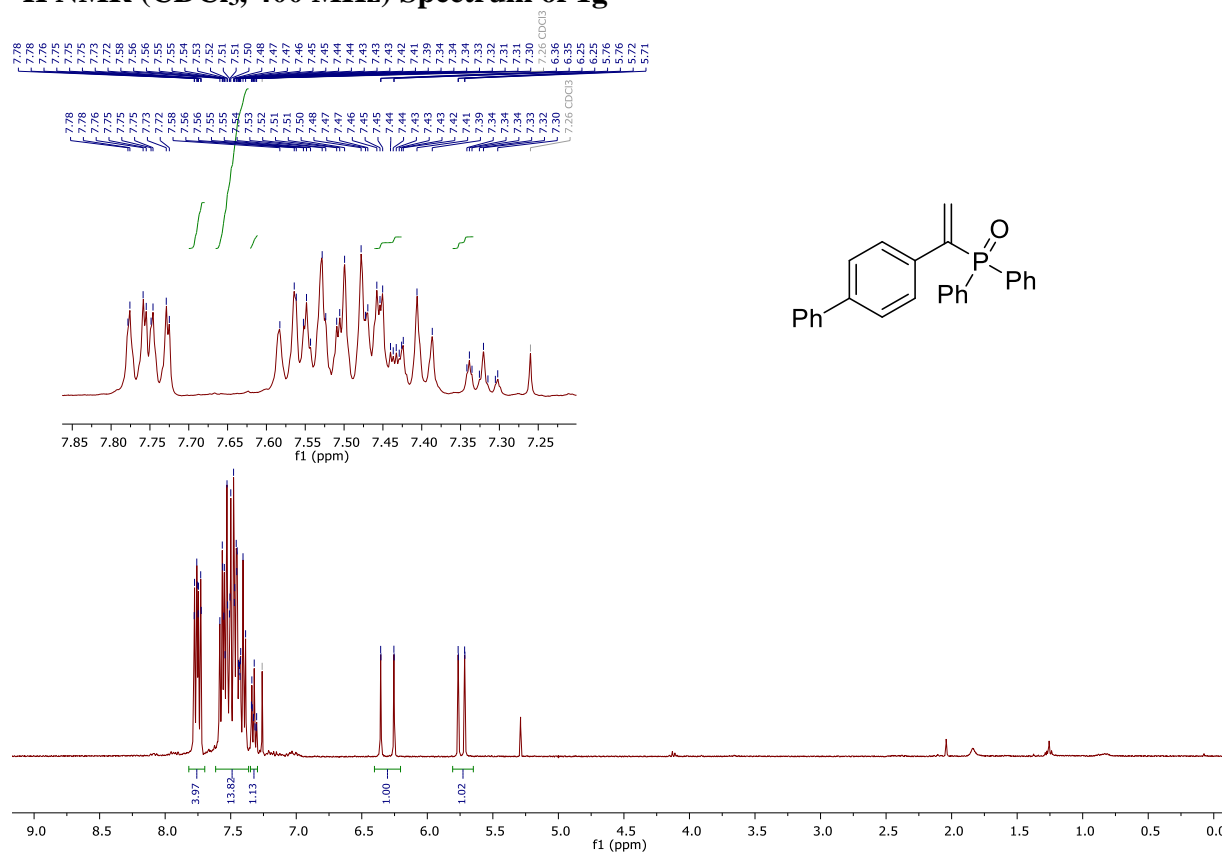

### $^{13}\text{C}$ NMR ( $\text{CDCl}_3$ , 101 MHz) Spectrum of **1g**

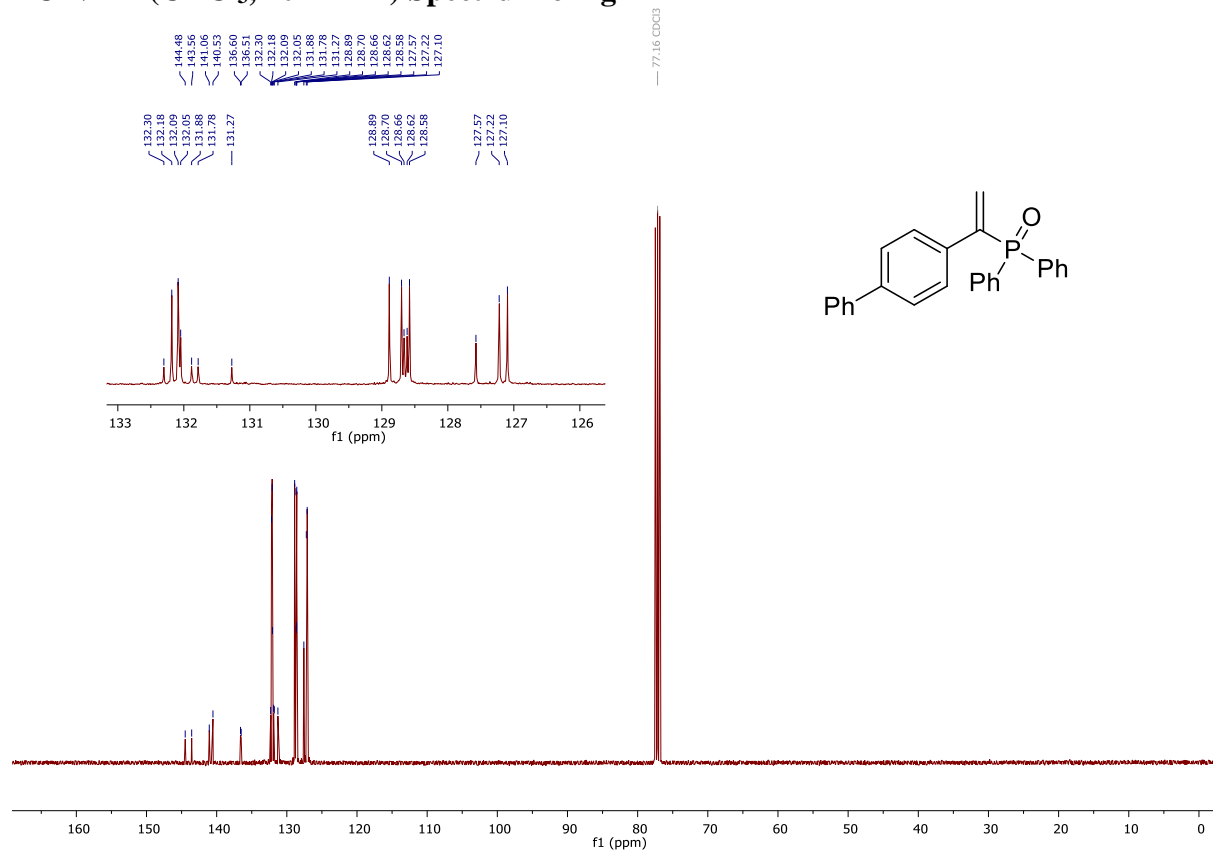

### $^{31}\text{P}$ NMR ( $\text{CDCl}_3$ , 162 MHz) Spectrum of **1g**

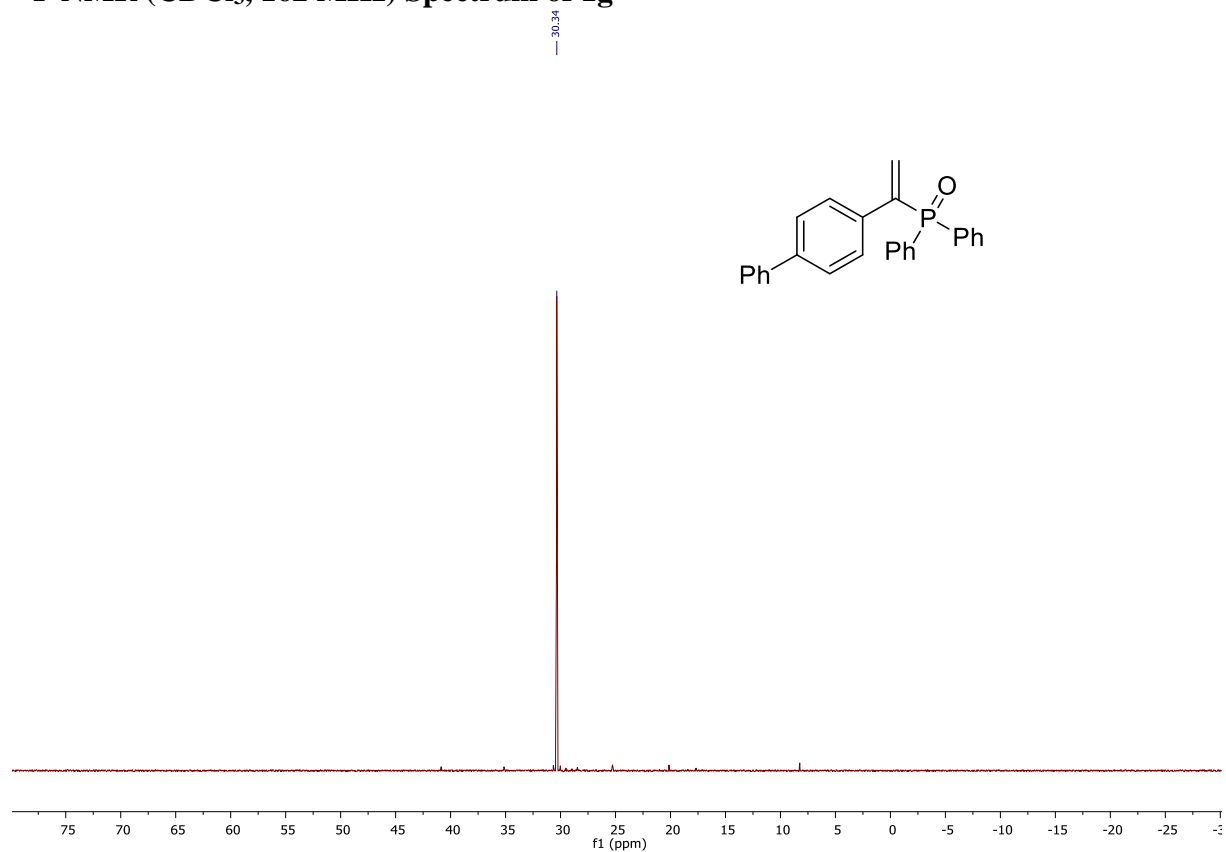

### <sup>1</sup>H NMR (CDCl<sub>3</sub>, 400 MHz) Spectrum of 1h

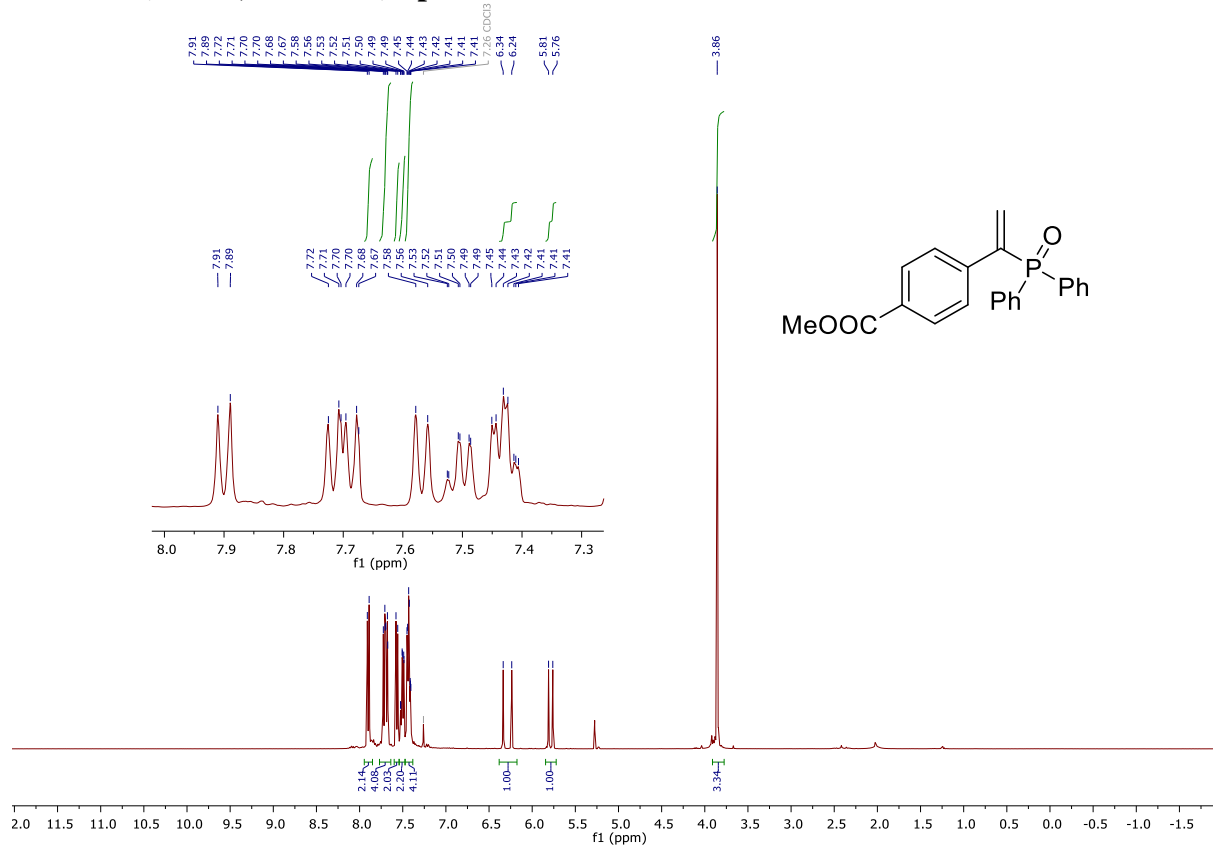

### <sup>13</sup>C NMR (CDCl<sub>3</sub>, 101 MHz) Spectrum of 1h

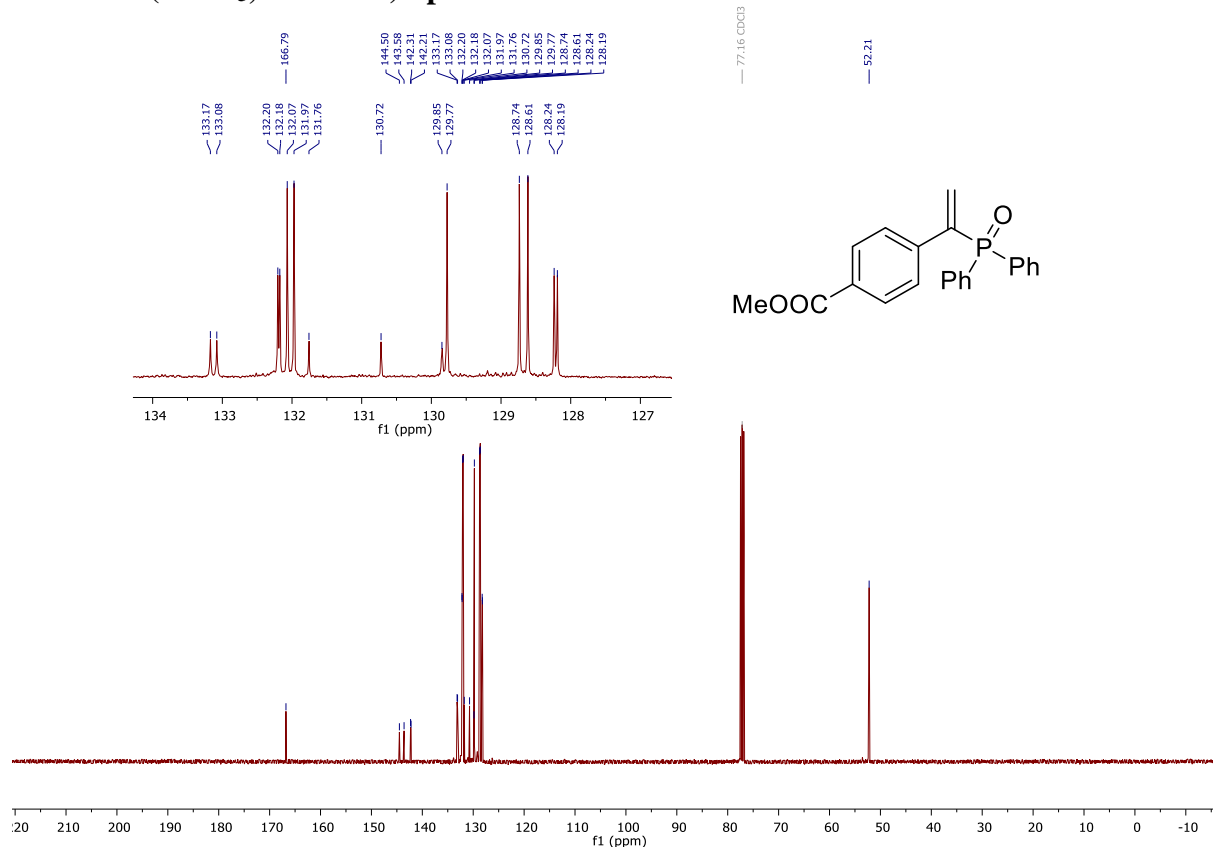

### <sup>31</sup>P NMR (CDCl<sub>3</sub>, 162 MHz) Spectrum of 1h

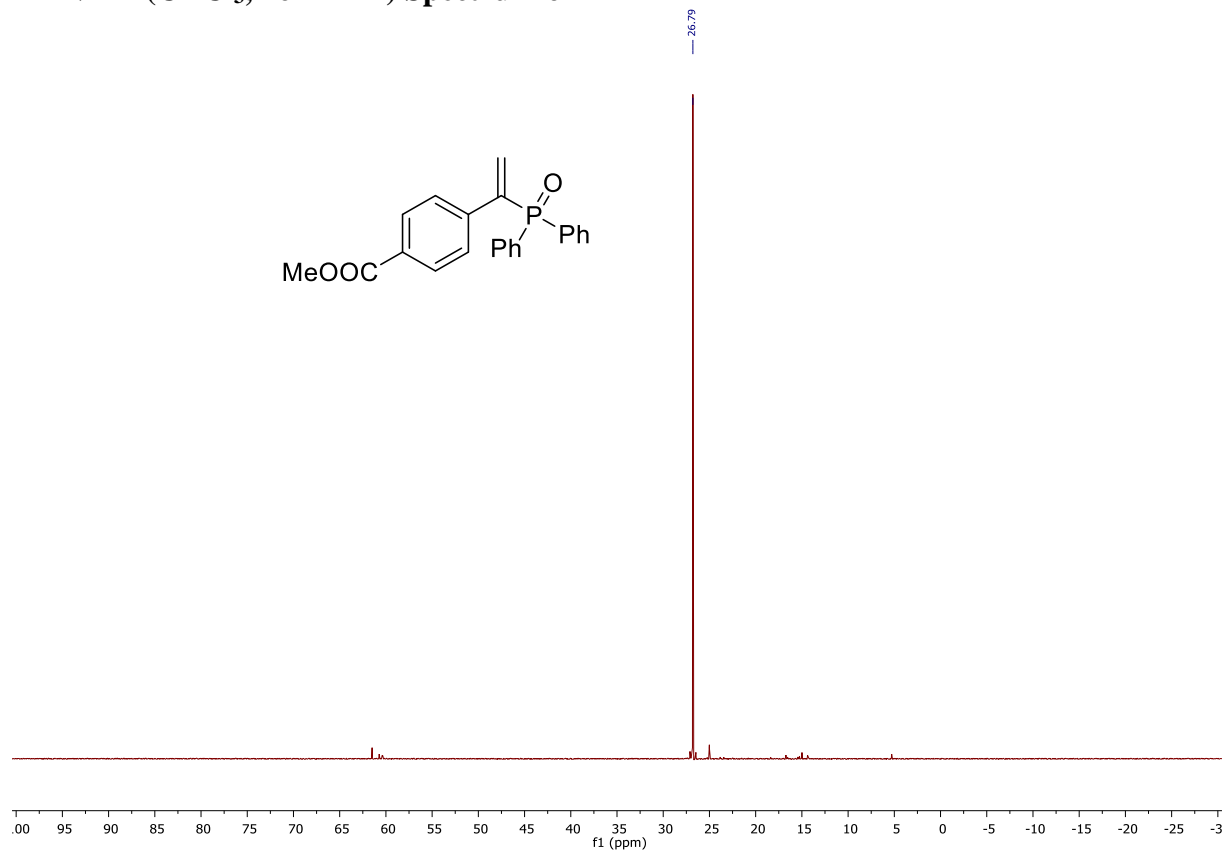

### <sup>1</sup>H NMR (CDCl<sub>3</sub>, 400 MHz) Spectrum of 1i

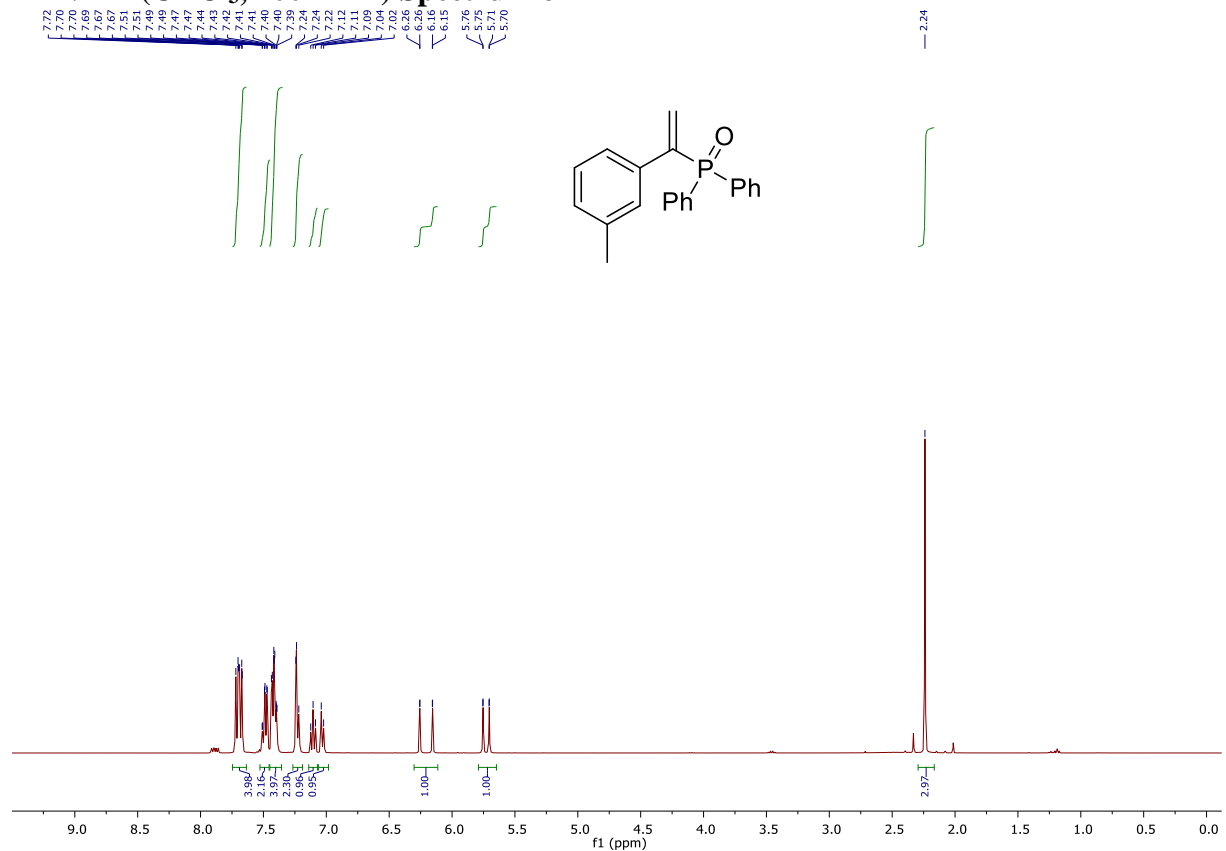

### <sup>13</sup>C NMR (CDCl<sub>3</sub>, 101 MHz) Spectrum of **1i**

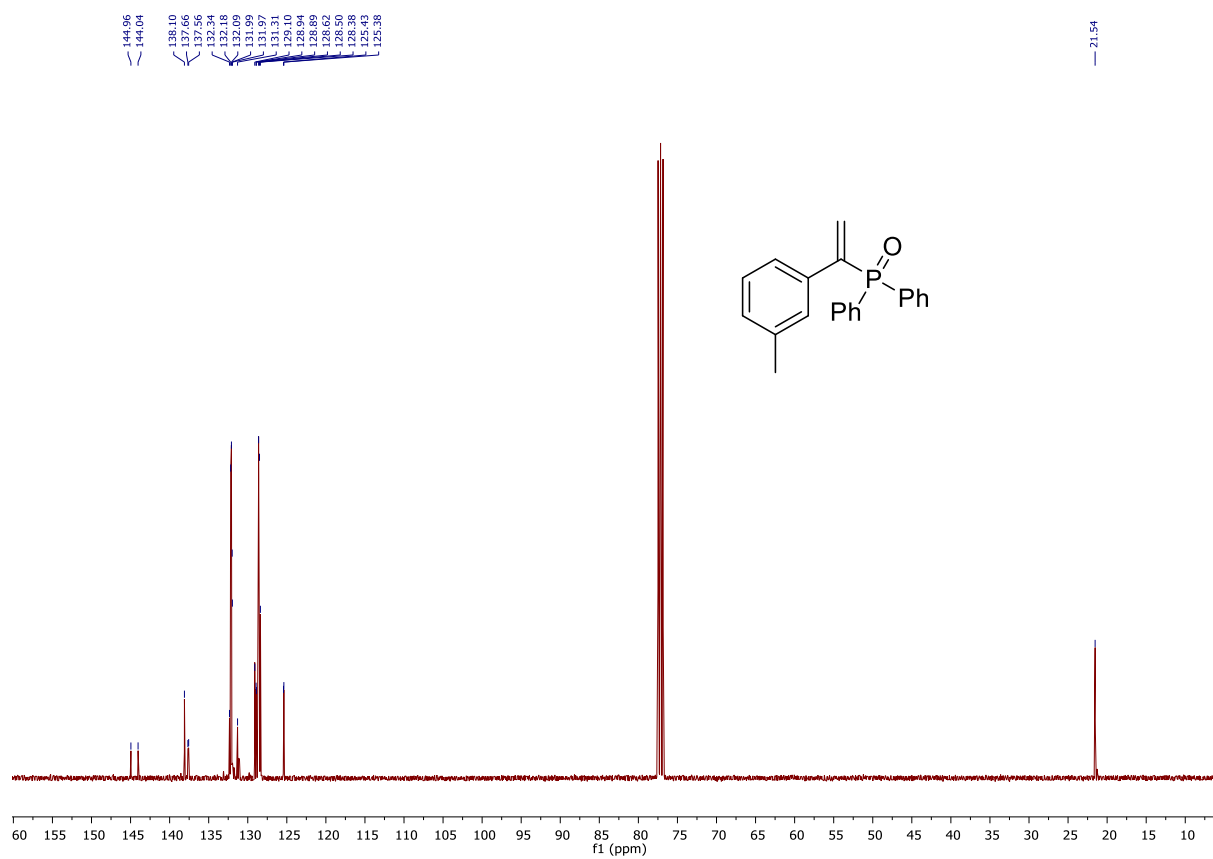

### <sup>31</sup>P NMR (CDCl<sub>3</sub>, 162 MHz) Spectrum of **1i**

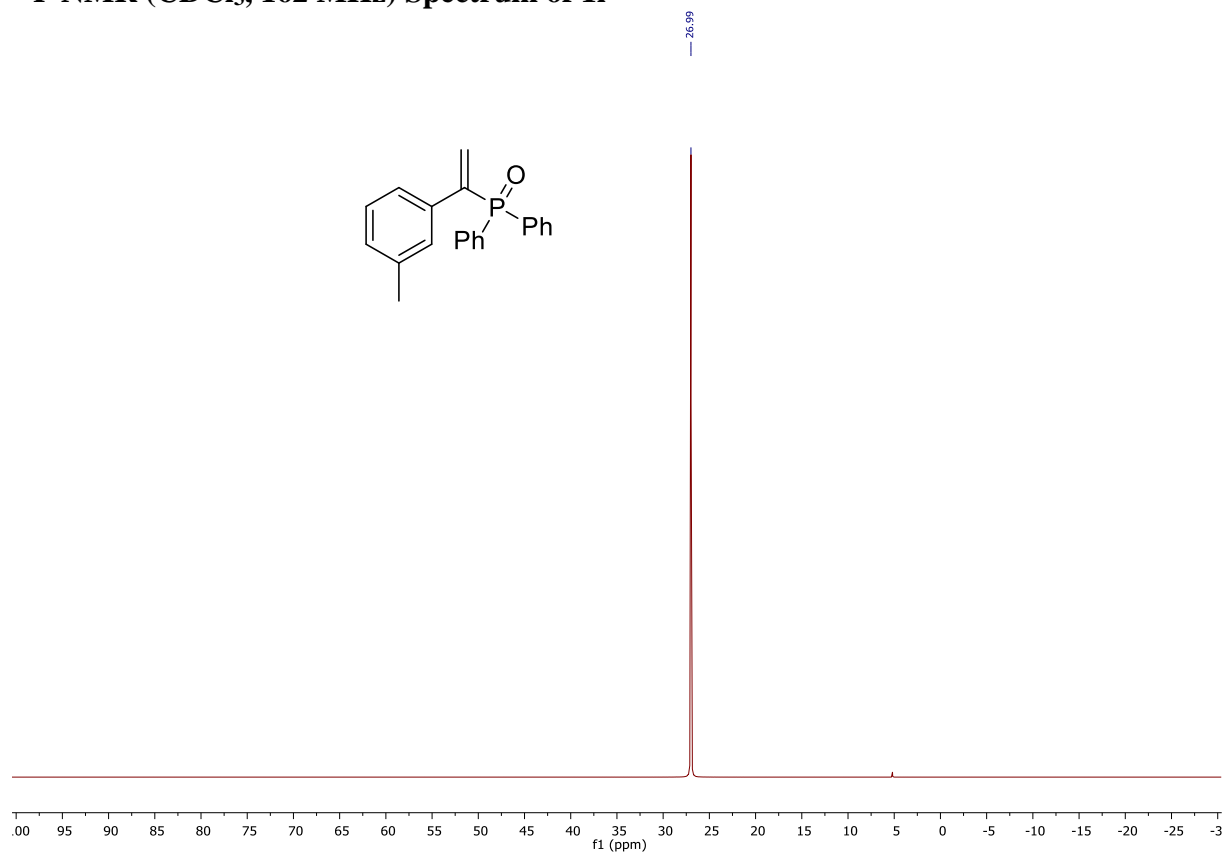

# <sup>1</sup>H NMR (CDCl<sub>3</sub>, 400 MHz) Spectrum of 1j

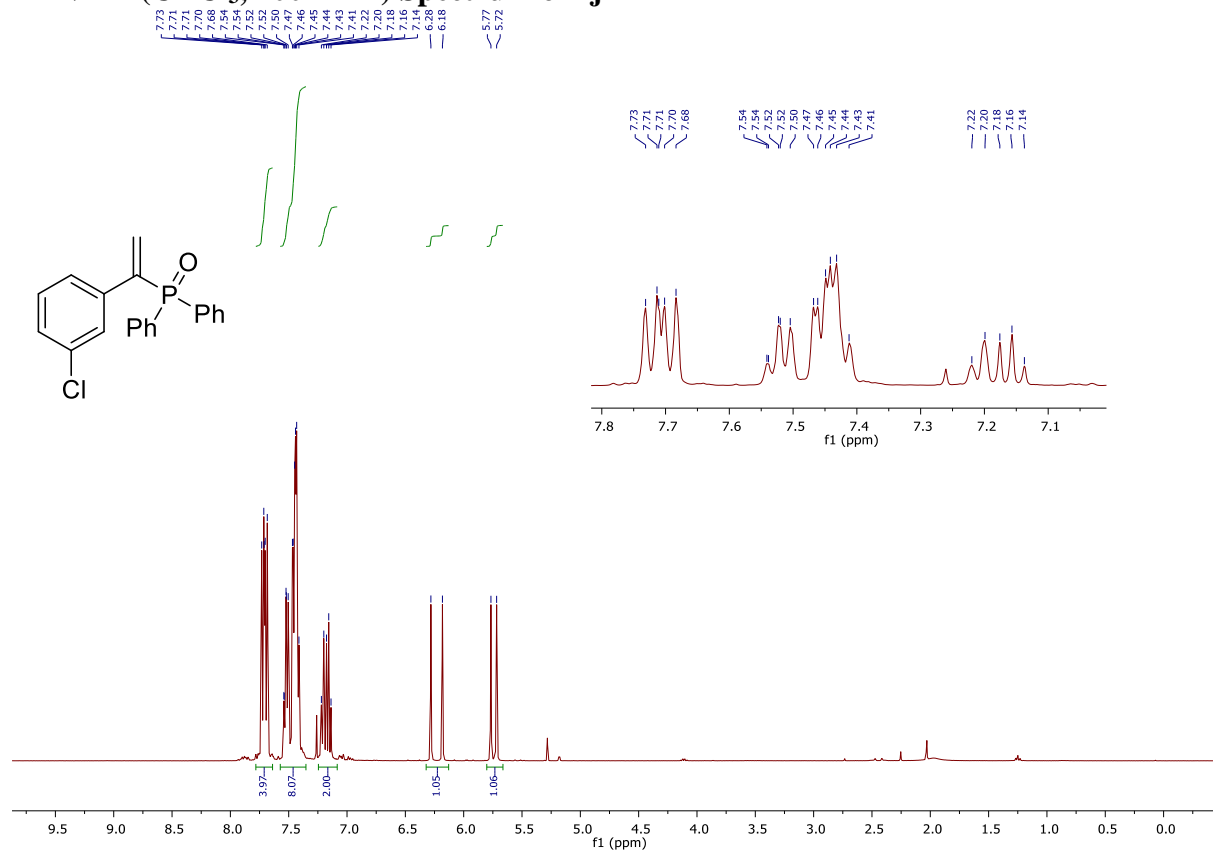

# <sup>13</sup>C NMR (CDCl<sub>3</sub>, 101 MHz) Spectrum of 1j

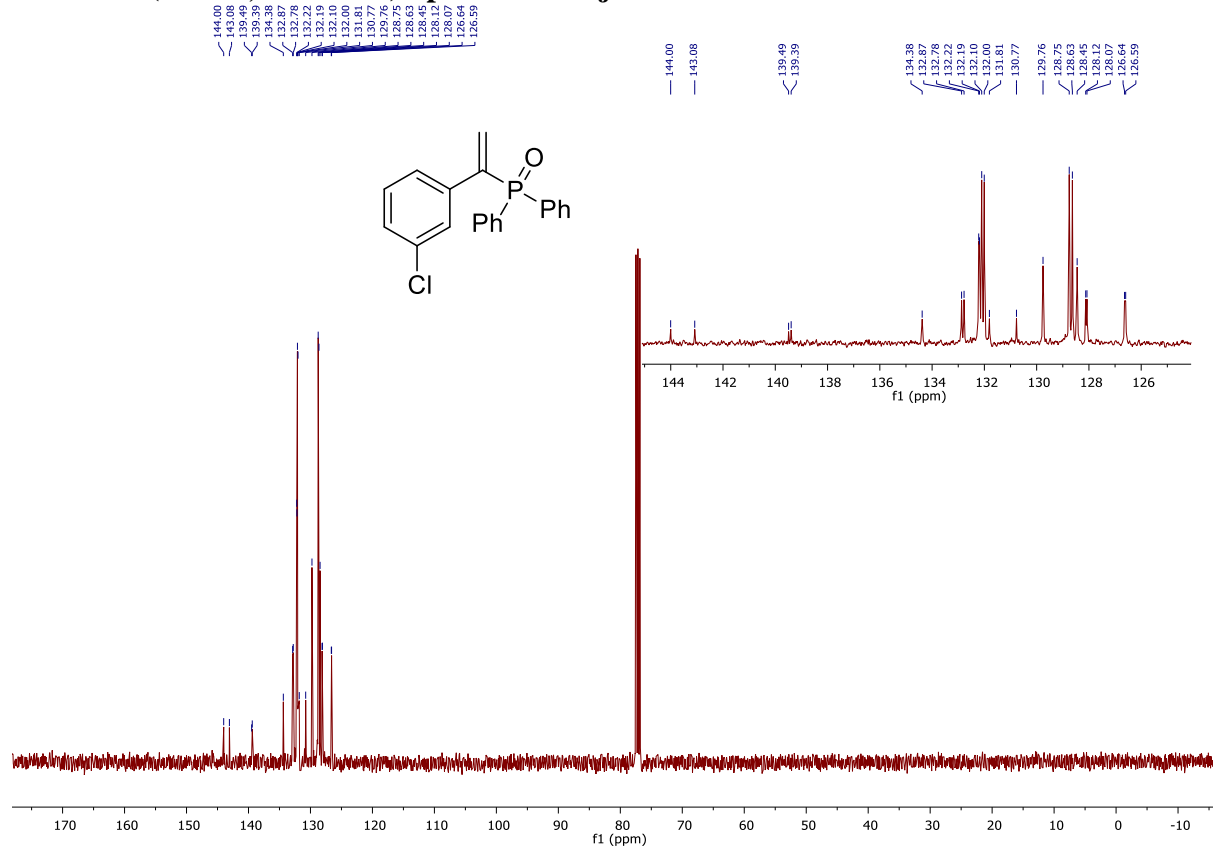



### <sup>31</sup>P NMR (CDCl<sub>3</sub>, 162 MHz) Spectrum of 1j

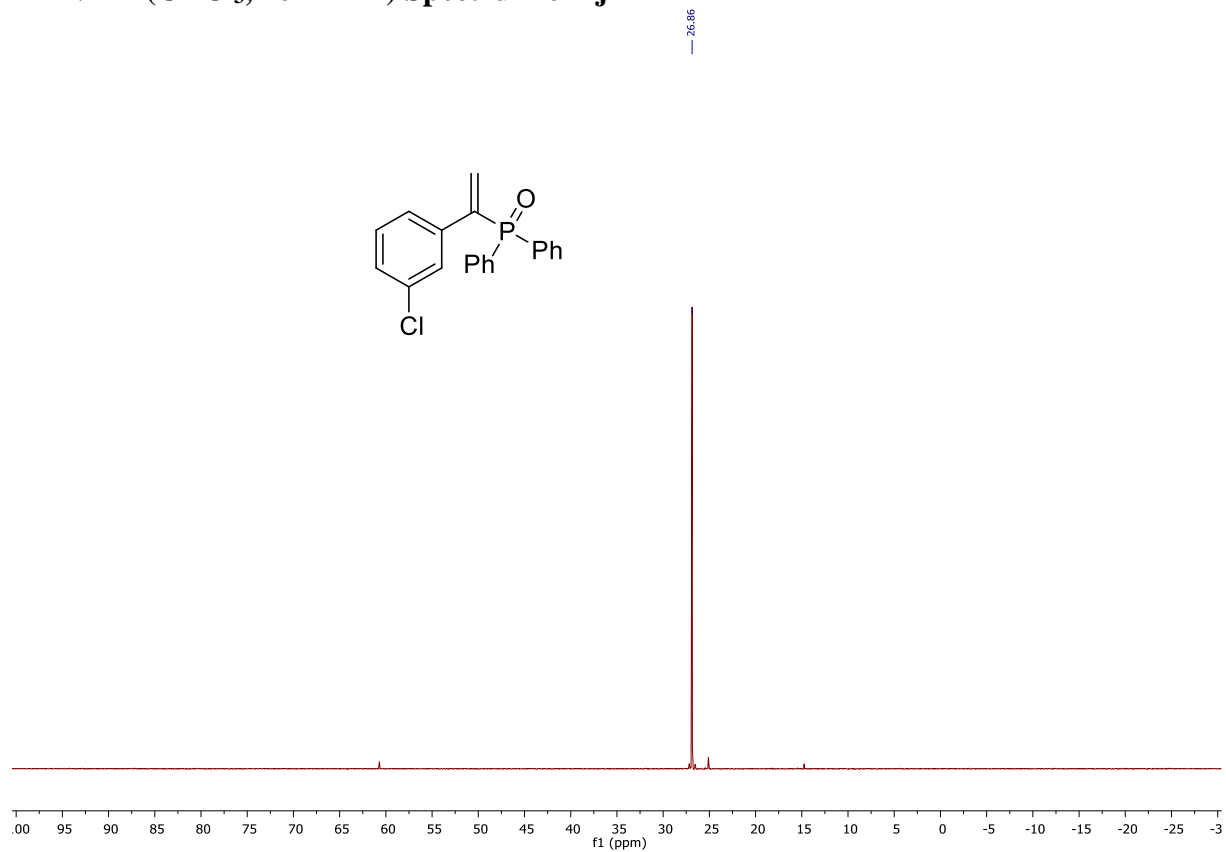

### <sup>1</sup>H NMR (CDCl<sub>3</sub>, 400 MHz) Spectrum of 1k

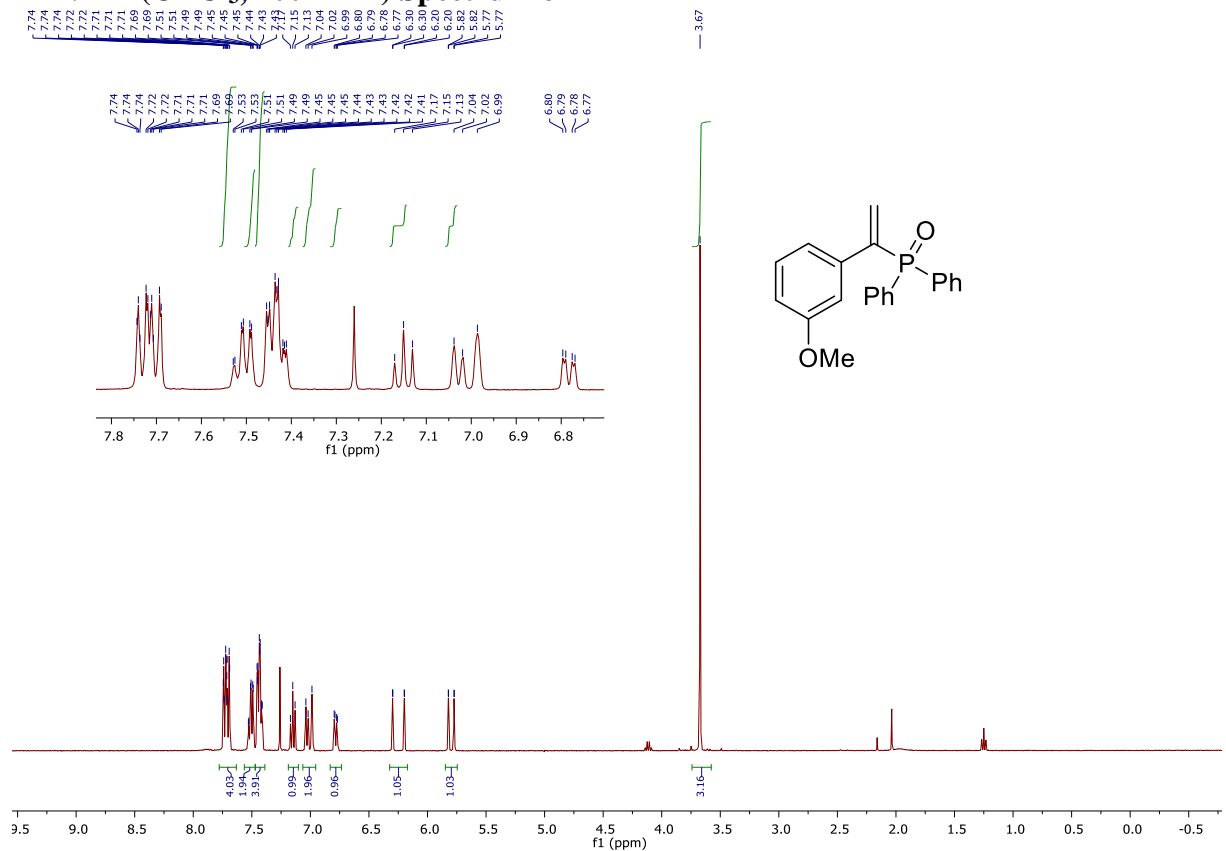

### <sup>13</sup>C NMR (CDCl<sub>3</sub>, 101 MHz) Spectrum of 1k

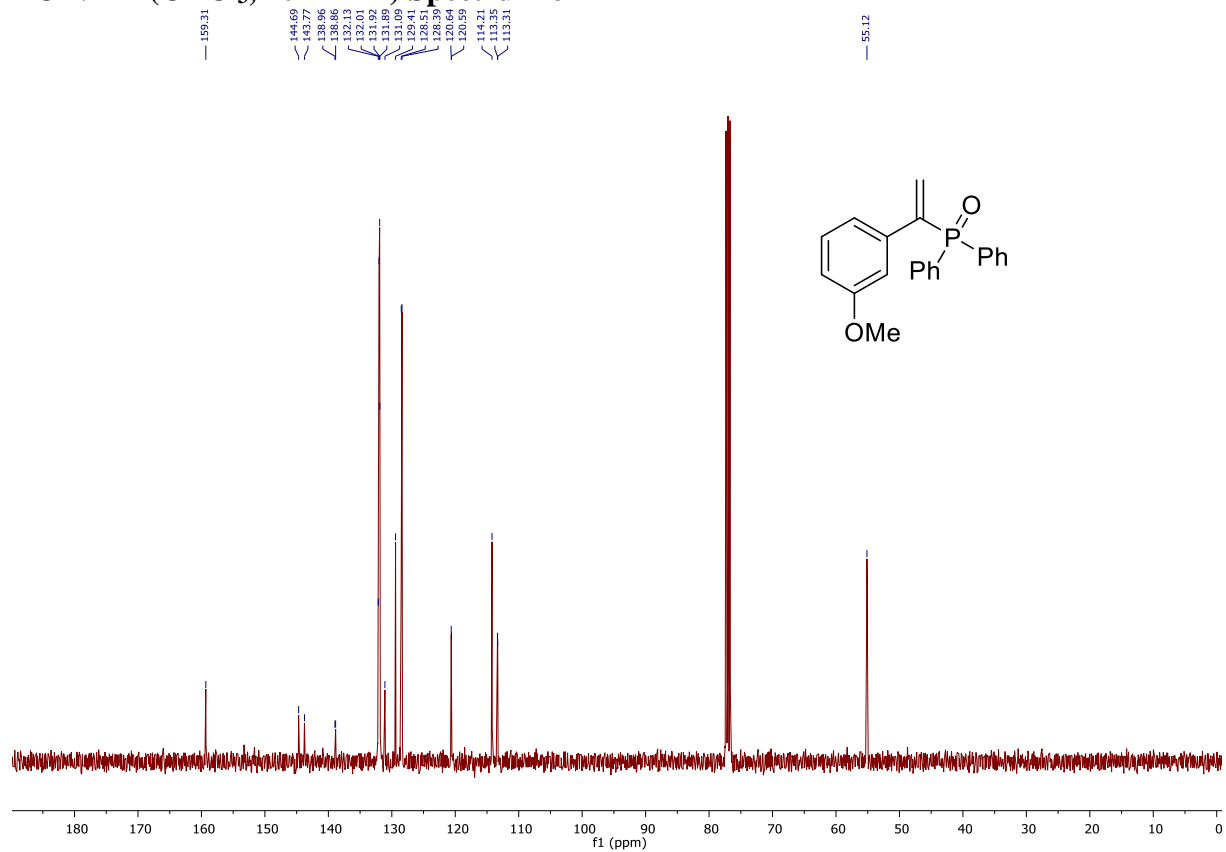

### <sup>31</sup>P NMR (CDCl<sub>3</sub>, 162 MHz) Spectrum of 1k

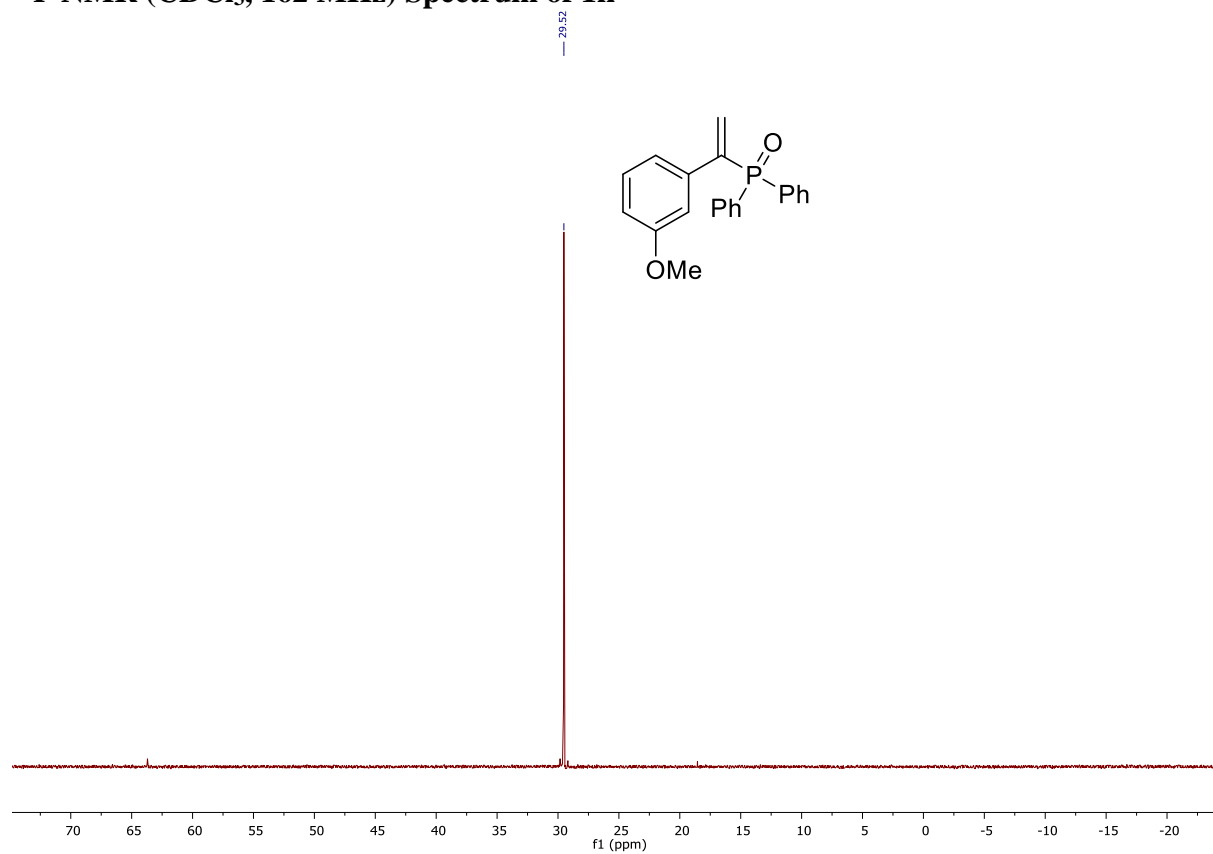



### <sup>31</sup>P NMR (CDCl<sub>3</sub>, 162 MHz) Spectrum of 1l

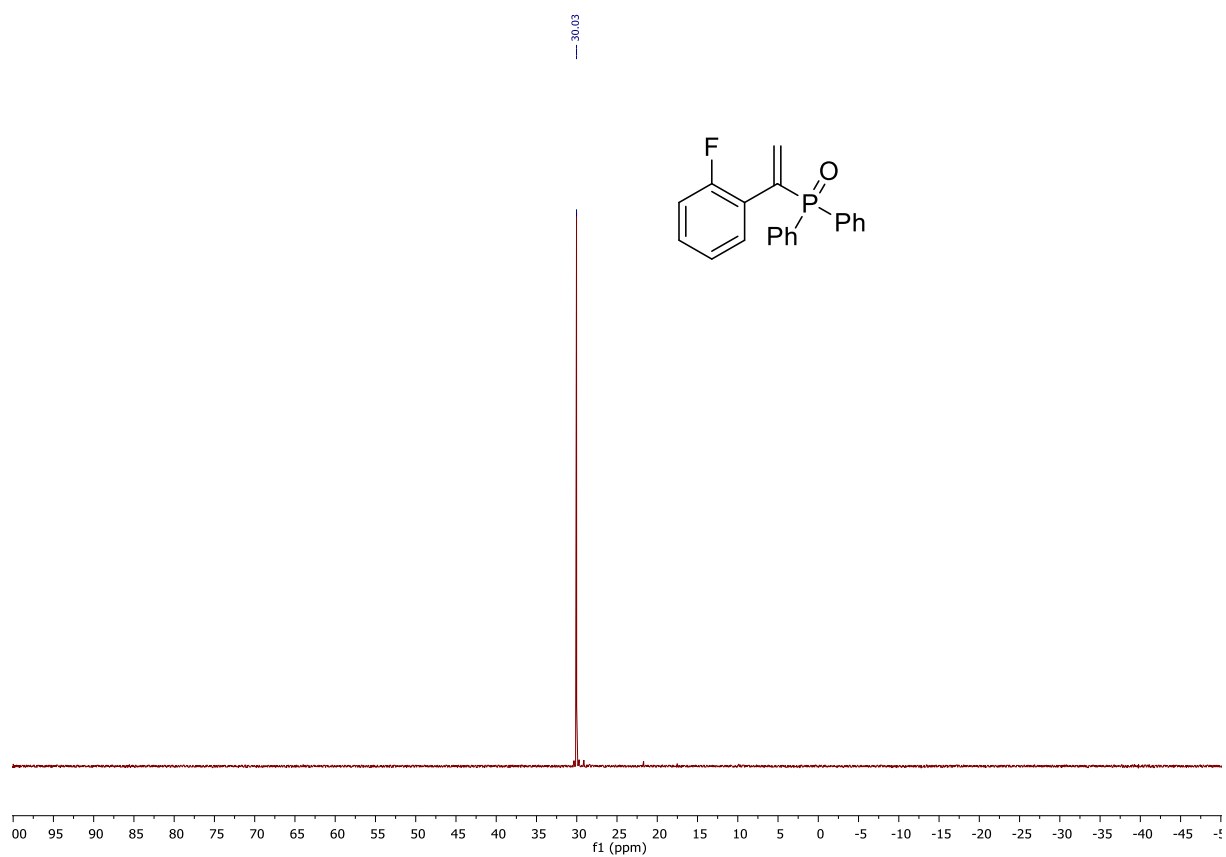

### <sup>1</sup>H NMR (CDCl<sub>3</sub>, 400 MHz) Spectrum of 1n

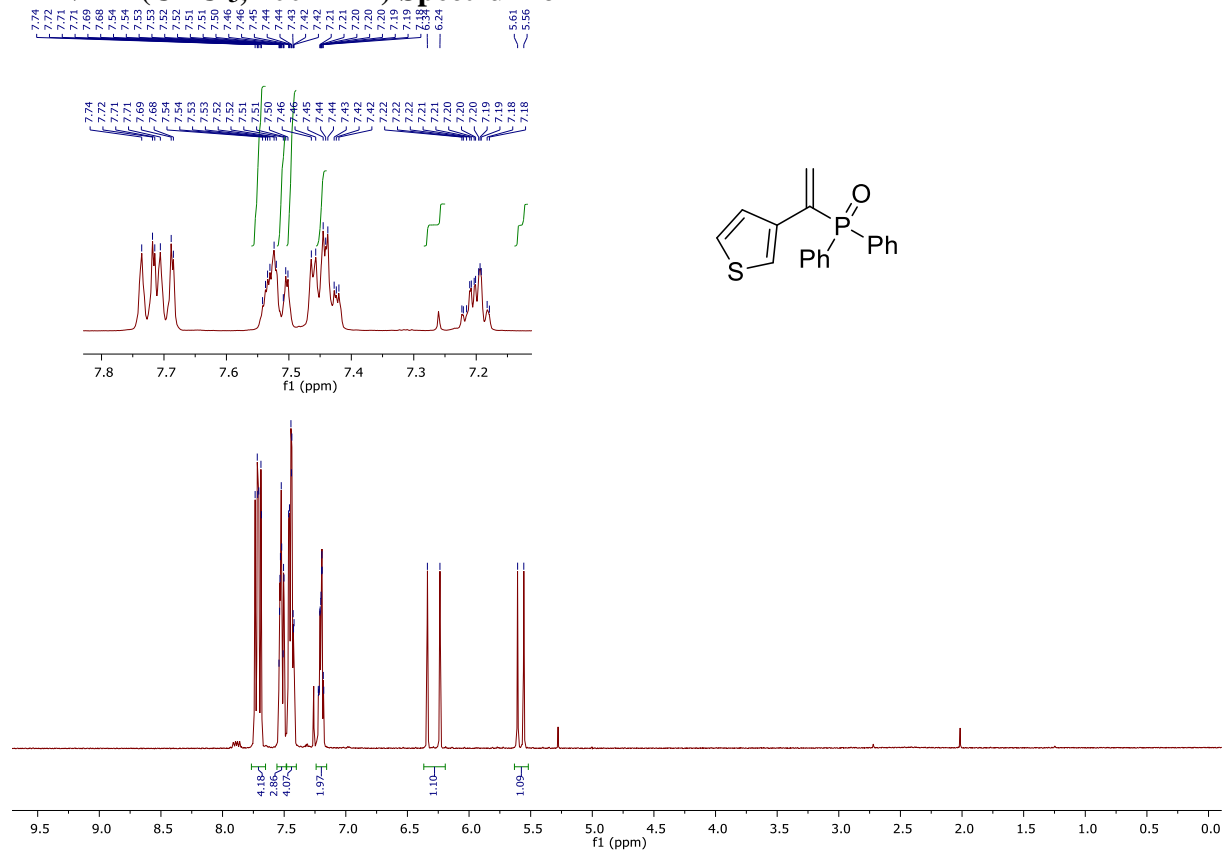

### <sup>13</sup>C NMR (CDCl<sub>3</sub>, 101 MHz) Spectrum of **1n**

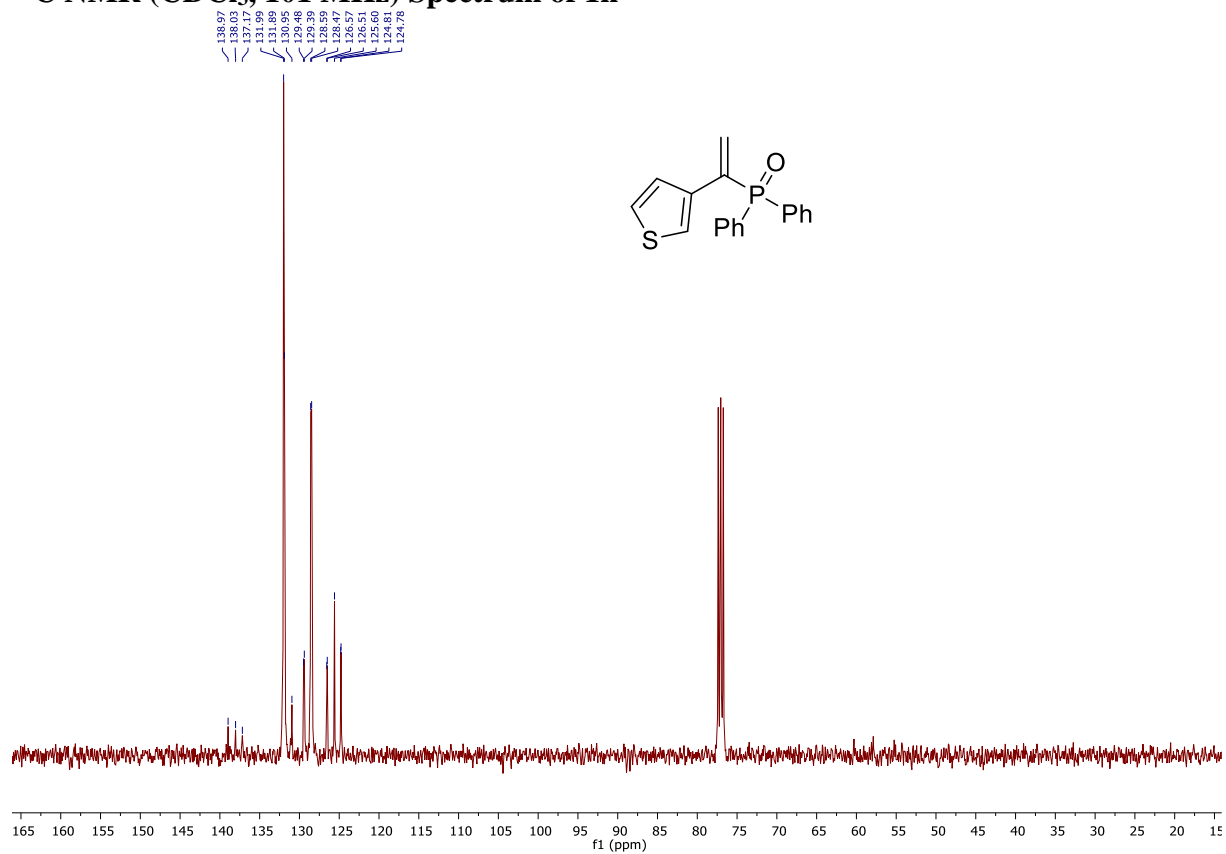

### <sup>31</sup>P NMR (CDCl<sub>3</sub>, 162 MHz) Spectrum of **1n**

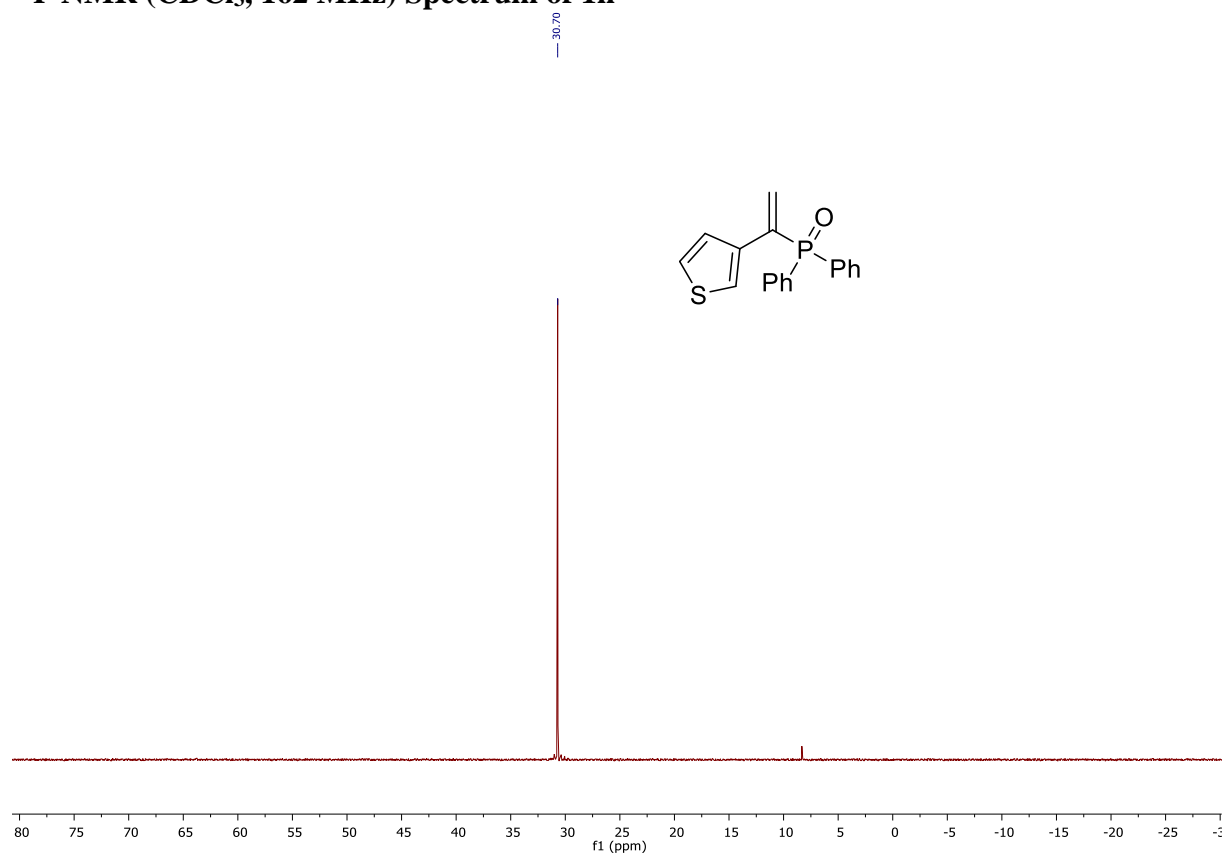

### <sup>1</sup>H NMR (CDCl<sub>3</sub>, 400 MHz) Spectrum of 1o

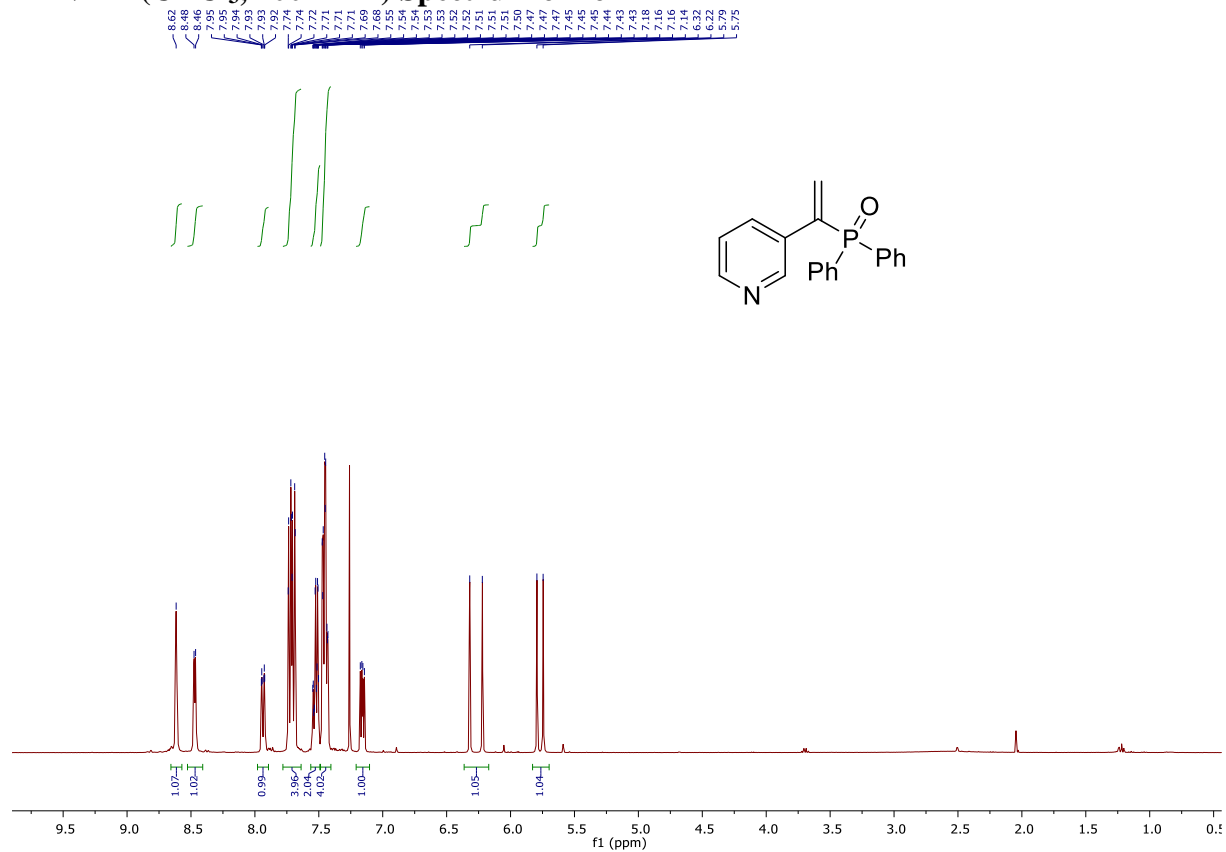

### <sup>13</sup>C NMR (CDCl<sub>3</sub>, 101 MHz) Spectrum of 1o

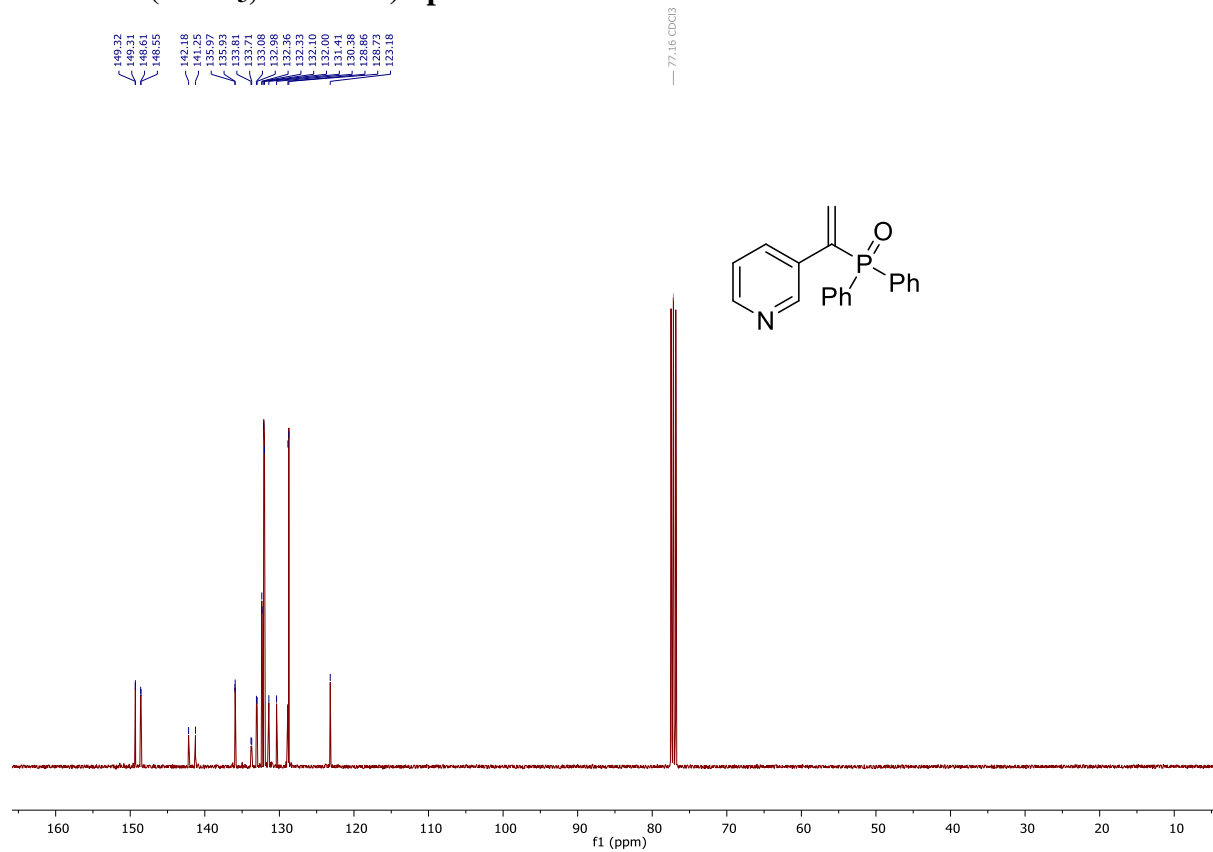

### <sup>31</sup>P NMR (CDCl<sub>3</sub>, 162 MHz) Spectrum of 1o

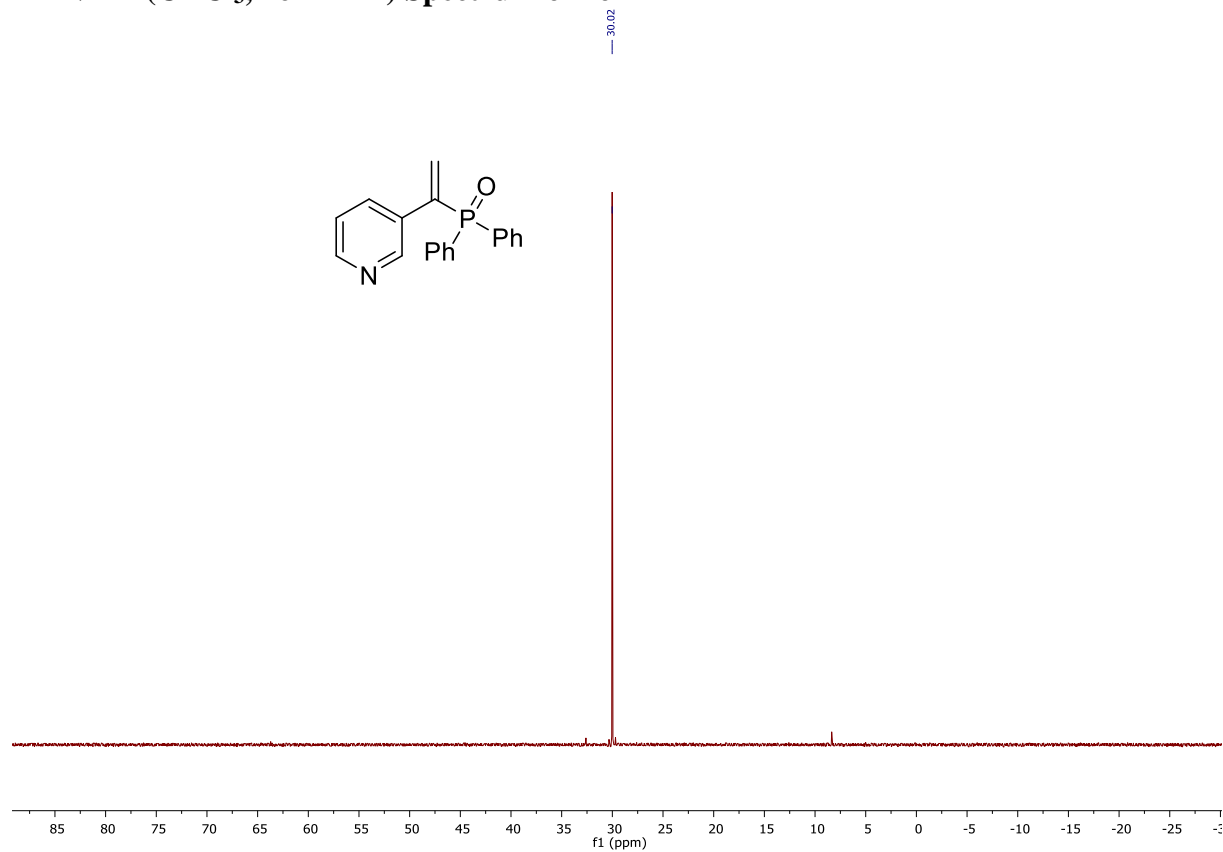

### <sup>1</sup>H NMR (CDCl<sub>3</sub>, 400 MHz) Spectrum of 1q

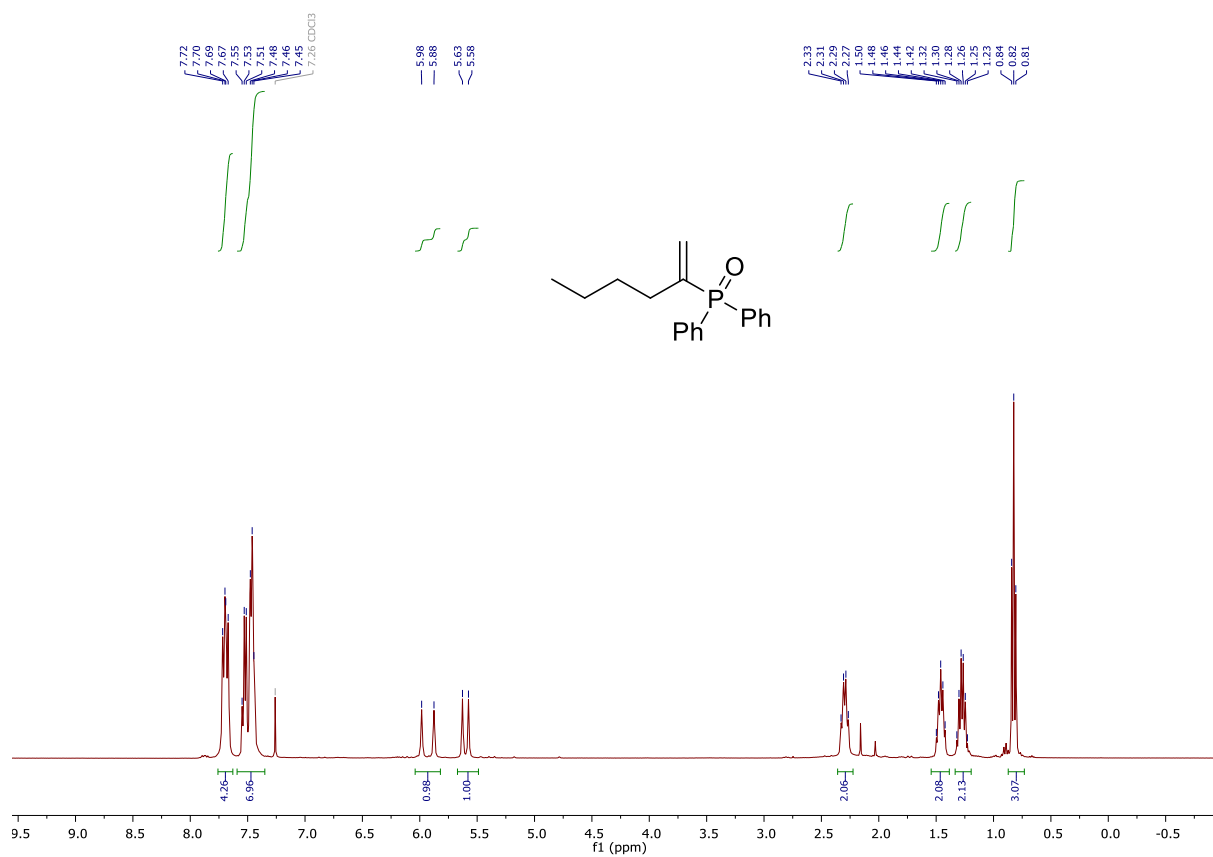

### <sup>13</sup>C NMR (CDCl<sub>3</sub>, 101 MHz) Spectrum of 1q

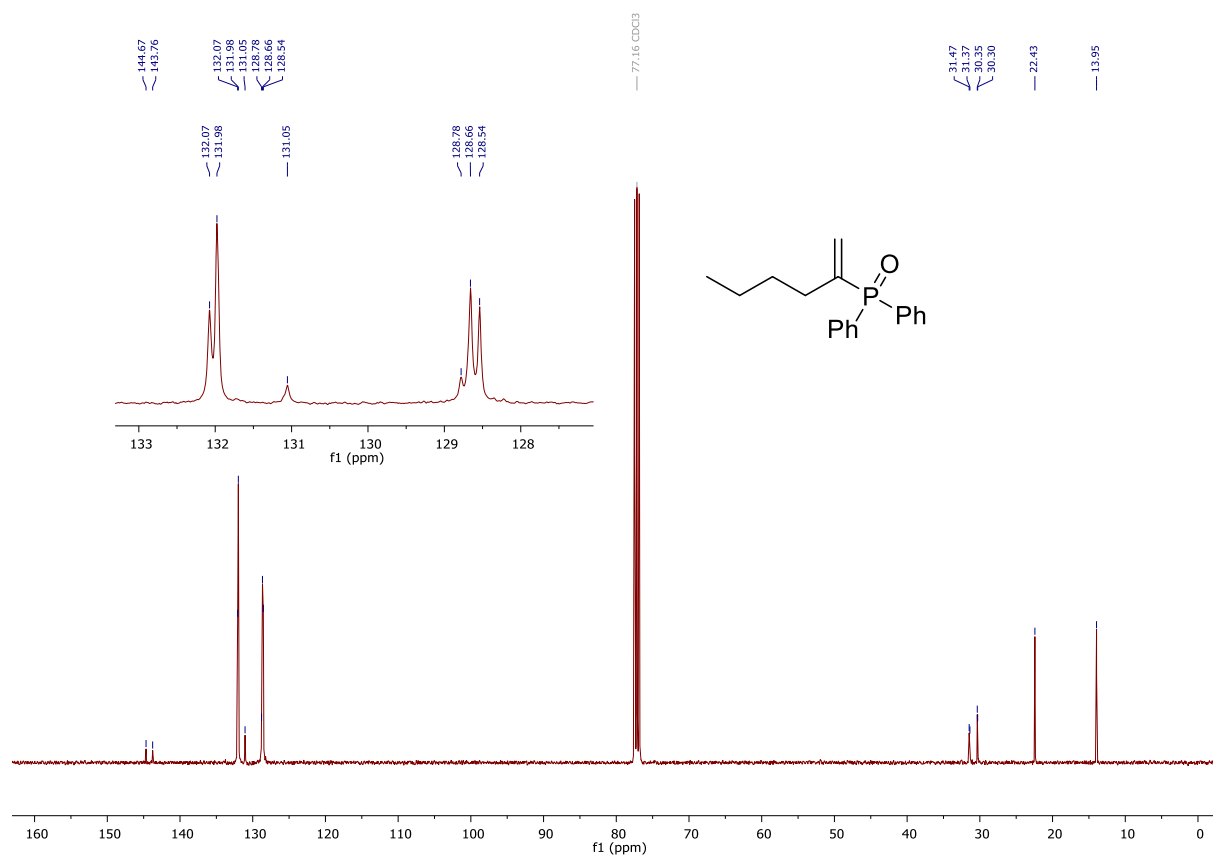

### <sup>31</sup>P NMR (CDCl<sub>3</sub>, 162 MHz) Spectrum of 1q

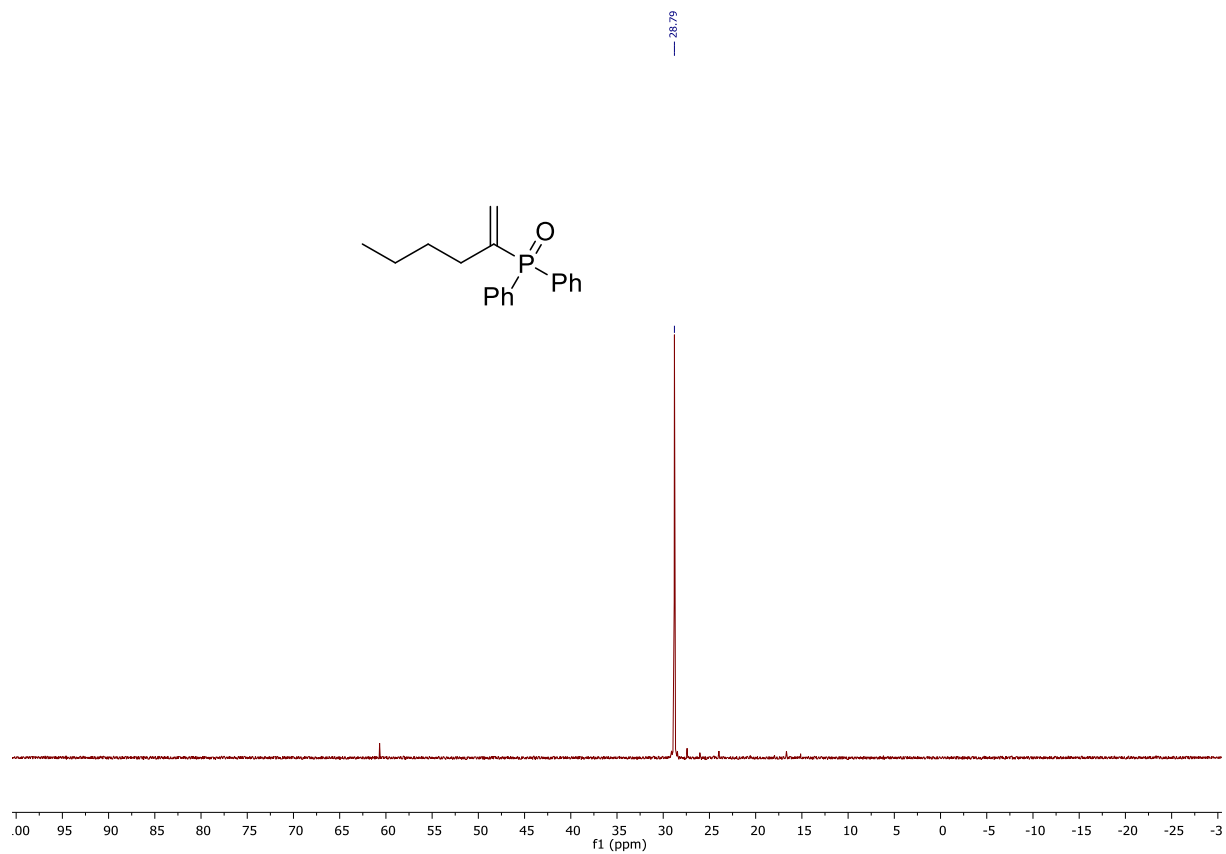



# <sup>1</sup>H NMR (CDCl<sub>3</sub>, 400 MHz) Spectrum of 1r

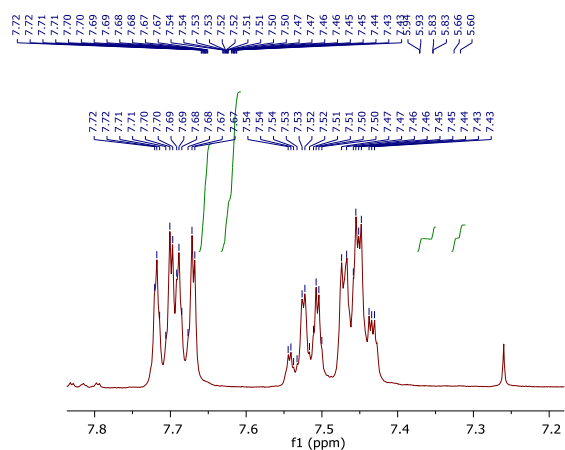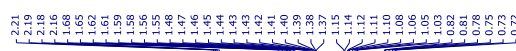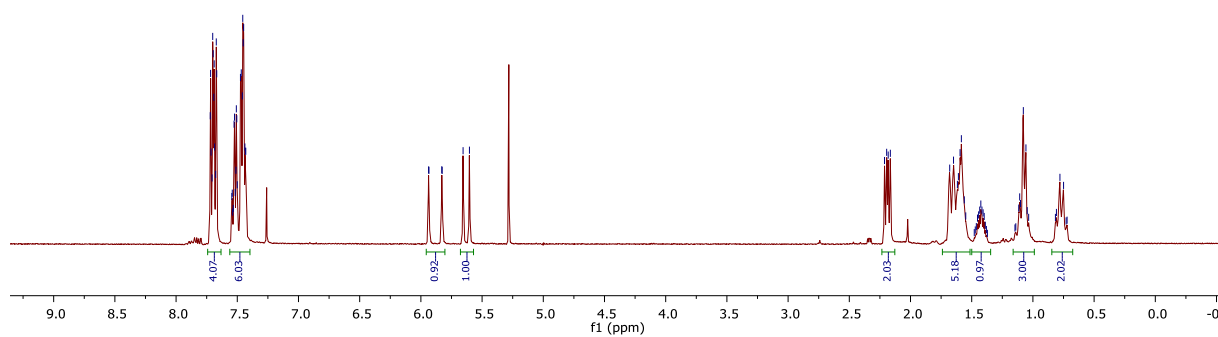

# <sup>13</sup>C NMR (CDCl<sub>3</sub>, 101 MHz) Spectrum of 1r

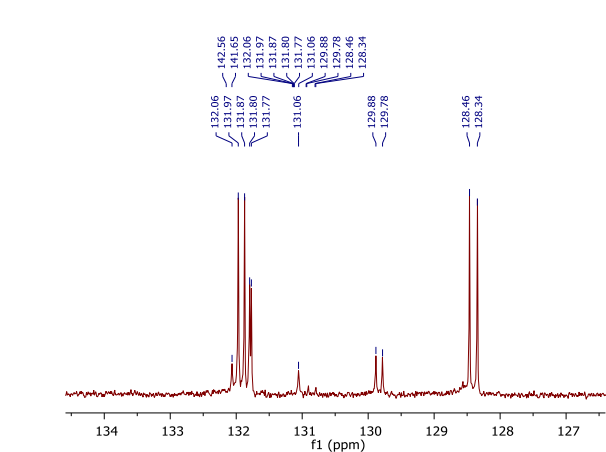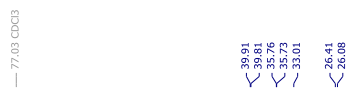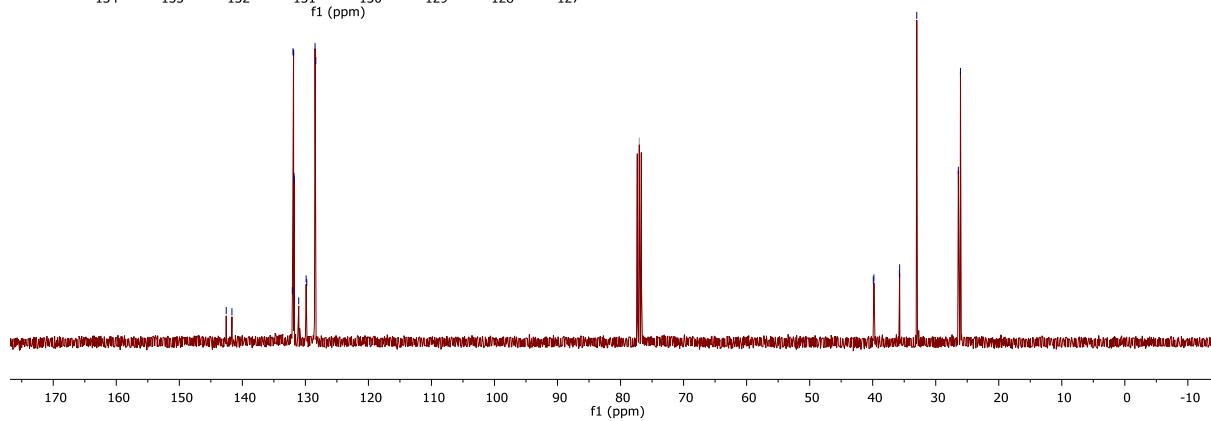

### $^{31}\text{P}$ NMR ( $\text{CDCl}_3$ , 162 MHz) Spectrum of 1r

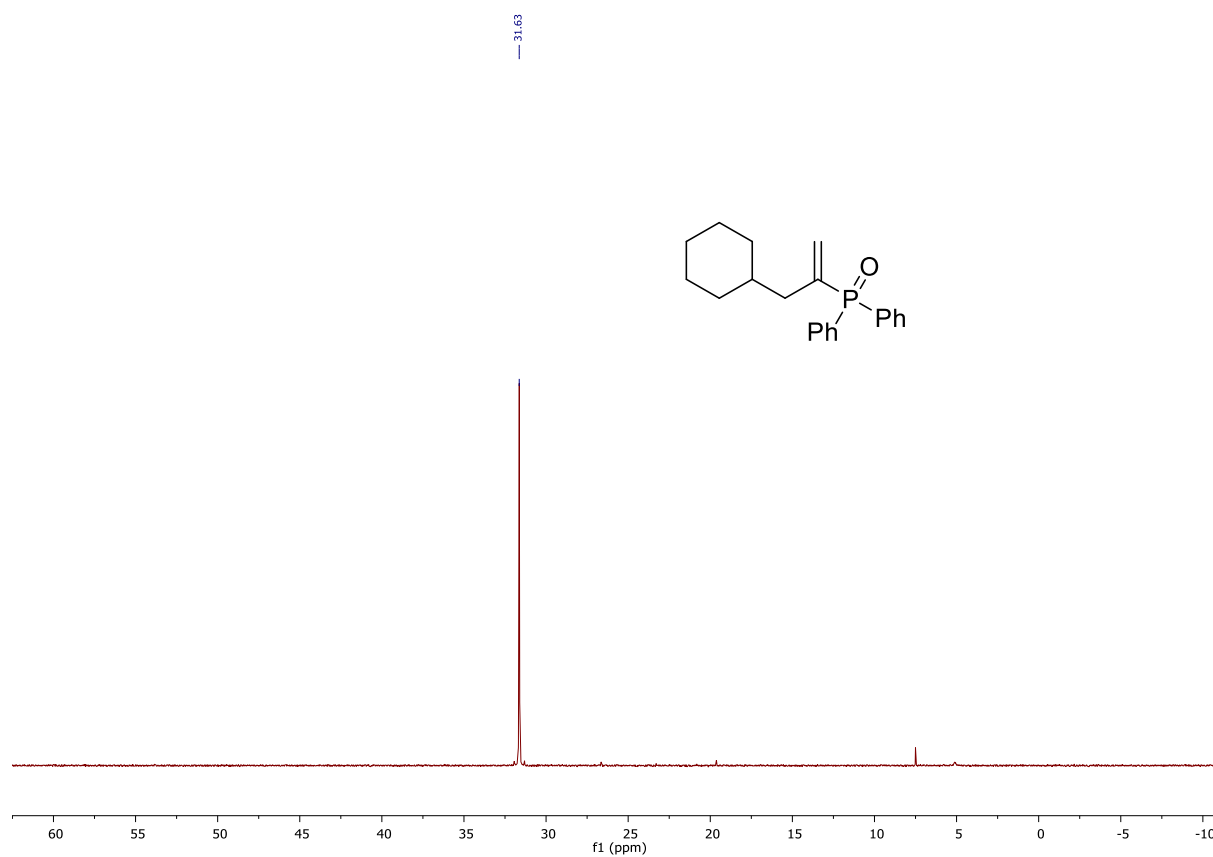

### $^1\text{H}$ NMR ( $\text{CDCl}_3$ , 400 MHz) Spectrum of 1s

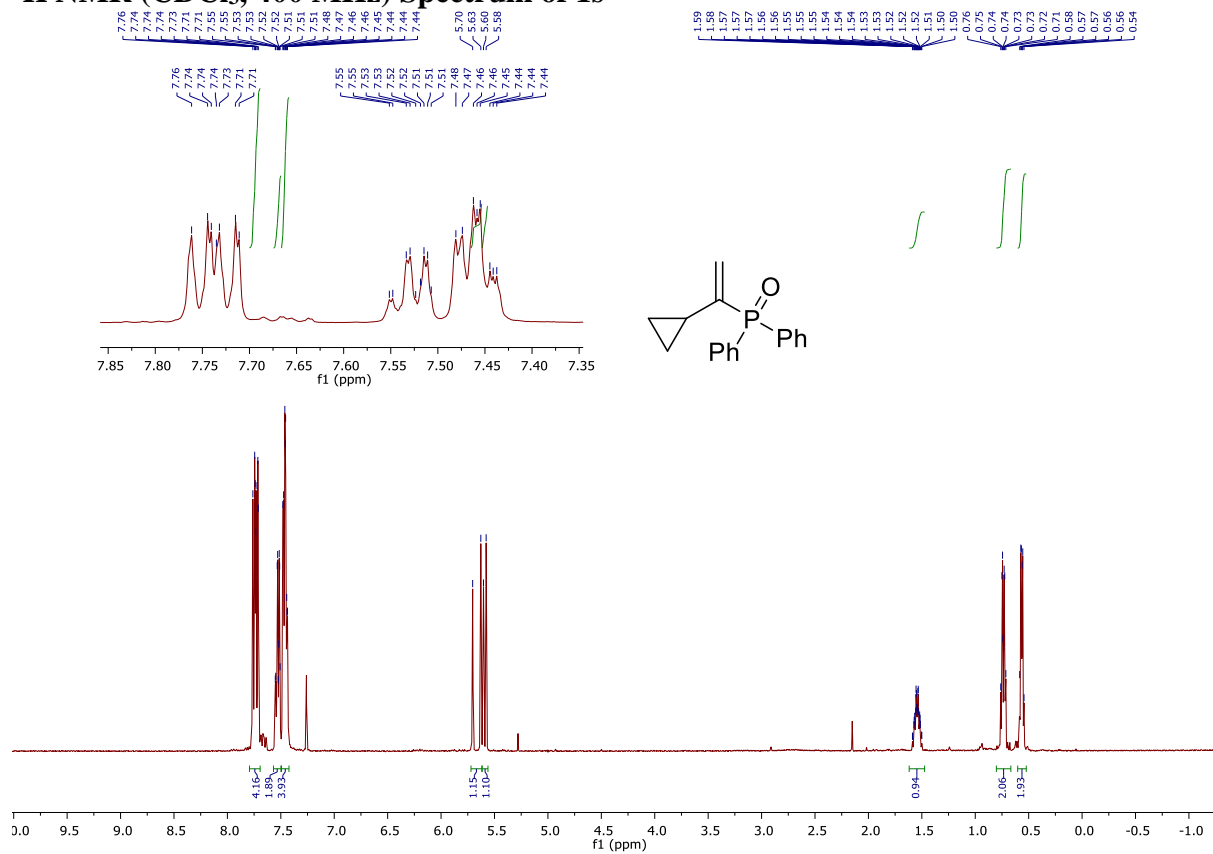

### <sup>13</sup>C NMR (CDCl<sub>3</sub>, 101 MHz) Spectrum of 1s

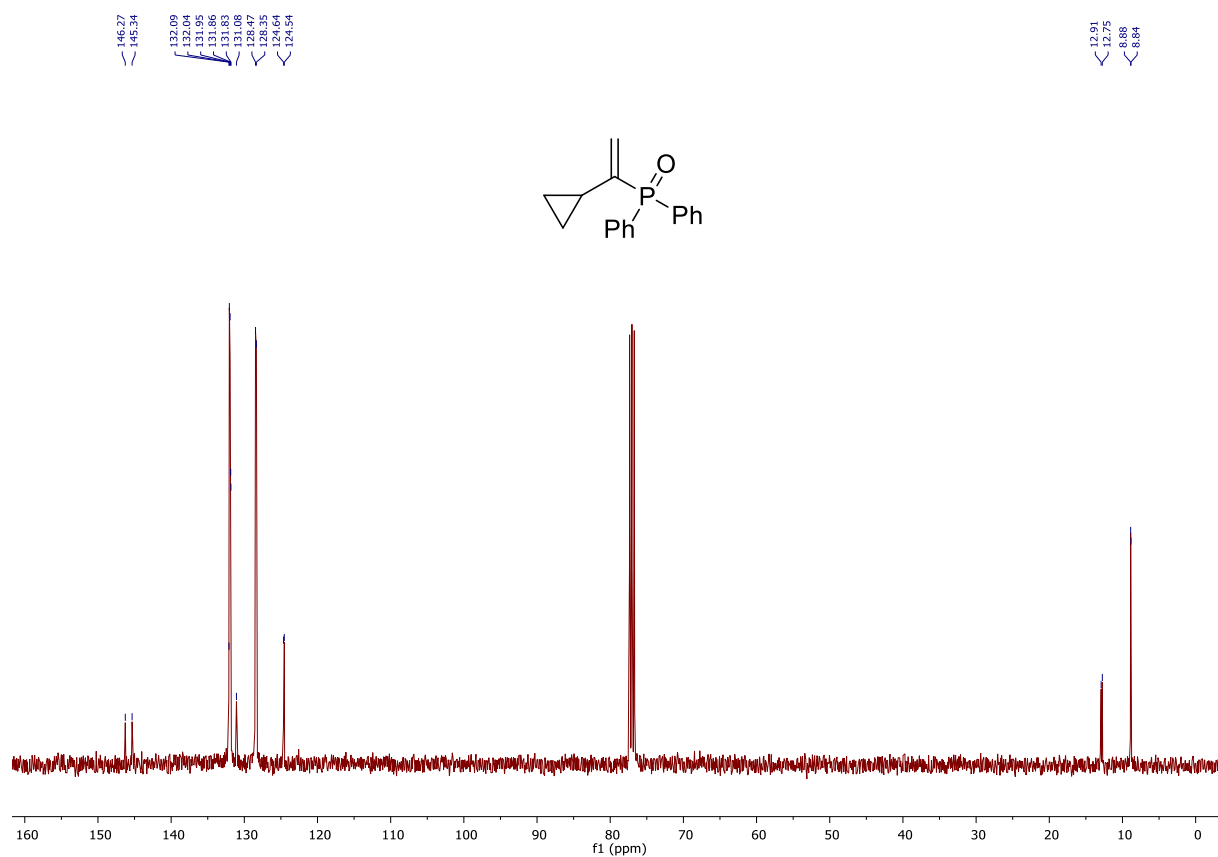

### <sup>31</sup>P NMR (CDCl<sub>3</sub>, 162 MHz) Spectrum of 1s

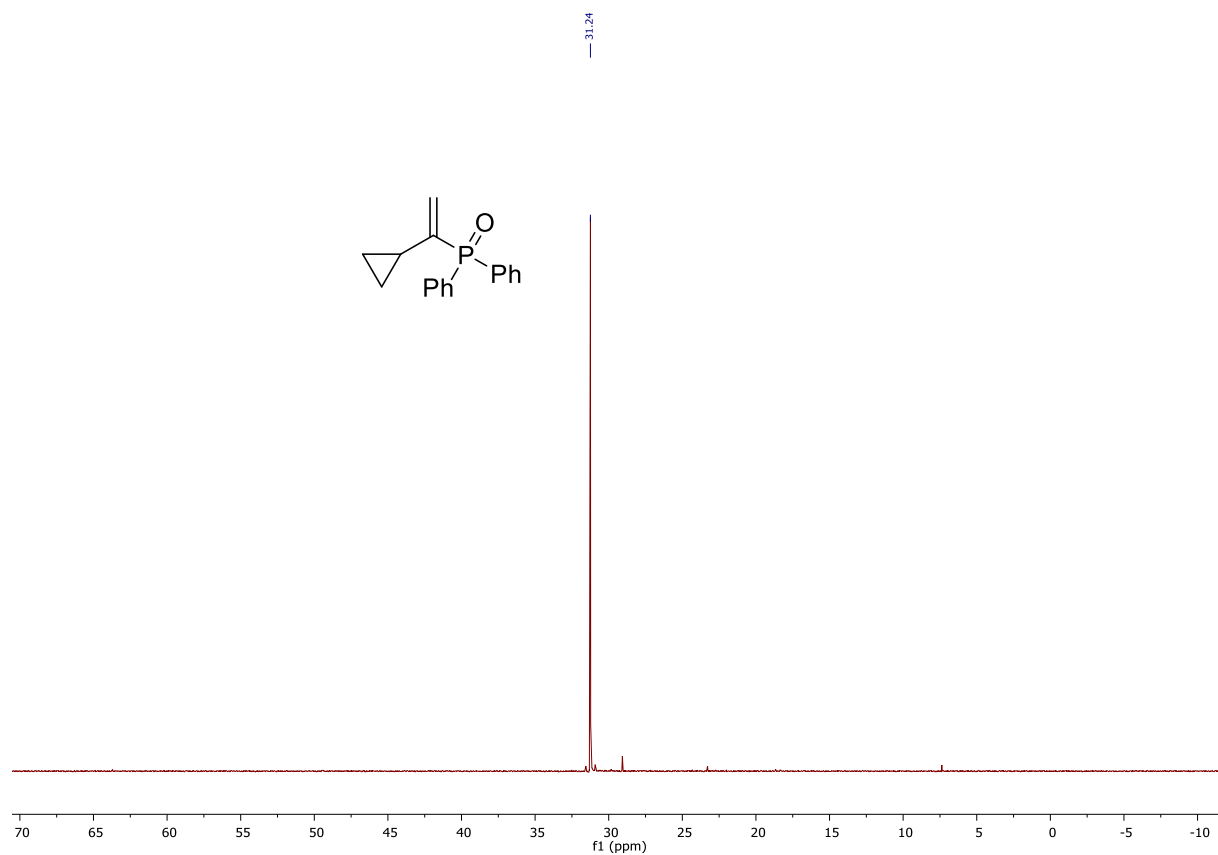

### <sup>1</sup>H NMR (CDCl<sub>3</sub>, 400 MHz) Spectrum of 1u

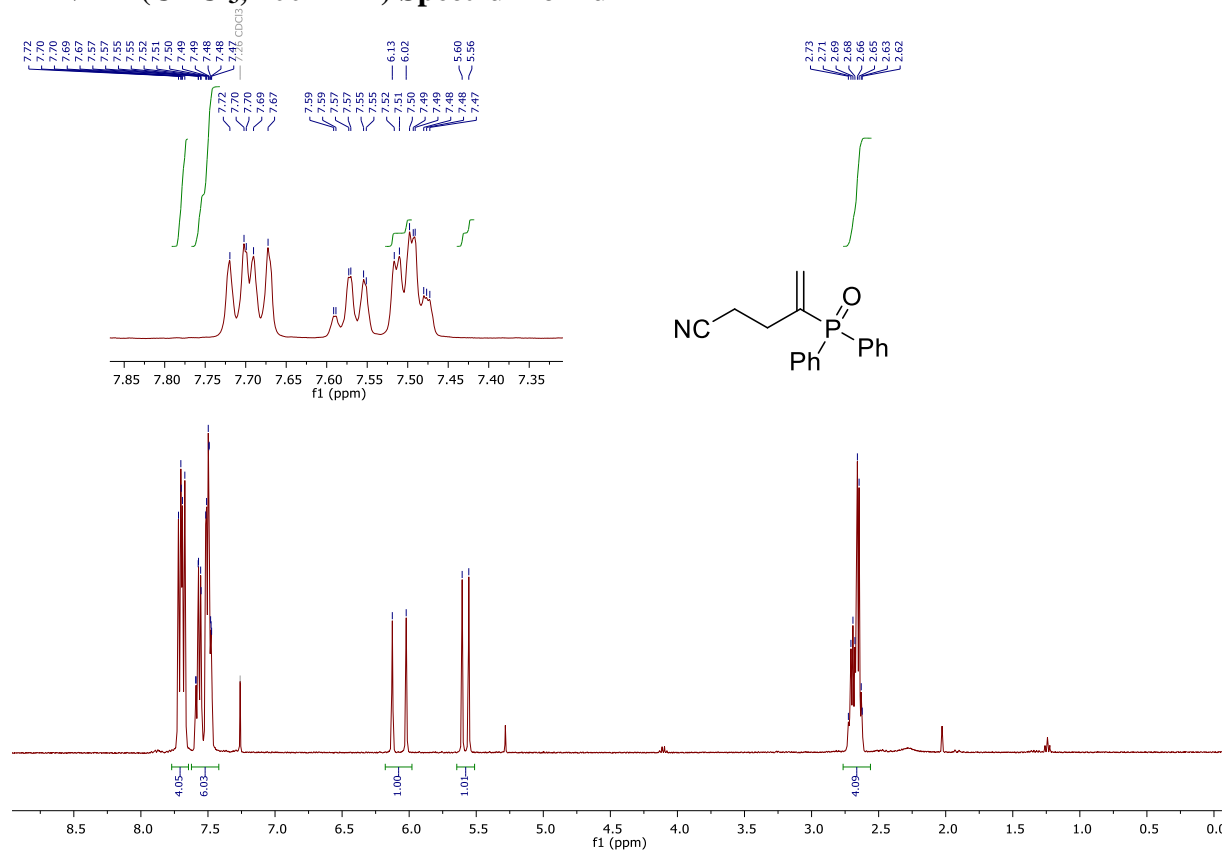

### <sup>13</sup>C NMR (CDCl<sub>3</sub>, 101 MHz) Spectrum of 1u

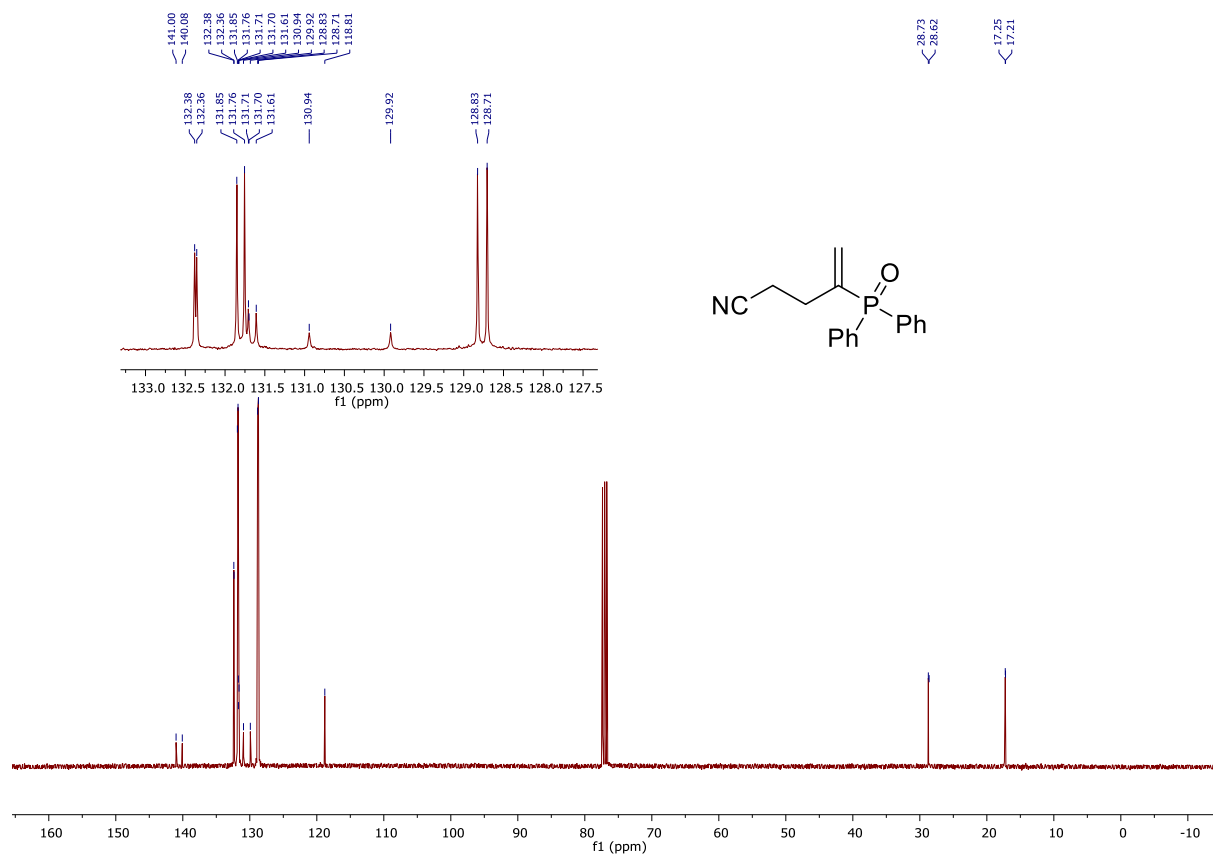

### <sup>31</sup>P NMR (CDCl<sub>3</sub>, 162 MHz) Spectrum of 1u

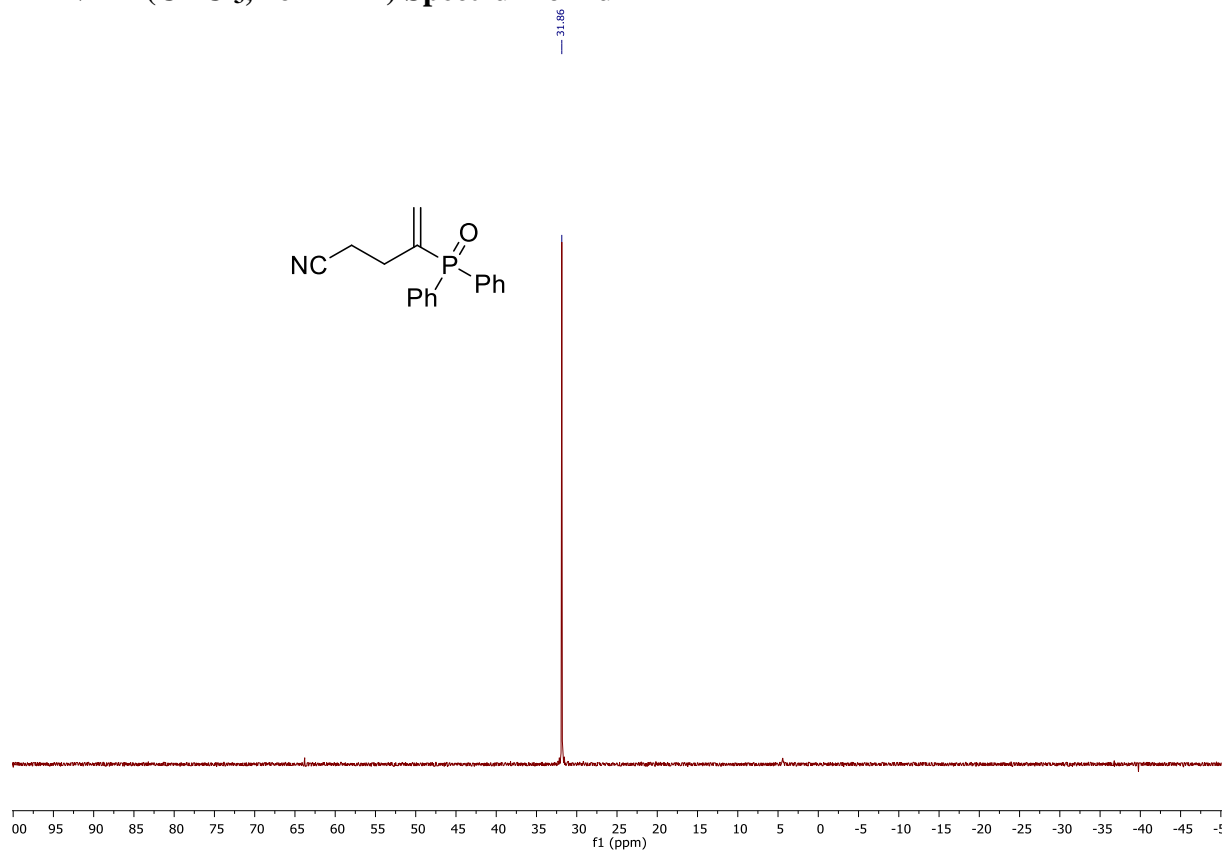

### <sup>1</sup>H NMR (CDCl<sub>3</sub>, 400 MHz) Spectrum of 1w

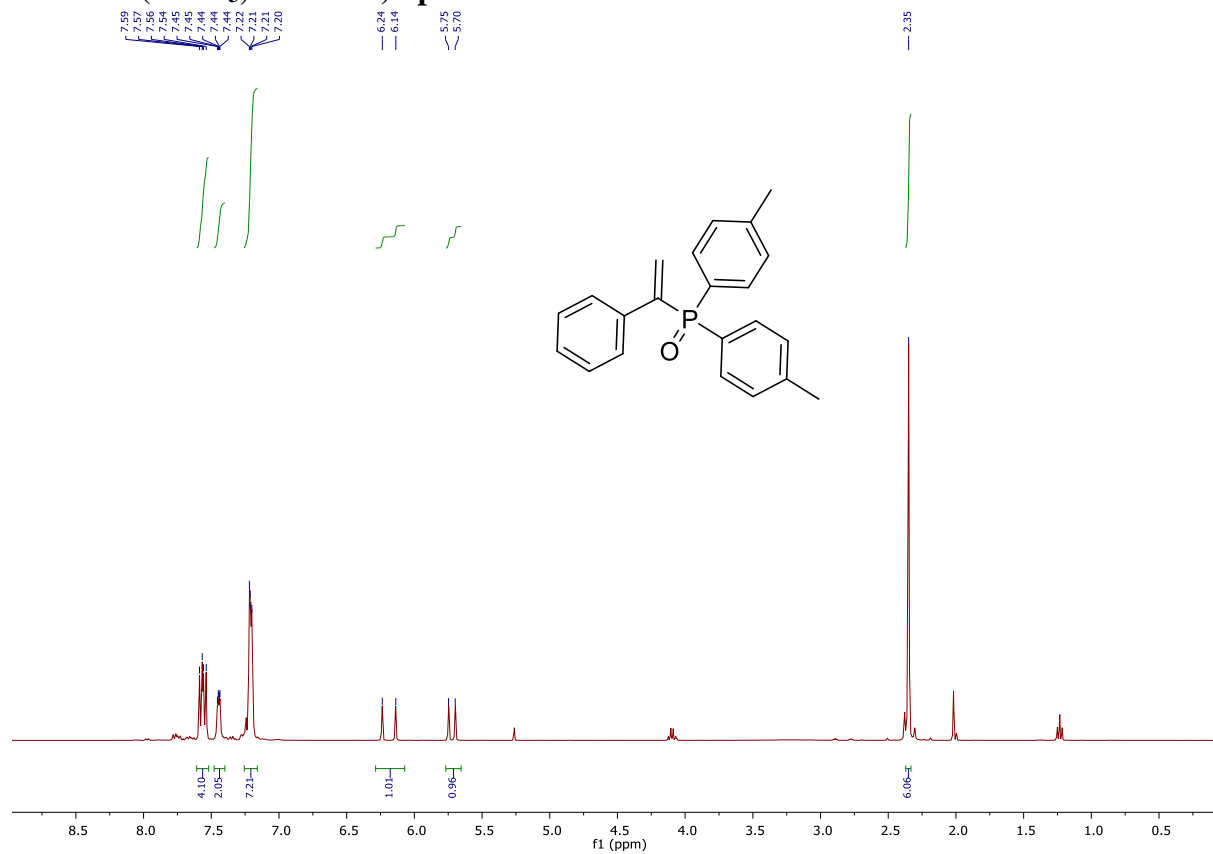

### <sup>13</sup>C NMR (CDCl<sub>3</sub>, 101 MHz) Spectrum of 1w

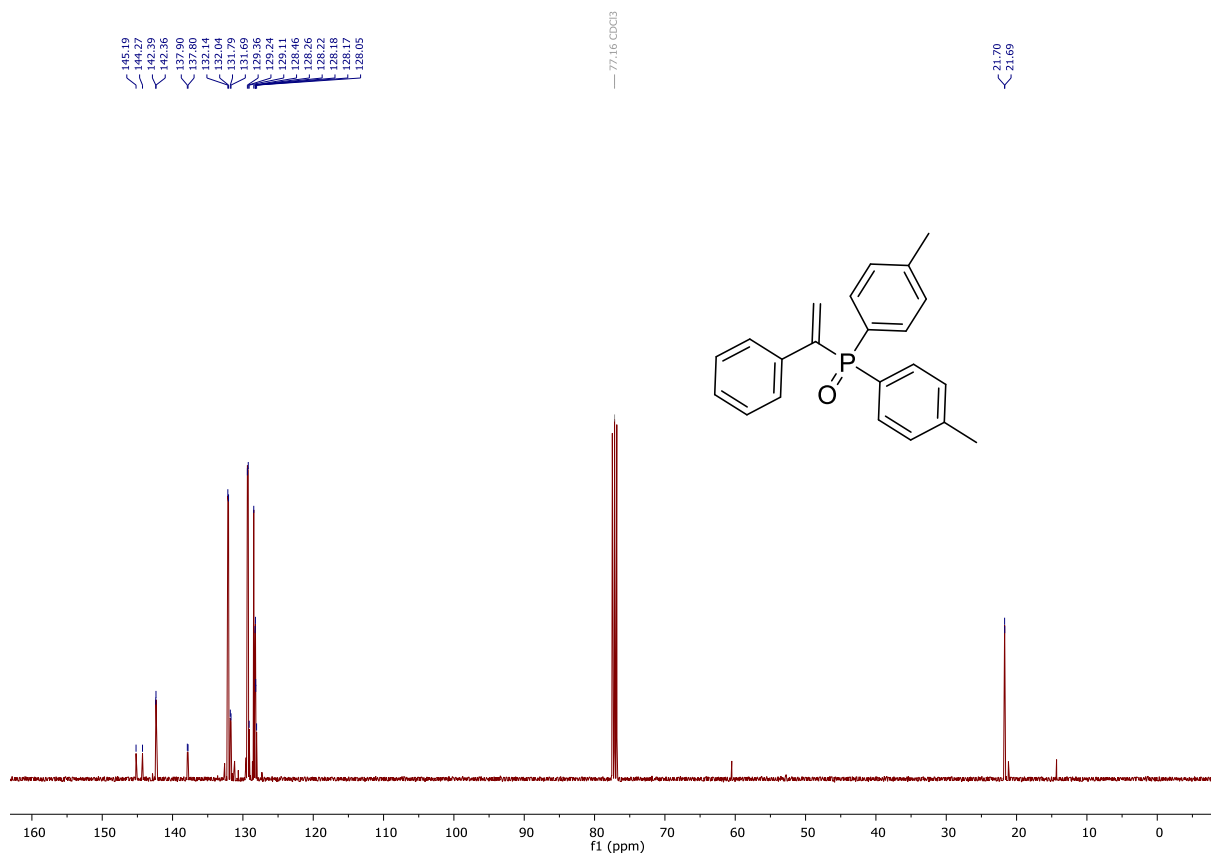

<sup>31</sup>P NMR (CDCl<sub>3</sub>, 162 MHz) Spectrum of 1w

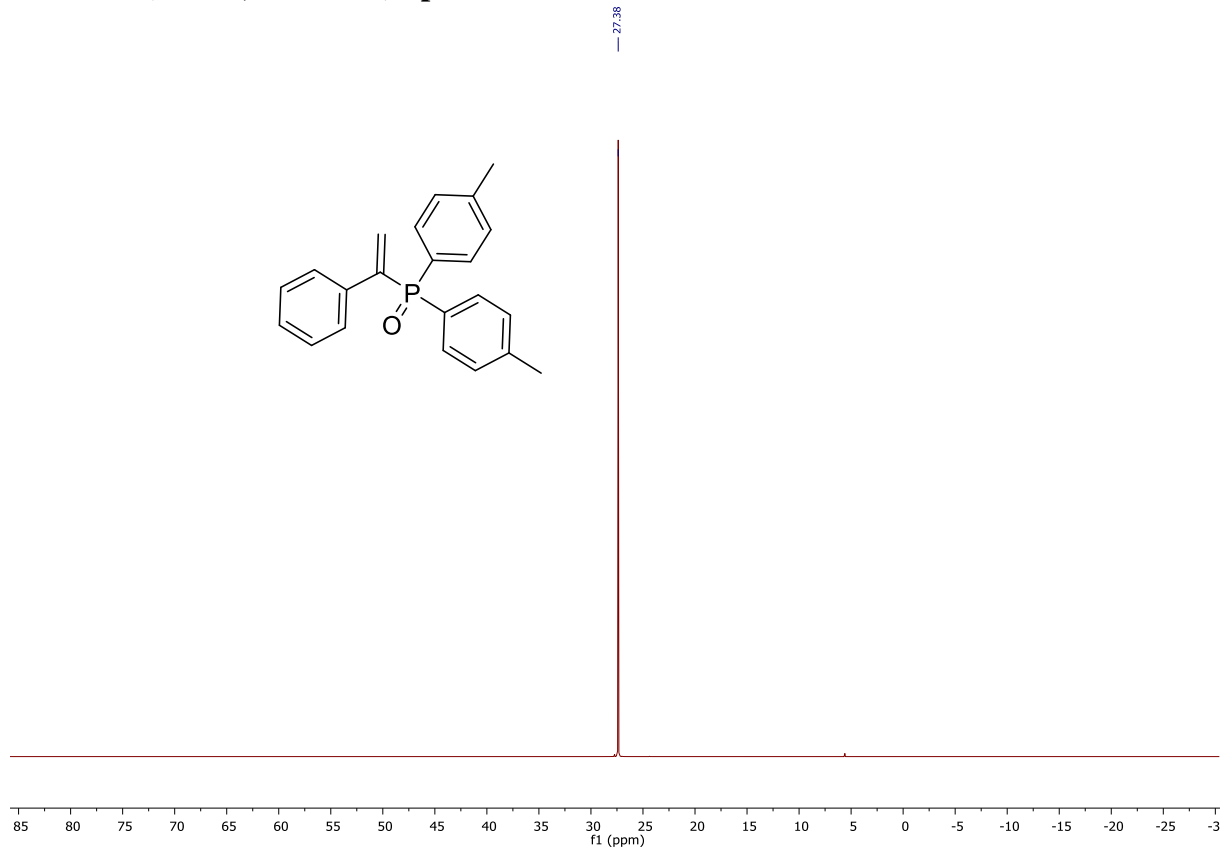

### <sup>1</sup>H NMR (CDCl<sub>3</sub>, 400 MHz) Spectrum of 1x

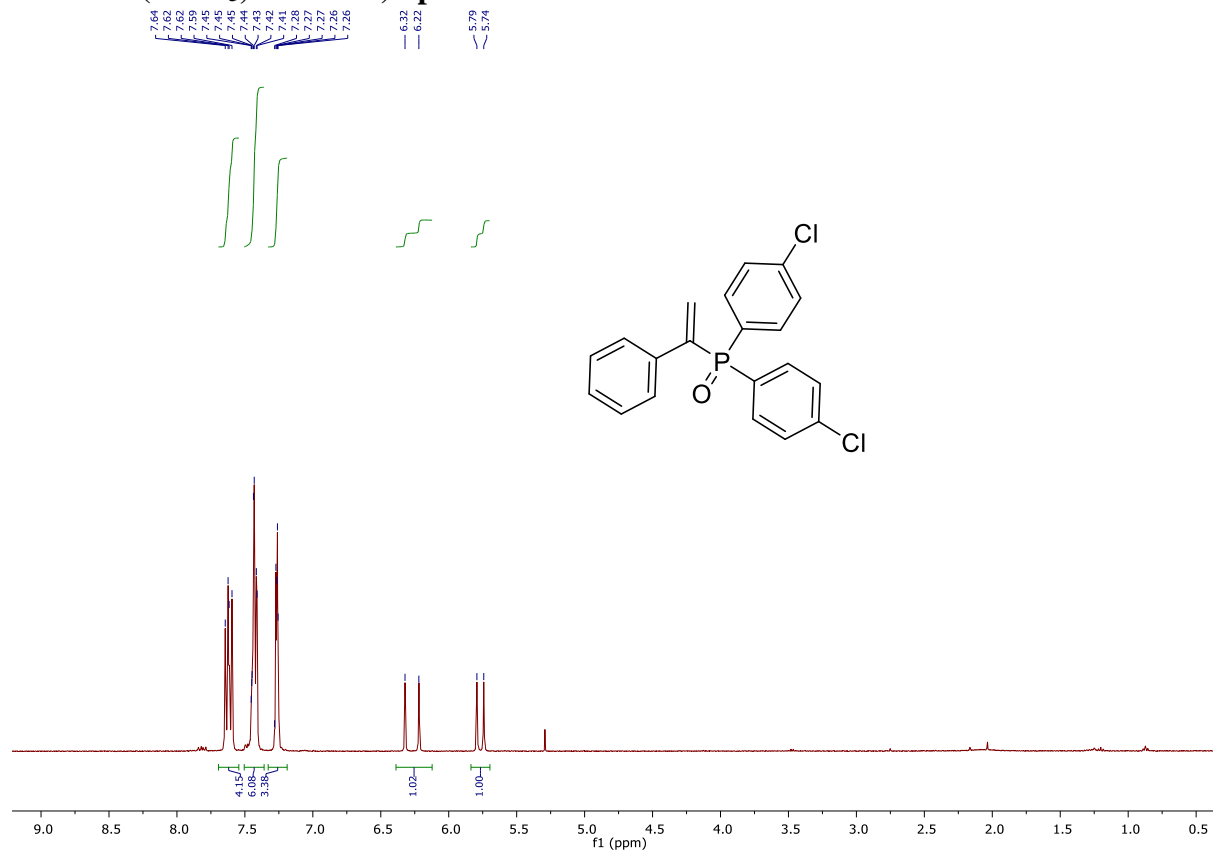

### <sup>13</sup>C NMR (CDCl<sub>3</sub>, 101 MHz) Spectrum of 1x

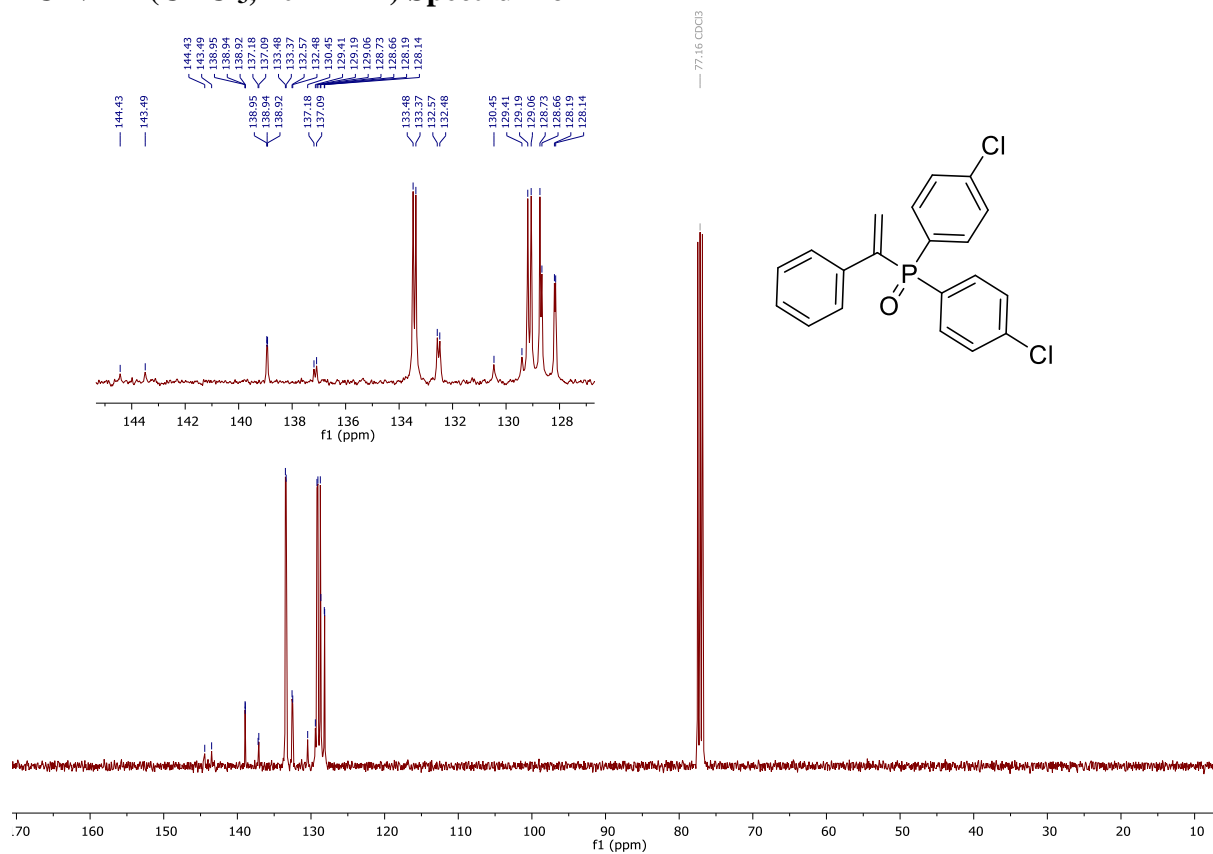

### $^{31}\text{P}$ NMR ( $\text{CDCl}_3$ , 162 MHz) Spectrum of **1x**

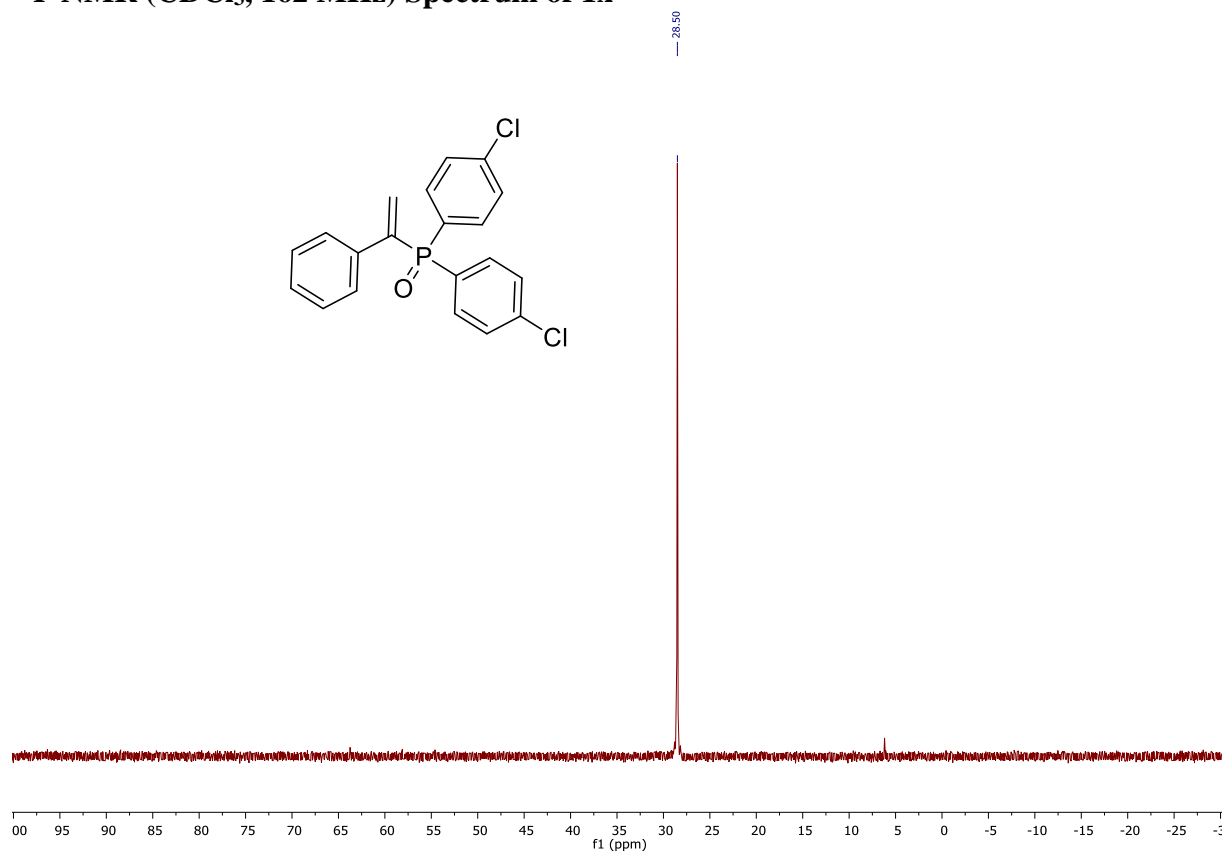

### $^1\text{H}$ NMR ( $\text{CDCl}_3$ , 400 MHz) Spectrum of **1y**

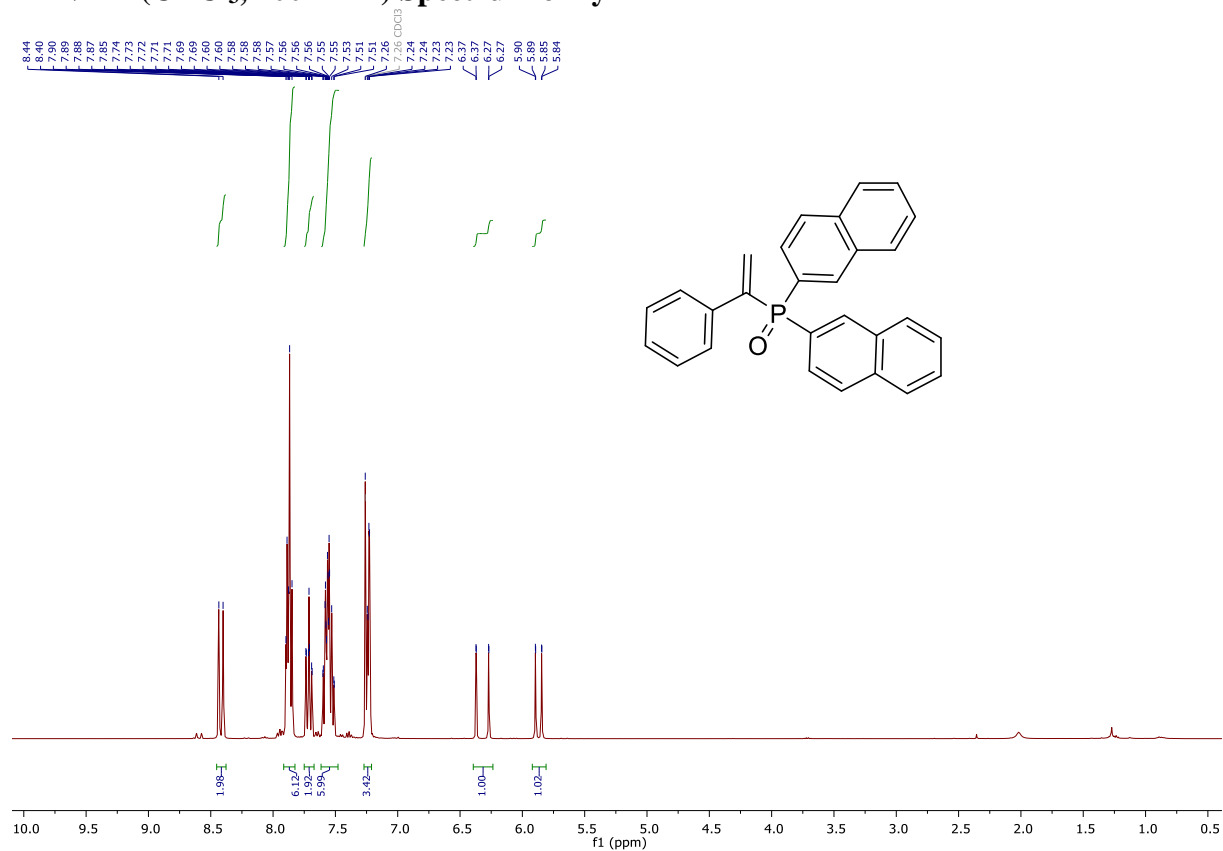



### <sup>13</sup>C NMR (CDCl<sub>3</sub>, 101 MHz) Spectrum of 1y

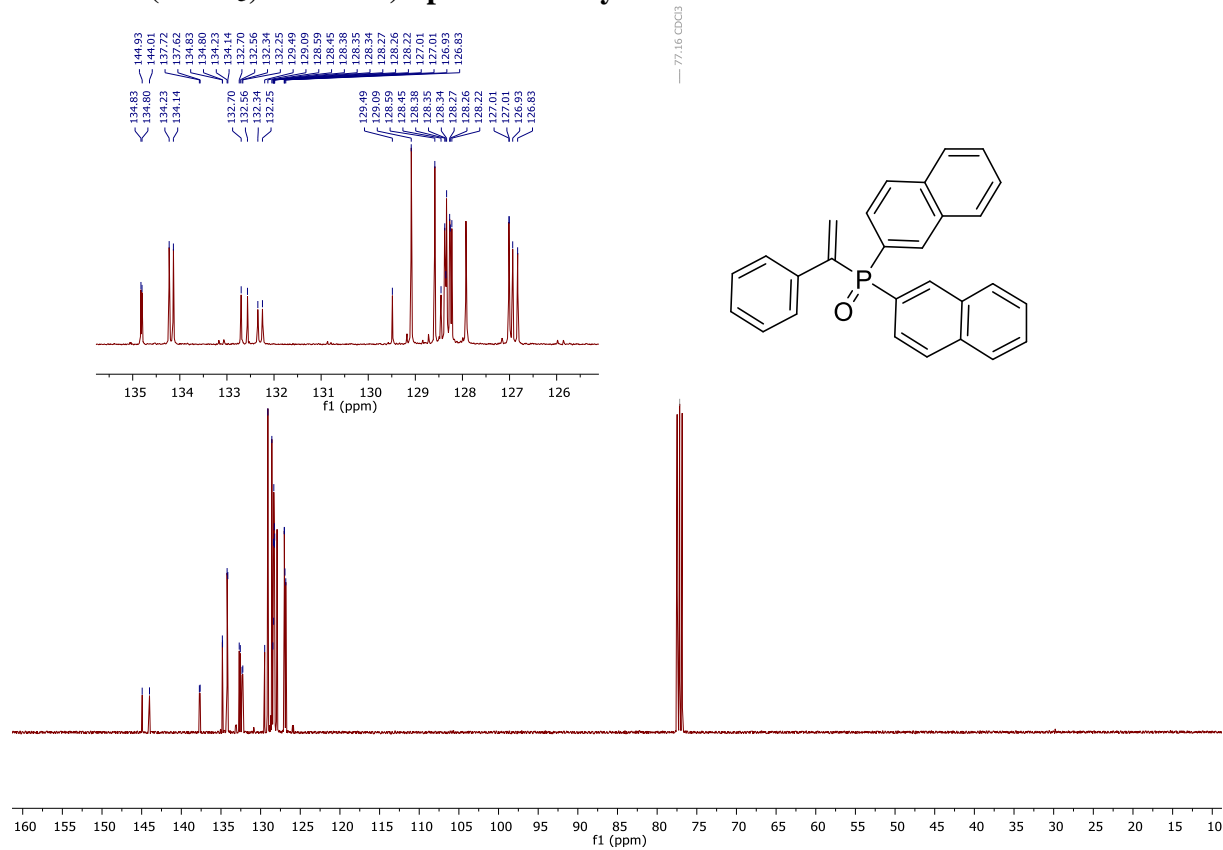

### <sup>31</sup>P NMR (CDCl<sub>3</sub>, 162 MHz) Spectrum of 1y

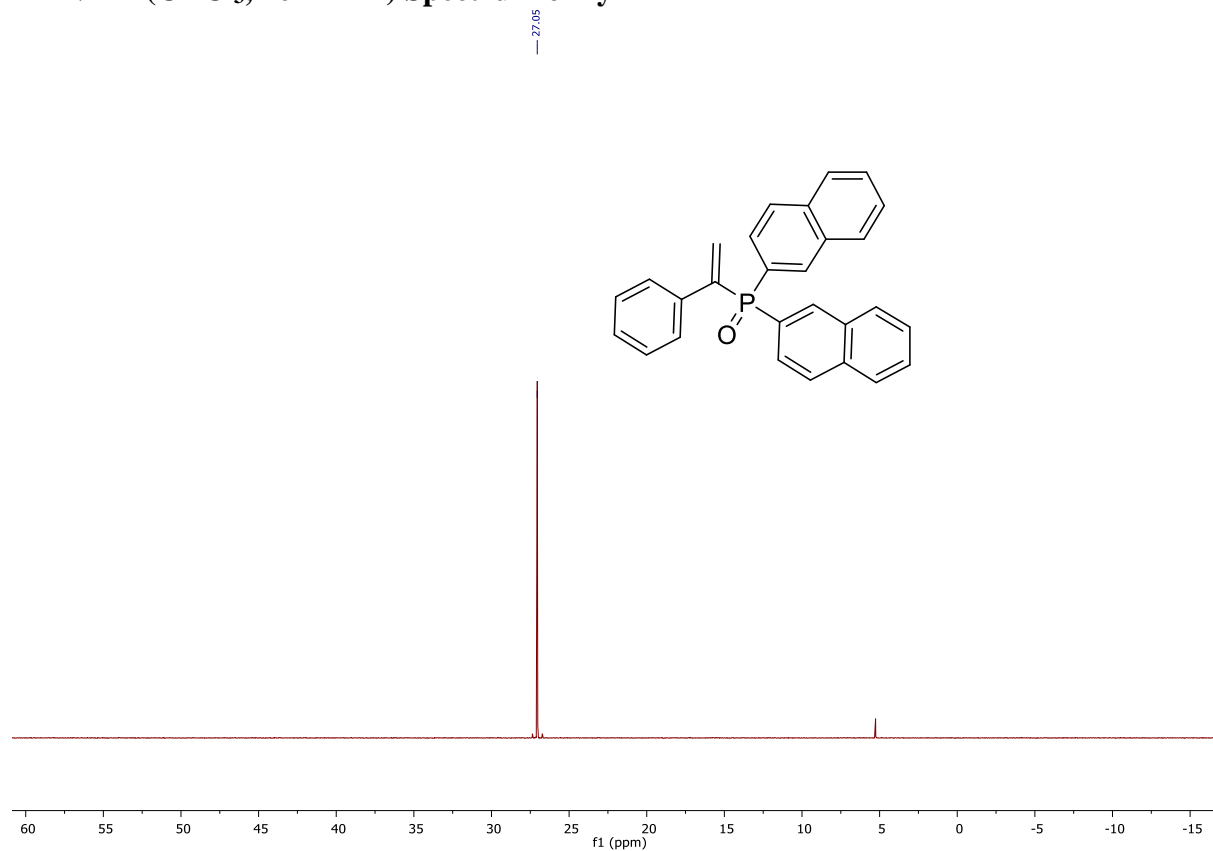

Supplement: d1sc06694c1.pdf [file d1sc06694c1.pdf]
